# Supplementary material for: miRNAs may play a major role in the control of gene expression in key pathobiological processes in Chagas disease cardiomyopathy
Source: PubMed Central journal article supplement (PMC7787679; doi:10.1371/journal.pntd.0008889), 2020-12-22
Supplement: pntd.0008889.s001.pdf [file pntd.0008889.s001.pdf]

**S1 table.** List of differentially expressed genes on human heart biopsies from end stage patients or organ donors.

| Gene Symbol  | Probe Name    | p (Corr) | Fold Change | Gene Name                                                                                 | Description                                                                                                                    |
|--------------|---------------|----------|-------------|-------------------------------------------------------------------------------------------|--------------------------------------------------------------------------------------------------------------------------------|
| IGJ          | A_23_P167168  | 1.91E-06 | 72.66       | immunoglobulin J polypeptide, linker protein for immunoglobulin alpha and mu polypeptides | Homo sapiens immunoglobulin J polypeptide, linker protein for immunoglobulin alpha and mu polypeptides (IGJ), mRNA [NM_144646] |
| IGLL1        | A_24_P239076  | 1.95E-06 | 132.21      | immunoglobulin lambda-like polypeptide 1                                                  | Homo sapiens immunoglobulin lambda-like polypeptide 1 (IGLL1), transcript variant 1, mRNA [NM_020070]                          |
| LINC00426    | A_33_P3333960 | 1.95E-06 | 61.03       | long intergenic non-protein coding RNA 426                                                | Homo sapiens long intergenic non-protein coding RNA 426 (LINC00426), non-coding RNA [NR_024464]                                |
| TBC1D10C     | A_33_P3328559 | 1.95E-06 | 30.33       | TBC1 domain family, member 10C                                                            | Homo sapiens TBC1 domain family, member 10C (TBC1D10C), mRNA [NM_198517]                                                       |
| FCRL6        | A_33_P3285734 | 1.95E-06 | 24.44       | Fc receptor-like 6                                                                        | Homo sapiens Fc receptor-like 6 (FCRL6), mRNA [NM_001004310]                                                                   |
| LOC96610     | A_33_P3376958 | 2.77E-06 | 144.01      | BMS1 homolog, ribosome assembly protein (yeast) pseudogene                                | Homo sapiens BMS1 homolog, ribosome assembly protein (yeast) pseudogene (LOC96610), non-coding RNA [NR_027293]                 |
| LOC100653210 | A_33_P3424612 | 3.28E-06 | 84.58       | ig kappa chain V-III region VG-like                                                       | immunoglobulin kappa variable 3-11 [Source:HGNC Symbol;Acc:5815] [ENST00000483158]                                             |
| KLRC4        | A_23_P218058  | 3.28E-06 | 17.81       | killer cell lectin-like receptor subfamily C, member 4                                    | Homo sapiens killer cell lectin-like receptor subfamily C, member 4 (KLRC4), mRNA [NM_013431]                                  |
| SCML4        | A_33_P3387691 | 3.48E-06 | 226.38      | sex comb on midleg-like 4 (Drosophila)                                                    | Homo sapiens sex comb on midleg-like 4 (Drosophila) (SCML4), mRNA [NM_198081]                                                  |
| RHOH         | A_23_P58132   | 3.50E-06 | 36.81       | ras homolog gene family, member H                                                         | Homo sapiens ras homolog gene family, member H (RHOH), mRNA [NM_004310]                                                        |

|         |               |          |        |                                                                                                       |                                                                                                                                                                    |
|---------|---------------|----------|--------|-------------------------------------------------------------------------------------------------------|--------------------------------------------------------------------------------------------------------------------------------------------------------------------|
| CTSW    | A_24_P396167  | 3.69E-06 | 21.47  | cathepsin W                                                                                           | Homo sapiens cathepsin W (CTSW), mRNA [NM_001335]                                                                                                                  |
| GFI1    | A_23_P257365  | 3.78E-06 | 40.11  | growth factor independent 1 transcription repressor                                                   | Homo sapiens growth factor independent 1 transcription repressor (GFI1), transcript variant 1, mRNA [NM_005263]                                                    |
| EOMES   | A_24_P97374   | 3.78E-06 | 27.45  | eomesodermin                                                                                          | Homo sapiens eomesodermin (EOMES), mRNA [NM_005442]                                                                                                                |
| ITGAL   | A_23_P206806  | 3.91E-06 | 32.61  | integrin, alpha L (antigen CD11A (p180), lymphocyte function-associated antigen 1; alpha polypeptide) | Homo sapiens integrin, alpha L (antigen CD11A (p180), lymphocyte function-associated antigen 1; alpha polypeptide) (ITGAL), transcript variant 1, mRNA [NM_002209] |
| ZNF683  | A_33_P3208970 | 4.19E-06 | 68.08  | zinc finger protein 683                                                                               | Homo sapiens zinc finger protein 683 (ZNF683), transcript variant 1, mRNA [NM_001114759]                                                                           |
| FCRL5   | A_23_P201211  | 4.19E-06 | 64.45  | Fc receptor-like 5                                                                                    | Homo sapiens Fc receptor-like 5 (FCRL5), transcript variant 1, mRNA [NM_031281]                                                                                    |
| SAMD3   | A_23_P93524   | 4.30E-06 | 22.92  | sterile alpha motif domain containing 3                                                               | Homo sapiens sterile alpha motif domain containing 3 (SAMD3), transcript variant 1, mRNA [NM_001017373]                                                            |
| TMC8    | A_23_P346093  | 4.30E-06 | 16.67  | transmembrane channel-like 8                                                                          | Homo sapiens transmembrane channel-like 8 (TMC8), mRNA [NM_152468]                                                                                                 |
| IGLL5   | A_33_P3379039 | 4.38E-06 | 653.81 | immunoglobulin lambda-like polypeptide 5                                                              | Homo sapiens immunoglobulin lambda-like polypeptide 5 (IGLL5), transcript variant 1, mRNA [NM_001178126]                                                           |
| GZMH    | A_23_P128993  | 4.40E-06 | 69.72  | granzyme H (cathepsin G-like 2, protein h-CCPX)                                                       | Homo sapiens granzyme H (cathepsin G-like 2, protein h-CCPX) (GZMH), mRNA [NM_033423]                                                                              |
| ITK     | A_23_P354151  | 4.87E-06 | 31.17  | IL2-inducible T-cell kinase                                                                           | Homo sapiens IL2-inducible T-cell kinase (ITK), mRNA [NM_005546]                                                                                                   |
| UBASH3A | A_23_P6293    | 4.87E-06 | 22.83  | ubiquitin associated and SH3 domain containing A                                                      | Homo sapiens ubiquitin associated and SH3 domain containing A (UBASH3A),                                                                                           |

|              |               |          |       |                                                  |                                                                                                                                                         |
|--------------|---------------|----------|-------|--------------------------------------------------|---------------------------------------------------------------------------------------------------------------------------------------------------------|
| ZAP70        | A_24_P169234  | 5.21E-06 | 16.56 | zeta-chain (TCR) associated protein kinase 70kDa | transcript variant 1, mRNA [NM_018961]<br>Homo sapiens zeta-chain (TCR) associated protein kinase 70kDa (ZAP70), transcript variant 1, mRNA [NM_001079] |
| SKAP1        | A_23_P100730  | 5.44E-06 | 41.14 | src kinase associated phosphoprotein 1           | Homo sapiens src kinase associated phosphoprotein 1 (SKAP1), transcript variant 1, mRNA [NM_003726]                                                     |
| FBXL16       | A_23_P406385  | 6.11E-06 | 29.65 | F-box and leucine-rich repeat protein 16         | Homo sapiens F-box and leucine-rich repeat protein 16 (FBXL16), mRNA [NM_153350]                                                                        |
| NKG7         | A_23_P119042  | 6.11E-06 | 12.41 | natural killer cell group 7 sequence             | Homo sapiens natural killer cell group 7 sequence (NKG7), mRNA [NM_005601]                                                                              |
| CD3G         | A_23_P98410   | 6.26E-06 | 33.30 | CD3g molecule, gamma (CD3-TCR complex)           | Homo sapiens CD3g molecule, gamma (CD3-TCR complex) (CD3G), mRNA [NM_000073]                                                                            |
| CCL4         | A_23_P207564  | 6.28E-06 | 20.66 | chemokine (C-C motif) ligand 4                   | Homo sapiens chemokine (C-C motif) ligand 4 (CCL4), transcript variant 1, mRNA [NM_002984]                                                              |
| THEMIS       | A_33_P3462422 | 6.89E-06 | 32.90 | thymocyte selection associated                   | Homo sapiens thymocyte selection associated (THEMIS), transcript variant 1, mRNA [NM_001164685]                                                         |
| LOC100128420 | A_32_P77102   | 6.99E-06 | 70.74 | uncharacterized LOC100128420                     | Homo sapiens uncharacterized LOC100128420 (LOC100128420), transcript variant 1, non-coding RNA [NR_038461]                                              |
| MCOLN2       | A_23_P23639   | 7.09E-06 | 24.06 | mucolipin 2                                      | Homo sapiens mucolipin 2 (MCOLN2), mRNA [NM_153259]                                                                                                     |
| MZB1         | A_23_P84596   | 7.92E-06 | 97.01 | marginal zone B and B1 cell-specific protein     | Homo sapiens marginal zone B and B1 cell-specific protein (MZB1), mRNA [NM_016459]                                                                      |
| GPR171       | A_23_P253317  | 8.83E-06 | 21.65 | G protein-coupled receptor 171                   | Homo sapiens G protein-coupled receptor 171 (GPR171), mRNA                                                                                              |

|          |                |          |       |                                                        |                                                                                                                                        |
|----------|----------------|----------|-------|--------------------------------------------------------|----------------------------------------------------------------------------------------------------------------------------------------|
| JAKMIP1  | A_33_P3221114  | 8.83E-06 | 16.84 | janus kinase and microtubule interacting protein 1     | [NM_013308]<br>Homo sapiens janus kinase and microtubule interacting protein 1 (JAKMIP1), transcript variant 2, mRNA [NM_144720]       |
| AMICA1   | A_24_P192914   | 8.84E-06 | 19.44 | adhesion molecule, interacts with CXADR antigen 1      | Homo sapiens adhesion molecule, interacts with CXADR antigen 1 (AMICA1), transcript variant 2, mRNA [NM_153206]                        |
| MIAT     | A_19_P00315524 | 9.00E-06 | 38.39 |                                                        | Homo sapiens myocardial infarction associated transcript (non-protein coding) (MIAT), transcript variant 1, non-coding RNA [NR_003491] |
| KLRC3    | A_23_P128281   | 9.02E-06 | 14.55 | killer cell lectin-like receptor subfamily C, member 3 | Homo sapiens killer cell lectin-like receptor subfamily C, member 3 (KLRC3), transcript variant 2, mRNA [NM_007333]                    |
| CD6      | A_23_P311875   | 9.05E-06 | 40.35 | CD6 molecule                                           | Homo sapiens CD6 molecule (CD6), mRNA [NM_006725]                                                                                      |
| TRAF3IP3 | A_33_P3281403  | 9.94E-06 | 30.74 | TRAF3 interacting protein 3                            | Homo sapiens TRAF3 interacting protein 3 (TRAF3IP3), mRNA [NM_025228]                                                                  |
| PRKCQ    | A_23_P1374     | 1.05E-05 | 16.80 | protein kinase C, theta                                | Homo sapiens protein kinase C, theta (PRKCQ), transcript variant 1, mRNA [NM_006257]                                                   |
| KLRC1    | A_23_P151046   | 1.23E-05 | 36.25 | killer cell lectin-like receptor subfamily C, member 1 | Homo sapiens killer cell lectin-like receptor subfamily C, member 1 (KLRC1), transcript variant 1, mRNA [NM_002259]                    |
| CD69     | A_33_P3241021  | 1.27E-05 | 20.02 | CD69 molecule                                          | CD69 molecule [Source:HGNC Symbol;Acc:1694] [ENST00000416624]                                                                          |
| TBX21    | A_23_P141555   | 1.37E-05 | 16.40 | T-box 21                                               | Homo sapiens T-box 21 (TBX21), mRNA [NM_013351]                                                                                        |
| SLAMF6   | A_33_P3303857  | 1.42E-05 | 15.64 | SLAM family member 6                                   | Homo sapiens SLAM family member 6                                                                                                      |

|         |               |          |       |                                          |                                                                                                                                                            |
|---------|---------------|----------|-------|------------------------------------------|------------------------------------------------------------------------------------------------------------------------------------------------------------|
| RUNX3   | A_33_P3221748 | 1.48E-05 | 16.78 | runt-related transcription factor 3      | (SLAMF6), transcript variant 1, mRNA [NM_001184714]<br>Homo sapiens runt-related transcription factor 3 (RUNX3), transcript variant 1, mRNA [NM_001031680] |
| IKZF1   | A_33_P3842556 | 1.50E-05 | 17.42 | IKAROS family zinc finger 1 (Ikaros)     | Homo sapiens IKAROS family zinc finger 1 (Ikaros) (IKZF1), transcript variant 1, mRNA [NM_006060]                                                          |
| CXCR3   | A_23_P114299  | 1.52E-05 | 38.47 | chemokine (C-X-C motif) receptor 3       | Homo sapiens chemokine (C-X-C motif) receptor 3 (CXCR3), transcript variant 1, mRNA [NM_001504]                                                            |
| FASLG   | A_23_P369815  | 1.52E-05 | 17.71 | Fas ligand (TNF superfamily, member 6)   | Homo sapiens Fas ligand (TNF superfamily, member 6) (FASLG), mRNA [NM_000639]                                                                              |
| CD8A    | A_32_P163247  | 1.55E-05 | 25.01 | CD8a molecule                            | Homo sapiens CD8a molecule (CD8A), transcript variant 1, mRNA [NM_001768]                                                                                  |
| STYK1   | A_23_P13822   | 1.55E-05 | 14.72 | serine/threonine/tyrosine kinase 1       | Homo sapiens serine/threonine/tyrosine kinase 1 (STYK1), mRNA [NM_018423]                                                                                  |
| RNF212  | A_33_P3273919 | 1.59E-05 | -4.29 | ring finger protein 212                  | Homo sapiens cDNA FLJ42587 fis, clone BRACE3009377. [AK124578]                                                                                             |
| CD96    | A_23_P44155   | 1.69E-05 | 40.67 | CD96 molecule                            | Homo sapiens CD96 molecule (CD96), transcript variant 1, mRNA [NM_198196]                                                                                  |
| ZNF831  | A_32_P206479  | 1.71E-05 | 37.35 | zinc finger protein 831                  | Homo sapiens zinc finger protein 831 (ZNF831), mRNA [NM_178457]                                                                                            |
| ZBP1    | A_23_P259141  | 1.90E-05 | 22.02 | Z-DNA binding protein 1                  | Homo sapiens Z-DNA binding protein 1 (ZBP1), transcript variant 1, mRNA [NM_030776]                                                                        |
| MATK    | A_23_P50678   | 1.90E-05 | 13.61 | megakaryocyte-associated tyrosine kinase | Homo sapiens megakaryocyte-associated tyrosine kinase (MATK), transcript variant 1, mRNA [NM_139355]                                                       |
| sept-06 | A_33_P3243554 | 1.90E-05 | 3.04  | septin 6                                 | Homo sapiens septin 6 (SEPT6), transcript variant V, mRNA [NM_145802]                                                                                      |

|         |               |          |        |                                                                                    |                                                                                                                                                  |
|---------|---------------|----------|--------|------------------------------------------------------------------------------------|--------------------------------------------------------------------------------------------------------------------------------------------------|
| IL2RG   | A_23_P148473  | 1.92E-05 | 14.87  | interleukin 2 receptor, gamma                                                      | Homo sapiens interleukin 2 receptor, gamma (IL2RG), mRNA [NM_000206]                                                                             |
| C8orf80 | A_33_P3246593 | 1.95E-05 | 17.49  | chromosome 8 open reading frame 80                                                 | Homo sapiens chromosome 8 open reading frame 80 (C8orf80), mRNA [NM_001010906]                                                                   |
| LY9     | A_24_P324674  | 2.01E-05 | 12.66  | lymphocyte antigen 9                                                               | Homo sapiens lymphocyte antigen 9 (LY9), transcript variant 1, mRNA [NM_002348]                                                                  |
| CSF2RA  | A_23_P501985  | 2.14E-05 | 6.06   | colony stimulating factor 2 receptor, alpha, low-affinity (granulocyte-macrophage) | Homo sapiens colony stimulating factor 2 receptor, alpha, low-affinity (granulocyte-macrophage) (CSF2RA), transcript variant 6, mRNA [NM_172249] |
| POU2AF1 | A_23_P312920  | 2.73E-05 | 105.43 | POU class 2 associating factor 1                                                   | Homo sapiens POU class 2 associating factor 1 (POU2AF1), mRNA [NM_006235]                                                                        |
| CD2     | A_23_P161076  | 2.74E-05 | 37.71  | CD2 molecule                                                                       | Homo sapiens CD2 molecule (CD2), mRNA [NM_001767]                                                                                                |
| MAP4K1  | A_23_P5002    | 2.74E-05 | 11.78  | mitogen-activated protein kinase kinase kinase kinase 1                            | Homo sapiens mitogen-activated protein kinase kinase kinase kinase 1 (MAP4K1), transcript variant 1, mRNA [NM_001042600]                         |
| TNIP3   | A_23_P386478  | 2.81E-05 | 3.77   | TNFAIP3 interacting protein 3                                                      | Homo sapiens TNFAIP3 interacting protein 3 (TNIP3), transcript variant 1, mRNA [NM_024873]                                                       |
| IL21R   | A_24_P227927  | 2.90E-05 | 15.69  | interleukin 21 receptor                                                            | Homo sapiens interleukin 21 receptor (IL21R), transcript variant 2, mRNA [NM_181078]                                                             |
| ACAP1   | A_23_P107336  | 2.91E-05 | 15.58  | ArfGAP with coiled-coil, ankyrin repeat and PH domains 1                           | Homo sapiens ArfGAP with coiled-coil, ankyrin repeat and PH domains 1 (ACAP1), mRNA [NM_014716]                                                  |
| SLAMF7  | A_24_P353638  | 2.95E-05 | 40.95  | SLAM family member 7                                                               | Homo sapiens SLAM family member 7 (SLAMF7), mRNA [NM_021181]                                                                                     |
| SH2D3A  | A_33_P3254320 | 2.95E-05 | 13.17  | SH2 domain containing 3A                                                           | Homo sapiens SH2 domain containing 3A                                                                                                            |

|              |               |          |       |                                                              |                                                                                                      |
|--------------|---------------|----------|-------|--------------------------------------------------------------|------------------------------------------------------------------------------------------------------|
| IL7R         | A_23_P404494  | 3.05E-05 | 49.73 | interleukin 7 receptor                                       | (SH2D3A), mRNA [NM_005490]<br>Homo sapiens interleukin 7 receptor (IL7R), mRNA [NM_002185]           |
| CCL5         | A_23_P152838  | 3.17E-05 | 77.89 | chemokine (C-C motif) ligand 5                               | Homo sapiens chemokine (C-C motif) ligand 5 (CCL5), mRNA [NM_002985]                                 |
| CRTAM        | A_23_P305092  | 3.17E-05 | 27.81 | cytotoxic and regulatory T cell molecule                     | Homo sapiens cytotoxic and regulatory T cell molecule (CRTAM), mRNA [NM_019604]                      |
| PVRIG        | A_33_P3351745 | 3.20E-05 | 16.05 | poliovirus receptor related immunoglobulin domain containing | Homo sapiens poliovirus receptor related immunoglobulin domain containing (PVRIG), mRNA [NM_024070]  |
| CD247        | A_23_P34676   | 3.23E-05 | 17.93 | CD247 molecule                                               | Homo sapiens CD247 molecule (CD247), transcript variant 1, mRNA [NM_198053]                          |
| CXorf65      | A_32_P101352  | 3.65E-05 | 16.71 | chromosome X open reading frame 65                           | Homo sapiens chromosome X open reading frame 65 (CXorf65), transcript variant 1, mRNA [NM_001025265] |
| CYTIP        | A_23_P90626   | 3.82E-05 | 12.10 | cytohesin 1 interacting protein                              | Homo sapiens cytohesin 1 interacting protein (CYTIP), mRNA [NM_004288]                               |
| CD8B         | A_23_P357881  | 3.82E-05 | 18.67 | CD8b molecule                                                | Homo sapiens CD8b molecule (CD8B), transcript variant 4, mRNA [NM_172102]                            |
| ITGB7        | A_23_P76529   | 3.82E-05 | 7.28  | integrin, beta 7                                             | Homo sapiens integrin, beta 7 (ITGB7), mRNA [NM_000889]                                              |
| LOC100505585 | A_33_P3290089 | 3.88E-05 | 14.23 | uncharacterized LOC100505585                                 | PREDICTED: Homo sapiens hypothetical LOC100505585 (LOC100505585), miscRNA [XR_109536]                |
| CXCR6        | A_23_P109913  | 4.35E-05 | 45.73 | chemokine (C-X-C motif) receptor 6                           | Homo sapiens chemokine (C-X-C motif) receptor 6 (CXCR6), mRNA [NM_006564]                            |
| CD48         | A_32_P175934  | 4.49E-05 | 25.69 | CD48 molecule                                                | Homo sapiens CD48 molecule (CD48), mRNA [NM_001778]                                                  |
| CXCR4        | A_23_P102000  | 4.57E-05 | 15.05 | chemokine (C-X-C motif) receptor 4                           | Homo sapiens chemokine (C-X-C motif) receptor 4 (CXCR4), transcript variant 1, mRNA [NM_001008540]   |
| KLRK1        | A_24_P193093  | 4.57E-05 | 14.54 | killer cell lectin-like receptor                             | Homo sapiens killer cell lectin-like                                                                 |

|          |               |          |       |                                                                                 |                                                                                                                                                                                 |
|----------|---------------|----------|-------|---------------------------------------------------------------------------------|---------------------------------------------------------------------------------------------------------------------------------------------------------------------------------|
| KLRD1    | A_23_P204208  | 5.02E-05 | 16.50 | subfamily K, member 1<br>killer cell lectin-like receptor subfamily D, member 1 | receptor subfamily K, member 1 (KLRK1), mRNA [NM_007360]<br>Homo sapiens killer cell lectin-like receptor subfamily D, member 1 (KLRD1), transcript variant 1, mRNA [NM_002262] |
| LAG3     | A_23_P116942  | 5.18E-05 | 13.11 | lymphocyte-activation gene 3                                                    | Homo sapiens lymphocyte-activation gene 3 (LAG3), mRNA [NM_002286]                                                                                                              |
| KIAA0125 | A_23_P140190  | 5.24E-05 | 23.21 | KIAA0125                                                                        | Homo sapiens KIAA0125 (KIAA0125), non-coding RNA [NR_026800]                                                                                                                    |
| PTPRCAP  | A_33_P3295056 | 5.28E-05 | 15.10 | protein tyrosine phosphatase, receptor type, C-associated protein               | Homo sapiens protein tyrosine phosphatase, receptor type, C-associated protein (PTPRCAP), mRNA [NM_005608]                                                                      |
| AMPD1    | A_23_P51787   | 5.67E-05 | 32.64 | adenosine monophosphate deaminase 1                                             | Homo sapiens adenosine monophosphate deaminase 1 (AMPD1), transcript variant 1, mRNA [NM_000036]                                                                                |
| SH2D1A   | A_33_P3283619 | 5.71E-05 | 11.64 | SH2 domain containing 1A                                                        | Homo sapiens SH2 domain containing 1A (SH2D1A), transcript variant 2, mRNA [NM_001114937]                                                                                       |
| CD40LG   | A_33_P3250680 | 5.81E-05 | 37.87 | CD40 ligand                                                                     | Homo sapiens CD40 ligand (CD40LG), mRNA [NM_000074]                                                                                                                             |
| AOAH     | A_23_P145718  | 6.05E-05 | 21.84 | acyloxyacyl hydrolase (neutrophil)                                              | Homo sapiens acyloxyacyl hydrolase (neutrophil) (AOAH), transcript variant 1, mRNA [NM_001637]                                                                                  |
| PTPN7    | A_23_P201778  | 6.19E-05 | 14.81 | protein tyrosine phosphatase, non-receptor type 7                               | Homo sapiens protein tyrosine phosphatase, non-receptor type 7 (PTPN7), transcript variant 2, mRNA [NM_080588]                                                                  |
| PBX4     | A_23_P90419   | 6.25E-05 | 43.68 | pre-B-cell leukemia homeobox 4                                                  | Homo sapiens pre-B-cell leukemia homeobox 4 (PBX4), transcript variant 1, mRNA [NM_025245]                                                                                      |
| SYTL1    | A_33_P3266744 | 6.25E-05 | 6.67  | synaptotagmin-like 1                                                            | Homo sapiens synaptotagmin-like 1                                                                                                                                               |

|        |               |          |       |                                                               |                                                                                                                                                       |
|--------|---------------|----------|-------|---------------------------------------------------------------|-------------------------------------------------------------------------------------------------------------------------------------------------------|
| DEF6   | A_23_P321913  | 6.37E-05 | 13.18 | differentially expressed in FDCP 6 homolog (mouse)            | (SYTL1), transcript variant 2, mRNA [NM_032872]<br>Homo sapiens differentially expressed in FDCP 6 homolog (mouse) (DEF6), mRNA [NM_022047]           |
| CD27   | A_23_P48088   | 6.67E-05 | 14.86 | CD27 molecule                                                 | Homo sapiens CD27 molecule (CD27), mRNA [NM_001242]                                                                                                   |
| PRDM1  | A_23_P350451  | 6.82E-05 | 26.79 | PR domain containing 1, with ZNF domain                       | Homo sapiens PR domain containing 1, with ZNF domain (PRDM1), transcript variant 1, mRNA [NM_001198]                                                  |
| PTPN22 | A_33_P3241984 | 7.35E-05 | 16.75 | protein tyrosine phosphatase, non-receptor type 22 (lymphoid) | Homo sapiens protein tyrosine phosphatase, non-receptor type 22 (lymphoid) (PTPN22), transcript variant 1, mRNA [NM_015967]                           |
| S100Z  | A_24_P12136   | 7.63E-05 | 6.91  | S100 calcium binding protein Z                                | Homo sapiens S100 calcium binding protein Z (S100Z), mRNA [NM_130772]                                                                                 |
| TARP   | A_33_P3225625 | 8.29E-05 | 14.67 | TCR gamma alternate reading frame protein                     | Homo sapiens TCR gamma alternate reading frame protein (TARP), nuclear gene encoding mitochondrial protein, transcript variant 1, mRNA [NM_001003799] |
| CD244  | A_23_P85453   | 8.60E-05 | 11.50 | CD244 molecule, natural killer cell receptor 2B4              | Homo sapiens CD244 molecule, natural killer cell receptor 2B4 (CD244), transcript variant 1, mRNA [NM_016382]                                         |
| MEI1   | A_23_P211561  | 8.73E-05 | 28.99 | meiosis inhibitor 1                                           | Homo sapiens meiosis inhibitor 1 (MEI1), mRNA [NM_152513]                                                                                             |
| PARP8  | A_23_P121898  | 9.04E-05 | 4.98  | poly (ADP-ribose) polymerase family, member 8                 | Homo sapiens poly (ADP-ribose) polymerase family, member 8 (PARP8), transcript variant 2, mRNA [NM_024615]                                            |
| RAB39B | A_24_P408603  | 9.24E-05 | 14.79 | RAB39B, member RAS oncogene family                            | Homo sapiens RAB39B, member RAS oncogene family (RAB39B), mRNA [NM_171998]                                                                            |
| IL2RB  | A_24_P203000  | 9.29E-05 | 21.42 | interleukin 2 receptor, beta                                  | Homo sapiens interleukin 2 receptor,                                                                                                                  |

|            |               |          |       |                                                                      |                                                                                                                                  |
|------------|---------------|----------|-------|----------------------------------------------------------------------|----------------------------------------------------------------------------------------------------------------------------------|
| LAX1       | A_23_P438     | 9.78E-05 | 17.61 | lymphocyte transmembrane adaptor 1                                   | beta (IL2RB), mRNA [NM_000878]<br>Homo sapiens lymphocyte transmembrane adaptor 1 (LAX1), transcript variant 1, mRNA [NM_017773] |
| LINC00256B | A_32_P99347   | 1.04E-04 | 5.22  | long intergenic non-protein coding RNA 256B                          | Homo sapiens long intergenic non-protein coding RNA 256B (LINC00256B), non-coding RNA [NR_024376]                                |
| BAG1       | A_33_P3290919 | 1.04E-04 | -2.36 | BCL2-associated athanogene                                           | Homo sapiens BCL2-associated athanogene (BAG1), transcript variant 1, mRNA [NM_001172415]                                        |
| CD3E       | A_23_P416747  | 1.13E-04 | 7.28  | CD3e molecule, epsilon (CD3-TCR complex)                             | Homo sapiens CD3e molecule, epsilon (CD3-TCR complex) (CD3E), mRNA [NM_000733]                                                   |
| CD84       | A_24_P362193  | 1.14E-04 | 11.12 | CD84 molecule                                                        | Homo sapiens CD84 molecule (CD84), transcript variant 2, mRNA [NM_003874]                                                        |
| ITGA4      | A_23_P56505   | 1.14E-04 | 14.34 | integrin, alpha 4 (antigen CD49D, alpha 4 subunit of VLA-4 receptor) | Homo sapiens integrin, alpha 4 (antigen CD49D, alpha 4 subunit of VLA-4 receptor) (ITGA4), mRNA [NM_000885]                      |
| RAB37      | A_33_P3314594 | 1.21E-04 | 4.45  | RAB37, member RAS oncogene family                                    | Homo sapiens RAB37, member RAS oncogene family (RAB37), transcript variant 3, mRNA [NM_175738]                                   |
| sept-01    | A_23_P21057   | 1.21E-04 | 24.25 | septin 1                                                             | Homo sapiens septin 1 (SEPT1), mRNA [NM_052838]                                                                                  |
| TRAT1      | A_23_P212568  | 1.24E-04 | 18.76 | T cell receptor associated transmembrane adaptor 1                   | Homo sapiens T cell receptor associated transmembrane adaptor 1 (TRAT1), mRNA [NM_016388]                                        |
| DENND1C    | A_23_P78608   | 1.30E-04 | 8.57  | DENN/MADD domain containing 1C                                       | Homo sapiens DENN/MADD domain containing 1C (DENND1C), mRNA [NM_024898]                                                          |
| SP140      | A_24_P328504  | 1.30E-04 | 5.50  | SP140 nuclear body protein                                           | Homo sapiens SP140 nuclear body protein (SP140), transcript variant 1, mRNA [NM_007237]                                          |
| LOC606724  | A_33_P3242614 | 1.34E-04 | 11.05 | coronin, actin binding protein,                                      | Homo sapiens coronin, actin binding                                                                                              |

|          |                |          |        |                                                             |                                                                                                                            |
|----------|----------------|----------|--------|-------------------------------------------------------------|----------------------------------------------------------------------------------------------------------------------------|
|          |                |          |        | 1A pseudogene                                               | protein, 1A pseudogene (LOC606724), non-coding RNA [NR_002454]                                                             |
| CCL17    | A_23_P26325    | 1.40E-04 | 18.55  | chemokine (C-C motif) ligand 17                             | Homo sapiens chemokine (C-C motif) ligand 17 (CCL17), mRNA [NM_002987]                                                     |
| EXOC3L4  | A_33_P3360972  | 1.40E-04 | 8.50   | exocyst complex component 3-like 4                          | Homo sapiens exocyst complex component 3-like 4 (EXOC3L4), mRNA [NM_001077594]                                             |
| BCL11B   | A_23_P205738   | 1.45E-04 | 13.71  | B-cell CLL/lymphoma 11B (zinc finger protein)               | Homo sapiens B-cell CLL/lymphoma 11B (zinc finger protein) (BCL11B), transcript variant 1, mRNA [NM_138576]                |
| LCK      | A_33_P3382746  | 1.53E-04 | 10.23  | lymphocyte-specific protein tyrosine kinase                 | Homo sapiens lymphocyte-specific protein tyrosine kinase (LCK), transcript variant 2, mRNA [NM_005356]                     |
| PRF1     | A_23_P1473     | 1.53E-04 | 6.10   | perforin 1 (pore forming protein)                           | Homo sapiens perforin 1 (pore forming protein) (PRF1), transcript variant 1, mRNA [NM_005041]                              |
| IL16     | A_23_P61057    | 1.53E-04 | 5.71   | interleukin 16                                              | Homo sapiens interleukin 16 (IL16), transcript variant 1, mRNA [NM_004513]                                                 |
| SIT1     | A_23_P43369    | 1.59E-04 | 13.19  | signaling threshold regulating transmembrane adaptor 1      | Homo sapiens signaling threshold regulating transmembrane adaptor 1 (SIT1), mRNA [NM_014450]                               |
| FLJ32255 | A_19_P00320759 | 1.68E-04 | 4.12   | uncharacterized LOC643977                                   | PREDICTED: Homo sapiens hypothetical LOC643977 (FLJ32255), miscRNA [XR_108575]                                             |
| S1PR4    | A_33_P3281273  | 1.78E-04 | 7.14   | sphingosine-1-phosphate receptor 4                          | Homo sapiens sphingosine-1-phosphate receptor 4 (S1PR4), mRNA [NM_003775]                                                  |
| CARD11   | A_23_P82324    | 1.80E-04 | 7.34   | caspase recruitment domain family, member 11                | Homo sapiens caspase recruitment domain family, member 11 (CARD11), mRNA [NM_032415]                                       |
| D4S234E  | A_33_P3259135  | 1.81E-04 | -13.28 | DNA segment on chromosome 4 (unique) 234 expressed sequence | Homo sapiens DNA segment on chromosome 4 (unique) 234 expressed sequence (D4S234E), transcript variant 1, mRNA [NM_014392] |

|          |               |          |       |                                                              |                                                                                                             |
|----------|---------------|----------|-------|--------------------------------------------------------------|-------------------------------------------------------------------------------------------------------------|
| SCARNA17 | A_32_P37592   | 1.85E-04 | 3.66  | small Cajal body-specific RNA 17                             | Homo sapiens small Cajal body-specific RNA 17 (SCARNA17), guide RNA [NR_003003]                             |
| PYHIN1   | A_24_P139604  | 2.09E-04 | 9.96  | pyrin and HIN domain family, member 1                        | Homo sapiens pyrin and HIN domain family, member 1 (PYHIN1), transcript variant 4, mRNA [NM_198930]         |
| EVI2B    | A_23_P66694   | 2.10E-04 | 9.97  | ecotropic viral integration site 2B                          | Homo sapiens ecotropic viral integration site 2B (EVI2B), mRNA [NM_006495]                                  |
| IFRD2    | A_23_P92132   | 2.11E-04 | -2.10 | interferon-related developmental regulator 2                 | Homo sapiens interferon-related developmental regulator 2 (IFRD2), mRNA [NM_006764]                         |
| CD3D     | A_33_P3375541 | 2.51E-04 | 5.87  | CD3d molecule, delta (CD3-TCR complex)                       | Homo sapiens CD3d molecule, delta (CD3-TCR complex) (CD3D), transcript variant 1, mRNA [NM_000732]          |
| AIM1     | A_23_P70785   | 2.51E-04 | 5.75  | absent in melanoma 1                                         | Homo sapiens absent in melanoma 1 (AIM1), mRNA [NM_001624]                                                  |
| SIRPG    | A_23_P28857   | 2.55E-04 | 9.35  | signal-regulatory protein gamma                              | Homo sapiens signal-regulatory protein gamma (SIRPG), transcript variant 1, mRNA [NM_018556]                |
| GBP5     | A_23_P74290   | 2.62E-04 | 17.44 | guanylate binding protein 5                                  | Homo sapiens guanylate binding protein 5 (GBP5), transcript variant 1, mRNA [NM_052942]                     |
| TAGAP    | A_24_P354724  | 2.66E-04 | 17.92 | T-cell activation RhoGTPase activating protein               | Homo sapiens T-cell activation RhoGTPase activating protein (TAGAP), transcript variant 2, mRNA [NM_054114] |
| HCST     | A_23_P39386   | 2.66E-04 | 9.82  | hematopoietic cell signal transducer                         | Homo sapiens hematopoietic cell signal transducer (HCST), transcript variant 1, mRNA [NM_014266]            |
| AIM2     | A_32_P44394   | 2.70E-04 | 34.08 | absent in melanoma 2                                         | Homo sapiens absent in melanoma 2 (AIM2), mRNA [NM_004833]                                                  |
| SMPD3    | A_23_P163567  | 2.70E-04 | 19.07 | sphingomyelin phosphodiesterase 3, neutral membrane (neutral | Homo sapiens sphingomyelin phosphodiesterase 3, neutral membrane (neutral sphingomyelinase II) (SMPD3),     |

|         |               |          |        |                                                                              |                                                                                                                          |
|---------|---------------|----------|--------|------------------------------------------------------------------------------|--------------------------------------------------------------------------------------------------------------------------|
| CASS4   | A_23_P91283   | 2.71E-04 | 3.87   | sphingomyelinase II)<br>Cas scaffolding protein family member 4              | mRNA [NM_018667]<br>Homo sapiens Cas scaffolding protein family member 4 (CASS4), transcript variant 2, mRNA [NM_020356] |
| GZMB    | A_23_P117602  | 2.73E-04 | 7.28   | granzyme B (granzyme 2, cytotoxic T-lymphocyte-associated serine esterase 1) | Homo sapiens granzyme B (granzyme 2, cytotoxic T-lymphocyte-associated serine esterase 1) (GZMB), mRNA [NM_004131]       |
| TRIM4   | A_24_P68247   | 2.74E-04 | 2.56   | tripartite motif containing 4                                                | Homo sapiens tripartite motif containing 4 (TRIM4), transcript variant alpha, mRNA [NM_033017]                           |
| PNOC    | A_23_P253321  | 2.79E-04 | 23.28  | prepronociceptin                                                             | Homo sapiens prepronociceptin (PNOC), mRNA [NM_006228]                                                                   |
| HSH2D   | A_23_P153372  | 2.87E-04 | 19.02  | hematopoietic SH2 domain containing                                          | Homo sapiens hematopoietic SH2 domain containing (HSH2D), mRNA [NM_032855]                                               |
| CST7    | A_23_P68601   | 2.90E-04 | 10.67  | cystatin F (leukocystatin)                                                   | Homo sapiens cystatin F (leukocystatin) (CST7), mRNA [NM_003650]                                                         |
| AGXT2L1 | A_23_P257231  | 2.96E-04 | -10.91 | alanine-glyoxylate aminotransferase 2-like 1                                 | Homo sapiens alanine-glyoxylate aminotransferase 2-like 1 (AGXT2L1), transcript variant 1, mRNA [NM_031279]              |
| IKZF3   | A_23_P376060  | 3.09E-04 | 14.07  | IKAROS family zinc finger 3 (Aiolos)                                         | Homo sapiens IKAROS family zinc finger 3 (Aiolos) (IKZF3), transcript variant 1, mRNA [NM_012481]                        |
| CDH9    | A_23_P92999   | 3.09E-04 | -4.13  | cadherin 9, type 2 (T1-cadherin)                                             | Homo sapiens cadherin 9, type 2 (T1-cadherin) (CDH9), mRNA [NM_016279]                                                   |
| CD37    | A_24_P82749   | 3.12E-04 | 9.60   | CD37 molecule                                                                | Homo sapiens CD37 molecule (CD37), transcript variant 1, mRNA [NM_001774]                                                |
| TSC22D3 | A_33_P3237634 | 3.12E-04 | 4.90   | TSC22 domain family, member 3                                                | Homo sapiens TSC22 domain family, member 3 (TSC22D3), transcript variant 2, mRNA [NM_004089]                             |
| MYB     | A_23_P31073   | 3.17E-04 | 11.47  | v-myb myeloblastosis viral oncogene homolog (avian)                          | Homo sapiens v-myb myeloblastosis viral oncogene homolog (avian) (MYB),                                                  |

|           |               |          |       |                                                            |                                                                                                               |
|-----------|---------------|----------|-------|------------------------------------------------------------|---------------------------------------------------------------------------------------------------------------|
| DOCK10    | A_23_P16722   | 3.21E-04 | 6.54  | dedicator of cytokinesis 10                                | transcript variant 2, mRNA [NM_005375]<br>Homo sapiens dedicator of cytokinesis 10 (DOCK10), mRNA [NM_014689] |
| CASP8     | A_24_P148499  | 3.27E-04 | 6.20  | caspase 8, apoptosis-related cysteine peptidase            | Homo sapiens caspase 8, apoptosis-related cysteine peptidase (CASP8), transcript variant E, mRNA [NM_033358]  |
| TTC14     | A_23_P212511  | 3.32E-04 | 2.15  | tetratricopeptide repeat domain 14                         | Homo sapiens tetratricopeptide repeat domain 14 (TTC14), transcript variant 2, mRNA [NM_001042601]            |
| PQLC3     | A_23_P131375  | 3.34E-04 | 2.74  | PQ loop repeat containing 3                                | Homo sapiens PQ loop repeat containing 3 (PQLC3), mRNA [NM_152391]                                            |
| BIN2      | A_23_P162386  | 3.35E-04 | 11.46 | bridging integrator 2                                      | Homo sapiens bridging integrator 2 (BIN2), mRNA [NM_016293]                                                   |
| BTK       | A_23_P137139  | 3.38E-04 | 7.84  | Bruton agammaglobulinemia tyrosine kinase                  | Homo sapiens Bruton agammaglobulinemia tyrosine kinase (BTK), mRNA [NM_000061]                                |
| LOC153684 | A_33_P3323760 | 3.39E-04 | 3.45  | uncharacterized LOC153684                                  | Homo sapiens uncharacterized LOC153684 (LOC153684), non-coding RNA [NR_015447]                                |
| PSTPIP1   | A_23_P48997   | 3.49E-04 | 5.22  | proline-serine-threonine phosphatase interacting protein 1 | Homo sapiens proline-serine-threonine phosphatase interacting protein 1 (PSTPIP1), mRNA [NM_003978]           |
| PIWIL4    | A_23_P427760  | 3.50E-04 | 3.07  | piwi-like 4 (Drosophila)                                   | Homo sapiens piwi-like 4 (Drosophila) (PIWIL4), mRNA [NM_152431]                                              |
| CNTRL     | A_33_P3257554 | 3.51E-04 | 3.30  | centriolin                                                 | Homo sapiens centriolin (CNTRL), mRNA [NM_007018]                                                             |
| RASAL3    | A_23_P79069   | 3.53E-04 | 7.13  | RAS protein activator like 3                               | Homo sapiens RAS protein activator like 3 (RASAL3), mRNA [NM_022904]                                          |
| CLNK      | A_33_P3267989 | 3.57E-04 | 12.15 | cytokine-dependent hematopoietic cell linker               | Homo sapiens cytokine-dependent hematopoietic cell linker (CLNK), mRNA [NM_052964]                            |
| SMAP2     | A_23_P406330  | 3.83E-04 | 3.91  | small ArfGAP2                                              | Homo sapiens small ArfGAP2 (SMAP2), transcript variant 1, mRNA [NM_022733]                                    |

|         |               |          |       |                                                |                                                                                                             |
|---------|---------------|----------|-------|------------------------------------------------|-------------------------------------------------------------------------------------------------------------|
| CXCL9   | A_23_P18452   | 3.94E-04 | 64.05 | chemokine (C-X-C motif) ligand 9               | Homo sapiens chemokine (C-X-C motif) ligand 9 (CXCL9), mRNA [NM_002416]                                     |
| PTPRC   | A_23_P12392   | 4.01E-04 | 11.10 | protein tyrosine phosphatase, receptor type, C | Homo sapiens protein tyrosine phosphatase, receptor type, C (PTPRC), transcript variant 4, mRNA [NM_080923] |
| CLEC9A  | A_33_P3319022 | 4.01E-04 | 5.85  | C-type lectin domain family 9, member A        | Homo sapiens C-type lectin domain family 9, member A (CLEC9A), mRNA [NM_207345]                             |
| LRRC17  | A_23_P253958  | 4.01E-04 | 5.44  | leucine rich repeat containing 17              | Homo sapiens leucine rich repeat containing 17 (LRRC17), transcript variant 2, mRNA [NM_005824]             |
| PRKCB   | A_23_P420281  | 4.05E-04 | 10.04 | protein kinase C, beta                         | Homo sapiens protein kinase C, beta (PRKCB), transcript variant 2, mRNA [NM_002738]                         |
| FGD3    | A_24_P153840  | 4.17E-04 | 4.91  | FYVE, RhoGEF and PH domain containing 3        | Homo sapiens FYVE, RhoGEF and PH domain containing 3 (FGD3), transcript variant 2, mRNA [NM_033086]         |
| AVEN    | A_23_P100074  | 4.23E-04 | -2.25 | apoptosis, caspase activation inhibitor        | Homo sapiens apoptosis, caspase activation inhibitor (AVEN), mRNA [NM_020371]                               |
| RUNX2   | A_32_P161762  | 4.37E-04 | 5.98  | runt-related transcription factor 2            | Homo sapiens runt-related transcription factor 2 (RUNX2), transcript variant 3, mRNA [NM_004348]            |
| XCL1    | A_24_P45476   | 4.38E-04 | 19.99 | chemokine (C motif) ligand 1                   | Homo sapiens chemokine (C motif) ligand 1 (XCL1), mRNA [NM_002995]                                          |
| PRAM1   | A_33_P3330608 | 4.45E-04 | 5.24  | PML-RARA regulated adaptor molecule 1          | Homo sapiens PML-RARA regulated adaptor molecule 1 (PRAM1), mRNA [NM_032152]                                |
| CCDC88C | A_24_P289170  | 4.45E-04 | 5.06  | coiled-coil domain containing 88C              | Homo sapiens coiled-coil domain containing 88C (CCDC88C), mRNA [NM_001080414]                               |
| EMB     | A_24_P684186  | 4.62E-04 | 6.63  | embigin                                        | Homo sapiens embigin (EMB), mRNA [NM_198449]                                                                |

|           |               |          |       |                                                                                     |                                                                                                                              |
|-----------|---------------|----------|-------|-------------------------------------------------------------------------------------|------------------------------------------------------------------------------------------------------------------------------|
| C2        | A_33_P3404601 | 4.68E-04 | 15.72 | complement component 2                                                              | Homo sapiens complement component 2 (C2), transcript variant 3, mRNA [NM_001178063]                                          |
| FBLIM1    | A_23_P337934  | 4.68E-04 | -2.54 | filamin binding LIM protein 1                                                       | Homo sapiens filamin binding LIM protein 1 (FBLIM1), transcript variant 1, mRNA [NM_017556]                                  |
| GYLTL1B   | A_23_P104617  | 4.95E-04 | -2.55 | glycosyltransferase-like 1B                                                         | Homo sapiens glycosyltransferase-like 1B (GYLTL1B), mRNA [NM_152312]                                                         |
| C1orf105  | A_23_P46584   | 5.24E-04 | -6.89 | chromosome 1 open reading frame 105                                                 | Homo sapiens chromosome 1 open reading frame 105 (C1orf105), mRNA [NM_139240]                                                |
| CD5       | A_33_P3298990 | 5.35E-04 | 20.57 | CD5 molecule                                                                        | Homo sapiens CD5 molecule (CD5), mRNA [NM_014207]                                                                            |
| SUSD3     | A_23_P401076  | 5.47E-04 | 7.21  | sushi domain containing 3                                                           | Homo sapiens sushi domain containing 3 (SUSD3), mRNA [NM_145006]                                                             |
| LOC439949 | A_32_P232559  | 5.76E-04 | 12.66 | uncharacterized LOC439949                                                           | Homo sapiens uncharacterized LOC439949 (LOC439949), transcript variant 1, non-coding RNA [NR_036502]                         |
| APBB1IP   | A_24_P232365  | 5.77E-04 | 6.16  | amyloid beta (A4) precursor protein-binding, family B, member 1 interacting protein | Homo sapiens amyloid beta (A4) precursor protein-binding, family B, member 1 interacting protein (APBB1IP), mRNA [NM_019043] |
| CNIH2     | A_24_P203315  | 5.77E-04 | -3.34 | cornichon homolog 2 (Drosophila)                                                    | Homo sapiens cornichon homolog 2 (Drosophila) (CNIH2), mRNA [NM_182553]                                                      |
| TRIM34    | A_23_P124190  | 5.77E-04 | 2.72  | tripartite motif containing 34                                                      | Homo sapiens tripartite motif containing 34 (TRIM34), transcript variant 3, mRNA [NM_130390]                                 |
| KLRB1     | A_23_P99275   | 5.82E-04 | 17.68 | killer cell lectin-like receptor subfamily B, member 1                              | Homo sapiens killer cell lectin-like receptor subfamily B, member 1 (KLRB1), mRNA [NM_002258]                                |
| CAMK4     | A_23_P250347  | 5.83E-04 | 6.16  | calcium/calmodulin-dependent protein kinase IV                                      | Homo sapiens calcium/calmodulin-dependent protein kinase IV (CAMK4),                                                         |

|              |               |          |       |                                                                      |                                                                                                                                    |
|--------------|---------------|----------|-------|----------------------------------------------------------------------|------------------------------------------------------------------------------------------------------------------------------------|
| DOCK2        | A_24_P408704  | 5.87E-04 | 10.60 | dedicator of cytokinesis 2                                           | mRNA [NM_001744]<br>Homo sapiens dedicator of cytokinesis 2 (DOCK2), mRNA [NM_004946]                                              |
| TXNDC3       | A_23_P259611  | 5.87E-04 | 10.56 | thioredoxin domain containing 3 (spermatozoa)                        | Homo sapiens thioredoxin domain containing 3 (spermatozoa) (TXNDC3), mRNA [NM_016616]                                              |
| TRERF1       | A_23_P59022   | 6.07E-04 | 4.43  | transcriptional regulating factor 1                                  | Homo sapiens transcriptional regulating factor 1 (TRERF1), mRNA [NM_033502]                                                        |
| LOC100130899 | A_33_P3240747 | 6.12E-04 | -4.43 | uncharacterized LOC100130899                                         | Homo sapiens uncharacterized LOC100130899 (LOC100130899), non-coding RNA [NR_039988]                                               |
| ATP2A2       | A_24_P141786  | 6.23E-04 | -3.34 | ATPase, Ca <sup>++</sup> transporting, cardiac muscle, slow twitch 2 | Homo sapiens ATPase, Ca <sup>++</sup> transporting, cardiac muscle, slow twitch 2 (ATP2A2), transcript variant a, mRNA [NM_001681] |
| TMEM79       | A_33_P3320272 | 6.23E-04 | 2.31  | transmembrane protein 79                                             | Homo sapiens transmembrane protein 79 (TMEM79), transcript variant 1, mRNA [NM_032323]                                             |
| LOC728978    | A_32_P52153   | 6.27E-04 | -4.98 | uncharacterized LOC728978                                            | Homo sapiens uncharacterized LOC728978 (LOC728978), non-coding RNA [NR_038453]                                                     |
| LOC727869    | A_32_P110016  | 6.29E-04 | 2.33  | uncharacterized LOC727869                                            | PREDICTED: Homo sapiens hypothetical LOC727869 (LOC727869), miscRNA [XR_111211]                                                    |
| ZNF219       | A_24_P35891   | 6.29E-04 | -2.08 | zinc finger protein 219                                              | Homo sapiens zinc finger protein 219 (ZNF219), transcript variant 1, mRNA [NM_016423]                                              |
| RGS1         | A_23_P97141   | 6.34E-04 | 19.41 | regulator of G-protein signaling 1                                   | Homo sapiens regulator of G-protein signaling 1 (RGS1), mRNA [NM_002922]                                                           |
| RGL4         | A_23_P306941  | 6.64E-04 | 14.09 | ral guanine nucleotide dissociation stimulator-like 4                | Homo sapiens ral guanine nucleotide dissociation stimulator-like 4 (RGL4), mRNA [NM_153615]                                        |
| SNX10        | A_24_P98109   | 6.69E-04 | 9.76  | sorting nexin 10                                                     | Homo sapiens sorting nexin 10 (SNX10),                                                                                             |

|        |               |          |       |                                                              |                                                                                                               |
|--------|---------------|----------|-------|--------------------------------------------------------------|---------------------------------------------------------------------------------------------------------------|
| NCF1   | A_23_P42746   | 6.69E-04 | 9.42  | neutrophil cytosolic factor 1                                | transcript variant 2, mRNA [NM_013322]<br>Homo sapiens neutrophil cytosolic factor 1 (NCF1), mRNA [NM_000265] |
| TRIM14 | A_23_P216655  | 6.69E-04 | 6.84  | tripartite motif containing 14                               | Homo sapiens tripartite motif containing 14 (TRIM14), transcript variant 1, mRNA [NM_014788]                  |
| FCN1   | A_23_P157875  | 6.76E-04 | 13.46 | ficolin (collagen/fibrinogen domain containing) 1            | Homo sapiens ficolin (collagen/fibrinogen domain containing) 1 (FCN1), mRNA [NM_002003]                       |
| SV2C   | A_33_P3314301 | 6.88E-04 | -3.53 | synaptic vesicle glycoprotein 2C                             | Homo sapiens synaptic vesicle glycoprotein 2C (SV2C), mRNA [NM_014979]                                        |
| CORO1A | A_23_P106761  | 6.92E-04 | 4.87  | coronin, actin binding protein, 1A                           | Homo sapiens coronin, actin binding protein, 1A (CORO1A), transcript variant 2, mRNA [NM_007074]              |
| NDC80  | A_23_P50108   | 6.95E-04 | 5.66  | NDC80 homolog, kinetochore complex component (S. cerevisiae) | Homo sapiens NDC80 homolog, kinetochore complex component (S. cerevisiae) (NDC80), mRNA [NM_006101]           |
| IL23A  | A_23_P76078   | 7.08E-04 | 3.23  | interleukin 23, alpha subunit p19                            | Homo sapiens interleukin 23, alpha subunit p19 (IL23A), mRNA [NM_016584]                                      |
| CCR2   | A_23_P212354  | 7.09E-04 | 12.92 | chemokine (C-C motif) receptor 2                             | Homo sapiens chemokine (C-C motif) receptor 2 (CCR2), transcript variant A, mRNA [NM_001123041]               |
| OXER1  | A_33_P3222203 | 7.28E-04 | 2.62  | oxoeicosanoid (OXE) receptor 1                               | Homo sapiens oxoeicosanoid (OXE) receptor 1 (OXER1), mRNA [NM_148962]                                         |
| RBPMS2 | A_23_P100056  | 7.53E-04 | -3.15 | RNA binding protein with multiple splicing 2                 | Homo sapiens RNA binding protein with multiple splicing 2 (RBPMS2), mRNA [NM_194272]                          |
| CCR5   | A_23_P412321  | 7.62E-04 | 13.49 | chemokine (C-C motif) receptor 5                             | Homo sapiens chemokine (C-C motif) receptor 5 (CCR5), transcript variant A,                                   |

|              |               |          |       |                                                          |                                                                                                                       |
|--------------|---------------|----------|-------|----------------------------------------------------------|-----------------------------------------------------------------------------------------------------------------------|
| PPP1R1A      | A_24_P13285   | 7.70E-04 | -4.29 | protein phosphatase 1, regulatory (inhibitor) subunit 1A | mRNA [NM_000579]<br>Homo sapiens protein phosphatase 1, regulatory (inhibitor) subunit 1A (PPP1R1A), mRNA [NM_006741] |
| TRAF1        | A_24_P89891   | 7.95E-04 | 5.10  | TNF receptor-associated factor 1                         | Homo sapiens TNF receptor-associated factor 1 (TRAF1), transcript variant 1, mRNA [NM_005658]                         |
| LOC100130000 | A_33_P3245480 | 7.95E-04 | 4.03  | phosphodiesterase 4D interacting protein pseudogene      | Homo sapiens phosphodiesterase 4D interacting protein pseudogene (LOC100130000), non-coding RNA [NR_033189]           |
| CCDC88B      | A_24_P50950   | 7.97E-04 | 7.07  | coiled-coil domain containing 88B                        | coiled-coil domain containing 88B [Source:HGNC Symbol;Acc:26757] [ENST00000492980]                                    |
| LOC401847    | A_24_P101642  | 8.00E-04 | 37.25 | ig heavy chain V-III region VH26-like                    | PREDICTED: Homo sapiens ig heavy chain V-III region VH26-like (LOC401847), mRNA [XM_001718104]                        |
| CHDH         | A_23_P357185  | 8.00E-04 | -3.08 | choline dehydrogenase                                    | Homo sapiens choline dehydrogenase (CHDH), nuclear gene encoding mitochondrial protein, mRNA [NM_018397]              |
| BLK          | A_23_P31725   | 8.11E-04 | 12.33 | B lymphoid tyrosine kinase                               | Homo sapiens B lymphoid tyrosine kinase (BLK), mRNA [NM_001715]                                                       |
| C14orf182    | A_24_P263910  | 8.11E-04 | 7.04  | chromosome 14 open reading frame 182                     | chromosome 14 open reading frame 182 [Source:HGNC Symbol;Acc:27503] [ENST00000529902]                                 |
| HMHA1        | A_33_P3318414 | 8.16E-04 | 7.70  | histocompatibility (minor) HA-1                          | Homo sapiens histocompatibility (minor) HA-1 (HMHA1), mRNA [NM_012292]                                                |
| ZBTB32       | A_23_P131024  | 8.20E-04 | 9.13  | zinc finger and BTB domain containing 32                 | Homo sapiens zinc finger and BTB domain containing 32 (ZBTB32), mRNA [NM_014383]                                      |
| ARHGDIB      | A_23_P151075  | 8.26E-04 | 2.75  | Rho GDP dissociation inhibitor (GDI) beta                | Homo sapiens Rho GDP dissociation inhibitor (GDI) beta (ARHGDIB), mRNA                                                |

|          |               |          |       |                                                                                  |                                                                                                                            |
|----------|---------------|----------|-------|----------------------------------------------------------------------------------|----------------------------------------------------------------------------------------------------------------------------|
| RTN1     | A_23_P140290  | 8.38E-04 | 7.61  | reticulon 1                                                                      | [NM_001175]<br>Homo sapiens reticulon 1 (RTN1), transcript variant 1, mRNA [NM_021136]                                     |
| LGALS2   | A_23_P120902  | 8.49E-04 | 43.40 | lectin, galactoside-binding, soluble, 2                                          | Homo sapiens lectin, galactoside-binding, soluble, 2 (LGALS2), mRNA [NM_006498]                                            |
| TNFRSF17 | A_23_P37736   | 8.57E-04 | 18.53 | tumor necrosis factor receptor superfamily, member 17                            | Homo sapiens tumor necrosis factor receptor superfamily, member 17 (TNFRSF17), mRNA [NM_001192]                            |
| RLTPR    | A_33_P3294222 | 8.57E-04 | 4.07  | RGD motif, leucine rich repeats, tropomodulin domain and proline-rich containing | Homo sapiens RGD motif, leucine rich repeats, tropomodulin domain and proline-rich containing (RLTPR), mRNA [NM_001013838] |
| DUSP13   | A_23_P104471  | 8.57E-04 | -2.99 | dual specificity phosphatase 13                                                  | Homo sapiens dual specificity phosphatase 13 (DUSP13), transcript variant 1, mRNA [NM_001007271]                           |
| DPEP2    | A_23_P118025  | 8.59E-04 | 9.69  | dipeptidase 2                                                                    | Homo sapiens dipeptidase 2 (DPEP2), mRNA [NM_022355]                                                                       |
| FYB      | A_24_P393740  | 8.71E-04 | 14.77 | FYN binding protein                                                              | Homo sapiens FYN binding protein (FYB), transcript variant 1, mRNA [NM_001465]                                             |
| KIF20B   | A_33_P3215239 | 8.89E-04 | 2.81  | kinesin family member 20B                                                        | Homo sapiens kinesin family member 20B (KIF20B), mRNA [NM_016195]                                                          |
| LRRK2    | A_33_P3369058 | 8.92E-04 | 3.27  | leucine-rich repeat kinase 2                                                     | Homo sapiens leucine-rich repeat kinase 2 (LRRK2), mRNA [NM_198578]                                                        |
| PLXNC1   | A_23_P414958  | 9.02E-04 | 4.36  | plexin C1                                                                        | Homo sapiens plexin C1 (PLXNC1), transcript variant 1, mRNA [NM_005761]                                                    |
| STK4     | A_24_P94054   | 9.12E-04 | 2.48  | serine/threonine kinase 4                                                        | Homo sapiens serine/threonine kinase 4 (STK4), mRNA [NM_006282]                                                            |
| SLAMF8   | A_23_P200138  | 9.27E-04 | 13.51 | SLAM family member 8                                                             | Homo sapiens SLAM family member 8 (SLAMF8), mRNA [NM_020125]                                                               |
| RGS9     | A_23_P66881   | 9.38E-04 | 9.84  | regulator of G-protein signaling 9                                               | Homo sapiens regulator of G-protein signaling 9 (RGS9), transcript variant 1, mRNA [NM_003835]                             |

|           |               |          |       |                                                                                         |                                                                                                                               |
|-----------|---------------|----------|-------|-----------------------------------------------------------------------------------------|-------------------------------------------------------------------------------------------------------------------------------|
| NBPF10    | A_32_P83465   | 9.44E-04 | 2.22  | neuroblastoma breakpoint family, member 10                                              | Homo sapiens neuroblastoma breakpoint family, member 10 (NBPF10), mRNA [NM_001039703]                                         |
| LOC388692 | A_33_P3352887 | 9.61E-04 | 4.39  | uncharacterized LOC388692                                                               | Homo sapiens uncharacterized LOC388692 (LOC388692), non-coding RNA [NR_027002]                                                |
| RBM38     | A_23_P17430   | 9.61E-04 | -2.45 | RNA binding motif protein 38                                                            | Homo sapiens RNA binding motif protein 38 (RBM38), transcript variant 1, mRNA [NM_017495]                                     |
| PTPRU     | A_33_P3309491 | 9.84E-04 | -2.62 | protein tyrosine phosphatase, receptor type, U                                          | Homo sapiens protein tyrosine phosphatase, receptor type, U (PTPRU), transcript variant 3, mRNA [NM_005704]                   |
| GLIS1     | A_23_P316612  | 1.01E-03 | 6.21  | GLIS family zinc finger 1                                                               | Homo sapiens GLIS family zinc finger 1 (GLIS1), mRNA [NM_147193]                                                              |
| RAC2      | A_23_P218770  | 1.02E-03 | 4.14  | ras-related C3 botulinum toxin substrate 2 (rho family, small GTP binding protein Rac2) | Homo sapiens ras-related C3 botulinum toxin substrate 2 (rho family, small GTP binding protein Rac2) (RAC2), mRNA [NM_002872] |
| BATF      | A_23_P128974  | 1.04E-03 | 13.33 | basic leucine zipper transcription factor, ATF-like                                     | Homo sapiens basic leucine zipper transcription factor, ATF-like (BATF), mRNA [NM_006399]                                     |
| PIK3IP1   | A_23_P109488  | 1.06E-03 | 5.57  | phosphoinositide-3-kinase interacting protein 1                                         | Homo sapiens phosphoinositide-3-kinase interacting protein 1 (PIK3IP1), transcript variant 1, mRNA [NM_052880]                |
| GZMK      | A_23_P156218  | 1.08E-03 | 31.71 | granzyme K (granzyme 3; tryptase II)                                                    | Homo sapiens granzyme K (granzyme 3; tryptase II) (GZMK), mRNA [NM_002104]                                                    |
| SELPLG    | A_23_P64860   | 1.09E-03 | 5.55  | selectin P ligand                                                                       | Homo sapiens selectin P ligand (SELPLG), transcript variant 2, mRNA [NM_003006]                                               |
| PIK3CG    | A_33_P3304170 | 1.09E-03 | 5.37  | phosphoinositide-3-kinase, catalytic, gamma polypeptide                                 | Homo sapiens phosphoinositide-3-kinase, catalytic, gamma polypeptide (PIK3CG), mRNA [NM_002649]                               |
| GLYAT     | A_23_P403886  | 1.09E-03 | -2.11 | glycine-N-acyltransferase                                                               | Homo sapiens glycine-N-acyltransferase (GLYAT), nuclear gene encoding                                                         |

|         |               |          |       |                                                                              |                                                                                                                                                                                     |
|---------|---------------|----------|-------|------------------------------------------------------------------------------|-------------------------------------------------------------------------------------------------------------------------------------------------------------------------------------|
| GZMA    | A_33_P3376821 | 1.10E-03 | 24.70 | granzyme A (granzyme 1, cytotoxic T-lymphocyte-associated serine esterase 3) | mitochondrial protein, transcript variant 2, mRNA [NM_005838]<br>Homo sapiens granzyme A (granzyme 1, cytotoxic T-lymphocyte-associated serine esterase 3) (GZMA), mRNA [NM_006144] |
| FERMT2  | A_33_P3344482 | 1.14E-03 | -2.01 | fermitin family member 2                                                     | Homo sapiens fermitin family member 2 (FERMT2), transcript variant 3, mRNA [NM_001135000]                                                                                           |
| CLEC12A | A_23_P128470  | 1.14E-03 | 4.20  | C-type lectin domain family 12, member A                                     | Homo sapiens C-type lectin domain family 12, member A (CLEC12A), transcript variant 1, mRNA [NM_138337]                                                                             |
| FAM113B | A_23_P36888   | 1.14E-03 | 3.56  | family with sequence similarity 113, member B                                | Homo sapiens family with sequence similarity 113, member B (FAM113B), mRNA [NM_138371]                                                                                              |
| PIM2    | A_24_P379104  | 1.18E-03 | 7.45  | pim-2 oncogene                                                               | Homo sapiens pim-2 oncogene (PIM2), mRNA [NM_006875]                                                                                                                                |
| TIFAB   | A_33_P3380383 | 1.23E-03 | 16.91 | TRAF-interacting protein with forkhead-associated domain, family member B    | Homo sapiens TRAF-interacting protein with forkhead-associated domain, family member B (TIFAB), mRNA [NM_001099221]                                                                 |
| RIMBP3  | A_23_P154962  | 1.28E-03 | 5.75  | RIMS binding protein 3                                                       | Homo sapiens RIMS binding protein 3 (RIMBP3), mRNA [NM_015672]                                                                                                                      |
| SLA     | A_23_P216340  | 1.32E-03 | 7.82  | Src-like-adaptor                                                             | Homo sapiens Src-like-adaptor (SLA), transcript variant 1, mRNA [NM_001045556]                                                                                                      |
| ESRRA   | A_23_P1585    | 1.34E-03 | -2.20 | estrogen-related receptor alpha                                              | Homo sapiens estrogen-related receptor alpha (ESRRA), mRNA [NM_004451]                                                                                                              |
| LAT     | A_23_P44112   | 1.35E-03 | 3.64  | linker for activation of T cells                                             | Homo sapiens linker for activation of T cells (LAT), transcript variant 1, mRNA [NM_014387]                                                                                         |
| CDKN3   | A_23_P48669   | 1.38E-03 | -2.39 | cyclin-dependent kinase inhibitor 3                                          | Homo sapiens cyclin-dependent kinase inhibitor 3 (CDKN3), transcript variant 1,                                                                                                     |

|           |               |          |       |                                                            |                                                                                                                                                                                         |
|-----------|---------------|----------|-------|------------------------------------------------------------|-----------------------------------------------------------------------------------------------------------------------------------------------------------------------------------------|
| TRMU      | A_33_P3433156 | 1.41E-03 | -2.17 | tRNA 5-methylaminomethyl-2-thiouridylate methyltransferase | mRNA [NM_005192]<br>Homo sapiens tRNA 5-methylaminomethyl-2-thiouridylate methyltransferase (TRMU), nuclear gene encoding mitochondrial protein, transcript variant 1, mRNA [NM_018006] |
| WNT10A    | A_23_P102117  | 1.42E-03 | 3.54  | wingless-type MMTV integration site family, member 10A     | Homo sapiens wingless-type MMTV integration site family, member 10A (WNT10A), mRNA [NM_025216]                                                                                          |
| CD52      | A_23_P85800   | 1.44E-03 | 10.80 | CD52 molecule                                              | Homo sapiens CD52 molecule (CD52), mRNA [NM_001803]                                                                                                                                     |
| FANCA     | A_23_P206441  | 1.44E-03 | 5.00  | Fanconi anemia, complementation group A                    | Homo sapiens Fanconi anemia, complementation group A (FANCA), transcript variant 1, mRNA [NM_000135]                                                                                    |
| DENND2D   | A_23_P85952   | 1.46E-03 | 6.17  | DENN/MADD domain containing 2D                             | Homo sapiens DENN/MADD domain containing 2D (DENND2D), mRNA [NM_024901]                                                                                                                 |
| LOC401320 | A_33_P3432961 | 1.46E-03 | 2.64  | uncharacterized LOC401320                                  | Homo sapiens uncharacterized LOC401320 (LOC401320), non-coding RNA [NR_038889]                                                                                                          |
| CD226     | A_33_P3413558 | 1.47E-03 | 6.47  | CD226 molecule                                             | Homo sapiens CD226 molecule (CD226), mRNA [NM_006566]                                                                                                                                   |
| FURIN     | A_23_P3368    | 1.47E-03 | -2.29 | furin (paired basic amino acid cleaving enzyme)            | Homo sapiens furin (paired basic amino acid cleaving enzyme) (FURIN), mRNA [NM_002569]                                                                                                  |
| C1orf162  | A_23_P412562  | 1.49E-03 | 4.30  | chromosome 1 open reading frame 162                        | Homo sapiens chromosome 1 open reading frame 162 (C1orf162), mRNA [NM_174896]                                                                                                           |
| FOLH1     | A_23_P47616   | 1.50E-03 | 3.25  | folate hydrolase (prostate-specific membrane antigen) 1    | Homo sapiens folate hydrolase (prostate-specific membrane antigen) 1 (FOLH1), transcript variant 1, mRNA [NM_004476]                                                                    |
| NLRC3     | A_23_P340019  | 1.51E-03 | 7.76  | NLR family, CARD domain                                    | Homo sapiens NLR family, CARD domain                                                                                                                                                    |

|              |               |          |       |                                                     |                                                                                                                   |
|--------------|---------------|----------|-------|-----------------------------------------------------|-------------------------------------------------------------------------------------------------------------------|
|              |               |          |       | containing 3                                        | containing 3 (NLRC3), mRNA [NM_178844]                                                                            |
| SNX20        | A_24_P13831   | 1.51E-03 | 4.30  | sorting nexin 20                                    | Homo sapiens sorting nexin 20 (SNX20), transcript variant 1, mRNA [NM_182854]                                     |
| KBTBD10      | A_23_P17190   | 1.52E-03 | -3.90 | kelch repeat and BTB (POZ) domain containing 10     | Homo sapiens kelch repeat and BTB (POZ) domain containing 10 (KBTBD10), mRNA [NM_006063]                          |
| LOC115110    | A_33_P3242820 | 1.52E-03 | 2.38  | uncharacterized LOC115110                           | Homo sapiens uncharacterized LOC115110 (LOC115110), non-coding RNA [NR_026927]                                    |
| LOC100130811 | A_32_P65589   | 1.54E-03 | 13.61 | ig heavy chain V-I region V35-like                  | PREDICTED: Homo sapiens ig heavy chain V-I region V35-like (LOC100130811), mRNA [XM_003403830]                    |
| RGS18        | A_23_P302550  | 1.55E-03 | 7.37  | regulator of G-protein signaling 18                 | Homo sapiens regulator of G-protein signaling 18 (RGS18), mRNA [NM_130782]                                        |
| MMP25        | A_23_P376557  | 1.56E-03 | 6.09  | matrix metalloproteinase 25                         | Homo sapiens matrix metalloproteinase 25 (MMP25), mRNA [NM_022468]                                                |
| TRIM46       | A_33_P3390778 | 1.58E-03 | 3.58  | tripartite motif containing 46                      | Homo sapiens tripartite motif containing 46 (TRIM46), mRNA [NM_025058]                                            |
| SLIT2        | A_23_P144348  | 1.59E-03 | 2.81  | slit homolog 2 (Drosophila)                         | Homo sapiens slit homolog 2 (Drosophila) (SLIT2), mRNA [NM_004787]                                                |
| MS4A6A       | A_23_P36120   | 1.60E-03 | 5.41  | membrane-spanning 4-domains, subfamily A, member 6A | Homo sapiens membrane-spanning 4-domains, subfamily A, member 6A (MS4A6A), transcript variant 2, mRNA [NM_022349] |
| ADAM8        | A_24_P300777  | 1.62E-03 | 6.70  | ADAM metalloproteinase domain 8                     | Homo sapiens ADAM metalloproteinase domain 8 (ADAM8), transcript variant 1, mRNA [NM_001109]                      |
| FRZB         | A_23_P363778  | 1.62E-03 | 5.88  | frizzled-related protein                            | Homo sapiens frizzled-related protein (FRZB), mRNA [NM_001463]                                                    |

|           |                |          |       |                                                                  |                                                                                                        |
|-----------|----------------|----------|-------|------------------------------------------------------------------|--------------------------------------------------------------------------------------------------------|
| MYO1F     | A_23_P142447   | 1.62E-03 | 5.46  | myosin IF                                                        | Homo sapiens myosin IF (MYO1F), mRNA [NM_012335]                                                       |
| PHF21B    | A_33_P3280666  | 1.63E-03 | -2.38 | PHD finger protein 21B                                           | Homo sapiens PHD finger protein 21B (PHF21B), transcript variant 1, mRNA [NM_138415]                   |
| CCL3L3    | A_24_P228130   | 1.68E-03 | 5.43  | chemokine (C-C motif) ligand 3-like 3                            | Homo sapiens chemokine (C-C motif) ligand 3-like 3 (CCL3L3), mRNA [NM_001001437]                       |
| TMPRSS3   | A_23_P80162    | 1.72E-03 | 2.16  | transmembrane protease, serine 3                                 | Homo sapiens transmembrane protease, serine 3 (TMPRSS3), transcript variant D, mRNA [NM_032405]        |
| MPP2      | A_33_P3360611  | 1.74E-03 | -2.20 | membrane protein, palmitoylated 2 (MAGUK p55 subfamily member 2) | Homo sapiens membrane protein, palmitoylated 2 (MAGUK p55 subfamily member 2) (MPP2), mRNA [NM_005374] |
| ASCL2     | A_32_P171061   | 1.74E-03 | 8.34  | achaete-scute complex homolog 2 (Drosophila)                     | Homo sapiens achaete-scute complex homolog 2 (Drosophila) (ASCL2), mRNA [NM_005170]                    |
| C9orf3    | A_23_P73012    | 1.74E-03 | -2.44 | chromosome 9 open reading frame 3                                | Homo sapiens chromosome 9 open reading frame 3 (C9orf3), transcript variant 2, mRNA [NM_032823]        |
| GTF3A     | A_23_P25525    | 1.74E-03 | -2.05 | general transcription factor IIIA                                | Homo sapiens general transcription factor IIIA (GTF3A), mRNA [NM_002097]                               |
| DQX1      | A_23_P56659    | 1.75E-03 | 2.43  | DEAQ box RNA-dependent ATPase 1                                  | Homo sapiens DEAQ box RNA-dependent ATPase 1 (DQX1), mRNA [NM_133637]                                  |
| CCR7      | A_23_P343398   | 1.76E-03 | 14.70 | chemokine (C-C motif) receptor 7                                 | Homo sapiens chemokine (C-C motif) receptor 7 (CCR7), mRNA [NM_001838]                                 |
| LOC550112 | A_19_P00320846 | 1.79E-03 | 2.74  | uncharacterized LOC550112                                        | Homo sapiens uncharacterized LOC550112 (LOC550112), non-coding RNA [NR_015439]                         |
| BLNK      | A_33_P3363637  | 1.79E-03 | 7.62  | B-cell linker                                                    | Homo sapiens B-cell linker (BLNK), transcript variant 1, mRNA [NM_013314]                              |
| UBD       | A_23_P81898    | 1.84E-03 | 31.26 | ubiquitin D                                                      | Homo sapiens ubiquitin D (UBD), mRNA                                                                   |

|        |               |          |       |                                                         |                                                                                                                                      |
|--------|---------------|----------|-------|---------------------------------------------------------|--------------------------------------------------------------------------------------------------------------------------------------|
| TXNDC5 | A_33_P3270451 | 1.84E-03 | 4.66  | thioredoxin domain containing 5 (endoplasmic reticulum) | [NM_006398]<br>Homo sapiens thioredoxin domain containing 5 (endoplasmic reticulum) (TXNDC5), transcript variant 1, mRNA [NM_030810] |
| IL10RA | A_23_P203173  | 1.86E-03 | 6.28  | interleukin 10 receptor, alpha                          | Homo sapiens interleukin 10 receptor, alpha (IL10RA), transcript variant 1, mRNA [NM_001558]                                         |
| P2RY12 | A_23_P143902  | 1.88E-03 | 5.07  | purinergic receptor P2Y, G-protein coupled, 12          | Homo sapiens purinergic receptor P2Y, G-protein coupled, 12 (P2RY12), transcript variant 1, mRNA [NM_022788]                         |
| HNMT   | A_23_P56734   | 1.89E-03 | 2.54  | histamine N-methyltransferase                           | Homo sapiens histamine N-methyltransferase (HNMT), transcript variant 1, mRNA [NM_006895]                                            |
| DERL3  | A_33_P3724157 | 1.93E-03 | 3.64  | Der1-like domain family, member 3                       | Homo sapiens Der1-like domain family, member 3 (DERL3), transcript variant 3, mRNA [NM_198440]                                       |
| DOCK8  | A_32_P181077  | 1.94E-03 | 5.51  | dedicator of cytokinesis 8                              | Homo sapiens dedicator of cytokinesis 8 (DOCK8), transcript variant 1, mRNA [NM_203447]                                              |
| SOCS1  | A_23_P420196  | 1.97E-03 | 3.93  | suppressor of cytokine signaling 1                      | Homo sapiens suppressor of cytokine signaling 1 (SOCS1), mRNA [NM_003745]                                                            |
| TTYH1  | A_23_P50815   | 1.99E-03 | -2.53 | tweety homolog 1 (Drosophila)                           | Homo sapiens tweety homolog 1 (Drosophila) (TTYH1), transcript variant 1, mRNA [NM_020659]                                           |
| ABI3BP | A_33_P3411975 | 1.99E-03 | 4.60  | ABI family, member 3 (NESH) binding protein             | Homo sapiens ABI family, member 3 (NESH) binding protein (ABI3BP), mRNA [NM_015429]                                                  |
| CD7    | A_33_P3226995 | 1.99E-03 | 9.00  | CD7 molecule                                            | Homo sapiens CD7 molecule (CD7), mRNA [NM_006137]                                                                                    |
| GVINP1 | A_33_P3341616 | 1.99E-03 | 7.80  | GTPase, very large interferon inducible pseudogene 1    | Homo sapiens GTPase, very large interferon inducible pseudogene 1 (GVINP1), non-coding RNA [NR_003945]                               |

|           |               |          |       |                                                                     |                                                                                                                                      |
|-----------|---------------|----------|-------|---------------------------------------------------------------------|--------------------------------------------------------------------------------------------------------------------------------------|
| AKNA      | A_33_P3220047 | 1.99E-03 | 7.01  | AT-hook transcription factor                                        | Homo sapiens AT-hook transcription factor (AKNA), mRNA [NM_030767]                                                                   |
| SLC4A8    | A_33_P3419998 | 1.99E-03 | 5.81  | solute carrier family 4, sodium bicarbonate cotransporter, member 8 | Homo sapiens solute carrier family 4, sodium bicarbonate cotransporter, member 8 (SLC4A8), transcript variant 1, mRNA [NM_001039960] |
| APOBEC3H  | A_32_P347617  | 2.02E-03 | 7.51  | apolipoprotein B mRNA editing enzyme, catalytic polypeptide-like 3H | Homo sapiens apolipoprotein B mRNA editing enzyme, catalytic polypeptide-like 3H (APOBEC3H), transcript variant 2, mRNA [NM_181773]  |
| HEPN1     | A_33_P3298120 | 2.03E-03 | -2.09 | hepatocellular carcinoma, down-regulated 1                          | Homo sapiens hepatocellular carcinoma, down-regulated 1 (HEPN1), mRNA [NM_001037558]                                                 |
| EVI2A     | A_23_P78092   | 2.03E-03 | 6.72  | ecotropic viral integration site 2A                                 | Homo sapiens ecotropic viral integration site 2A (EVI2A), transcript variant 1, mRNA [NM_001003927]                                  |
| SPNS3     | A_23_P100963  | 2.05E-03 | 4.43  | spinster homolog 3 (Drosophila)                                     | Homo sapiens spinster homolog 3 (Drosophila) (SPNS3), mRNA [NM_182538]                                                               |
| PPP2R2B   | A_23_P213620  | 2.06E-03 | 9.74  | protein phosphatase 2, regulatory subunit B, beta                   | Homo sapiens protein phosphatase 2, regulatory subunit B, beta (PPP2R2B), transcript variant 1, mRNA [NM_004576]                     |
| MYH6      | A_23_P37167   | 2.06E-03 | -4.92 | myosin, heavy chain 6, cardiac muscle, alpha                        | Homo sapiens myosin, heavy chain 6, cardiac muscle, alpha (MYH6), mRNA [NM_002471]                                                   |
| LOC651536 | A_33_P3257486 | 2.06E-03 | 4.34  | immunoglobulin omega chain-like                                     | immunoglobulin lambda variable 5-45 [Source:HGNC Symbol;Acc:5924] [ENST00000390296]                                                  |
| DLEC1     | A_23_P18282   | 2.06E-03 | 4.26  | deleted in lung and esophageal cancer 1                             | Homo sapiens deleted in lung and esophageal cancer 1 (DLEC1), transcript variant DLEC1-N1, mRNA [NM_007335]                          |
| CLEC4D    | A_33_P3352578 | 2.08E-03 | 7.89  | C-type lectin domain family 4, member D                             | Homo sapiens C-type lectin domain family 4, member D (CLEC4D), mRNA                                                                  |

|              |                |          |      |                                                                                   |                                                                                                                                        |
|--------------|----------------|----------|------|-----------------------------------------------------------------------------------|----------------------------------------------------------------------------------------------------------------------------------------|
| LCP2         | A_23_P30547    | 2.08E-03 | 4.70 | lymphocyte cytosolic protein 2 (SH2 domain containing leukocyte protein of 76kDa) | [NM_080387]<br>Homo sapiens lymphocyte cytosolic protein 2 (SH2 domain containing leukocyte protein of 76kDa) (LCP2), mRNA [NM_005565] |
| C6orf97      | A_33_P3412087  | 2.10E-03 | 3.95 | chromosome 6 open reading frame 97                                                | Homo sapiens chromosome 6 open reading frame 97 (C6orf97), mRNA [NM_025059]                                                            |
| FAM105A      | A_23_P133438   | 2.11E-03 | 5.51 | family with sequence similarity 105, member A                                     | Homo sapiens family with sequence similarity 105, member A (FAM105A), mRNA [NM_019018]                                                 |
| XLOC_003482  | A_19_P00812050 | 2.13E-03 | 2.20 |                                                                                   | BROAD Institute lincRNA (XLOC_003482), lincRNA [TCONS_00008017]                                                                        |
| CD53         | A_23_P74547    | 2.13E-03 | 8.17 | CD53 molecule                                                                     | Homo sapiens CD53 molecule (CD53), transcript variant 1, mRNA [NM_001040033]                                                           |
| HCLS1        | A_23_P73429    | 2.13E-03 | 4.97 | hematopoietic cell-specific Lyn substrate 1                                       | Homo sapiens hematopoietic cell-specific Lyn substrate 1 (HCLS1), mRNA [NM_005335]                                                     |
| JAKMIP2      | A_33_P3255290  | 2.16E-03 | 5.44 | janus kinase and microtubule interacting protein 2                                | Homo sapiens janus kinase and microtubule interacting protein 2 (JAKMIP2), mRNA [NM_014790]                                            |
| MYO5A        | A_24_P255218   | 2.16E-03 | 2.13 | myosin VA (heavy chain 12, myoxin)                                                | Homo sapiens myosin VA (heavy chain 12, myoxin) (MYO5A), transcript variant 1, mRNA [NM_000259]                                        |
| LOC100132057 | A_32_P515431   | 2.16E-03 | 5.03 | phosphodiesterase 4D interacting protein pseudogene                               | PREDICTED: Homo sapiens hypothetical LOC100132057 (LOC100132057), miscRNA [XR_110830]                                                  |
| XLOC_008370  | A_19_P00315529 | 2.16E-03 | 4.61 |                                                                                   | BROAD Institute lincRNA (XLOC_008370), lincRNA [TCONS_00018105]                                                                        |
| ATP10D       | A_33_P3311473  | 2.16E-03 | 2.89 | ATPase, class V, type 10D                                                         | Homo sapiens ATPase, class V, type 10D                                                                                                 |

|           |               |          |       |                                                                    |                                                                                                                                 |
|-----------|---------------|----------|-------|--------------------------------------------------------------------|---------------------------------------------------------------------------------------------------------------------------------|
| LPAR2     | A_23_P101829  | 2.17E-03 | 6.31  | lysophosphatidic acid receptor 2                                   | (ATP10D), mRNA [NM_020453]<br>Homo sapiens lysophosphatidic acid receptor 2 (LPAR2), mRNA [NM_004720]                           |
| ARHGAP30  | A_33_P3213910 | 2.19E-03 | 3.15  | Rho GTPase activating protein 30                                   | Homo sapiens Rho GTPase activating protein 30 (ARHGAP30), transcript variant 2, mRNA [NM_181720]                                |
| CENPV     | A_23_P313828  | 2.24E-03 | -4.05 | centromere protein V                                               | Homo sapiens centromere protein V (CENPV), mRNA [NM_181716]                                                                     |
| IL7       | A_23_P8961    | 2.24E-03 | 6.23  | interleukin 7                                                      | Homo sapiens interleukin 7 (IL7), transcript variant 1, mRNA [NM_000880]                                                        |
| LRRC8E    | A_24_P348203  | 2.24E-03 | -5.59 | leucine rich repeat containing 8 family, member E                  | Homo sapiens leucine rich repeat containing 8 family, member E (LRRC8E), mRNA [NM_025061]                                       |
| TRPM2     | A_24_P27977   | 2.25E-03 | 3.77  | transient receptor potential cation channel, subfamily M, member 2 | Homo sapiens transient receptor potential cation channel, subfamily M, member 2 (TRPM2), transcript variant 1, mRNA [NM_003307] |
| LOC645769 | A_33_P3418992 | 2.25E-03 | -2.22 | uncharacterized LOC645769                                          | Homo sapiens cDNA FLJ41797 fis, clone NHNPC2000877. [AK123791]                                                                  |
| C16orf54  | A_33_P3227443 | 2.27E-03 | 11.20 | chromosome 16 open reading frame 54                                | Homo sapiens chromosome 16 open reading frame 54 (C16orf54), mRNA [NM_175900]                                                   |
| SYT7      | A_33_P3239185 | 2.29E-03 | -3.28 | synaptotagmin VII                                                  | Homo sapiens synaptotagmin VII (SYT7), transcript variant 1, mRNA [NM_001252065]                                                |
| GFRA2     | A_33_P3317580 | 2.30E-03 | 3.40  | GDNF family receptor alpha 2                                       | Homo sapiens GDNF family receptor alpha 2 (GFRA2), transcript variant 1, mRNA [NM_001495]                                       |
| CORO2A    | A_23_P135061  | 2.34E-03 | 3.97  | coronin, actin binding protein, 2A                                 | Homo sapiens coronin, actin binding protein, 2A (CORO2A), transcript variant 1, mRNA [NM_003389]                                |
| BTLA      | A_33_P3358923 | 2.37E-03 | 8.62  | B and T lymphocyte associated                                      | Homo sapiens B and T lymphocyte associated (BTLA), transcript variant 1,                                                        |

|         |               |          |       |                                                                        |                                                                                                                                       |
|---------|---------------|----------|-------|------------------------------------------------------------------------|---------------------------------------------------------------------------------------------------------------------------------------|
| FGD2    | A_24_P140788  | 2.38E-03 | 3.67  | FYVE, RhoGEF and PH domain containing 2                                | mRNA [NM_181780]<br>Homo sapiens FYVE, RhoGEF and PH domain containing 2 (FGD2), mRNA [NM_173558]                                     |
| LAMA4   | A_33_P3391596 | 2.38E-03 | -2.86 | laminin, alpha 4                                                       | Homo sapiens laminin, alpha 4 (LAMA4), transcript variant 1, mRNA [NM_001105206]                                                      |
| FAM26F  | A_23_P7827    | 2.39E-03 | 11.76 | family with sequence similarity 26, member F                           | Homo sapiens family with sequence similarity 26, member F (FAM26F), mRNA [NM_001010919]                                               |
| SLC16A6 | A_23_P152791  | 2.41E-03 | 6.97  | solute carrier family 16, member 6 (monocarboxylic acid transporter 7) | Homo sapiens solute carrier family 16, member 6 (monocarboxylic acid transporter 7) (SLC16A6), transcript variant 2, mRNA [NM_004694] |
| PPP1CC  | A_23_P204423  | 2.41E-03 | -2.02 | protein phosphatase 1, catalytic subunit, gamma isozyme                | Homo sapiens protein phosphatase 1, catalytic subunit, gamma isozyme (PPP1CC), transcript variant 1, mRNA [NM_002710]                 |
| OCIAD2  | A_23_P121702  | 2.45E-03 | -2.11 | OCIA domain containing 2                                               | Homo sapiens OCIA domain containing 2 (OCIAD2), transcript variant 1, mRNA [NM_001014446]                                             |
| IPCEF1  | A_33_P3397995 | 2.45E-03 | 6.41  | interaction protein for cytohesin exchange factors 1                   | Homo sapiens interaction protein for cytohesin exchange factors 1 (IPCEF1), transcript variant 1, mRNA [NM_001130699]                 |
| ANGPT1  | A_23_P216023  | 2.48E-03 | 4.04  | angiopoietin 1                                                         | Homo sapiens angiopoietin 1 (ANGPT1), transcript variant 1, mRNA [NM_001146]                                                          |
| NELL2   | A_23_P10025   | 2.51E-03 | 9.52  | NEL-like 2 (chicken)                                                   | Homo sapiens NEL-like 2 (chicken) (NELL2), transcript variant 2, mRNA [NM_006159]                                                     |
| TNNI2   | A_23_P24784   | 2.51E-03 | 3.58  | troponin I type 2 (skeletal, fast)                                     | Homo sapiens troponin I type 2 (skeletal, fast) (TNNI2), transcript variant 1, mRNA [NM_003282]                                       |

|         |               |          |       |                                                                                                |                                                                                                                            |
|---------|---------------|----------|-------|------------------------------------------------------------------------------------------------|----------------------------------------------------------------------------------------------------------------------------|
| GRIK3   | A_33_P3246553 | 2.51E-03 | -2.13 | glutamate receptor, ionotropic, kainate 3                                                      | Homo sapiens glutamate receptor, ionotropic, kainate 3 (GRIK3), mRNA [NM_000831]                                           |
| SASH3   | A_24_P237443  | 2.52E-03 | 7.32  | SAM and SH3 domain containing 3                                                                | Homo sapiens SAM and SH3 domain containing 3 (SASH3), mRNA [NM_018990]                                                     |
| ACP5    | A_23_P142075  | 2.54E-03 | 7.31  | acid phosphatase 5, tartrate resistant                                                         | Homo sapiens acid phosphatase 5, tartrate resistant (ACP5), transcript variant 4, mRNA [NM_001611]                         |
| LRMP    | A_23_P98910   | 2.54E-03 | 4.73  | lymphoid-restricted membrane protein                                                           | Homo sapiens lymphoid-restricted membrane protein (LRMP), transcript variant 1, mRNA [NM_006152]                           |
| SCARNA2 | A_33_P3273584 | 2.54E-03 | 3.25  | small Cajal body-specific RNA 2                                                                | Homo sapiens small Cajal body-specific RNA 2 (SCARNA2), guide RNA [NR_003023]                                              |
| RTN4RL1 | A_23_P432056  | 2.56E-03 | -5.18 | reticulon 4 receptor-like 1                                                                    | Homo sapiens reticulon 4 receptor-like 1 (RTN4RL1), mRNA [NM_178568]                                                       |
| C2orf89 | A_23_P255896  | 2.64E-03 | 2.82  | chromosome 2 open reading frame 89                                                             | Homo sapiens chromosome 2 open reading frame 89 (C2orf89), mRNA [NM_001080824]                                             |
| P2RY14  | A_24_P165864  | 2.69E-03 | 2.65  | purinergic receptor P2Y, G-protein coupled, 14                                                 | Homo sapiens purinergic receptor P2Y, G-protein coupled, 14 (P2RY14), transcript variant 2, mRNA [NM_014879]               |
| SP140L  | A_23_P337753  | 2.76E-03 | 3.30  | SP140 nuclear body protein-like                                                                | Homo sapiens SP140 nuclear body protein-like (SP140L), mRNA [NM_138402]                                                    |
| PTK2    | A_33_P3416707 | 2.81E-03 | -3.30 | PTK2 protein tyrosine kinase 2                                                                 | PTK2 protein tyrosine kinase 2 [Source:HGNC Symbol;Acc:9611] [ENST00000342207]                                             |
| GALNT6  | A_33_P3215768 | 2.82E-03 | 7.89  | UDP-N-acetyl-alpha-D-galactosamine:polypeptide N-acetylgalactosaminyltransferase 6 (GalNAc-T6) | Homo sapiens UDP-N-acetyl-alpha-D-galactosamine:polypeptide N-acetylgalactosaminyltransferase 6 (GalNAc-T6) (GALNT6), mRNA |

|              |               |          |       |                                                                                                                  |                                                                                                                                                                                |
|--------------|---------------|----------|-------|------------------------------------------------------------------------------------------------------------------|--------------------------------------------------------------------------------------------------------------------------------------------------------------------------------|
| LCN9         | A_33_P3423931 | 2.84E-03 | -3.44 | lipocalin 9                                                                                                      | [NM_007210]<br>Homo sapiens lipocalin 9 (LCN9), mRNA [NM_001001676]                                                                                                            |
| ERP27        | A_23_P139687  | 2.85E-03 | 4.08  | endoplasmic reticulum protein 27                                                                                 | Homo sapiens endoplasmic reticulum protein 27 (ERP27), mRNA [NM_152321]                                                                                                        |
| EGLN1        | A_23_P343935  | 2.86E-03 | -2.08 | egl nine homolog 1 (C. elegans)                                                                                  | Homo sapiens egl nine homolog 1 (C. elegans) (EGLN1), mRNA [NM_022051]                                                                                                         |
| LOC100131096 | A_24_P857624  | 2.87E-03 | 3.09  | uncharacterized LOC100131096                                                                                     | Homo sapiens uncharacterized LOC100131096 (LOC100131096), non-coding RNA [NR_040071]                                                                                           |
| GRAP2        | A_24_P10884   | 2.89E-03 | 2.39  | GRB2-related adaptor protein 2                                                                                   | Homo sapiens GRB2-related adaptor protein 2 (GRAP2), mRNA [NM_004810]                                                                                                          |
| GPR18        | A_23_P14165   | 2.91E-03 | 5.53  | G protein-coupled receptor 18                                                                                    | Homo sapiens G protein-coupled receptor 18 (GPR18), transcript variant 1, mRNA [NM_005292]                                                                                     |
| SEMA4D       | A_24_P261169  | 3.00E-03 | 8.82  | sema domain, immunoglobulin domain (Ig), transmembrane domain (TM) and short cytoplasmic domain, (semaphorin) 4D | Homo sapiens sema domain, immunoglobulin domain (Ig), transmembrane domain (TM) and short cytoplasmic domain, (semaphorin) 4D (SEMA4D), transcript variant 1, mRNA [NM_006378] |
| PTGDR        | A_23_P393777  | 3.00E-03 | 5.17  | prostaglandin D2 receptor (DP)                                                                                   | Homo sapiens prostaglandin D2 receptor (DP) (PTGDR), mRNA [NM_000953]                                                                                                          |
| LAIR2        | A_23_P209129  | 3.00E-03 | 4.39  | leukocyte-associated immunoglobulin-like receptor 2                                                              | Homo sapiens leukocyte-associated immunoglobulin-like receptor 2 (LAIR2), transcript variant 1, mRNA [NM_002288]                                                               |
| SLC9A9       | A_32_P46214   | 3.00E-03 | 2.84  | solute carrier family 9 (sodium/hydrogen exchanger), member 9                                                    | Homo sapiens solute carrier family 9 (sodium/hydrogen exchanger), member 9 (SLC9A9), mRNA [NM_173653]                                                                          |
| FAM117B      | A_32_P195401  | 3.00E-03 | 2.99  | family with sequence similarity 117, member B                                                                    | Homo sapiens family with sequence similarity 117, member B (FAM117B), mRNA [NM_173511]                                                                                         |
| GPR160       | A_23_P167005  | 3.01E-03 | 2.68  | G protein-coupled receptor 160                                                                                   | Homo sapiens G protein-coupled                                                                                                                                                 |

|          |               |          |       |                                                           |                                                                                                                                |
|----------|---------------|----------|-------|-----------------------------------------------------------|--------------------------------------------------------------------------------------------------------------------------------|
| ERMN     | A_23_P102017  | 3.07E-03 | 4.17  | ermin, ERM-like protein                                   | receptor 160 (GPR160), mRNA [NM_014373]<br>Homo sapiens ermin, ERM-like protein (ERMN), transcript variant 2, mRNA [NM_020711] |
| SIGLEC10 | A_23_P208182  | 3.08E-03 | 9.70  | sialic acid binding Ig-like lectin 10                     | Homo sapiens sialic acid binding Ig-like lectin 10 (SIGLEC10), transcript variant 1, mRNA [NM_033130]                          |
| WDR54    | A_23_P68072   | 3.12E-03 | 2.65  | WD repeat domain 54                                       | Homo sapiens WD repeat domain 54 (WDR54), mRNA [NM_032118]                                                                     |
| H2AFZ    | A_24_P41570   | 3.12E-03 | -2.08 | H2A histone family, member Z                              | Homo sapiens H2A histone family, member Z (H2AFZ), mRNA [NM_002106]                                                            |
| WDFY4    | A_32_P30905   | 3.13E-03 | 7.47  | WDFY family member 4                                      | Homo sapiens WDFY family member 4 (WDFY4), mRNA [NM_020945]                                                                    |
| PTK2B    | A_33_P3351536 | 3.13E-03 | 3.35  | PTK2B protein tyrosine kinase 2 beta                      | Homo sapiens PTK2B protein tyrosine kinase 2 beta (PTK2B), transcript variant 1, mRNA [NM_173174]                              |
| ATXN7L1  | A_32_P179740  | 3.15E-03 | 2.35  | ataxin 7-like 1                                           | Homo sapiens ataxin 7-like 1 (ATXN7L1), transcript variant 1, mRNA [NM_020725]                                                 |
| TRIM59   | A_32_P72341   | 3.16E-03 | 4.76  | tripartite motif containing 59                            | Homo sapiens tripartite motif containing 59 (TRIM59), mRNA [NM_173084]                                                         |
| CYSLTR1  | A_23_P22660   | 3.23E-03 | 2.78  | cysteinyl leukotriene receptor 1                          | Homo sapiens cysteinyl leukotriene receptor 1 (CYSLTR1), mRNA [NM_006639]                                                      |
| NCR3     | A_23_P251881  | 3.25E-03 | 12.32 | natural cytotoxicity triggering receptor 3                | Homo sapiens natural cytotoxicity triggering receptor 3 (NCR3), transcript variant 1, mRNA [NM_147130]                         |
| BTN3A1   | A_33_P3388466 | 3.27E-03 | 3.96  | butyrophilin, subfamily 3, member A1                      | Homo sapiens butyrophilin, subfamily 3, member A1 (BTN3A1), transcript variant 1, mRNA [NM_007048]                             |
| ARAP2    | A_32_P83784   | 3.28E-03 | 4.85  | ArfGAP with RhoGAP domain, ankyrin repeat and PH domain 2 | Homo sapiens ArfGAP with RhoGAP domain, ankyrin repeat and PH domain 2 (ARAP2), mRNA [NM_015230]                               |

|          |               |          |       |                                                                             |                                                                                                                                                                                        |
|----------|---------------|----------|-------|-----------------------------------------------------------------------------|----------------------------------------------------------------------------------------------------------------------------------------------------------------------------------------|
| CSF1R    | A_23_P110791  | 3.28E-03 | 4.70  | colony stimulating factor 1 receptor                                        | Homo sapiens colony stimulating factor 1 receptor (CSF1R), mRNA [NM_005211]                                                                                                            |
| LY75     | A_23_P334173  | 3.35E-03 | 7.26  | lymphocyte antigen 75                                                       | Homo sapiens lymphocyte antigen 75 (LY75), mRNA [NM_002349]                                                                                                                            |
| SPEF2    | A_33_P3407400 | 3.35E-03 | 4.95  | sperm flagellar 2                                                           | Homo sapiens sperm flagellar 2 (SPEF2), transcript variant 2, mRNA [NM_144722]                                                                                                         |
| CD79A    | A_23_P107735  | 3.38E-03 | -4.04 | CD79a molecule, immunoglobulin-associated alpha                             | Homo sapiens CD79a molecule, immunoglobulin-associated alpha (CD79A), transcript variant 1, mRNA [NM_001783]                                                                           |
| CD59     | A_24_P784765  | 3.38E-03 | -2.38 | CD59 molecule, complement regulatory protein                                | Homo sapiens CD59 molecule, complement regulatory protein (CD59), transcript variant 1, mRNA [NM_203330]                                                                               |
| GNMT     | A_23_P7957    | 3.40E-03 | -6.18 | glycine N-methyltransferase                                                 | Homo sapiens glycine N-methyltransferase (GNMT), mRNA [NM_018960]                                                                                                                      |
| SRCIN1   | A_32_P201530  | 3.40E-03 | 5.01  | SRC kinase signaling inhibitor 1                                            | Homo sapiens SRC kinase signaling inhibitor 1 (SRCIN1), mRNA [NM_025248]                                                                                                               |
| SLC9B1   | A_23_P415611  | 3.40E-03 | 4.12  | solute carrier family 9, subfamily B (cation proton antiporter 2), member 1 | Homo sapiens solute carrier family 9, subfamily B (cation proton antiporter 2), member 1 (SLC9B1), nuclear gene encoding mitochondrial protein, transcript variant 1, mRNA [NM_139173] |
| MET      | A_23_P359245  | 3.40E-03 | -2.49 | met proto-oncogene (hepatocyte growth factor receptor)                      | Homo sapiens met proto-oncogene (hepatocyte growth factor receptor) (MET), transcript variant 2, mRNA [NM_000245]                                                                      |
| C17orf87 | A_33_P3379268 | 3.42E-03 | 5.19  | chromosome 17 open reading frame 87                                         | Homo sapiens chromosome 17 open reading frame 87 (C17orf87), mRNA [NM_207103]                                                                                                          |
| GTPBP6   | A_24_P358381  | 3.43E-03 | -2.21 | GTP binding protein 6 (putative)                                            | Homo sapiens GTP binding protein 6 (putative) (GTPBP6), mRNA                                                                                                                           |

|              |               |          |       |                                                                   |                                                                                                               |
|--------------|---------------|----------|-------|-------------------------------------------------------------------|---------------------------------------------------------------------------------------------------------------|
| LOC100128670 | A_33_P3366754 | 3.46E-03 | 9.75  | uncharacterized LOC100128670                                      | [NM_012227]<br>Homo sapiens cDNA FLJ44998 fis, clone BRAWH3010833. [AK126945]                                 |
| E2F8         | A_23_P35871   | 3.46E-03 | -5.34 | E2F transcription factor 8                                        | Homo sapiens E2F transcription factor 8 (E2F8), mRNA [NM_024680]                                              |
| CCL28        | A_23_P503072  | 3.46E-03 | 4.51  | chemokine (C-C motif) ligand 28                                   | Homo sapiens chemokine (C-C motif) ligand 28 (CCL28), mRNA [NM_148672]                                        |
| ANO9         | A_24_P8109    | 3.46E-03 | 3.44  | anoctamin 9                                                       | Homo sapiens anoctamin 9 (ANO9), mRNA [NM_001012302]                                                          |
| OSBPL7       | A_33_P3358740 | 3.46E-03 | 2.34  | oxysterol binding protein-like 7                                  | Homo sapiens oxysterol binding protein-like 7 (OSBPL7), transcript variant 1, mRNA [NM_145798]                |
| LINC00239    | A_32_P176911  | 3.47E-03 | 7.26  | long intergenic non-protein coding RNA 239                        | Homo sapiens long intergenic non-protein coding RNA 239 (LINC00239), non-coding RNA [NR_026774]               |
| IRF4         | A_23_P214360  | 3.49E-03 | 5.96  | interferon regulatory factor 4                                    | Homo sapiens interferon regulatory factor 4 (IRF4), transcript variant 1, mRNA [NM_002460]                    |
| NCK2         | A_33_P3268564 | 3.49E-03 | 3.01  | NCK adaptor protein 2                                             | Homo sapiens NCK adaptor protein 2 (NCK2), transcript variant 3, mRNA [NM_001004722]                          |
| C12orf35     | A_23_P98930   | 3.49E-03 | 2.53  | chromosome 12 open reading frame 35                               | Homo sapiens chromosome 12 open reading frame 35 (C12orf35), mRNA [NM_018169]                                 |
| PIK3R5       | A_23_P66543   | 3.50E-03 | 2.70  | phosphoinositide-3-kinase, regulatory subunit 5                   | Homo sapiens phosphoinositide-3-kinase, regulatory subunit 5 (PIK3R5), transcript variant 2, mRNA [NM_014308] |
| LCP1         | A_23_P204847  | 3.51E-03 | 7.53  | lymphocyte cytosolic protein 1 (L-plastin)                        | Homo sapiens lymphocyte cytosolic protein 1 (L-plastin) (LCP1), mRNA [NM_002298]                              |
| SLC5A10      | A_33_P3210418 | 3.52E-03 | -2.08 | solute carrier family 5 (sodium/glucose cotransporter), member 10 | Homo sapiens solute carrier family 5 (sodium/glucose cotransporter), member 10 (SLC5A10), transcript variant  |

|              |                |          |       |                                                           |                                                                                                                     |
|--------------|----------------|----------|-------|-----------------------------------------------------------|---------------------------------------------------------------------------------------------------------------------|
| NPPA         | A_33_P3323699  | 3.56E-03 | -2.12 | natriuretic peptide A                                     | 1, mRNA [NM_152351]<br>natriuretic peptide A [Source:HGNC<br>Symbol;Acc:7939] [ENST00000376476]                     |
| GPC6         | A_23_P371682   | 3.56E-03 | 4.05  | glypican 6                                                | Homo sapiens glypican 6 (GPC6), mRNA<br>[NM_005708]                                                                 |
| PSD4         | A_23_P68121    | 3.61E-03 | 4.38  | pleckstrin and Sec7 domain<br>containing 4                | Homo sapiens pleckstrin and Sec7<br>domain containing 4 (PSD4), mRNA<br>[NM_012455]                                 |
| GPR126       | A_24_P411749   | 3.61E-03 | 3.73  | G protein-coupled receptor 126                            | Homo sapiens G protein-coupled<br>receptor 126 (GPR126), transcript<br>variant a1, mRNA [NM_020455]                 |
| LOC100506047 | A_19_P00320407 | 3.66E-03 | 3.10  |                                                           | PREDICTED: Homo sapiens hypothetical<br>LOC100506047 (LOC100506047),<br>miscRNA [XR_109976]                         |
| C12orf75     | A_32_P163089   | 3.69E-03 | 4.71  | chromosome 12 open reading<br>frame 75                    | Homo sapiens chromosome 12 open<br>reading frame 75 (C12orf75), mRNA<br>[NM_001145199]                              |
| DLEU1        | A_23_P151337   | 3.80E-03 | -2.01 | deleted in lymphocytic leukemia<br>1 (non-protein coding) | Homo sapiens deleted in lymphocytic<br>leukemia 1 (non-protein coding)<br>(DLEU1), non-coding RNA [NR_002605]       |
| MS4A4E       | A_33_P3402269  | 3.82E-03 | 4.57  | membrane-spanning 4-domains,<br>subfamily A, member 4E    | PREDICTED: Homo sapiens membrane-<br>spanning 4-domains, subfamily A,<br>member 4E (MS4A4E), mRNA<br>[XM_003119183] |
| CCDC65       | A_23_P47904    | 3.82E-03 | 3.14  | coiled-coil domain containing 65                          | Homo sapiens coiled-coil domain<br>containing 65 (CCDC65), mRNA<br>[NM_033124]                                      |
| CTLA4        | A_33_P3396139  | 3.83E-03 | 10.68 | cytotoxic T-lymphocyte-<br>associated protein 4           | Homo sapiens cytotoxic T-lymphocyte-<br>associated protein 4 (CTLA4), transcript<br>variant 1, mRNA [NM_005214]     |
| FAM65B       | A_24_P941359   | 3.83E-03 | 4.27  | family with sequence similarity<br>65, member B           | Homo sapiens family with sequence<br>similarity 65, member B (FAM65B),<br>transcript variant 1, mRNA [NM_014722]    |

|           |                |          |       |                                                                     |                                                                                                               |
|-----------|----------------|----------|-------|---------------------------------------------------------------------|---------------------------------------------------------------------------------------------------------------|
| PARVG     | A_23_P250413   | 3.85E-03 | 5.10  | parvin, gamma                                                       | Homo sapiens parvin, gamma (PARVG), transcript variant 1, mRNA [NM_022141]                                    |
| ITGAD     | A_23_P129665   | 3.86E-03 | 13.92 | integrin, alpha D                                                   | Homo sapiens integrin, alpha D (ITGAD), mRNA [NM_005353]                                                      |
| LIG1      | A_23_P39116    | 3.86E-03 | 2.20  | ligase I, DNA, ATP-dependent                                        | Homo sapiens ligase I, DNA, ATP-dependent (LIG1), mRNA [NM_000234]                                            |
| UTP11L    | A_23_P11774    | 3.86E-03 | -2.03 | UTP11-like, U3 small nucleolar ribonucleoprotein, (yeast)           | Homo sapiens UTP11-like, U3 small nucleolar ribonucleoprotein, (yeast) (UTP11L), mRNA [NM_016037]             |
| BHLHE22   | A_32_P75581    | 3.86E-03 | 7.48  | basic helix-loop-helix family, member e22                           | Homo sapiens basic helix-loop-helix family, member e22 (BHLHE22), mRNA [NM_152414]                            |
| PLD4      | A_23_P88222    | 3.94E-03 | 2.85  | phospholipase D family, member 4                                    | Homo sapiens phospholipase D family, member 4 (PLD4), mRNA [NM_138790]                                        |
| LOC389602 | A_19_P00317444 | 4.10E-03 | -3.02 | uncharacterized LOC389602                                           | PREDICTED: Homo sapiens hypothetical LOC389602 (LOC389602), miscRNA [XR_108709]                               |
| ZNF226    | A_23_P395555   | 4.11E-03 | 2.05  | zinc finger protein 226                                             | Homo sapiens zinc finger protein 226 (ZNF226), transcript variant 1, mRNA [NM_001032372]                      |
| DPT       | A_23_P200741   | 4.12E-03 | 3.50  | dermatopontin                                                       | Homo sapiens dermatopontin (DPT), mRNA [NM_001937]                                                            |
| DAPP1     | A_23_P255444   | 4.13E-03 | 7.74  | dual adaptor of phosphotyrosine and 3-phosphoinositides             | Homo sapiens dual adaptor of phosphotyrosine and 3-phosphoinositides (DAPP1), mRNA [NM_014395]                |
| APOBEC3D  | A_23_P132316   | 4.16E-03 | 3.51  | apolipoprotein B mRNA editing enzyme, catalytic polypeptide-like 3D | Homo sapiens apolipoprotein B mRNA editing enzyme, catalytic polypeptide-like 3D (APOBEC3D), mRNA [NM_152426] |
| SCGB1D1   | A_23_P127781   | 4.17E-03 | -8.22 | secretoglobin, family 1D, member 1                                  | Homo sapiens secretoglobin, family 1D, member 1 (SCGB1D1), mRNA [NM_006552]                                   |

|           |               |          |        |                                                                         |                                                                                                               |
|-----------|---------------|----------|--------|-------------------------------------------------------------------------|---------------------------------------------------------------------------------------------------------------|
| GTSF1     | A_33_P3388192 | 4.17E-03 | 6.75   | gametocyte specific factor 1                                            | Homo sapiens gametocyte specific factor 1 (GTSF1), mRNA [NM_144594]                                           |
| LST1      | A_24_P103469  | 4.17E-03 | 4.52   | leukocyte specific transcript 1                                         | Homo sapiens leukocyte specific transcript 1 (LST1), transcript variant 1, mRNA [NM_007161]                   |
| FAM160A1  | A_33_P3381318 | 4.17E-03 | -3.72  | family with sequence similarity 160, member A1                          | Homo sapiens family with sequence similarity 160, member A1 (FAM160A1), mRNA [NM_001109977]                   |
| ARRDC5    | A_32_P30271   | 4.18E-03 | 5.65   | arrestin domain containing 5                                            | Homo sapiens arrestin domain containing 5 (ARRDC5), mRNA [NM_001080523]                                       |
| FUT4      | A_33_P3286536 | 4.21E-03 | 2.24   | fucosyltransferase 4 (alpha (1,3) fucosyltransferase, myeloid-specific) | Homo sapiens fucosyltransferase 4 (alpha (1,3) fucosyltransferase, myeloid-specific) (FUT4), mRNA [NM_002033] |
| LINC00158 | A_23_P132057  | 4.26E-03 | 3.16   | long intergenic non-protein coding RNA 158                              | Homo sapiens long intergenic non-protein coding RNA 158 (LINC00158), non-coding RNA [NR_024027]               |
| BMP7      | A_23_P68487   | 4.33E-03 | -15.87 | bone morphogenetic protein 7                                            | Homo sapiens bone morphogenetic protein 7 (BMP7), mRNA [NM_001719]                                            |
| CEBPE     | A_33_P3387991 | 4.33E-03 | 3.87   | CCAAT/enhancer binding protein (C/EBP), epsilon                         | Homo sapiens CCAAT/enhancer binding protein (C/EBP), epsilon (CEBPE), mRNA [NM_001805]                        |
| EAF2      | A_23_P252201  | 4.34E-03 | 2.68   | ELL associated factor 2                                                 | Homo sapiens ELL associated factor 2 (EAF2), mRNA [NM_018456]                                                 |
| RAB30     | A_24_P167338  | 4.34E-03 | 2.04   | RAB30, member RAS oncogene family                                       | Homo sapiens RAB30, member RAS oncogene family (RAB30), mRNA [NM_014488]                                      |
| NAAA      | A_33_P3297217 | 4.34E-03 | 2.14   | N-acylethanolamine acid amidase                                         | Homo sapiens N-acylethanolamine acid amidase (NAAA), transcript variant 2, mRNA [NM_001042402]                |
| C20orf85  | A_23_P314835  | 4.37E-03 | -2.17  | chromosome 20 open reading frame 85                                     | Homo sapiens chromosome 20 open reading frame 85 (C20orf85), mRNA [NM_178456]                                 |

|           |               |          |       |                                                |                                                                                                               |
|-----------|---------------|----------|-------|------------------------------------------------|---------------------------------------------------------------------------------------------------------------|
| C5orf20   | A_23_P81441   | 4.39E-03 | 11.06 | chromosome 5 open reading frame 20             | Homo sapiens chromosome 5 open reading frame 20 (C5orf20), mRNA [NM_130848]                                   |
| ADORA3    | A_23_P137931  | 4.42E-03 | 6.42  | adenosine A3 receptor                          | Homo sapiens adenosine A3 receptor (ADORA3), transcript variant 2, mRNA [NM_000677]                           |
| FER1L4    | A_23_P80048   | 4.44E-03 | 9.84  | fer-1-like 4 (C. elegans) pseudogene           | Homo sapiens fer-1-like 4 (C. elegans) pseudogene (FER1L4), non-coding RNA [NR_024377]                        |
| TIGIT     | A_33_P3235213 | 4.44E-03 | 5.92  | T cell immunoreceptor with Ig and ITIM domains | Homo sapiens T cell immunoreceptor with Ig and ITIM domains (TIGIT), mRNA [NM_173799]                         |
| NHLRC3    | A_32_P129950  | 4.47E-03 | 2.03  | NHL repeat containing 3                        | Homo sapiens NHL repeat containing 3 (NHLRC3), transcript variant 1, mRNA [NM_001012754]                      |
| LOC283710 | A_33_P3336587 | 4.48E-03 | 9.71  | uncharacterized LOC283710                      | Homo sapiens uncharacterized LOC283710 (LOC283710), mRNA [NM_001243538]                                       |
| CXorf21   | A_23_P62227   | 4.48E-03 | 5.02  | chromosome X open reading frame 21             | Homo sapiens chromosome X open reading frame 21 (CXorf21), mRNA [NM_025159]                                   |
| GCNT1     | A_33_P3282489 | 4.48E-03 | 3.98  | glucosaminyl (N-acetyl) transferase 1, core 2  | Homo sapiens glucosaminyl (N-acetyl) transferase 1, core 2 (GCNT1), transcript variant 1, mRNA [NM_001097634] |
| CDCA2     | A_23_P385861  | 4.48E-03 | -7.81 | cell division cycle associated 2               | Homo sapiens cell division cycle associated 2 (CDCA2), mRNA [NM_152562]                                       |
| FAM72D    | A_32_P151800  | 4.48E-03 | 5.50  | family with sequence similarity 72, member D   | Homo sapiens family with sequence similarity 72, member D (FAM72D), mRNA [NM_207418]                          |
| OLFML1    | A_23_P147665  | 4.52E-03 | 2.35  | olfactomedin-like 1                            | Homo sapiens olfactomedin-like 1 (OLFML1), mRNA [NM_198474]                                                   |
| QPCT      | A_24_P71468   | 4.54E-03 | 4.32  | glutaminy-peptide                              | Homo sapiens glutaminy-peptide                                                                                |

|           |               |          |       |                                                               |                                                                                                                             |
|-----------|---------------|----------|-------|---------------------------------------------------------------|-----------------------------------------------------------------------------------------------------------------------------|
|           |               |          |       | cyclotransferase                                              | cyclotransferase (QPCT), mRNA [NM_012413]                                                                                   |
| PPYR1     | A_24_P364042  | 4.54E-03 | -3.92 | pancreatic polypeptide receptor 1                             | Homo sapiens pancreatic polypeptide receptor 1 (PPYR1), mRNA [NM_005972]                                                    |
| KCNJ15    | A_33_P3267532 | 4.56E-03 | -2.43 | potassium inwardly-rectifying channel, subfamily J, member 15 | Homo sapiens potassium inwardly-rectifying channel, subfamily J, member 15 (KCNJ15), transcript variant 1, mRNA [NM_170736] |
| NRK       | A_33_P3248405 | 4.58E-03 | 10.13 | Nik related kinase                                            | Nik related kinase [Source:HGNC Symbol;Acc:25391] [ENST00000536164]                                                         |
| NUP98     | A_23_P308032  | 4.59E-03 | -2.18 | nucleoporin 98kDa                                             | Homo sapiens nucleoporin 98kDa (NUP98), transcript variant 3, mRNA [NM_005387]                                              |
| RAB27B    | A_23_P107612  | 4.62E-03 | 2.96  | RAB27B, member RAS oncogene family                            | Homo sapiens RAB27B, member RAS oncogene family (RAB27B), mRNA [NM_004163]                                                  |
| PIM3      | A_23_P61398   | 4.62E-03 | -2.46 | pim-3 oncogene                                                | Homo sapiens pim-3 oncogene (PIM3), mRNA [NM_001001852]                                                                     |
| KNTC1     | A_23_P136817  | 4.63E-03 | 2.35  | kinetochore associated 1                                      | Homo sapiens kinetochore associated 1 (KNTC1), mRNA [NM_014708]                                                             |
| TSPAN5    | A_33_P3325349 | 4.63E-03 | 3.48  | tetraspanin 5                                                 | Homo sapiens tetraspanin 5 (TSPAN5), mRNA [NM_005723]                                                                       |
| RHOBTB1   | A_33_P3348288 | 4.64E-03 | 2.02  | Rho-related BTB domain containing 1                           | Homo sapiens Rho-related BTB domain containing 1 (RHOBTB1), transcript variant 4, mRNA [NM_001242359]                       |
| EDN2      | A_23_P312150  | 4.71E-03 | -8.18 | endothelin 2                                                  | Homo sapiens endothelin 2 (EDN2), mRNA [NM_001956]                                                                          |
| KRTAP4-12 | A_23_P15798   | 4.71E-03 | -2.55 | keratin associated protein 4-12                               | Homo sapiens keratin associated protein 4-12 (KRTAP4-12), mRNA [NM_031854]                                                  |
| WIPF1     | A_23_P330616  | 4.75E-03 | 2.81  | WAS/WASL interacting protein family, member 1                 | Homo sapiens WAS/WASL interacting protein family, member 1 (WIPF1), transcript variant 2, mRNA [NM_001077269]               |

|          |               |          |       |                                                                        |                                                                                                                                   |
|----------|---------------|----------|-------|------------------------------------------------------------------------|-----------------------------------------------------------------------------------------------------------------------------------|
| ARHGAP25 | A_23_P142974  | 4.75E-03 | 2.81  | Rho GTPase activating protein 25                                       | Homo sapiens Rho GTPase activating protein 25 (ARHGAP25), transcript variant 1, mRNA [NM_001007231]                               |
| PTDSS1   | A_23_P168868  | 4.76E-03 | -2.22 | phosphatidylserine synthase 1                                          | Homo sapiens phosphatidylserine synthase 1 (PTDSS1), mRNA [NM_014754]                                                             |
| CDKN2A   | A_33_P3411628 | 4.77E-03 | 4.66  | cyclin-dependent kinase inhibitor 2A (melanoma, p16, inhibits CDK4)    | Homo sapiens cyclin-dependent kinase inhibitor 2A (melanoma, p16, inhibits CDK4) (CDKN2A), transcript variant 1, mRNA [NM_000077] |
| GRAMD1C  | A_23_P253012  | 4.79E-03 | 4.17  | GRAM domain containing 1C                                              | Homo sapiens GRAM domain containing 1C (GRAMD1C), transcript variant 1, mRNA [NM_017577]                                          |
| FAM133A  | A_23_P345808  | 4.80E-03 | 4.78  | family with sequence similarity 133, member A                          | Homo sapiens family with sequence similarity 133, member A (FAM133A), transcript variant 2, mRNA [NM_173698]                      |
| RIMKLA   | A_23_P349406  | 4.80E-03 | -2.22 | ribosomal modification protein rimK-like family member A               | Homo sapiens ribosomal modification protein rimK-like family member A (RIMKLA), mRNA [NM_173642]                                  |
| C16orf47 | A_33_P3417840 | 4.92E-03 | 2.11  | chromosome 16 open reading frame 47                                    | Homo sapiens cDNA FLJ26184 fis, clone ADG04431. [AK129695]                                                                        |
| PENK     | A_23_P417918  | 4.94E-03 | 10.01 | proenkephalin                                                          | Homo sapiens proenkephalin (PENK), transcript variant 2, mRNA [NM_006211]                                                         |
| TMEM40   | A_33_P3391418 | 4.94E-03 | -2.26 | transmembrane protein 40                                               | Homo sapiens transmembrane protein 40 (TMEM40), mRNA [NM_018306]                                                                  |
| RGS9BP   | A_32_P227605  | 4.99E-03 | -3.03 | regulator of G protein signaling 9 binding protein                     | Homo sapiens regulator of G protein signaling 9 binding protein (RGS9BP), mRNA [NM_207391]                                        |
| CA14     | A_23_P63379   | 5.10E-03 | -7.22 | carbonic anhydrase XIV                                                 | Homo sapiens carbonic anhydrase XIV (CA14), mRNA [NM_012113]                                                                      |
| SLC16A9  | A_23_P115726  | 5.10E-03 | 5.33  | solute carrier family 16, member 9 (monocarboxylic acid transporter 9) | Homo sapiens solute carrier family 16, member 9 (monocarboxylic acid transporter 9) (SLC16A9), mRNA                               |

|          |               |          |       |                                                       |                                                                                                                     |
|----------|---------------|----------|-------|-------------------------------------------------------|---------------------------------------------------------------------------------------------------------------------|
| GNLY     | A_23_P209954  | 5.12E-03 | 6.94  | granulysin                                            | [NM_194298]<br>Homo sapiens granulysin (GNLY), transcript variant NKG5, mRNA                                        |
| TXNIP    | A_23_P97700   | 5.12E-03 | 2.52  | thioredoxin interacting protein                       | [NM_006433]<br>Homo sapiens thioredoxin interacting protein (TXNIP), mRNA [NM_006472]                               |
| ZGLP1    | A_33_P3417452 | 5.18E-03 | 2.49  | zinc finger, GATA-like protein 1                      | Homo sapiens zinc finger, GATA-like protein 1 (ZGLP1), mRNA [NM_001103167]                                          |
| OTUD7A   | A_33_P3262376 | 5.19E-03 | -2.94 | OTU domain containing 7A                              | Homo sapiens OTU domain containing 7A (OTUD7A), mRNA [NM_130901]                                                    |
| RTN4RL2  | A_32_P528311  | 5.20E-03 | -2.36 | reticulon 4 receptor-like 2                           | Homo sapiens reticulon 4 receptor-like 2 (RTN4RL2), mRNA [NM_178570]                                                |
| HLA-DPB1 | A_24_P166443  | 5.24E-03 | 4.94  | major histocompatibility complex, class II, DP beta 1 | Homo sapiens major histocompatibility complex, class II, DP beta 1 (HLA-DPB1), mRNA [NM_002121]                     |
| GMIP     | A_23_P56228   | 5.25E-03 | 4.05  | GEM interacting protein                               | Homo sapiens GEM interacting protein (GMIP), mRNA [NM_016573]                                                       |
| CLDN14   | A_33_P3284036 | 5.25E-03 | 3.98  | claudin 14                                            | claudin 14 [Source:HGNC Symbol;Acc:2035] [ENST00000478313]                                                          |
| ADCK3    | A_23_P85598   | 5.27E-03 | -2.03 | aarF domain containing kinase 3                       | Homo sapiens aarF domain containing kinase 3 (ADCK3), nuclear gene encoding mitochondrial protein, mRNA [NM_020247] |
| HKDC1    | A_23_P202427  | 5.28E-03 | 3.34  | hexokinase domain containing 1                        | Homo sapiens hexokinase domain containing 1 (HKDC1), mRNA [NM_025130]                                               |
| PLA2G4F  | A_24_P147169  | 5.28E-03 | -2.71 | phospholipase A2, group IVF                           | Homo sapiens phospholipase A2, group IVF (PLA2G4F), transcript variant 1, mRNA [NM_213600]                          |
| ZFP36L2  | A_23_P101960  | 5.30E-03 | 2.34  | zinc finger protein 36, C3H type-like 2               | Homo sapiens zinc finger protein 36, C3H type-like 2 (ZFP36L2), mRNA [NM_006887]                                    |

|          |               |          |       |                                                                                          |                                                                                                                                                        |
|----------|---------------|----------|-------|------------------------------------------------------------------------------------------|--------------------------------------------------------------------------------------------------------------------------------------------------------|
| LPXN     | A_23_P87150   | 5.32E-03 | 2.66  | leupaxin                                                                                 | Homo sapiens leupaxin (LPXN), transcript variant 2, mRNA [NM_004811]                                                                                   |
| CPNE7    | A_33_P3262191 | 5.34E-03 | 6.06  | copine VII                                                                               | Homo sapiens copine VII (CPNE7), transcript variant 2, mRNA [NM_014427]                                                                                |
| LILRB1   | A_33_P3231414 | 5.34E-03 | 6.06  | leukocyte immunoglobulin-like receptor, subfamily B (with TM and ITIM domains), member 1 | Homo sapiens leukocyte immunoglobulin-like receptor, subfamily B (with TM and ITIM domains), member 1 (LILRB1), transcript variant 1, mRNA [NM_006669] |
| TRIM11   | A_24_P50908   | 5.36E-03 | 2.29  | tripartite motif containing 11                                                           | tripartite motif containing 11 [Source:HGNC Symbol;Acc:16281] [ENST00000366699]                                                                        |
| GPR174   | A_23_P11070   | 5.37E-03 | 4.59  | G protein-coupled receptor 174                                                           | Homo sapiens G protein-coupled receptor 174 (GPR174), mRNA [NM_032553]                                                                                 |
| ADAM28   | A_33_P3380652 | 5.37E-03 | 4.07  | ADAM metallopeptidase domain 28                                                          | Homo sapiens ADAM metallopeptidase domain 28 (ADAM28), transcript variant 3, mRNA [NM_021777]                                                          |
| MARVELD2 | A_23_P401675  | 5.37E-03 | -2.64 | MARVEL domain containing 2                                                               | MARVEL domain containing 2 [Source:HGNC Symbol;Acc:26401] [ENST00000454295]                                                                            |
| HLA-A    | A_33_P3237567 | 5.37E-03 | 2.18  | major histocompatibility complex, class I, A                                             | major histocompatibility complex, class I, A [Source:HGNC Symbol;Acc:4931] [ENST00000464610]                                                           |
| CHAC2    | A_32_P194264  | 5.37E-03 | -2.01 | ChaC, cation transport regulator homolog 2 (E. coli)                                     | Homo sapiens ChaC, cation transport regulator homolog 2 (E. coli) (CHAC2), mRNA [NM_001008708]                                                         |
| C1orf186 | A_23_P95640   | 5.38E-03 | 5.86  | chromosome 1 open reading frame 186                                                      | Homo sapiens chromosome 1 open reading frame 186 (C1orf186), mRNA [NM_001007544]                                                                       |
| AIM1L    | A_33_P3327642 | 5.39E-03 | 3.71  | absent in melanoma 1-like                                                                | Homo sapiens absent in melanoma 1-like (AIM1L), mRNA [NM_001039775]                                                                                    |
| HLA-DOA  | A_32_P356316  | 5.44E-03 | 5.60  | major histocompatibility                                                                 | Homo sapiens major histocompatibility                                                                                                                  |

|          |               |          |       |                                                                                        |                                                                                                                                           |
|----------|---------------|----------|-------|----------------------------------------------------------------------------------------|-------------------------------------------------------------------------------------------------------------------------------------------|
| FLJ31104 | A_33_P3695899 | 5.47E-03 | 3.27  | complex, class II, DO alpha<br>uncharacterized LOC441072                               | complex, class II, DO alpha (HLA-DOA), mRNA [NM_002119]<br>PREDICTED: Homo sapiens hypothetical LOC441072 (FLJ31104), miscRNA [XR_108600] |
| MYO1G    | A_24_P206343  | 5.49E-03 | 7.73  | myosin IG                                                                              | Homo sapiens myosin IG (MYO1G), mRNA [NM_033054]                                                                                          |
| MCTP2    | A_23_P65789   | 5.50E-03 | 2.21  | multiple C2 domains,<br>transmembrane 2                                                | Homo sapiens multiple C2 domains, transmembrane 2 (MCTP2), transcript variant 1, mRNA [NM_018349]                                         |
| AIG1     | A_33_P3416568 | 5.50E-03 | -2.11 | androgen-induced 1                                                                     | androgen-induced 1 [Source:HGNC Symbol;Acc:21607] [ENST00000367596]                                                                       |
| FAM49A   | A_23_P21560   | 5.50E-03 | 2.11  | family with sequence similarity 49, member A                                           | Homo sapiens family with sequence similarity 49, member A (FAM49A), mRNA [NM_030797]                                                      |
| KLHDC7B  | A_23_P6535    | 5.52E-03 | 8.19  | kelch domain containing 7B                                                             | Homo sapiens kelch domain containing 7B (KLHDC7B), mRNA [NM_138433]                                                                       |
| ZSWIM5   | A_23_P383118  | 5.52E-03 | 2.67  | zinc finger, SWIM-type<br>containing 5                                                 | Homo sapiens zinc finger, SWIM-type containing 5 (ZSWIM5), mRNA [NM_020883]                                                               |
| KIR2DS2  | A_23_P130815  | 5.53E-03 | 7.11  | killer cell immunoglobulin-like<br>receptor, two domains, short<br>cytoplasmic tail, 2 | Homo sapiens killer cell immunoglobulin-like receptor, two domains, short cytoplasmic tail, 2 (KIR2DS2), mRNA [NM_012312]                 |
| TNFSF13B | A_23_P14174   | 5.53E-03 | 5.40  | tumor necrosis factor (ligand)<br>superfamily, member 13b                              | Homo sapiens tumor necrosis factor (ligand) superfamily, member 13b (TNFSF13B), transcript variant 1, mRNA [NM_006573]                    |
| ANKRD36B | A_33_P3261648 | 5.53E-03 | 3.54  | ankyrin repeat domain 36B                                                              | Homo sapiens ankyrin repeat domain 36B (ANKRD36B), mRNA [NM_025190]                                                                       |
| SRGAP2P2 | A_33_P3372705 | 5.54E-03 | 2.26  | SLIT-ROBO Rho GTPase<br>activating protein 2 pseudogene<br>2                           | Homo sapiens SLIT-ROBO Rho GTPase activating protein 2 pseudogene 2 (SRGAP2P2), non-coding RNA                                            |

|           |               |          |       |                                                                                 |                                                                                                                           |
|-----------|---------------|----------|-------|---------------------------------------------------------------------------------|---------------------------------------------------------------------------------------------------------------------------|
| ASPN      | A_33_P3216059 | 5.56E-03 | 5.01  | asporin                                                                         | [NR_034178]<br>Homo sapiens asporin (ASPN), transcript variant 2, mRNA [NM_001193335]                                     |
| CLEC10A   | A_23_P141505  | 5.57E-03 | 5.23  | C-type lectin domain family 10, member A                                        | Homo sapiens C-type lectin domain family 10, member A (CLEC10A), transcript variant 1, mRNA [NM_182906]                   |
| CPXM2     | A_33_P3333158 | 5.57E-03 | 5.10  | carboxypeptidase X (M14 family), member 2                                       | Homo sapiens carboxypeptidase X (M14 family), member 2 (CPXM2), mRNA [NM_198148]                                          |
| CD300LF   | A_23_P55020   | 5.57E-03 | 4.95  | CD300 molecule-like family member f                                             | Homo sapiens CD300 molecule-like family member f (CD300LF), mRNA [NM_139018]                                              |
| LOC728392 | A_33_P3331491 | 5.62E-03 | 2.26  | uncharacterized LOC728392                                                       | Homo sapiens uncharacterized protein LOC728392 (LOC728392), mRNA [NM_001162371]                                           |
| MYO19     | A_23_P100868  | 5.63E-03 | -2.48 | myosin XIX                                                                      | Homo sapiens myosin XIX (MYO19), transcript variant 3, mRNA [NM_001033580]                                                |
| PCNXL2    | A_23_P200260  | 5.69E-03 | 4.77  | pecanex-like 2 (Drosophila)                                                     | Homo sapiens pecanex-like 2 (Drosophila) (PCNXL2), transcript variant 1, mRNA [NM_014801]                                 |
| SEMA6B    | A_33_P3263651 | 5.74E-03 | -2.23 | sema domain, transmembrane domain (TM), and cytoplasmic domain, (semaphorin) 6B | Homo sapiens sema domain, transmembrane domain (TM), and cytoplasmic domain, (semaphorin) 6B (SEMA6B), mRNA [NM_032108]   |
| RASGRP2   | A_33_P3209962 | 5.79E-03 | -2.38 | RAS guanyl releasing protein 2 (calcium and DAG-regulated)                      | Homo sapiens RAS guanyl releasing protein 2 (calcium and DAG-regulated) (RASGRP2), transcript variant 2, mRNA [NM_153819] |
| SLC20A2   | A_33_P3386835 | 5.83E-03 | -2.02 | solute carrier family 20 (phosphate transporter), member 2                      | solute carrier family 20 (phosphate transporter), member 2 [Source:HGNC Symbol;Acc:10947] [ENST00000523340]               |
| BTN3A2    | A_33_P3227880 | 5.87E-03 | 4.60  | butyrophilin, subfamily 3,                                                      | Homo sapiens butyrophilin, subfamily 3,                                                                                   |

|          |               |          |       |                                                            |                                                                                                                      |
|----------|---------------|----------|-------|------------------------------------------------------------|----------------------------------------------------------------------------------------------------------------------|
|          |               |          |       | member A2                                                  | member A2 (BTN3A2), transcript variant 3, mRNA [NM_001197247]                                                        |
| HDAC10   | A_23_P368740  | 5.88E-03 | 2.93  | histone deacetylase 10                                     | Homo sapiens histone deacetylase 10 (HDAC10), transcript variant 1, mRNA [NM_032019]                                 |
| PTPRVP   | A_33_P3309481 | 5.95E-03 | 4.47  | protein tyrosine phosphatase, receptor type, V, pseudogene | Homo sapiens protein tyrosine phosphatase, receptor type, V, pseudogene (PTPRVP), non-coding RNA [NR_002930]         |
| RNASET2  | A_24_P360269  | 5.96E-03 | 2.72  | ribonuclease T2                                            | Homo sapiens ribonuclease T2 (RNASET2), mRNA [NM_003730]                                                             |
| TNFSF14  | A_24_P237036  | 6.00E-03 | 8.94  | tumor necrosis factor (ligand) superfamily, member 14      | Homo sapiens tumor necrosis factor (ligand) superfamily, member 14 (TNFSF14), transcript variant 1, mRNA [NM_003807] |
| HELB     | A_23_P2294    | 6.00E-03 | 3.76  | helicase (DNA) B                                           | Homo sapiens helicase (DNA) B (HELB), mRNA [NM_033647]                                                               |
| SFI1     | A_23_P80278   | 6.04E-03 | 2.36  | Sfi1 homolog, spindle assembly associated (yeast)          | Homo sapiens Sfi1 homolog, spindle assembly associated (yeast) (SFI1), transcript variant 1, mRNA [NM_001007467]     |
| LEF1     | A_24_P20630   | 6.05E-03 | 9.16  | lymphoid enhancer-binding factor 1                         | Homo sapiens lymphoid enhancer-binding factor 1 (LEF1), transcript variant 1, mRNA [NM_016269]                       |
| MREG     | A_23_P108948  | 6.05E-03 | 5.06  | melanoregulin                                              | Homo sapiens melanoregulin (MREG), mRNA [NM_018000]                                                                  |
| VAV3     | A_23_P201551  | 6.05E-03 | 2.64  | vav 3 guanine nucleotide exchange factor                   | Homo sapiens vav 3 guanine nucleotide exchange factor (VAV3), transcript variant 1, mRNA [NM_006113]                 |
| GTF2IRD1 | A_23_P111621  | 6.05E-03 | -2.16 | GTF2I repeat domain containing 1                           | Homo sapiens GTF2I repeat domain containing 1 (GTF2IRD1), transcript variant 2, mRNA [NM_005685]                     |
| sept-11  | A_33_P3310475 | 6.05E-03 | 2.12  | septin 11                                                  | Homo sapiens septin 11 (SEPT11), mRNA                                                                                |

|              |                |          |        |                                        |                                                                                                             |
|--------------|----------------|----------|--------|----------------------------------------|-------------------------------------------------------------------------------------------------------------|
| AURKA        | A_23_P131866   | 6.07E-03 | -2.19  | aurora kinase A                        | [NM_018243]<br>Homo sapiens aurora kinase A (AURKA), transcript variant 1, mRNA [NM_198433]                 |
| COL16A1      | A_23_P160318   | 6.09E-03 | 3.28   | collagen, type XVI, alpha 1            | Homo sapiens collagen, type XVI, alpha 1 (COL16A1), mRNA [NM_001856]                                        |
| GPR34        | A_23_P11201    | 6.12E-03 | 5.36   | G protein-coupled receptor 34          | Homo sapiens G protein-coupled receptor 34 (GPR34), transcript variant 4, mRNA [NM_001097579]               |
| LMF2         | A_33_P3408632  | 6.14E-03 | -2.23  | lipase maturation factor 2             | Homo sapiens lipase maturation factor 2 (LMF2), mRNA [NM_033200]                                            |
| LOC100506380 | A_19_P00809902 | 6.22E-03 | -3.24  |                                        | PREDICTED: Homo sapiens hypothetical LOC100506380, transcript variant 2 (LOC100506380), miscRNA [XR_108713] |
| ZMYND15      | A_23_P89570    | 6.24E-03 | 2.55   | zinc finger, MYND-type containing 15   | Homo sapiens zinc finger, MYND-type containing 15 (ZMYND15), transcript variant 2, mRNA [NM_032265]         |
| C21orf96     | A_24_P65941    | 6.28E-03 | 8.55   | chromosome 21 open reading frame 96    | Homo sapiens chromosome 21 open reading frame 96 (C21orf96), non-coding RNA [NR_026812]                     |
| FOXN2        | A_32_P140898   | 6.32E-03 | 2.44   | forkhead box N2                        | Homo sapiens forkhead box N2 (FOXN2), mRNA [NM_002158]                                                      |
| PCDH20       | A_23_P204885   | 6.34E-03 | -12.28 | protocadherin 20                       | Homo sapiens protocadherin 20 (PCDH20), mRNA [NM_022843]                                                    |
| HEMK1        | A_24_P268729   | 6.34E-03 | 2.80   | HemK methyltransferase family member 1 | Homo sapiens HemK methyltransferase family member 1 (HEMK1), mRNA [NM_016173]                               |
| LOC100128851 | A_33_P3411885  | 6.35E-03 | -2.37  | uncharacterized LOC100128851           | Homo sapiens cDNA FLJ45515 fis, clone BRTHA2022914. [AK127423]                                              |
| BMF          | A_23_P379649   | 6.39E-03 | 3.14   | Bcl2 modifying factor                  | Homo sapiens Bcl2 modifying factor (BMF), transcript variant 1, mRNA [NM_001003940]                         |
| LPHN1        | A_23_P391926   | 6.42E-03 | -2.01  | latrophilin 1                          | Homo sapiens latrophilin 1 (LPHN1), transcript variant 1, mRNA                                              |

|              |               |          |       |                                                   |                                                                                                        |
|--------------|---------------|----------|-------|---------------------------------------------------|--------------------------------------------------------------------------------------------------------|
| FIBIN        | A_33_P3325497 | 6.42E-03 | 4.81  | fin bud initiation factor homolog (zebrafish)     | [NM_001008701]<br>Homo sapiens fin bud initiation factor homolog (zebrafish) (FIBIN), mRNA [NM_203371] |
| C9orf93      | A_32_P395879  | 6.42E-03 | 3.58  | chromosome 9 open reading frame 93                | Homo sapiens chromosome 9 open reading frame 93 (C9orf93), mRNA [NM_173550]                            |
| EDEM1        | A_24_P285768  | 6.42E-03 | 2.15  | ER degradation enhancer, mannosidase alpha-like 1 | Homo sapiens ER degradation enhancer, mannosidase alpha-like 1 (EDEM1), mRNA [NM_014674]               |
| LOC100129516 | A_32_P214284  | 6.43E-03 | -2.42 | uncharacterized LOC100129516                      | PREDICTED: Homo sapiens hypothetical protein LOC100129516 (LOC100129516), mRNA [XM_003119920]          |
| PABPC1L      | A_24_P92183   | 6.44E-03 | 3.93  | poly(A) binding protein, cytoplasmic 1-like       | Homo sapiens poly(A) binding protein, cytoplasmic 1-like (PABPC1L), mRNA [NM_001124756]                |
| RHOD         | A_23_P1523    | 6.45E-03 | -2.92 | ras homolog gene family, member D                 | Homo sapiens ras homolog gene family, member D (RHOD), mRNA [NM_014578]                                |
| ARHGAP15     | A_23_P84154   | 6.50E-03 | 2.65  | Rho GTPase activating protein 15                  | Homo sapiens Rho GTPase activating protein 15 (ARHGAP15), mRNA [NM_018460]                             |
| SELL         | A_33_P3400273 | 6.50E-03 | 8.13  | selectin L                                        | Homo sapiens selectin L (SELL), transcript variant 1, mRNA [NM_000655]                                 |
| FER1L5       | A_33_P3299055 | 6.56E-03 | -2.01 | fer-1-like 5 (C. elegans)                         | Homo sapiens fer-1-like 5 (C. elegans) (FER1L5), mRNA [NM_001113382]                                   |
| ARRDC2       | A_24_P22976   | 6.59E-03 | 2.80  | arrestin domain containing 2                      | Homo sapiens arrestin domain containing 2 (ARRDC2), transcript variant 2, mRNA [NM_001025604]          |
| DDIT4        | A_23_P104318  | 6.61E-03 | 4.02  | DNA-damage-inducible transcript 4                 | Homo sapiens DNA-damage-inducible transcript 4 (DDIT4), mRNA [NM_019058]                               |
| HIST1H2AM    | A_32_P221799  | 6.61E-03 | 3.41  | histone cluster 1, H2am                           | Homo sapiens histone cluster 1, H2am (HIST1H2AM), mRNA [NM_003514]                                     |

|         |               |          |       |                                                                 |                                                                                                                      |
|---------|---------------|----------|-------|-----------------------------------------------------------------|----------------------------------------------------------------------------------------------------------------------|
| ICOS    | A_23_P371215  | 6.66E-03 | 5.01  | inducible T-cell co-stimulator                                  | Homo sapiens inducible T-cell co-stimulator (ICOS), mRNA [NM_012092]                                                 |
| VANGL2  | A_33_P3282005 | 6.68E-03 | -2.56 | vang-like 2 (van gogh, Drosophila)                              | Homo sapiens vang-like 2 (van gogh, Drosophila) (VANGL2), mRNA [NM_020335]                                           |
| ABCC3   | A_23_P207507  | 6.76E-03 | 5.58  | ATP-binding cassette, sub-family C (CFTR/MRP), member 3         | Homo sapiens ATP-binding cassette, sub-family C (CFTR/MRP), member 3 (ABCC3), transcript variant 1, mRNA [NM_003786] |
| TNFRSF9 | A_23_P51936   | 6.78E-03 | 2.34  | tumor necrosis factor receptor superfamily, member 9            | Homo sapiens tumor necrosis factor receptor superfamily, member 9 (TNFRSF9), mRNA [NM_001561]                        |
| APBA2   | A_33_P3344504 | 6.82E-03 | 11.73 | amyloid beta (A4) precursor protein-binding, family A, member 2 | amyloid beta (A4) precursor protein-binding, family A, member 2 [Source:HGNC Symbol;Acc:579] [ENST00000382938]       |
| KCNIP4  | A_33_P3274194 | 6.84E-03 | 2.11  | Kv channel interacting protein 4                                | Homo sapiens Kv channel interacting protein 4 (KCNIP4), transcript variant 5, mRNA [NM_001035003]                    |
| IFNG    | A_23_P151294  | 6.86E-03 | 5.86  | interferon, gamma                                               | Homo sapiens interferon, gamma (IFNG), mRNA [NM_000619]                                                              |
| TLR8    | A_23_P73837   | 6.97E-03 | 7.09  | toll-like receptor 8                                            | Homo sapiens toll-like receptor 8 (TLR8), mRNA [NM_138636]                                                           |
| LDLRAD2 | A_33_P3260125 | 6.97E-03 | 6.63  | low density lipoprotein receptor class A domain containing 2    | Homo sapiens low density lipoprotein receptor class A domain containing 2 (LDLRAD2), mRNA [NM_001013693]             |
| FAM159A | A_33_P3295786 | 6.97E-03 | 2.68  | family with sequence similarity 159, member A                   | Homo sapiens family with sequence similarity 159, member A (FAM159A), mRNA [NM_001042693]                            |
| PDE4A   | A_24_P322474  | 7.02E-03 | -2.14 | phosphodiesterase 4A, cAMP-specific                             | Homo sapiens phosphodiesterase 4A, cAMP-specific (PDE4A), transcript variant 4, mRNA [NM_006202]                     |
| AIDA    | A_33_P3250857 | 7.02E-03 | -2.08 | axin interactor, dorsalization                                  | axin interactor, dorsalization associated                                                                            |

|          |               |          |       |                                                 |                                                                                                               |
|----------|---------------|----------|-------|-------------------------------------------------|---------------------------------------------------------------------------------------------------------------|
|          |               |          |       | associated                                      | [Source:HGNC Symbol;Acc:25761]<br>[ENST00000474863]                                                           |
| PDE6A    | A_23_P81590   | 7.08E-03 | 4.42  | phosphodiesterase 6A, cGMP-specific, rod, alpha | Homo sapiens phosphodiesterase 6A, cGMP-specific, rod, alpha (PDE6A), mRNA [NM_000440]                        |
| NPFRR2   | A_23_P155900  | 7.08E-03 | 6.33  | neuropeptide FF receptor 2                      | Homo sapiens neuropeptide FF receptor 2 (NPFRR2), transcript variant 2, mRNA [NM_053036]                      |
| TP53INP1 | A_23_P168882  | 7.08E-03 | 2.51  | tumor protein p53 inducible nuclear protein 1   | Homo sapiens tumor protein p53 inducible nuclear protein 1 (TP53INP1), transcript variant 1, mRNA [NM_033285] |
| S100A7A  | A_33_P3393504 | 7.14E-03 | -2.65 | S100 calcium binding protein A7A                | S100 calcium binding protein A7A [Source:HGNC Symbol;Acc:21657]<br>[ENST00000329256]                          |
| CD72     | A_23_P250245  | 7.17E-03 | 7.27  | CD72 molecule                                   | Homo sapiens CD72 molecule (CD72), mRNA [NM_001782]                                                           |
| H1FX-AS1 | A_33_P3368771 | 7.18E-03 | 3.17  | H1FX antisense RNA 1 (non-protein coding)       | Homo sapiens H1FX antisense RNA 1 (non-protein coding) (H1FX-AS1), non-coding RNA [NR_026991]                 |
| ATP2A3   | A_23_P207632  | 7.18E-03 | 3.07  | ATPase, Ca++ transporting, ubiquitous           | Homo sapiens ATPase, Ca++ transporting, ubiquitous (ATP2A3), transcript variant 5, mRNA [NM_174953]           |
| APOL6    | A_23_P155052  | 7.19E-03 | 2.73  | apolipoprotein L, 6                             | Homo sapiens apolipoprotein L, 6 (APOL6), mRNA [NM_030641]                                                    |
| CA5B     | A_33_P3316068 | 7.23E-03 | 2.35  | carbonic anhydrase VB, mitochondrial            | carbonic anhydrase VB, mitochondrial [Source:HGNC Symbol;Acc:1378]<br>[ENST00000380313]                       |
| MPEG1    | A_24_P153568  | 7.23E-03 | 5.88  | macrophage expressed 1                          | Homo sapiens macrophage expressed 1 (MPEG1), mRNA [NM_001039396]                                              |
| JPH1     | A_33_P3364348 | 7.23E-03 | -3.02 | junctionophilin 1                               | Homo sapiens junctionophilin 1 (JPH1), mRNA [NM_020647]                                                       |
| PYCARD   | A_23_P26629   | 7.23E-03 | 2.93  | PYD and CARD domain containing                  | Homo sapiens PYD and CARD domain containing (PYCARD), transcript variant                                      |

|              |                |          |       |                                                         |                                                                                                                   |
|--------------|----------------|----------|-------|---------------------------------------------------------|-------------------------------------------------------------------------------------------------------------------|
| SLFN13       | A_33_P3275487  | 7.23E-03 | 4.95  | schlafen family member 13                               | 1, mRNA [NM_013258]<br>Homo sapiens schlafen family member 13 (SLFN13), mRNA [NM_144682]                          |
| SHC4         | A_32_P234145   | 7.31E-03 | 3.69  | SHC (Src homology 2 domain containing) family, member 4 | Homo sapiens SHC (Src homology 2 domain containing) family, member 4 (SHC4), mRNA [NM_203349]                     |
| SPHK1        | A_33_P3222069  | 7.31E-03 | -2.06 | sphingosine kinase 1                                    | Homo sapiens sphingosine kinase 1 (SPHK1), transcript variant 2, mRNA [NM_182965]                                 |
| LOC100129596 | A_33_P3364964  | 7.31E-03 | -3.34 | uncharacterized LOC100129596                            | PREDICTED: Homo sapiens hypothetical LOC100129596 (LOC100129596), miscRNA [XR_110585]                             |
| ANPEP        | A_23_P88626    | 7.34E-03 | 4.51  | alanyl (membrane) aminopeptidase                        | Homo sapiens alanyl (membrane) aminopeptidase (ANPEP), mRNA [NM_001150]                                           |
| MEG3         | A_19_P00316675 | 7.35E-03 | 3.03  |                                                         | Homo sapiens maternally expressed 3 (non-protein coding) (MEG3), transcript variant 5, non-coding RNA [NR_033359] |
| VAV1         | A_23_P38959    | 7.36E-03 | 4.98  | vav 1 guanine nucleotide exchange factor                | Homo sapiens vav 1 guanine nucleotide exchange factor (VAV1), mRNA [NM_005428]                                    |
| GPR132       | A_23_P128808   | 7.40E-03 | 3.34  | G protein-coupled receptor 132                          | Homo sapiens G protein-coupled receptor 132 (GPR132), mRNA [NM_013345]                                            |
| SIGLECP3     | A_32_P128258   | 7.43E-03 | 9.06  | sialic acid binding Ig-like lectin, pseudogene 3        | Homo sapiens sialic acid binding Ig-like lectin, pseudogene 3 (SIGLECP3), non-coding RNA [NR_002804]              |
| FMO3         | A_23_P155596   | 7.51E-03 | 4.15  | flavin containing monooxygenase 3                       | Homo sapiens flavin containing monooxygenase 3 (FMO3), transcript variant 2, mRNA [NM_001002294]                  |
| SPATA24      | A_24_P220897   | 7.51E-03 | -2.72 | spermatogenesis associated 24                           | Homo sapiens spermatogenesis associated 24 (SPATA24), mRNA [NM_194296]                                            |

|          |               |          |       |                                                                    |                                                                                                                                  |
|----------|---------------|----------|-------|--------------------------------------------------------------------|----------------------------------------------------------------------------------------------------------------------------------|
| PTPN18   | A_23_P210015  | 7.57E-03 | 2.41  | protein tyrosine phosphatase, non-receptor type 18 (brain-derived) | Homo sapiens protein tyrosine phosphatase, non-receptor type 18 (brain-derived) (PTPN18), transcript variant 1, mRNA [NM_014369] |
| ZNF217   | A_23_P210608  | 7.59E-03 | 2.06  | zinc finger protein 217                                            | Homo sapiens zinc finger protein 217 (ZNF217), mRNA [NM_006526]                                                                  |
| OR5F1    | A_23_P127684  | 7.60E-03 | -5.02 | olfactory receptor, family 5, subfamily F, member 1                | Homo sapiens olfactory receptor, family 5, subfamily F, member 1 (OR5F1), mRNA [NM_003697]                                       |
| PVR      | A_23_P141894  | 7.67E-03 | -2.61 | poliovirus receptor                                                | Homo sapiens poliovirus receptor (PVR), transcript variant 1, mRNA [NM_006505]                                                   |
| PRLHR    | A_33_P3370364 | 7.67E-03 | -2.00 | prolactin releasing hormone receptor                               | Homo sapiens prolactin releasing hormone receptor (PRLHR), mRNA [NM_004248]                                                      |
| CP       | A_33_P3296587 | 7.74E-03 | 3.54  | ceruloplasmin (ferroxidase)                                        | Homo sapiens ceruloplasmin (ferroxidase) (CP), mRNA [NM_000096]                                                                  |
| PTPN6    | A_23_P162486  | 7.74E-03 | 3.53  | protein tyrosine phosphatase, non-receptor type 6                  | Homo sapiens protein tyrosine phosphatase, non-receptor type 6 (PTPN6), transcript variant 1, mRNA [NM_002831]                   |
| ANGPTL1  | A_23_P126706  | 7.77E-03 | 3.96  | angiotensin-like 1                                                 | Homo sapiens angiotensin-like 1 (ANGPTL1), mRNA [NM_004673]                                                                      |
| KIAA1407 | A_23_P419213  | 7.83E-03 | 4.45  | KIAA1407                                                           | Homo sapiens KIAA1407 (KIAA1407), mRNA [NM_020817]                                                                               |
| LRRC38   | A_23_P103877  | 7.85E-03 | -9.11 | leucine rich repeat containing 38                                  | Homo sapiens leucine rich repeat containing 38 (LRRC38), mRNA [NM_001010847]                                                     |
| C4orf11  | A_33_P3304060 | 7.85E-03 | -4.60 | chromosome 4 open reading frame 11                                 | Homo sapiens chromosome 4 open reading frame 11 (C4orf11), transcript variant 1, non-coding RNA [NR_024087]                      |
| RAP1GAP2 | A_33_P3333146 | 7.85E-03 | -3.45 | RAP1 GTPase activating protein 2                                   | Homo sapiens RAP1 GTPase activating protein 2 (RAP1GAP2), transcript variant 1, mRNA [NM_015085]                                 |

|           |               |          |       |                                                                              |                                                                                                                                         |
|-----------|---------------|----------|-------|------------------------------------------------------------------------------|-----------------------------------------------------------------------------------------------------------------------------------------|
| VAC14     | A_33_P3363091 | 7.85E-03 | 2.68  | Vac14 homolog ( <i>S. cerevisiae</i> )                                       | Human Tax1 binding protein mRNA, partial cds. [U25801]                                                                                  |
| SPC24     | A_24_P314571  | 7.86E-03 | -2.28 | SPC24, NDC80 kinetochore complex component, homolog ( <i>S. cerevisiae</i> ) | Homo sapiens cDNA FLJ90806 fis, clone Y79AA1000750. [AK075287]                                                                          |
| ATP1A4    | A_23_P160177  | 7.91E-03 | -2.46 | ATPase, Na <sup>+</sup> /K <sup>+</sup> transporting, alpha 4 polypeptide    | Homo sapiens ATPase, Na <sup>+</sup> /K <sup>+</sup> transporting, alpha 4 polypeptide (ATP1A4), transcript variant 1, mRNA [NM_144699] |
| DUSP18    | A_23_P143650  | 7.94E-03 | 2.07  | dual specificity phosphatase 18                                              | Homo sapiens dual specificity phosphatase 18 (DUSP18), mRNA [NM_152511]                                                                 |
| ZBED2     | A_23_P113793  | 7.99E-03 | 3.20  | zinc finger, BED-type containing 2                                           | Homo sapiens zinc finger, BED-type containing 2 (ZBED2), mRNA [NM_024508]                                                               |
| CYTL1     | A_23_P10647   | 7.99E-03 | 2.40  | cytokine-like 1                                                              | Homo sapiens cytokine-like 1 (CYTL1), mRNA [NM_018659]                                                                                  |
| LOC283050 | A_33_P3394140 | 8.01E-03 | 2.43  | uncharacterized LOC283050                                                    | Homo sapiens uncharacterized LOC283050 (LOC283050), transcript variant 1, non-coding RNA [NR_024431]                                    |
| HLA-DPB2  | A_24_P288836  | 8.02E-03 | 5.22  | major histocompatibility complex, class II, DP beta 2 (pseudogene)           | Homo sapiens major histocompatibility complex, class II, DP beta 2 (pseudogene) (HLA-DPB2), non-coding RNA [NR_001435]                  |
| FNDC5     | A_23_P420326  | 8.08E-03 | -2.56 | fibronectin type III domain containing 5                                     | Homo sapiens fibronectin type III domain containing 5 (FNDC5), transcript variant 2, mRNA [NM_153756]                                   |
| MEX3D     | A_23_P39453   | 8.08E-03 | -2.45 | mex-3 homolog D ( <i>C. elegans</i> )                                        | Homo sapiens mex-3 homolog D ( <i>C. elegans</i> ) (MEX3D), transcript variant 1, mRNA [NM_203304]                                      |
| BEND6     | A_33_P3329769 | 8.10E-03 | 4.83  | BEN domain containing 6                                                      | Homo sapiens BEN domain containing 6 (BEND6), mRNA [NM_152731]                                                                          |
| C15orf59  | A_33_P3398917 | 8.10E-03 | -2.32 | chromosome 15 open reading                                                   | Homo sapiens chromosome 15 open                                                                                                         |

|            |               |          |       |                                                                                  |                                                                                                                                                            |
|------------|---------------|----------|-------|----------------------------------------------------------------------------------|------------------------------------------------------------------------------------------------------------------------------------------------------------|
| GCET2      | A_24_P182947  | 8.10E-03 | 4.00  | frame 59<br>germinal center expressed transcript 2                               | reading frame 59 (C15orf59), mRNA [NM_001039614]<br>Homo sapiens germinal center expressed transcript 2 (GCET2), transcript variant 3, mRNA [NM_001190259] |
| ANKRD36BP2 | A_24_P341089  | 8.10E-03 | 3.64  | ankyrin repeat domain 36B pseudogene 2                                           | Homo sapiens ankyrin repeat domain 36B pseudogene 2 (ANKRD36BP2), non-coding RNA [NR_015424]                                                               |
| SPRY3      | A_23_P311010  | 8.10E-03 | -2.23 | sprouty homolog 3 (Drosophila)                                                   | Homo sapiens sprouty homolog 3 (Drosophila) (SPRY3), mRNA [NM_005840]                                                                                      |
| MFAP4      | A_23_P164057  | 8.12E-03 | 3.06  | microfibrillar-associated protein 4                                              | Homo sapiens microfibrillar-associated protein 4 (MFAP4), transcript variant 2, mRNA [NM_002404]                                                           |
| ARHGAP4    | A_33_P3237927 | 8.12E-03 | 2.70  | Rho GTPase activating protein 4                                                  | Homo sapiens Rho GTPase activating protein 4 (ARHGAP4), transcript variant 1, mRNA [NM_001164741]                                                          |
| INO80D     | A_23_P209652  | 8.14E-03 | -2.09 | INO80 complex subunit D                                                          | Homo sapiens INO80 complex subunit D (INO80D), mRNA [NM_017759]                                                                                            |
| STARD5     | A_23_P158880  | 8.16E-03 | 2.62  | StAR-related lipid transfer (START) domain containing 5                          | Homo sapiens StAR-related lipid transfer (START) domain containing 5 (STARD5), mRNA [NM_181900]                                                            |
| PPM1N      | A_33_P3279681 | 8.20E-03 | 2.24  | protein phosphatase, Mg <sup>2+</sup> /Mn <sup>2+</sup> dependent, 1N (putative) | Homo sapiens protein phosphatase, Mg <sup>2+</sup> /Mn <sup>2+</sup> dependent, 1N (putative) (PPM1N), mRNA [NM_001080401]                                 |
| PIF1       | A_23_P416468  | 8.20E-03 | 2.97  | PIF1 5'-to-3' DNA helicase homolog ( <i>S. cerevisiae</i> )                      | Homo sapiens PIF1 5'-to-3' DNA helicase homolog ( <i>S. cerevisiae</i> ) (PIF1), mRNA [NM_025049]                                                          |
| AGAP3      | A_33_P3240543 | 8.20E-03 | -2.27 | ArfGAP with GTPase domain, ankyrin repeat and PH domain 3                        | Homo sapiens ArfGAP with GTPase domain, ankyrin repeat and PH domain 3 (AGAP3), transcript variant 2, mRNA [NM_001042535]                                  |

|              |               |          |       |                                                                    |                                                                                                                            |
|--------------|---------------|----------|-------|--------------------------------------------------------------------|----------------------------------------------------------------------------------------------------------------------------|
| B3GAT1       | A_23_P1833    | 8.30E-03 | 6.52  | beta-1,3-glucuronyltransferase 1 (glucuronosyltransferase P)       | Homo sapiens beta-1,3-glucuronyltransferase 1 (glucuronosyltransferase P) (B3GAT1), transcript variant 2, mRNA [NM_054025] |
| WNT3         | A_23_P130158  | 8.35E-03 | -2.38 | wingless-type MMTV integration site family, member 3               | Homo sapiens wingless-type MMTV integration site family, member 3 (WNT3), mRNA [NM_030753]                                 |
| RNASE6       | A_23_P3014    | 8.39E-03 | 5.26  | ribonuclease, RNase A family, k6                                   | Homo sapiens ribonuclease, RNase A family, k6 (RNASE6), mRNA [NM_005615]                                                   |
| RASSF10      | A_33_P3399634 | 8.41E-03 | -3.73 | Ras association (RalGDS/AF-6) domain family (N-terminal) member 10 | Homo sapiens Ras association (RalGDS/AF-6) domain family (N-terminal) member 10 (RASSF10), mRNA [NM_001080521]             |
| LOC284276    | A_33_P3387766 | 8.43E-03 | 2.41  | uncharacterized LOC284276                                          | Homo sapiens uncharacterized LOC284276 (LOC284276), non-coding RNA [NR_015417]                                             |
| KRTCAP3      | A_23_P433132  | 8.44E-03 | 3.78  | keratinocyte associated protein 3                                  | Homo sapiens keratinocyte associated protein 3 (KRTCAP3), transcript variant 2, mRNA [NM_173853]                           |
| ENDOG        | A_23_P83266   | 8.44E-03 | -2.07 | endonuclease G                                                     | Homo sapiens endonuclease G (ENDOG), nuclear gene encoding mitochondrial protein, mRNA [NM_004435]                         |
| SCGB1D2      | A_23_P150555  | 8.50E-03 | -8.50 | secretoglobin, family 1D, member 2                                 | Homo sapiens secretoglobin, family 1D, member 2 (SCGB1D2), mRNA [NM_006551]                                                |
| NCKAP1L      | A_23_P128201  | 8.53E-03 | 8.12  | NCK-associated protein 1-like                                      | Homo sapiens NCK-associated protein 1-like (NCKAP1L), transcript variant 1, mRNA [NM_005337]                               |
| LOC100129322 | A_33_P3385121 | 8.54E-03 | 8.06  | uncharacterized LOC100129322                                       | Homo sapiens cDNA FLJ45776 fis, clone NETRP2004090. [AK127678]                                                             |
| IFIT2        | A_23_P24004   | 8.54E-03 | 3.20  | interferon-induced protein with tetratricopeptide repeats 2        | Homo sapiens interferon-induced protein with tetratricopeptide repeats 2                                                   |

|           |                |          |       |                                                                                                |                                                                                                                                             |
|-----------|----------------|----------|-------|------------------------------------------------------------------------------------------------|---------------------------------------------------------------------------------------------------------------------------------------------|
| PCBP1-AS1 | A_19_P00317631 | 8.54E-03 | 2.42  |                                                                                                | (IFIT2), mRNA [NM_001547]<br>Homo sapiens PCBP1 antisense RNA 1 (non-protein coding) (PCBP1-AS1), non-coding RNA [NR_033872]                |
| MIS18BP1  | A_23_P364107   | 8.54E-03 | 2.21  | MIS18 binding protein 1                                                                        | Homo sapiens MIS18 binding protein 1 (MIS18BP1), mRNA [NM_018353]                                                                           |
| OMD       | A_23_P94397    | 8.55E-03 | 4.83  | osteomodulin                                                                                   | Homo sapiens osteomodulin (OMD), mRNA [NM_005014]                                                                                           |
| GRIK2     | A_33_P3307144  | 8.58E-03 | -4.91 | glutamate receptor, ionotropic, kainate 2                                                      | Homo sapiens glutamate receptor, ionotropic, kainate 2 (GRIK2), transcript variant 1, mRNA [NM_021956]                                      |
| MLLT3     | A_24_P192627   | 8.59E-03 | 2.35  | myeloid/lymphoid or mixed-lineage leukemia (trithorax homolog, Drosophila); translocated to, 3 | Homo sapiens myeloid/lymphoid or mixed-lineage leukemia (trithorax homolog, Drosophila); translocated to, 3 (MLLT3), mRNA [NM_004529]       |
| C20orf94  | A_23_P364766   | 8.60E-03 | 2.40  | chromosome 20 open reading frame 94                                                            | Homo sapiens chromosome 20 open reading frame 94 (C20orf94), mRNA [NM_001009608]                                                            |
| UBA7      | A_23_P21207    | 8.60E-03 | 2.36  | ubiquitin-like modifier activating enzyme 7                                                    | Homo sapiens ubiquitin-like modifier activating enzyme 7 (UBA7), mRNA [NM_003335]                                                           |
| FAM89A    | A_24_P418408   | 8.63E-03 | -2.43 | family with sequence similarity 89, member A                                                   | Homo sapiens family with sequence similarity 89, member A (FAM89A), mRNA [NM_198552]                                                        |
| CMAHP     | A_33_P3281567  | 8.69E-03 | 2.04  | cytidine monophospho-N-acetylneuraminic acid hydroxylase, pseudogene                           | Homo sapiens cytidine monophospho-N-acetylneuraminic acid hydroxylase, pseudogene (CMAHP), transcript variant 1, non-coding RNA [NR_002174] |
| CD1C      | A_33_P3273474  | 8.70E-03 | 3.41  | CD1c molecule                                                                                  | Homo sapiens CD1c molecule (CD1C), mRNA [NM_001765]                                                                                         |
| PSTPIP2   | A_24_P322353   | 8.71E-03 | 4.46  | proline-serine-threonine phosphatase interacting protein 2                                     | Homo sapiens proline-serine-threonine phosphatase interacting protein 2 (PSTPIP2), mRNA [NM_024430]                                         |

|           |               |          |       |                                                                                       |                                                                                                                                                    |
|-----------|---------------|----------|-------|---------------------------------------------------------------------------------------|----------------------------------------------------------------------------------------------------------------------------------------------------|
| TNFAIP3   | A_24_P157926  | 8.71E-03 | 4.49  | tumor necrosis factor, alpha-induced protein 3                                        | Homo sapiens tumor necrosis factor, alpha-induced protein 3 (TNFAIP3), mRNA [NM_006290]                                                            |
| P2RY2     | A_23_P24903   | 8.71E-03 | -3.56 | purinergic receptor P2Y, G-protein coupled, 2                                         | Homo sapiens purinergic receptor P2Y, G-protein coupled, 2 (P2RY2), transcript variant 1, mRNA [NM_176072]                                         |
| HESX1     | A_23_P121106  | 8.71E-03 | 3.26  | HESX homeobox 1                                                                       | Homo sapiens HESX homeobox 1 (HESX1), mRNA [NM_003865]                                                                                             |
| ERCC2     | A_24_P401990  | 8.71E-03 | -2.06 | excision repair cross-complementing rodent repair deficiency, complementation group 2 | Homo sapiens excision repair cross-complementing rodent repair deficiency, complementation group 2 (ERCC2), transcript variant 1, mRNA [NM_000400] |
| RAD1      | A_23_P144697  | 8.71E-03 | -2.02 | RAD1 homolog (S. pombe)                                                               | Homo sapiens RAD1 homolog (S. pombe) (RAD1), transcript variant 1, mRNA [NM_002853]                                                                |
| JMJD6     | A_23_P311616  | 8.76E-03 | -2.36 | jumonji domain containing 6                                                           | Homo sapiens jumonji domain containing 6 (JMJD6), transcript variant 2, mRNA [NM_015167]                                                           |
| PARP15    | A_33_P3316544 | 8.77E-03 | 4.38  | poly (ADP-ribose) polymerase family, member 15                                        | Homo sapiens poly (ADP-ribose) polymerase family, member 15 (PARP15), transcript variant 1, mRNA [NM_001113523]                                    |
| SLC40A1   | A_23_P102391  | 8.79E-03 | 2.04  | solute carrier family 40 (iron-regulated transporter), member 1                       | Homo sapiens solute carrier family 40 (iron-regulated transporter), member 1 (SLC40A1), mRNA [NM_014585]                                           |
| RARRES3   | A_23_P1962    | 8.92E-03 | 5.18  | retinoic acid receptor responder (tazarotene induced) 3                               | Homo sapiens retinoic acid receptor responder (tazarotene induced) 3 (RARRES3), mRNA [NM_004585]                                                   |
| LINC00174 | A_23_P397543  | 8.99E-03 | 4.74  | long intergenic non-protein coding RNA 174                                            | Homo sapiens long intergenic non-protein coding RNA 174 (LINC00174), non-coding RNA [NR_026873]                                                    |
| ATXN7L2   | A_23_P317207  | 9.00E-03 | -2.61 | ataxin 7-like 2                                                                       | Homo sapiens ataxin 7-like 2 (ATXN7L2), mRNA [NM_153340]                                                                                           |

|           |               |          |       |                                                 |                                                                                                           |
|-----------|---------------|----------|-------|-------------------------------------------------|-----------------------------------------------------------------------------------------------------------|
| CFP       | A_23_P22444   | 9.02E-03 | 3.52  | complement factor properdin                     | Homo sapiens complement factor properdin (CFP), transcript variant 1, mRNA [NM_002621]                    |
| TLCD1     | A_23_P420417  | 9.07E-03 | -2.43 | TLC domain containing 1                         | Homo sapiens TLC domain containing 1 (TLCD1), transcript variant 1, mRNA [NM_138463]                      |
| RHEBL1    | A_33_P3264895 | 9.14E-03 | 2.37  | Ras homolog enriched in brain like 1            | Homo sapiens Ras homolog enriched in brain like 1 (RHEBL1), mRNA [NM_144593]                              |
| ADRB1     | A_33_P3310189 | 9.15E-03 | -2.21 | adrenergic, beta-1-, receptor                   | Homo sapiens adrenergic, beta-1-, receptor (ADRB1), mRNA [NM_000684]                                      |
| SYNRG     | A_23_P396626  | 9.15E-03 | 2.15  | synergin, gamma                                 | Homo sapiens synergin, gamma (SYNRG), transcript variant 1, mRNA [NM_007247]                              |
| MTMR9LP   | A_33_P3354975 | 9.19E-03 | -2.23 | myotubularin related protein 9-like, pseudogene | Homo sapiens myotubularin related protein 9-like, pseudogene (MTMR9LP), non-coding RNA [NR_026850]        |
| UBE2QL1   | A_24_P479551  | 9.26E-03 | -2.35 | ubiquitin-conjugating enzyme E2Q family-like 1  | Homo sapiens ubiquitin-conjugating enzyme E2Q family-like 1 (UBE2QL1), mRNA [NM_001145161]                |
| RTKN2     | A_24_P13041   | 9.35E-03 | 3.81  | rhotekin 2                                      | Homo sapiens rhotekin 2 (RTKN2), mRNA [NM_145307]                                                         |
| COL3A1    | A_24_P935491  | 9.35E-03 | 3.54  | collagen, type III, alpha 1                     | Homo sapiens collagen, type III, alpha 1 (COL3A1), mRNA [NM_000090]                                       |
| RASL11B   | A_23_P69738   | 9.38E-03 | 5.97  | RAS-like, family 11, member B                   | Homo sapiens RAS-like, family 11, member B (RASL11B), mRNA [NM_023940]                                    |
| ZNRD1-AS1 | A_33_P3219840 | 9.42E-03 | 3.08  | ZNRD1 antisense RNA 1 (non-protein coding)      | Homo sapiens ZNRD1 antisense RNA 1 (non-protein coding) (ZNRD1-AS1), non-coding RNA [NR_026751]           |
| LARP6     | A_23_P117782  | 9.44E-03 | -2.14 | La ribonucleoprotein domain family, member 6    | Homo sapiens La ribonucleoprotein domain family, member 6 (LARP6), transcript variant 1, mRNA [NM_018357] |

|             |                |          |       |                                                                               |                                                                                                                                            |
|-------------|----------------|----------|-------|-------------------------------------------------------------------------------|--------------------------------------------------------------------------------------------------------------------------------------------|
| SLA2        | A_23_P143173   | 9.49E-03 | 5.03  | Src-like-adaptor 2                                                            | Homo sapiens Src-like-adaptor 2 (SLA2), transcript variant 1, mRNA [NM_032214]                                                             |
| XLOC_002049 | A_19_P00320954 | 9.49E-03 | -2.30 |                                                                               | DB092735 TESTI4 Homo sapiens cDNA clone TESTI4042456 5', mRNA sequence [DB092735]                                                          |
| CEP164      | A_23_P75609    | 9.49E-03 | 2.03  | centrosomal protein 164kDa                                                    | Homo sapiens centrosomal protein 164kDa (CEP164), mRNA [NM_014956]                                                                         |
| PAPLN       | A_23_P333640   | 9.52E-03 | 4.58  | papilin, proteoglycan-like sulfated glycoprotein                              | Homo sapiens papilin, proteoglycan-like sulfated glycoprotein (PAPLN), mRNA [NM_173462]                                                    |
| IKBKE       | A_23_P887      | 9.52E-03 | 2.68  | inhibitor of kappa light polypeptide gene enhancer in B-cells, kinase epsilon | Homo sapiens inhibitor of kappa light polypeptide gene enhancer in B-cells, kinase epsilon (IKBKE), transcript variant 1, mRNA [NM_014002] |
| C11orf65    | A_23_P418485   | 9.52E-03 | 2.39  | chromosome 11 open reading frame 65                                           | Homo sapiens chromosome 11 open reading frame 65 (C11orf65), mRNA [NM_152587]                                                              |
| CXCR2P1     | A_33_P3375859  | 9.56E-03 | 18.38 | chemokine (C-X-C motif) receptor 2 pseudogene 1                               | Homo sapiens chemokine (C-X-C motif) receptor 2 pseudogene 1 (CXCR2P1), non-coding RNA [NR_002712]                                         |
| KRTAP3-3    | A_33_P3411315  | 9.58E-03 | -3.73 | keratin associated protein 3-3                                                | Homo sapiens keratin associated protein 3-3 (KRTAP3-3), mRNA [NM_033185]                                                                   |
| C1QTNF2     | A_33_P3403153  | 9.61E-03 | 3.72  | C1q and tumor necrosis factor related protein 2                               | Homo sapiens C1q and tumor necrosis factor related protein 2 (C1QTNF2), mRNA [NM_031908]                                                   |
| SAMSN1      | A_23_P29005    | 9.63E-03 | 7.42  | SAM domain, SH3 domain and nuclear localization signals 1                     | Homo sapiens SAM domain, SH3 domain and nuclear localization signals 1 (SAMSN1), mRNA [NM_022136]                                          |
| IL15RA      | A_33_P3399268  | 9.63E-03 | -2.95 | interleukin 15 receptor, alpha                                                | interleukin 15 receptor, alpha [Source:HGNC Symbol;Acc:5978] [ENST00000379971]                                                             |
| CTSK        | A_23_P34744    | 9.64E-03 | 2.97  | cathepsin K                                                                   | Homo sapiens cathepsin K (CTSK), mRNA [NM_000396]                                                                                          |

|              |               |          |       |                                                           |                                                                                                             |
|--------------|---------------|----------|-------|-----------------------------------------------------------|-------------------------------------------------------------------------------------------------------------|
| MNDA         | A_23_P137935  | 9.70E-03 | 5.02  | myeloid cell nuclear differentiation antigen              | Homo sapiens myeloid cell nuclear differentiation antigen (MNDA), mRNA [NM_002432]                          |
| KRT86        | A_23_P363769  | 9.70E-03 | 3.31  | keratin 86                                                | Homo sapiens keratin 86 (KRT86), mRNA [NM_002284]                                                           |
| HRH2         | A_23_P7535    | 9.70E-03 | -2.08 | histamine receptor H2                                     | Homo sapiens histamine receptor H2 (HRH2), transcript variant 2, mRNA [NM_022304]                           |
| LOC100507199 | A_33_P3407863 | 9.70E-03 | -2.07 | uncharacterized LOC100507199                              | PREDICTED: Homo sapiens hypothetical LOC100507199, transcript variant 1 (LOC100507199), miscRNA [XR_110934] |
| ERN1         | A_23_P164042  | 9.75E-03 | 2.95  | endoplasmic reticulum to nucleus signaling 1              | Homo sapiens endoplasmic reticulum to nucleus signaling 1 (ERN1), mRNA [NM_001433]                          |
| RPL27A       | A_23_P416305  | 9.79E-03 | -3.47 | ribosomal protein L27a                                    | Homo sapiens ribosomal protein L27a (RPL27A), mRNA [NM_000990]                                              |
| NACC2        | A_23_P113825  | 9.83E-03 | -2.61 | NACC family member 2, BEN and BTB (POZ) domain containing | Homo sapiens NACC family member 2, BEN and BTB (POZ) domain containing (NACC2), mRNA [NM_144653]            |
| MOG          | A_33_P3391791 | 9.83E-03 | -5.28 | myelin oligodendrocyte glycoprotein                       | Homo sapiens myelin oligodendrocyte glycoprotein (MOG), transcript variant alpha1, mRNA [NM_206809]         |
| C6orf192     | A_23_P134113  | 9.87E-03 | 2.12  | chromosome 6 open reading frame 192                       | Homo sapiens chromosome 6 open reading frame 192 (C6orf192), mRNA [NM_052831]                               |
| RRAD         | A_24_P262127  | 9.87E-03 | -7.91 | Ras-related associated with diabetes                      | Homo sapiens Ras-related associated with diabetes (RRAD), transcript variant 2, mRNA [NM_004165]            |
| RAB7B        | A_23_P252541  | 9.87E-03 | 3.75  | RAB7B, member RAS oncogene family                         | Homo sapiens RAB7B, member RAS oncogene family (RAB7B), transcript variant 1, mRNA [NM_177403]              |
| ATP8B2       | A_24_P366749  | 9.90E-03 | 2.77  | ATPase, class I, type 8B, member 2                        | Homo sapiens ATPase, class I, type 8B, member 2 (ATP8B2), transcript variant 2,                             |

|           |               |          |        |                                          |                                                                                                          |
|-----------|---------------|----------|--------|------------------------------------------|----------------------------------------------------------------------------------------------------------|
| LOC283861 | A_33_P3577142 | 1.00E-02 | 2.81   | uncharacterized LOC283861                | mRNA [NM_001005855]<br>Homo sapiens cDNA FLJ40824 fis, clone TRACH2011113. [AK098143]                    |
| WSCD1     | A_24_P942493  | 1.00E-02 | -3.32  | WSC domain containing 1                  | Homo sapiens WSC domain containing 1 (WSCD1), mRNA [NM_015253]                                           |
| C6orf174  | A_33_P3284453 | 1.01E-02 | 4.47   | chromosome 6 open reading frame 174      | Homo sapiens chromosome 6 open reading frame 174 (C6orf174), mRNA [NM_001012279]                         |
| BCAR1     | A_33_P3369034 | 1.01E-02 | -2.28  | breast cancer anti-estrogen resistance 1 | Homo sapiens breast cancer anti-estrogen resistance 1 (BCAR1), transcript variant 1, mRNA [NM_001170714] |
| ADAM11    | A_33_P3386775 | 1.01E-02 | -3.33  | ADAM metallopeptidase domain 11          | Homo sapiens ADAM metallopeptidase domain 11 (ADAM11), mRNA [NM_002390]                                  |
| ANKRD44   | A_23_P209347  | 1.01E-02 | 3.17   | ankyrin repeat domain 44                 | Homo sapiens ankyrin repeat domain 44 (ANKRD44), transcript variant B, mRNA [NM_153697]                  |
| USP2      | A_24_P107317  | 1.01E-02 | -2.01  | ubiquitin specific peptidase 2           | Homo sapiens ubiquitin specific peptidase 2 (USP2), transcript variant 1, mRNA [NM_004205]               |
| CBLN3     | A_33_P3412900 | 1.01E-02 | 2.79   | cerebellin 3 precursor                   | Homo sapiens cerebellin 3 precursor (CBLN3), mRNA [NM_001039771]                                         |
| YPEL1     | A_32_P88120   | 1.01E-02 | 2.10   | yippee-like 1 (Drosophila)               | Homo sapiens yippee-like 1 (Drosophila) (YPEL1), mRNA [NM_013313]                                        |
| DNASE1    | A_23_P66311   | 1.01E-02 | 2.07   | deoxyribonuclease I                      | Homo sapiens deoxyribonuclease I (DNASE1), mRNA [NM_005223]                                              |
| STXBP2    | A_33_P3388835 | 1.02E-02 | 3.47   | syntaxin binding protein 2               | Homo sapiens syntaxin binding protein 2 (STXBP2), transcript variant 1, mRNA [NM_006949]                 |
| LOC285556 | A_33_P3411155 | 1.02E-02 | -40.89 | uncharacterized LOC285556                | PREDICTED: Homo sapiens hypothetical protein LOC285556 (LOC285556), mRNA [XM_001717423]                  |
| FLT3      | A_23_P99442   | 1.02E-02 | 5.91   | fms-related tyrosine kinase 3            | Homo sapiens fms-related tyrosine                                                                        |

|              |                |          |       |                                             |                                                                                                                                        |
|--------------|----------------|----------|-------|---------------------------------------------|----------------------------------------------------------------------------------------------------------------------------------------|
| NLRC4        | A_23_P119835   | 1.02E-02 | 5.29  | NLR family, CARD domain containing 4        | kinase 3 (FLT3), mRNA [NM_004119]<br>Homo sapiens NLR family, CARD domain containing 4 (NLRC4), transcript variant 1, mRNA [NM_021209] |
| ASB2         | A_23_P205370   | 1.02E-02 | -2.12 | ankyrin repeat and SOCS box containing 2    | Homo sapiens ankyrin repeat and SOCS box containing 2 (ASB2), transcript variant 2, mRNA [NM_016150]                                   |
| GPR45        | A_23_P131534   | 1.02E-02 | -2.12 | G protein-coupled receptor 45               | Homo sapiens G protein-coupled receptor 45 (GPR45), mRNA [NM_007227]                                                                   |
| MAGEB1       | A_23_P217341   | 1.03E-02 | -4.17 | melanoma antigen family B, 1                | Homo sapiens melanoma antigen family B, 1 (MAGEB1), transcript variant 1, mRNA [NM_002363]                                             |
| CARD9        | A_23_P500433   | 1.03E-02 | 4.85  | caspase recruitment domain family, member 9 | Homo sapiens caspase recruitment domain family, member 9 (CARD9), transcript variant 1, mRNA [NM_052813]                               |
| SNX22        | A_33_P3391517  | 1.03E-02 | -3.04 | sorting nexin 22                            | sorting nexin 22 [Source:HGNC Symbol;Acc:16315] [ENST00000380278]                                                                      |
| RP1-177G6.2  | A_33_P3343820  | 1.03E-02 | -2.65 | uncharacterized LOC286411                   | Homo sapiens uncharacterized LOC286411 (RP1-177G6.2), transcript variant 1, non-coding RNA [NR_028344]                                 |
| GMFG         | A_23_P208866   | 1.03E-02 | 3.04  | glia maturation factor, gamma               | Homo sapiens glia maturation factor, gamma (GMFG), mRNA [NM_004877]                                                                    |
| ARRDC3       | A_24_P274615   | 1.05E-02 | 2.96  | arrestin domain containing 3                | Homo sapiens arrestin domain containing 3 (ARRDC3), mRNA [NM_020801]                                                                   |
| LOC100130691 | A_19_P00315584 | 1.05E-02 | 2.15  | uncharacterized LOC100130691                | Homo sapiens uncharacterized LOC100130691 (LOC100130691), non-coding RNA [NR_026966]                                                   |
| PTAFR        | A_24_P102821   | 1.05E-02 | 4.43  | platelet-activating factor receptor         | Homo sapiens platelet-activating factor receptor (PTAFR), transcript variant 3, mRNA [NM_000952]                                       |
| FREM1        | A_23_P43337    | 1.05E-02 | 3.33  | FRAS1 related extracellular                 | Homo sapiens FRAS1 related                                                                                                             |

|          |               |          |       |                                                                   |                                                                                                                                                                                                 |
|----------|---------------|----------|-------|-------------------------------------------------------------------|-------------------------------------------------------------------------------------------------------------------------------------------------------------------------------------------------|
| TNFRSF19 | A_23_P140057  | 1.05E-02 | -2.87 | matrix 1<br>tumor necrosis factor receptor superfamily, member 19 | extracellular matrix 1 (FREM1), transcript variant 1, mRNA [NM_144966]<br>Homo sapiens tumor necrosis factor receptor superfamily, member 19 (TNFRSF19), transcript variant 1, mRNA [NM_018647] |
| STAB1    | A_23_P32500   | 1.07E-02 | 2.55  | stabilin 1                                                        | Homo sapiens stabilin 1 (STAB1), mRNA [NM_015136]                                                                                                                                               |
| COL5A2   | A_23_P33196   | 1.07E-02 | 2.43  | collagen, type V, alpha 2                                         | Homo sapiens collagen, type V, alpha 2 (COL5A2), mRNA [NM_000393]                                                                                                                               |
| REEP4    | A_23_P96209   | 1.07E-02 | 2.19  | receptor accessory protein 4                                      | Homo sapiens receptor accessory protein 4 (REEP4), mRNA [NM_025232]                                                                                                                             |
| MR1      | A_23_P74928   | 1.07E-02 | 2.29  | major histocompatibility complex, class I-related                 | Homo sapiens major histocompatibility complex, class I-related (MR1), transcript variant 1, mRNA [NM_001531]                                                                                    |
| SIDT1    | A_23_P132515  | 1.07E-02 | 4.25  | SID1 transmembrane family, member 1                               | Homo sapiens SID1 transmembrane family, member 1 (SIDT1), mRNA [NM_017699]                                                                                                                      |
| GLTPD1   | A_33_P3266396 | 1.07E-02 | -2.13 | glycolipid transfer protein domain containing 1                   | Homo sapiens glycolipid transfer protein domain containing 1 (GLTPD1), mRNA [NM_001029885]                                                                                                      |
| ZNF812   | A_32_P33434   | 1.08E-02 | 3.35  | zinc finger protein 812                                           | Homo sapiens zinc finger protein 812 (ZNF812), mRNA [NM_001199814]                                                                                                                              |
| ATHL1    | A_23_P98686   | 1.08E-02 | 2.57  | ATH1, acid trehalase-like 1 (yeast)                               | Homo sapiens ATH1, acid trehalase-like 1 (yeast) (ATHL1), mRNA [NM_025092]                                                                                                                      |
| CASC2    | A_33_P3213362 | 1.08E-02 | 4.76  | cancer susceptibility candidate 2 (non-protein coding)            | Homo sapiens cancer susceptibility candidate 2 (non-protein coding) (CASC2), transcript variant 1, non-coding RNA [NR_026939]                                                                   |
| HAAO     | A_33_P3244122 | 1.08E-02 | 3.94  | 3-hydroxyanthranilate 3,4-dioxygenase                             | Homo sapiens 3-hydroxyanthranilate 3,4-dioxygenase (HAAO), mRNA [NM_012205]                                                                                                                     |
| CD1E     | A_23_P310410  | 1.09E-02 | 5.13  | CD1e molecule                                                     | Homo sapiens CD1e molecule (CD1E),                                                                                                                                                              |

|           |               |          |       |                                                                                 |                                                                                                                                                                                              |
|-----------|---------------|----------|-------|---------------------------------------------------------------------------------|----------------------------------------------------------------------------------------------------------------------------------------------------------------------------------------------|
| MYCL1     | A_33_P3306068 | 1.09E-02 | 6.23  | v-myc myelocytomatosis viral oncogene homolog 1, lung carcinoma derived (avian) | transcript variant 2, mRNA [NM_001042583]<br>Homo sapiens v-myc myelocytomatosis viral oncogene homolog 1, lung carcinoma derived (avian) (MYCL1), transcript variant 1, mRNA [NM_001033081] |
| IGF1      | A_23_P13907   | 1.09E-02 | 2.72  | insulin-like growth factor 1 (somatomedin C)                                    | Homo sapiens insulin-like growth factor 1 (somatomedin C) (IGF1), transcript variant 4, mRNA [NM_000618]                                                                                     |
| CACNA1B   | A_33_P3280114 | 1.09E-02 | -3.42 | calcium channel, voltage-dependent, N type, alpha 1B subunit                    | calcium channel, voltage-dependent, N type, alpha 1B subunit [Source:HGNC Symbol;Acc:1389] [ENST00000371365]                                                                                 |
| LINC00173 | A_33_P3331511 | 1.10E-02 | 3.47  | long intergenic non-protein coding RNA 173                                      | Homo sapiens long intergenic non-protein coding RNA 173 (LINC00173), transcript variant 1, non-coding RNA [NR_027345]                                                                        |
| MARVELD1  | A_23_P138725  | 1.10E-02 | 2.18  | MARVEL domain containing 1                                                      | Homo sapiens MARVEL domain containing 1 (MARVELD1), mRNA [NM_031484]                                                                                                                         |
| PRB1      | A_33_P3258593 | 1.10E-02 | -2.37 | proline-rich protein BstNI subfamily 1                                          | Homo sapiens proline-rich protein BstNI subfamily 1 (PRB1), transcript variant 1, mRNA [NM_005039]                                                                                           |
| F13A1     | A_33_P3416097 | 1.10E-02 | 2.61  | coagulation factor XIII, A1 polypeptide                                         | Homo sapiens coagulation factor XIII, A1 polypeptide (F13A1), mRNA [NM_000129]                                                                                                               |
| C5        | A_23_P71855   | 1.11E-02 | 3.81  | complement component 5                                                          | Homo sapiens complement component 5 (C5), mRNA [NM_001735]                                                                                                                                   |
| HCP5      | A_24_P17870   | 1.11E-02 | 2.87  | HLA complex P5 (non-protein coding)                                             | Homo sapiens HLA complex P5 (non-protein coding) (HCP5), non-coding RNA [NR_040662]                                                                                                          |
| C1orf35   | A_33_P3263523 | 1.11E-02 | 2.28  | chromosome 1 open reading frame 35                                              | Homo sapiens chromosome 1 open reading frame 35 (C1orf35), mRNA                                                                                                                              |

|             |                |          |       |                                                                            |                                                                                                                                           |
|-------------|----------------|----------|-------|----------------------------------------------------------------------------|-------------------------------------------------------------------------------------------------------------------------------------------|
| SUSD5       | A_24_P238131   | 1.11E-02 | 2.63  | sushi domain containing 5                                                  | [NM_024319]<br>Homo sapiens sushi domain containing 5 (SUSD5), mRNA [NM_015551]                                                           |
| MID1IP1     | A_33_P3217465  | 1.11E-02 | -3.59 | MID1 interacting protein 1 (gastrulation specific G12 homolog (zebrafish)) | Homo sapiens MID1 interacting protein 1 (gastrulation specific G12 homolog (zebrafish)) (MID1IP1), transcript variant 1, mRNA [NM_021242] |
| LAMP3       | A_23_P29773    | 1.12E-02 | 14.05 | lysosomal-associated membrane protein 3                                    | Homo sapiens lysosomal-associated membrane protein 3 (LAMP3), mRNA [NM_014398]                                                            |
| NUP210      | A_23_P212159   | 1.12E-02 | 4.33  | nucleoporin 210kDa                                                         | Homo sapiens nucleoporin 210kDa (NUP210), mRNA [NM_024923]                                                                                |
| RLN2        | A_23_P216455   | 1.12E-02 | 3.77  | relaxin 2                                                                  | Homo sapiens relaxin 2 (RLN2), transcript variant 2, mRNA [NM_005059]                                                                     |
| XLOC_003641 | A_19_P00804922 | 1.12E-02 | -2.64 |                                                                            | BROAD Institute lincRNA (XLOC_003641), lincRNA [TCONS_00008193]                                                                           |
| C1QTNF7     | A_32_P190769   | 1.12E-02 | 7.08  | C1q and tumor necrosis factor related protein 7                            | Homo sapiens C1q and tumor necrosis factor related protein 7 (C1QTNF7), transcript variant 3, mRNA [NM_031911]                            |
| C16orf89    | A_33_P3296862  | 1.13E-02 | 5.38  | chromosome 16 open reading frame 89                                        | Homo sapiens chromosome 16 open reading frame 89 (C16orf89), transcript variant 1, mRNA [NM_152459]                                       |
| LRRC4C      | A_23_P24457    | 1.13E-02 | 3.19  | leucine rich repeat containing 4C                                          | Homo sapiens leucine rich repeat containing 4C (LRRC4C), mRNA [NM_020929]                                                                 |
| SLC43A3     | A_24_P406986   | 1.13E-02 | -2.01 | solute carrier family 43, member 3                                         | Homo sapiens solute carrier family 43, member 3 (SLC43A3), mRNA [NM_199329]                                                               |
| TMEM132E    | A_33_P3287108  | 1.14E-02 | 4.13  | transmembrane protein 132E                                                 | Homo sapiens transmembrane protein 132E (TMEM132E), mRNA [NM_207313]                                                                      |
| DEFB128     | A_33_P3272962  | 1.14E-02 | -3.19 | defensin, beta 128                                                         | Homo sapiens defensin, beta 128 (DEFB128), mRNA [NM_001037732]                                                                            |

|              |               |          |       |                                                                            |                                                                                                                                          |
|--------------|---------------|----------|-------|----------------------------------------------------------------------------|------------------------------------------------------------------------------------------------------------------------------------------|
| LOC100131733 | A_32_P56249   | 1.15E-02 | 5.94  | uncharacterized LOC100131733                                               | Homo sapiens uncharacterized LOC100131733 (LOC100131733), non-coding RNA [NR_038996]                                                     |
| MXRA8        | A_24_P353905  | 1.15E-02 | 2.33  | matrix-remodelling associated 8                                            | Homo sapiens matrix-remodelling associated 8 (MXRA8), mRNA [NM_032348]                                                                   |
| CD19         | A_23_P113572  | 1.15E-02 | 8.23  | CD19 molecule                                                              | Homo sapiens CD19 molecule (CD19), transcript variant 2, mRNA [NM_001770]                                                                |
| FKBP11       | A_33_P3267296 | 1.15E-02 | 4.93  | FK506 binding protein 11, 19 kDa                                           | Homo sapiens FK506 binding protein 11, 19 kDa (FKBP11), transcript variant 1, mRNA [NM_016594]                                           |
| IL12RB1      | A_23_P399156  | 1.15E-02 | 2.88  | interleukin 12 receptor, beta 1                                            | Homo sapiens interleukin 12 receptor, beta 1 (IL12RB1), transcript variant 2, mRNA [NM_153701]                                           |
| C5orf46      | A_33_P3392052 | 1.16E-02 | 5.85  | chromosome 5 open reading frame 46                                         | Homo sapiens chromosome 5 open reading frame 46 (C5orf46), mRNA [NM_206966]                                                              |
| LOC100128019 | A_33_P3259960 | 1.16E-02 | 3.39  | uncharacterized LOC100128019                                               | Homo sapiens cDNA FLJ43591 fis, clone SMINT2002743. [AK125579]                                                                           |
| LOC100129098 | A_33_P3417432 | 1.17E-02 | -2.72 | uncharacterized LOC100129098                                               | PREDICTED: Homo sapiens hypothetical protein LOC100129098 (LOC100129098), mRNA [XM_001714893]                                            |
| MICAL1       | A_24_P283341  | 1.17E-02 | 2.16  | microtubule associated monooxygenase, calponin and LIM domain containing 1 | Homo sapiens microtubule associated monooxygenase, calponin and LIM domain containing 1 (MICAL1), transcript variant 1, mRNA [NM_022765] |
| ICAM4        | A_33_P3363355 | 1.17E-02 | 2.94  | intercellular adhesion molecule 4 (Landsteiner-Wiener blood group)         | Homo sapiens intercellular adhesion molecule 4 (Landsteiner-Wiener blood group) (ICAM4), transcript variant 2, mRNA [NM_022377]          |
| SPATA18      | A_23_P407112  | 1.17E-02 | 2.69  | spermatogenesis associated 18 homolog (rat)                                | Homo sapiens spermatogenesis associated 18 homolog (rat) (SPATA18), mRNA [NM_145263]                                                     |

|           |               |          |       |                                                    |                                                                                                                 |
|-----------|---------------|----------|-------|----------------------------------------------------|-----------------------------------------------------------------------------------------------------------------|
| NPAS3     | A_23_P2942    | 1.17E-02 | 2.29  | neuronal PAS domain protein 3                      | Homo sapiens neuronal PAS domain protein 3 (NPAS3), transcript variant 2, mRNA [NM_022123]                      |
| KIF26B    | A_33_P3396746 | 1.18E-02 | -2.85 | kinesin family member 26B                          | kinesin family member 26B [Source:HGNC Symbol;Acc:25484] [ENST00000479506]                                      |
| LOC386597 | A_33_P3519424 | 1.18E-02 | -3.06 | uncharacterized LOC386597                          | Homo sapiens cDNA FLJ32573 fis, clone SPLEN2000210. [AK057135]                                                  |
| MS4A1     | A_33_P3406567 | 1.19E-02 | 5.12  | membrane-spanning 4-domains, subfamily A, member 1 | Homo sapiens membrane-spanning 4-domains, subfamily A, member 1 (MS4A1), transcript variant 1, mRNA [NM_152866] |
| EBI3      | A_23_P119478  | 1.19E-02 | 5.27  | Epstein-Barr virus induced 3                       | Homo sapiens Epstein-Barr virus induced 3 (EBI3), mRNA [NM_005755]                                              |
| KIF21B    | A_23_P126888  | 1.20E-02 | 2.69  | kinesin family member 21B                          | Homo sapiens kinesin family member 21B (KIF21B), transcript variant 2, mRNA [NM_017596]                         |
| IGSF22    | A_32_P486620  | 1.20E-02 | -3.58 | immunoglobulin superfamily, member 22              | Homo sapiens immunoglobulin superfamily, member 22 (IGSF22), mRNA [NM_173588]                                   |
| NBPF6     | A_33_P3229328 | 1.21E-02 | 2.06  | neuroblastoma breakpoint family, member 6          | Homo sapiens neuroblastoma breakpoint family, member 6 (NBPF6), transcript variant 2, mRNA [NM_001143988]       |
| HMOX2     | A_23_P100501  | 1.21E-02 | -2.47 | heme oxygenase (decycling) 2                       | Homo sapiens heme oxygenase (decycling) 2 (HMOX2), transcript variant 3, mRNA [NM_002134]                       |
| BOC       | A_23_P257763  | 1.21E-02 | 2.25  | Boc homolog (mouse)                                | Homo sapiens Boc homolog (mouse) (BOC), mRNA [NM_033254]                                                        |
| OGN       | A_33_P3279590 | 1.23E-02 | 6.98  | osteoglycin                                        | Homo sapiens osteoglycin (OGN), transcript variant 1, mRNA [NM_033014]                                          |
| ZNF214    | A_23_P127840  | 1.23E-02 | 3.15  | zinc finger protein 214                            | Homo sapiens zinc finger protein 214 (ZNF214), mRNA [NM_013249]                                                 |

|          |               |          |       |                                                                                     |                                                                                                                                                        |
|----------|---------------|----------|-------|-------------------------------------------------------------------------------------|--------------------------------------------------------------------------------------------------------------------------------------------------------|
| SERPINA1 | A_23_P218111  | 1.23E-02 | 4.65  | serpin peptidase inhibitor, clade A (alpha-1 antiproteinase, antitrypsin), member 1 | Homo sapiens serpin peptidase inhibitor, clade A (alpha-1 antiproteinase, antitrypsin), member 1 (SERPINA1), transcript variant 2, mRNA [NM_001002236] |
| ZNF215   | A_33_P3310981 | 1.23E-02 | 6.07  | zinc finger protein 215                                                             | Homo sapiens zinc finger protein 215 (ZNF215), mRNA [NM_013250]                                                                                        |
| TRPC4    | A_23_P105873  | 1.23E-02 | -2.68 | transient receptor potential cation channel, subfamily C, member 4                  | Homo sapiens transient receptor potential cation channel, subfamily C, member 4 (TRPC4), transcript variant alpha, mRNA [NM_016179]                    |
| SPINK5   | A_33_P3391126 | 1.23E-02 | 4.84  | serine peptidase inhibitor, Kazal type 5                                            | Homo sapiens serine peptidase inhibitor, Kazal type 5 (SPINK5), transcript variant 1, mRNA [NM_001127698]                                              |
| TRGV7    | A_33_P3638471 | 1.23E-02 | 4.01  | T cell receptor gamma variable 7 (pseudogene)                                       | Homo sapiens T cell receptor gamma variable 7 pseudogene, mRNA (cDNA clone IMAGE:5210958). [BC027954]                                                  |
| FAM115C  | A_24_P237912  | 1.24E-02 | 2.27  | family with sequence similarity 115, member C                                       | Homo sapiens family with sequence similarity 115, member C (FAM115C), transcript variant 3, mRNA [NM_001130026]                                        |
| GPR65    | A_23_P14564   | 1.24E-02 | 5.06  | G protein-coupled receptor 65                                                       | Homo sapiens G protein-coupled receptor 65 (GPR65), mRNA [NM_003608]                                                                                   |
| PPIL1    | A_23_P133995  | 1.25E-02 | -2.03 | peptidylprolyl isomerase (cyclophilin)-like 1                                       | Homo sapiens peptidylprolyl isomerase (cyclophilin)-like 1 (PPIL1), mRNA [NM_016059]                                                                   |
| GINS2    | A_23_P118246  | 1.25E-02 | 2.70  | GINS complex subunit 2 (Psf2 homolog)                                               | Homo sapiens GINS complex subunit 2 (Psf2 homolog) (GINS2), mRNA [NM_016095]                                                                           |
| ZNF169   | A_33_P3421365 | 1.25E-02 | 2.02  | zinc finger protein 169                                                             | Homo sapiens zinc finger protein 169 (ZNF169), mRNA [NM_194320]                                                                                        |
| KIAA0513 | A_23_P206310  | 1.25E-02 | 2.03  | KIAA0513                                                                            | Homo sapiens KIAA0513 (KIAA0513),                                                                                                                      |

|           |                |          |       |                                                                                     |                                                                                                                               |
|-----------|----------------|----------|-------|-------------------------------------------------------------------------------------|-------------------------------------------------------------------------------------------------------------------------------|
| ACSM1     | A_23_P106933   | 1.26E-02 | 3.47  | acyl-CoA synthetase medium-chain family member 1                                    | mRNA [NM_014732]<br>Homo sapiens acyl-CoA synthetase medium-chain family member 1 (ACSM1), mRNA [NM_052956]                   |
| CXorf57   | A_23_P96369    | 1.26E-02 | 3.24  | chromosome X open reading frame 57                                                  | Homo sapiens chromosome X open reading frame 57 (CXorf57), transcript variant 1, mRNA [NM_018015]                             |
| LOC645431 | A_23_P327156   | 1.26E-02 | 2.23  | uncharacterized LOC645431                                                           | Homo sapiens uncharacterized LOC645431 (LOC645431), non-coding RNA [NR_024334]                                                |
| PLEKHH2   | A_33_P3315719  | 1.26E-02 | 2.91  | pleckstrin homology domain containing, family H (with MyTH4 domain) member 2        | Homo sapiens pleckstrin homology domain containing, family H (with MyTH4 domain) member 2 (PLEKHH2), mRNA [NM_172069]         |
| IL18      | A_23_P104798   | 1.27E-02 | 4.81  | interleukin 18 (interferon-gamma-inducing factor)                                   | Homo sapiens interleukin 18 (interferon-gamma-inducing factor) (IL18), transcript variant 1, mRNA [NM_001562]                 |
| STARD10   | A_23_P36345    | 1.27E-02 | -2.70 | StAR-related lipid transfer (START) domain containing 10                            | Homo sapiens StAR-related lipid transfer (START) domain containing 10 (STARD10), mRNA [NM_006645]                             |
| SERPINA6  | A_23_P117363   | 1.28E-02 | -2.85 | serpin peptidase inhibitor, clade A (alpha-1 antiproteinase, antitrypsin), member 6 | Homo sapiens serpin peptidase inhibitor, clade A (alpha-1 antiproteinase, antitrypsin), member 6 (SERPINA6), mRNA [NM_001756] |
| SCARNA5   | A_33_P3363082  | 1.28E-02 | 3.03  | small Cajal body-specific RNA 5                                                     | Homo sapiens small Cajal body-specific RNA 5 (SCARNA5), guide RNA [NR_003008]                                                 |
| Q8YNJ1    | A_19_P00322166 | 1.28E-02 | 2.97  |                                                                                     | Q8YNJ1_ANASP (Q8YNJ1) Permease protein of phosphate ABC transporter, partial (6%) [THC2671932]                                |
| TUSC1     | A_32_P133884   | 1.28E-02 | -2.11 | tumor suppressor candidate 1                                                        | Homo sapiens tumor suppressor candidate 1 (TUSC1), mRNA [NM_001004125]                                                        |

|          |               |          |       |                                                                                  |                                                                                                                                                |
|----------|---------------|----------|-------|----------------------------------------------------------------------------------|------------------------------------------------------------------------------------------------------------------------------------------------|
| ITGAX    | A_23_P312132  | 1.28E-02 | 6.81  | integrin, alpha X (complement component 3 receptor 4 subunit)                    | Homo sapiens integrin, alpha X (complement component 3 receptor 4 subunit) (ITGAX), mRNA [NM_000887]                                           |
| ZMAT1    | A_24_P11100   | 1.28E-02 | 3.30  | zinc finger, matrin-type 1                                                       | Homo sapiens zinc finger, matrin-type 1 (ZMAT1), transcript variant 1, mRNA [NM_001011657]                                                     |
| TRAF5    | A_23_P201731  | 1.28E-02 | 2.39  | TNF receptor-associated factor 5                                                 | Homo sapiens TNF receptor-associated factor 5 (TRAF5), transcript variant 1, mRNA [NM_004619]                                                  |
| IL18RAP  | A_23_P28334   | 1.28E-02 | 5.96  | interleukin 18 receptor accessory protein                                        | Homo sapiens interleukin 18 receptor accessory protein (IL18RAP), mRNA [NM_003853]                                                             |
| HLA-DMA  | A_23_P42306   | 1.29E-02 | 3.21  | major histocompatibility complex, class II, DM alpha                             | Homo sapiens major histocompatibility complex, class II, DM alpha (HLA-DMA), mRNA [NM_006120]                                                  |
| LTC4S    | A_24_P397294  | 1.29E-02 | 3.19  | leukotriene C4 synthase                                                          | Homo sapiens leukotriene C4 synthase (LTC4S), mRNA [NM_145867]                                                                                 |
| SLITRK4  | A_32_P131640  | 1.29E-02 | 5.22  | SLIT and NTRK-like family, member 4                                              | Homo sapiens SLIT and NTRK-like family, member 4 (SLITRK4), transcript variant 2, mRNA [NM_173078]                                             |
| HES6     | A_33_P3265359 | 1.29E-02 | -3.30 | hairy and enhancer of split 6 (Drosophila)                                       | Homo sapiens hairy and enhancer of split 6 (Drosophila) (HES6), transcript variant 1, mRNA [NM_018645]                                         |
| CACNA2D3 | A_33_P3373259 | 1.29E-02 | -2.56 | calcium channel, voltage-dependent, alpha 2/delta subunit 3                      | Homo sapiens calcium channel, voltage-dependent, alpha 2/delta subunit 3 (CACNA2D3), mRNA [NM_018398]                                          |
| PLA2G7   | A_23_P145096  | 1.29E-02 | 8.25  | phospholipase A2, group VII (platelet-activating factor acetylhydrolase, plasma) | Homo sapiens phospholipase A2, group VII (platelet-activating factor acetylhydrolase, plasma) (PLA2G7), transcript variant 1, mRNA [NM_005084] |
| PGBD2    | A_33_P3286608 | 1.29E-02 | 2.10  | piggyBac transposable element derived 2                                          | Homo sapiens piggyBac transposable element derived 2 (PGBD2), transcript variant 1, mRNA [NM_170725]                                           |

|         |               |          |       |                                               |                                                                                                            |
|---------|---------------|----------|-------|-----------------------------------------------|------------------------------------------------------------------------------------------------------------|
| OSBPL3  | A_23_P215525  | 1.30E-02 | 2.47  | oxysterol binding protein-like 3              | Homo sapiens oxysterol binding protein-like 3 (OSBPL3), transcript variant 1, mRNA [NM_015550]             |
| TMSB4X  | A_24_P374516  | 1.31E-02 | 2.04  | thymosin beta 4, X-linked                     | Homo sapiens thymosin beta 4, X-linked (TMSB4X), mRNA [NM_021109]                                          |
| FAM125A | A_33_P3291732 | 1.32E-02 | 2.97  | family with sequence similarity 125, member A | family with sequence similarity 125, member A [Source:HGNC Symbol;Acc:25153] [ENST00000529490]             |
| CYBA    | A_33_P3372332 | 1.32E-02 | 2.69  | cytochrome b-245, alpha polypeptide           | Homo sapiens cytochrome b-245, alpha polypeptide (CYBA), mRNA [NM_000101]                                  |
| CDRT3   | A_33_P3629131 | 1.32E-02 | -2.16 | CMT1A duplicated region transcript 3          | DKFZp686P15240_r1 686 (synonym: hlcc3) Homo sapiens cDNA clone DKFZp686P15240 5', mRNA sequence [BX484257] |
| SDC1    | A_23_P16944   | 1.32E-02 | 3.66  | syndecan 1                                    | Homo sapiens syndecan 1 (SDC1), transcript variant 1, mRNA [NM_001006946]                                  |
| KNG1    | A_23_P212258  | 1.32E-02 | -3.40 | kininogen 1                                   | Homo sapiens kininogen 1 (KNG1), transcript variant 2, mRNA [NM_000893]                                    |
| C8orf71 | A_33_P3238182 | 1.32E-02 | -2.65 | chromosome 8 open reading frame 71            | Homo sapiens chromosome 8 open reading frame 71 (C8orf71), non-coding RNA [NR_026772]                      |
| TLR5    | A_23_P85903   | 1.33E-02 | 2.99  | toll-like receptor 5                          | Homo sapiens toll-like receptor 5 (TLR5), mRNA [NM_003268]                                                 |
| UNC93B1 | A_33_P3404470 | 1.33E-02 | 2.32  | unc-93 homolog B1 (C. elegans)                | Homo sapiens unc-93 homolog B1 (C. elegans) (UNC93B1), mRNA [NM_030930]                                    |
| PLXDC2  | A_23_P161424  | 1.33E-02 | 2.17  | plexin domain containing 2                    | Homo sapiens plexin domain containing 2 (PLXDC2), mRNA [NM_032812]                                         |
| PTN     | A_24_P870620  | 1.33E-02 | 2.69  | pleiotrophin                                  | Homo sapiens pleiotrophin (PTN), mRNA [NM_002825]                                                          |
| PTPRO   | A_23_P204304  | 1.34E-02 | 3.76  | protein tyrosine phosphatase,                 | Homo sapiens protein tyrosine                                                                              |

|              |                |          |       |                                                                      |                                                                                                                                                                           |
|--------------|----------------|----------|-------|----------------------------------------------------------------------|---------------------------------------------------------------------------------------------------------------------------------------------------------------------------|
| COMTD1       | A_33_P3257222  | 1.34E-02 | -2.04 | receptor type, O<br>catechol-O-methyltransferase domain containing 1 | phosphatase, receptor type, O (PTPRO), transcript variant 1, mRNA [NM_030667]<br>Homo sapiens catechol-O-methyltransferase domain containing 1 (COMTD1), mRNA [NM_144589] |
| LOC100507006 | A_19_P00317704 | 1.34E-02 | 3.91  |                                                                      | PREDICTED: Homo sapiens hypothetical LOC100507006 (LOC100507006), miscRNA [XR_109941]                                                                                     |
| ZNF846       | A_33_P3306823  | 1.35E-02 | 3.60  | zinc finger protein 846                                              | Homo sapiens zinc finger protein 846 (ZNF846), mRNA [NM_001077624]                                                                                                        |
| CGNL1        | A_23_P163306   | 1.35E-02 | 2.85  | cingulin-like 1                                                      | Homo sapiens cingulin-like 1 (CGNL1), transcript variant 2, mRNA [NM_032866]                                                                                              |
| LTB          | A_33_P3248265  | 1.35E-02 | 8.56  | lymphotoxin beta (TNF superfamily, member 3)                         | Homo sapiens lymphotoxin beta (TNF superfamily, member 3) (LTB), transcript variant 1, mRNA [NM_002341]                                                                   |
| CCL3         | A_33_P3316273  | 1.36E-02 | 6.04  | chemokine (C-C motif) ligand 3                                       | Homo sapiens chemokine (C-C motif) ligand 3 (CCL3), mRNA [NM_002983]                                                                                                      |
| TMEM236      | A_33_P3382031  | 1.36E-02 | 4.00  | transmembrane protein 236                                            | Homo sapiens transmembrane protein 236 (TMEM236), mRNA [NM_001098844]                                                                                                     |
| RNF213       | A_19_P00317052 | 1.36E-02 | 3.05  |                                                                      | Homo sapiens ring finger protein 213 (RNF213), transcript variant 1, mRNA [NM_020914]                                                                                     |
| LOC100652917 | A_24_P694820   | 1.36E-02 | 2.26  | uncharacterized LOC100652917                                         | PREDICTED: Homo sapiens hypothetical LOC100652917 (LOC100652917), miscRNA [XR_132741]                                                                                     |
| IL12RB2      | A_23_P72077    | 1.37E-02 | 3.67  | interleukin 12 receptor, beta 2                                      | Homo sapiens interleukin 12 receptor, beta 2 (IL12RB2), mRNA [NM_001559]                                                                                                  |
| C1orf96      | A_33_P3361202  | 1.37E-02 | 2.46  | chromosome 1 open reading frame 96                                   | Homo sapiens chromosome 1 open reading frame 96 (C1orf96), mRNA [NM_145257]                                                                                               |
| TMEM63B      | A_23_P167856   | 1.38E-02 | -2.87 | transmembrane protein 63B                                            | Homo sapiens transmembrane protein 63B (TMEM63B), mRNA [NM_018426]                                                                                                        |

|           |                |          |       |                                                                                 |                                                                                                                                                                                            |
|-----------|----------------|----------|-------|---------------------------------------------------------------------------------|--------------------------------------------------------------------------------------------------------------------------------------------------------------------------------------------|
| LOC554207 | A_24_P109887   | 1.38E-02 | -2.57 | uncharacterized LOC554207                                                       | Homo sapiens hypothetical LOC554207, mRNA (cDNA clone MGC:21504 IMAGE:3882600), complete cds. [BC031469]                                                                                   |
| ATP5G1    | A_23_P164228   | 1.38E-02 | -2.26 | ATP synthase, H+ transporting, mitochondrial Fo complex, subunit C1 (subunit 9) | Homo sapiens ATP synthase, H+ transporting, mitochondrial Fo complex, subunit C1 (subunit 9) (ATP5G1), nuclear gene encoding mitochondrial protein, transcript variant 1, mRNA [NM_005175] |
| TACC3     | A_23_P212844   | 1.38E-02 | 2.78  | transforming, acidic coiled-coil containing protein 3                           | Homo sapiens transforming, acidic coiled-coil containing protein 3 (TACC3), mRNA [NM_006342]                                                                                               |
| ZBTB37    | A_23_P137504   | 1.38E-02 | 2.42  | zinc finger and BTB domain containing 37                                        | Homo sapiens zinc finger and BTB domain containing 37 (ZBTB37), transcript variant 2, mRNA [NM_032522]                                                                                     |
| TRIP13    | A_33_P3407256  | 1.38E-02 | -2.29 | thyroid hormone receptor interactor 13                                          | Homo sapiens thyroid hormone receptor interactor 13 (TRIP13), transcript variant 2, mRNA [NM_001166260]                                                                                    |
| FOXP2     | A_24_P921683   | 1.38E-02 | 3.36  | forkhead box P2                                                                 | Homo sapiens forkhead box P2 (FOXP2), transcript variant 1, mRNA [NM_014491]                                                                                                               |
| FAM83F    | A_23_P343963   | 1.38E-02 | -2.83 | family with sequence similarity 83, member F                                    | Homo sapiens family with sequence similarity 83, member F (FAM83F), mRNA [NM_138435]                                                                                                       |
| ANK2      | A_23_P133068   | 1.38E-02 | -3.86 | ankyrin 2, neuronal                                                             | Homo sapiens ankyrin 2, neuronal (ANK2), transcript variant 1, mRNA [NM_001148]                                                                                                            |
| SNHG5     | A_19_P00316541 | 1.38E-02 | -2.37 | small nucleolar RNA host gene 5 (non-protein coding)                            | Homo sapiens small nucleolar RNA host gene 5 (non-protein coding) (SNHG5), non-coding RNA [NR_003038]                                                                                      |
| C5orf25   | A_33_P3282384  | 1.38E-02 | 2.16  | chromosome 5 open reading frame 25                                              | chromosome 5 open reading frame 25 [Source:HGNC Symbol;Acc:24779] [ENST00000377277]                                                                                                        |
| RAB8B     | A_23_P317465   | 1.39E-02 | 2.13  | RAB8B, member RAS oncogene                                                      | Homo sapiens RAB8B, member RAS                                                                                                                                                             |

|          |               |          |       |                                                                        |                                                                                                                                                  |
|----------|---------------|----------|-------|------------------------------------------------------------------------|--------------------------------------------------------------------------------------------------------------------------------------------------|
| KCNJ5    | A_24_P309521  | 1.40E-02 | -2.87 | family<br>potassium inwardly-rectifying channel, subfamily J, member 5 | oncogene family (RAB8B), mRNA [NM_016530]<br>Homo sapiens potassium inwardly-rectifying channel, subfamily J, member 5 (KCNJ5), mRNA [NM_000890] |
| TLR3     | A_23_P29922   | 1.40E-02 | 2.12  | toll-like receptor 3                                                   | Homo sapiens toll-like receptor 3 (TLR3), mRNA [NM_003265]                                                                                       |
| FAM72A   | A_33_P3242952 | 1.40E-02 | 5.54  | family with sequence similarity 72, member A                           | Homo sapiens family with sequence similarity 72, member A (FAM72A), mRNA [NM_001123168]                                                          |
| PILRA    | A_23_P31224   | 1.40E-02 | 2.09  | paired immunoglobulin-like type 2 receptor alpha                       | Homo sapiens paired immunoglobulin-like type 2 receptor alpha (PILRA), transcript variant 3, mRNA [NM_178273]                                    |
| DDX60    | A_23_P41470   | 1.40E-02 | 2.32  | DEAD (Asp-Glu-Ala-Asp) box polypeptide 60                              | Homo sapiens DEAD (Asp-Glu-Ala-Asp) box polypeptide 60 (DDX60), mRNA [NM_017631]                                                                 |
| DOK2     | A_23_P134851  | 1.41E-02 | 5.42  | docking protein 2, 56kDa                                               | Homo sapiens docking protein 2, 56kDa (DOK2), mRNA [NM_003974]                                                                                   |
| PTGER3   | A_33_P3265749 | 1.41E-02 | -3.44 | prostaglandin E receptor 3 (subtype EP3)                               | Homo sapiens prostaglandin E receptor 3 (subtype EP3) (PTGER3), transcript variant 7, mRNA [NM_198717]                                           |
| TNFRSF18 | A_24_P411121  | 1.41E-02 | 3.48  | tumor necrosis factor receptor superfamily, member 18                  | Homo sapiens tumor necrosis factor receptor superfamily, member 18 (TNFRSF18), transcript variant 2, mRNA [NM_148901]                            |
| RPH3A    | A_33_P3395384 | 1.41E-02 | -3.04 | rabphilin 3A homolog (mouse)                                           | Homo sapiens rabphilin 3A homolog (mouse) (RPH3A), transcript variant 1, mRNA [NM_001143854]                                                     |
| MYOG     | A_23_P160438  | 1.41E-02 | -3.82 | myogenin (myogenic factor 4)                                           | Homo sapiens myogenin (myogenic factor 4) (MYOG), mRNA [NM_002479]                                                                               |
| DRD4     | A_33_P3373765 | 1.42E-02 | 2.33  | dopamine receptor D4                                                   | Homo sapiens dopamine receptor D4 (DRD4), mRNA [NM_000797]                                                                                       |
| SNORA76  | A_33_P3876591 | 1.42E-02 | -2.50 | small nucleolar RNA, H/ACA box                                         | AGENCOURT_13972169 NIH_MGC_173                                                                                                                   |

|          |               |          |       |                                                           |                                                                                                       |
|----------|---------------|----------|-------|-----------------------------------------------------------|-------------------------------------------------------------------------------------------------------|
|          |               |          |       | 76                                                        | Homo sapiens cDNA 5', mRNA sequence [CD050382]                                                        |
| KIAA0408 | A_23_P215048  | 1.42E-02 | 2.74  | KIAA0408                                                  | Homo sapiens KIAA0408 (KIAA0408), mRNA [NM_014702]                                                    |
| PPP4R1L  | A_24_P65851   | 1.42E-02 | 2.01  | protein phosphatase 4, regulatory subunit 1-like          | Homo sapiens protein phosphatase 4, regulatory subunit 1-like (PPP4R1L), non-coding RNA [NR_003505]   |
| HSPA6    | A_23_P114903  | 1.43E-02 | 4.03  | heat shock 70kDa protein 6 (HSP70B')                      | Homo sapiens heat shock 70kDa protein 6 (HSP70B') (HSPA6), mRNA [NM_002155]                           |
| DCHS2    | A_23_P144490  | 1.43E-02 | -3.37 | dachsous 2 (Drosophila)                                   | Homo sapiens dachsous 2 (Drosophila) (DCHS2), transcript variant 1, mRNA [NM_017639]                  |
| HSBP1L1  | A_32_P46981   | 1.43E-02 | -2.04 | heat shock factor binding protein 1-like 1                | Homo sapiens heat shock factor binding protein 1-like 1 (HSBP1L1), mRNA [NM_001136180]                |
| NLRP3    | A_23_P9883    | 1.43E-02 | 4.02  | NLR family, pyrin domain containing 3                     | Homo sapiens NLR family, pyrin domain containing 3 (NLRP3), transcript variant 3, mRNA [NM_001079821] |
| CCDC69   | A_24_P97825   | 1.43E-02 | -2.40 | coiled-coil domain containing 69                          | Homo sapiens coiled-coil domain containing 69 (CCDC69), mRNA [NM_015621]                              |
| C1orf127 | A_32_P468341  | 1.44E-02 | -2.61 | chromosome 1 open reading frame 127                       | Homo sapiens chromosome 1 open reading frame 127 (C1orf127), mRNA [NM_001170754]                      |
| C6orf26  | A_24_P3804    | 1.46E-02 | 2.62  | chromosome 6 open reading frame 26                        | Homo sapiens chromosome 6 open reading frame 26 (C6orf26), mRNA [NM_001039651]                        |
| TMED8    | A_33_P3346157 | 1.47E-02 | 2.30  | transmembrane emp24 protein transport domain containing 8 | Homo sapiens transmembrane emp24 protein transport domain containing 8 (TMED8), mRNA [NM_213601]      |
| C1orf38  | A_24_P85775   | 1.48E-02 | 4.01  | chromosome 1 open reading frame 38                        | Homo sapiens chromosome 1 open reading frame 38 (C1orf38), transcript                                 |

|               |               |          |       |                                                                                    |                                                                                                                                                     |
|---------------|---------------|----------|-------|------------------------------------------------------------------------------------|-----------------------------------------------------------------------------------------------------------------------------------------------------|
| VCY           | A_33_P3291510 | 1.48E-02 | -2.58 | variable charge, Y-linked                                                          | variant 2, mRNA [NM_001039477]<br>Homo sapiens variable charge, Y-linked (VCY), mRNA [NM_004679]                                                    |
| SLC7A7        | A_23_P99642   | 1.48E-02 | 3.83  | solute carrier family 7 (amino acid transporter light chain, y+L system), member 7 | Homo sapiens solute carrier family 7 (amino acid transporter light chain, y+L system), member 7 (SLC7A7), transcript variant 3, mRNA [NM_001126106] |
| DKFZp779M0652 | A_32_P189790  | 1.49E-02 | -2.86 | uncharacterized<br>DKFZp779M0652                                                   | Homo sapiens uncharacterized DKFZp779M0652 (DKFZp779M0652), non-coding RNA [NR_027134]                                                              |
| VNN2          | A_23_P122724  | 1.49E-02 | 2.58  | vanin 2                                                                            | Homo sapiens vanin 2 (VNN2), transcript variant 1, mRNA [NM_004665]                                                                                 |
| MTFP1         | A_23_P29204   | 1.49E-02 | -2.46 | mitochondrial fission process 1                                                    | Homo sapiens mitochondrial fission process 1 (MTFP1), nuclear gene encoding mitochondrial protein, transcript variant 1, mRNA [NM_016498]           |
| LAIR1         | A_33_P3253394 | 1.50E-02 | 3.87  | leukocyte-associated immunoglobulin-like receptor 1                                | Homo sapiens leukocyte-associated immunoglobulin-like receptor 1 (LAIR1), transcript variant a, mRNA [NM_002287]                                    |
| ART4          | A_23_P116902  | 1.50E-02 | 3.53  | ADP-ribosyltransferase 4 (Dombrock blood group)                                    | Homo sapiens ADP-ribosyltransferase 4 (Dombrock blood group) (ART4), mRNA [NM_021071]                                                               |
| DNAJB5        | A_23_P112241  | 1.50E-02 | -2.40 | DnaJ (Hsp40) homolog, subfamily B, member 5                                        | Homo sapiens DnaJ (Hsp40) homolog, subfamily B, member 5 (DNAJB5), transcript variant 3, mRNA [NM_012266]                                           |
| CEL           | A_33_P3219303 | 1.50E-02 | -2.25 | carboxyl ester lipase (bile salt-stimulated lipase)                                | Homo sapiens carboxyl ester lipase (bile salt-stimulated lipase) (CEL), mRNA [NM_001807]                                                            |
| LOC645261     | A_33_P3499692 | 1.50E-02 | -2.60 | PP565                                                                              | Homo sapiens PP565 mRNA, complete cds. [AF258587]                                                                                                   |
| LOC651337     | A_33_P3350892 | 1.50E-02 | -2.38 | uncharacterized LOC651337                                                          | PREDICTED: Homo sapiens hypothetical LOC651337 (LOC651337), miscRNA [XR_132727]                                                                     |

|              |               |          |       |                                                 |                                                                                                                                         |
|--------------|---------------|----------|-------|-------------------------------------------------|-----------------------------------------------------------------------------------------------------------------------------------------|
| PDE4DIP      | A_23_P200801  | 1.50E-02 | -2.07 | phosphodiesterase 4D interacting protein        | Homo sapiens phosphodiesterase 4D interacting protein (PDE4DIP), transcript variant 5, mRNA [NM_001002811]                              |
| PTPRH        | A_23_P101642  | 1.50E-02 | -3.25 | protein tyrosine phosphatase, receptor type, H  | Homo sapiens protein tyrosine phosphatase, receptor type, H (PTPRH), transcript variant 1, mRNA [NM_002842]                             |
| KIAA1456     | A_32_P159234  | 1.50E-02 | -2.86 | KIAA1456                                        | Homo sapiens KIAA1456 (KIAA1456), transcript variant 1, mRNA [NM_020844]                                                                |
| C4orf46      | A_33_P3377691 | 1.50E-02 | 2.19  | chromosome 4 open reading frame 46              | Homo sapiens chromosome 4 open reading frame 46 (C4orf46), mRNA [NM_001008393]                                                          |
| CDH16        | A_23_P100240  | 1.51E-02 | -6.46 | cadherin 16, KSP-cadherin                       | Homo sapiens cadherin 16, KSP-cadherin (CDH16), transcript variant 1, mRNA [NM_004062]                                                  |
| LOC100506123 | A_33_P3884179 | 1.51E-02 | 4.84  | uncharacterized LOC100506123                    | Homo sapiens uncharacterized LOC100506123 (LOC100506123), non-coding RNA [NR_040097]                                                    |
| C1QC         | A_23_P125977  | 1.51E-02 | 3.33  | complement component 1, q subcomponent, C chain | Homo sapiens complement component 1, q subcomponent, C chain (C1QC), transcript variant 2, mRNA [NM_172369]                             |
| TMEM198      | A_24_P822704  | 1.51E-02 | -2.13 | transmembrane protein 198                       | Homo sapiens transmembrane protein 198 (TMEM198), mRNA [NM_001005209]                                                                   |
| LOC100127983 | A_24_P683011  | 1.53E-02 | -2.13 | uncharacterized LOC100127983                    | Homo sapiens uncharacterized protein LOC100127983 (LOC100127983), mRNA [NM_001190972]                                                   |
| PLAC8        | A_24_P183128  | 1.53E-02 | 4.91  | placenta-specific 8                             | Homo sapiens placenta-specific 8 (PLAC8), transcript variant 2, mRNA [NM_016619]                                                        |
| PKLR         | A_23_P201022  | 1.53E-02 | -2.63 | pyruvate kinase, liver and RBC                  | Homo sapiens pyruvate kinase, liver and RBC (PKLR), nuclear gene encoding mitochondrial protein, transcript variant 1, mRNA [NM_000298] |

|           |               |          |       |                                                                        |                                                                                                                                        |
|-----------|---------------|----------|-------|------------------------------------------------------------------------|----------------------------------------------------------------------------------------------------------------------------------------|
| MSI2      | A_23_P44195   | 1.53E-02 | -2.26 | musashi homolog 2 (Drosophila)                                         | Homo sapiens musashi homolog 2 (Drosophila) (MSI2), transcript variant 1, mRNA [NM_138962]                                             |
| PITPNM2   | A_23_P401361  | 1.53E-02 | -2.34 | phosphatidylinositol transfer protein, membrane-associated 2           | Homo sapiens phosphatidylinositol transfer protein, membrane-associated 2 (PITPNM2), mRNA [NM_020845]                                  |
| GRAMD4    | A_24_P23258   | 1.53E-02 | -2.24 | GRAM domain containing 4                                               | Homo sapiens GRAM domain containing 4 (GRAMD4), mRNA [NM_015124]                                                                       |
| C10orf105 | A_33_P3322999 | 1.53E-02 | 4.24  | chromosome 10 open reading frame 105                                   | Homo sapiens chromosome 10 open reading frame 105 (C10orf105), transcript variant 1, mRNA [NM_001164375]                               |
| CNN1      | A_23_P125233  | 1.54E-02 | -4.71 | calponin 1, basic, smooth muscle                                       | Homo sapiens calponin 1, basic, smooth muscle (CNN1), mRNA [NM_001299]                                                                 |
| C6orf204  | A_33_P3407339 | 1.54E-02 | -2.66 | chromosome 6 open reading frame 204                                    | Homo sapiens chromosome 6 open reading frame 204 (C6orf204), transcript variant 2, mRNA [NM_206921]                                    |
| MOSPD1    | A_33_P3330353 | 1.54E-02 | -2.34 | motile sperm domain containing 1                                       | Homo sapiens motile sperm domain containing 1 (MOSPD1), mRNA [NM_019556]                                                               |
| FOXI3     | A_24_P15391   | 1.54E-02 | -2.45 | forkhead box I3                                                        | Homo sapiens forkhead box I3 (FOXI3), mRNA [NM_001135649]                                                                              |
| AQP10     | A_23_P126613  | 1.55E-02 | 3.50  | aquaporin 10                                                           | Homo sapiens aquaporin 10 (AQP10), mRNA [NM_080429]                                                                                    |
| XRCC3     | A_33_P3301524 | 1.55E-02 | 2.02  | X-ray repair complementing defective repair in Chinese hamster cells 3 | Homo sapiens X-ray repair complementing defective repair in Chinese hamster cells 3 (XRCC3), transcript variant 1, mRNA [NM_001100119] |
| NPC1L1    | A_24_P324712  | 1.55E-02 | -2.61 | NPC1 (Niemann-Pick disease, type C1, gene)-like 1                      | Homo sapiens NPC1 (Niemann-Pick disease, type C1, gene)-like 1 (NPC1L1), transcript variant 1, mRNA [NM_013389]                        |
| HOPX      | A_23_P254507  | 1.55E-02 | -5.49 | HOP homeobox                                                           | Homo sapiens HOP homeobox (HOPX),                                                                                                      |

|           |               |          |       |                                                                    |                                                                                                                       |
|-----------|---------------|----------|-------|--------------------------------------------------------------------|-----------------------------------------------------------------------------------------------------------------------|
| KLHDC8B   | A_24_P148836  | 1.55E-02 | -2.11 | kelch domain containing 8B                                         | transcript variant 2, mRNA [NM_139211]<br>Homo sapiens kelch domain containing 8B (KLHDC8B), mRNA [NM_173546]         |
| ABLIM2    | A_33_P3381666 | 1.55E-02 | -2.25 | actin binding LIM protein family, member 2                         | Homo sapiens actin binding LIM protein family, member 2 (ABLIM2), transcript variant 7, mRNA [NM_001130088]           |
| PAQR5     | A_33_P3368750 | 1.55E-02 | -4.01 | progesterone and adiponectin receptor family member V              | Homo sapiens progesterone and adiponectin receptor family member V (PAQR5), transcript variant 1, mRNA [NM_001104554] |
| WAS       | A_23_P96331   | 1.55E-02 | 2.03  | Wiskott-Aldrich syndrome (eczema-thrombocytopenia)                 | Homo sapiens Wiskott-Aldrich syndrome (eczema-thrombocytopenia) (WAS), mRNA [NM_000377]                               |
| LOC157381 | A_33_P3793702 | 1.55E-02 | -2.27 | uncharacterized LOC157381                                          | Homo sapiens uncharacterized LOC157381 (LOC157381), non-coding RNA [NR_027321]                                        |
| METTL21A  | A_23_P209337  | 1.55E-02 | -2.05 | methyltransferase like 21A                                         | Homo sapiens methyltransferase like 21A (METTL21A), transcript variant 1, mRNA [NM_145280]                            |
| TMEM171   | A_32_P110390  | 1.56E-02 | -2.64 | transmembrane protein 171                                          | Homo sapiens transmembrane protein 171 (TMEM171), transcript variant 1, mRNA [NM_173490]                              |
| C5orf39   | A_33_P3299279 | 1.56E-02 | 2.21  | chromosome 5 open reading frame 39                                 | Homo sapiens chromosome 5 open reading frame 39 (C5orf39), mRNA [NM_001014279]                                        |
| FCN3      | A_33_P3275741 | 1.56E-02 | -2.17 | ficolin (collagen/fibrinogen domain containing) 3 (Hakata antigen) | ficolin (collagen/fibrinogen domain containing) 3 (Hakata antigen) [Source:HGNC Symbol;Acc:3625] [ENST00000498393]    |
| HLA-E     | A_32_P460973  | 1.56E-02 | 2.12  | major histocompatibility complex, class I, E                       | Homo sapiens major histocompatibility complex, class I, E (HLA-E), mRNA [NM_005516]                                   |
| CGA       | A_23_P42386   | 1.56E-02 | -8.65 | glycoprotein hormones, alpha                                       | Homo sapiens glycoprotein hormones,                                                                                   |

|              |                |          |       |                                                                    |                                                                                                                                                                        |
|--------------|----------------|----------|-------|--------------------------------------------------------------------|------------------------------------------------------------------------------------------------------------------------------------------------------------------------|
| PDE4D        | A_33_P3389653  | 1.57E-02 | -2.94 | polypeptide<br>phosphodiesterase 4D, cAMP-specific                 | alpha polypeptide (CGA), transcript variant 2, mRNA [NM_000735]<br>Homo sapiens phosphodiesterase 4D, cAMP-specific (PDE4D), transcript variant 3, mRNA [NM_001165899] |
| MXRA5        | A_23_P258136   | 1.57E-02 | 8.60  | matrix-remodelling associated 5                                    | Homo sapiens matrix-remodelling associated 5 (MXRA5), mRNA [NM_015419]                                                                                                 |
| FMNL1        | A_24_P390668   | 1.57E-02 | 3.34  | formin-like 1                                                      | Homo sapiens formin-like 1 (FMNL1), mRNA [NM_005892]                                                                                                                   |
| HOGA1        | A_33_P3249076  | 1.57E-02 | 2.39  | 4-hydroxy-2-oxoglutarate aldolase 1                                | 4-hydroxy-2-oxoglutarate aldolase 1 [Source:HGNC Symbol;Acc:25155] [ENST00000465608]                                                                                   |
| LARGE        | A_23_P91697    | 1.57E-02 | -2.00 | like-glycosyltransferase                                           | Homo sapiens like-glycosyltransferase (LARGE), transcript variant 1, mRNA [NM_004737]                                                                                  |
| LOC100508196 | A_19_P00322332 | 1.57E-02 | 3.36  | uncharacterized LOC100508196                                       | PREDICTED: Homo sapiens hypothetical LOC100508196 (LOC100508196), miscRNA [XR_111691]                                                                                  |
| SOX10        | A_23_P143694   | 1.58E-02 | -2.98 | SRY (sex determining region Y)-box 10                              | Homo sapiens SRY (sex determining region Y)-box 10 (SOX10), mRNA [NM_006941]                                                                                           |
| CFH          | A_33_P3318288  | 1.58E-02 | 3.25  | complement factor H                                                | Homo sapiens complement factor H (CFH), nuclear gene encoding mitochondrial protein, transcript variant 2, mRNA [NM_001014975]                                         |
| ABCC5        | A_33_P3298057  | 1.58E-02 | -2.19 | ATP-binding cassette, sub-family C (CFTR/MRP), member 5            | Homo sapiens ATP-binding cassette, sub-family C (CFTR/MRP), member 5 (ABCC5), transcript variant 2, mRNA [NM_001023587]                                                |
| ITGB2        | A_23_P329573   | 1.59E-02 | 6.30  | integrin, beta 2 (complement component 3 receptor 3 and 4 subunit) | Homo sapiens integrin, beta 2 (complement component 3 receptor 3 and 4 subunit) (ITGB2), transcript variant                                                            |

|              |                |          |       |                                                                           |                                                                                                                                         |
|--------------|----------------|----------|-------|---------------------------------------------------------------------------|-----------------------------------------------------------------------------------------------------------------------------------------|
| KCNA4        | A_24_P150023   | 1.59E-02 | 3.75  | potassium voltage-gated channel, shaker-related subfamily, member 4       | 1, mRNA [NM_000211]<br>Homo sapiens potassium voltage-gated channel, shaker-related subfamily, member 4 (KCNA4), mRNA [NM_002233]       |
| TMEM156      | A_23_P92334    | 1.59E-02 | 3.49  | transmembrane protein 156                                                 | Homo sapiens transmembrane protein 156 (TMEM156), mRNA [NM_024943]                                                                      |
| SGMS2        | A_23_P326204   | 1.59E-02 | -2.30 | sphingomyelin synthase 2                                                  | Homo sapiens sphingomyelin synthase 2 (SGMS2), transcript variant 1, mRNA [NM_152621]                                                   |
| ANKK1        | A_33_P3336053  | 1.62E-02 | 3.03  | ankyrin repeat and kinase domain containing 1                             | Homo sapiens ankyrin repeat and kinase domain containing 1 (ANKK1), mRNA [NM_178510]                                                    |
| SH2D2A       | A_23_P160618   | 1.62E-02 | 2.42  | SH2 domain containing 2A                                                  | Homo sapiens SH2 domain containing 2A (SH2D2A), transcript variant 2, mRNA [NM_003975]                                                  |
| NFATC2       | A_23_P91278    | 1.62E-02 | 3.04  | nuclear factor of activated T-cells, cytoplasmic, calcineurin-dependent 2 | Homo sapiens nuclear factor of activated T-cells, cytoplasmic, calcineurin-dependent 2 (NFATC2), transcript variant 2, mRNA [NM_173091] |
| LOX          | A_23_P122216   | 1.62E-02 | 2.78  | lysyl oxidase                                                             | Homo sapiens lysyl oxidase (LOX), transcript variant 1, mRNA [NM_002317]                                                                |
| LOC100507429 | A_19_P00803039 | 1.63E-02 | 3.33  | uncharacterized LOC100507429                                              | PREDICTED: Homo sapiens hypothetical LOC100507429 (LOC100507429), miscRNA [XR_110179]                                                   |
| MRC1         | A_23_P12746    | 1.63E-02 | 4.01  | mannose receptor, C type 1                                                | Homo sapiens mannose receptor, C type 1 (MRC1), mRNA [NM_002438]                                                                        |
| CD1B         | A_23_P351844   | 1.63E-02 | 4.51  | CD1b molecule                                                             | Homo sapiens CD1b molecule (CD1B), mRNA [NM_001764]                                                                                     |
| F2R          | A_23_P213562   | 1.64E-02 | 3.00  | coagulation factor II (thrombin) receptor                                 | Homo sapiens coagulation factor II (thrombin) receptor (F2R), mRNA [NM_001992]                                                          |
| FCAR         | A_24_P348265   | 1.64E-02 | 2.96  | Fc fragment of IgA, receptor for                                          | Homo sapiens Fc fragment of IgA,                                                                                                        |

|         |               |          |       |                                                        |                                                                                                                                                             |
|---------|---------------|----------|-------|--------------------------------------------------------|-------------------------------------------------------------------------------------------------------------------------------------------------------------|
| AP1S3   | A_33_P3289005 | 1.64E-02 | 2.22  | adaptor-related protein complex 1, sigma 3 subunit     | receptor for (FCAR), transcript variant 3, mRNA [NM_133271]<br>Homo sapiens adaptor-related protein complex 1, sigma 3 subunit (AP1S3), mRNA [NM_001039569] |
| KLRF1   | A_33_P3274501 | 1.64E-02 | 2.10  | killer cell lectin-like receptor subfamily F, member 1 | Homo sapiens killer cell lectin-like receptor subfamily F, member 1 (KLRF1), mRNA [NM_016523]                                                               |
| SIGLEC1 | A_23_P17481   | 1.65E-02 | 3.96  | sialic acid binding Ig-like lectin 1, sialoadhesin     | Homo sapiens sialic acid binding Ig-like lectin 1, sialoadhesin (SIGLEC1), mRNA [NM_023068]                                                                 |
| HLA-DOB | A_23_P30736   | 1.65E-02 | 2.77  | major histocompatibility complex, class II, DO beta    | Homo sapiens major histocompatibility complex, class II, DO beta (HLA-DOB), mRNA [NM_002120]                                                                |
| SRGAP2  | A_32_P50123   | 1.67E-02 | 2.05  | SLIT-ROBO Rho GTPase activating protein 2              | Homo sapiens SLIT-ROBO Rho GTPase activating protein 2 (SRGAP2), transcript variant 2, mRNA [NM_001042758]                                                  |
| PRDX6   | A_23_P983     | 1.68E-02 | -2.01 | peroxiredoxin 6                                        | Homo sapiens peroxiredoxin 6 (PRDX6), mRNA [NM_004905]                                                                                                      |
| SFRP4   | A_33_P3335177 | 1.69E-02 | 8.34  | secreted frizzled-related protein 4                    | Homo sapiens secreted frizzled-related protein 4 (SFRP4), mRNA [NM_003014]                                                                                  |
| CLECL1  | A_23_P321984  | 1.69E-02 | 3.45  | C-type lectin-like 1                                   | Homo sapiens C-type lectin-like 1 (CLECL1), mRNA [NM_172004]                                                                                                |
| INPP5D  | A_23_P61149   | 1.69E-02 | 2.95  | inositol polyphosphate-5-phosphatase, 145kDa           | Homo sapiens inositol polyphosphate-5-phosphatase, 145kDa (INPP5D), transcript variant 1, mRNA [NM_001017915]                                               |
| TCOF1   | A_24_P243396  | 1.70E-02 | -2.29 | Treacher Collins-Franceschetti syndrome 1              | Homo sapiens Treacher Collins-Franceschetti syndrome 1 (TCOF1), transcript variant 3, mRNA [NM_001008657]                                                   |
| OTUD6A  | A_24_P42389   | 1.70E-02 | -3.20 | OTU domain containing 6A                               | Homo sapiens OTU domain containing 6A (OTUD6A), mRNA [NM_207320]                                                                                            |

|          |               |          |       |                                                                |                                                                                                                                      |
|----------|---------------|----------|-------|----------------------------------------------------------------|--------------------------------------------------------------------------------------------------------------------------------------|
| TCF7     | A_33_P3250671 | 1.70E-02 | 2.99  | transcription factor 7 (T-cell specific, HMG-box)              | Homo sapiens transcription factor 7 (T-cell specific, HMG-box) (TCF7), transcript variant 1, mRNA [NM_003202]                        |
| DDX11L2  | A_32_P227317  | 1.70E-02 | -3.15 | DEAD/H (Asp-Glu-Ala-Asp/His) box polypeptide 11 like 2         | Homo sapiens DEAD/H (Asp-Glu-Ala-Asp/His) box polypeptide 11 like 2 (DDX11L2), transcript variant 2, non-coding RNA [NR_024005]      |
| ASPHD2   | A_24_P245815  | 1.70E-02 | 2.91  | aspartate beta-hydroxylase domain containing 2                 | Homo sapiens aspartate beta-hydroxylase domain containing 2 (ASPHD2), mRNA [NM_020437]                                               |
| HLA-F    | A_33_P3379967 | 1.70E-02 | 2.66  | major histocompatibility complex, class I, F                   | Homo sapiens major histocompatibility complex, class I, F (HLA-F), transcript variant 3, mRNA [NM_001098478]                         |
| IDH2     | A_23_P129209  | 1.70E-02 | -2.02 | isocitrate dehydrogenase 2 (NADP+), mitochondrial              | Homo sapiens isocitrate dehydrogenase 2 (NADP+), mitochondrial (IDH2), nuclear gene encoding mitochondrial protein, mRNA [NM_002168] |
| CXCL10   | A_33_P3343175 | 1.71E-02 | 12.85 | chemokine (C-X-C motif) ligand 10                              | Homo sapiens chemokine (C-X-C motif) ligand 10 (CXCL10), mRNA [NM_001565]                                                            |
| WFDC2    | A_23_P218675  | 1.71E-02 | -3.28 | WAP four-disulfide core domain 2                               | Homo sapiens WAP four-disulfide core domain 2 (WFDC2), mRNA [NM_006103]                                                              |
| TRMT5    | A_33_P3238976 | 1.72E-02 | 2.27  | TRM5 tRNA methyltransferase 5 homolog ( <i>S. cerevisiae</i> ) | Homo sapiens TRM5 tRNA methyltransferase 5 homolog ( <i>S. cerevisiae</i> ) (TRMT5), mRNA [NM_020810]                                |
| GABRR3   | A_23_P69020   | 1.74E-02 | -2.26 | gamma-aminobutyric acid (GABA) receptor, rho 3                 | Homo sapiens gamma-aminobutyric acid (GABA) receptor, rho 3 (GABRR3), mRNA [NM_001105580]                                            |
| FLJ42351 | A_33_P3387971 | 1.74E-02 | 3.38  | uncharacterized LOC400999                                      | Homo sapiens cDNA FLJ42351 fis, clone UTERU2005664. [AK124342]                                                                       |
| RMRP     | A_33_P3401284 | 1.75E-02 | 2.06  | RNA component of mitochondrial RNA processing endoribonuclease | Homo sapiens RNA component of mitochondrial RNA processing endoribonuclease (RMRP), RNase MRP                                        |

|              |                |          |       |                                                                                                  |                                                                                                                                        |
|--------------|----------------|----------|-------|--------------------------------------------------------------------------------------------------|----------------------------------------------------------------------------------------------------------------------------------------|
| PLCB2        | A_33_P3260614  | 1.75E-02 | 3.45  | phospholipase C, beta 2                                                                          | RNA [NR_003051]<br>Homo sapiens phospholipase C, beta 2 (PLCB2), mRNA [NM_004573]                                                      |
| PPM1M        | A_23_P258393   | 1.75E-02 | 2.12  | protein phosphatase, Mg2+/Mn2+ dependent, 1M                                                     | Homo sapiens protein phosphatase, Mg2+/Mn2+ dependent, 1M (PPM1M), transcript variant 1, mRNA [NM_144641]                              |
| LOC100653245 | A_24_P627503   | 1.75E-02 | 4.21  | ig heavy chain V-III region VH26-like                                                            | immunoglobulin heavy variable 3-30 [Source:HGNC Symbol;Acc:5591] [ENST00000390613]                                                     |
| LOC282997    | A_33_P3645465  | 1.76E-02 | 3.06  | uncharacterized LOC282997                                                                        | Homo sapiens uncharacterized LOC282997 (LOC282997), non-coding RNA [NR_026932]                                                         |
| GHRL         | A_23_P40956    | 1.76E-02 | 2.60  | ghrelin/obestatin prepropeptide                                                                  | Homo sapiens ghrelin/obestatin prepropeptide (GHRL), transcript variant 1, mRNA [NM_016362]                                            |
| TTC18        | A_23_P326931   | 1.76E-02 | 2.01  | tetratricopeptide repeat domain 18                                                               | Homo sapiens tetratricopeptide repeat domain 18 (TTC18), mRNA [NM_145170]                                                              |
| CCL19        | A_23_P123853   | 1.76E-02 | 16.14 | chemokine (C-C motif) ligand 19                                                                  | Homo sapiens chemokine (C-C motif) ligand 19 (CCL19), mRNA [NM_006274]                                                                 |
| BACH2        | A_23_P30634    | 1.76E-02 | 2.01  | BTB and CNC homology 1, basic leucine zipper transcription factor 2                              | Homo sapiens BTB and CNC homology 1, basic leucine zipper transcription factor 2 (BACH2), transcript variant 1, mRNA [NM_021813]       |
| TGM1         | A_23_P65618    | 1.77E-02 | 2.79  | transglutaminase 1 (K polypeptide epidermal type I, protein-glutamine-gamma-glutamyltransferase) | Homo sapiens transglutaminase 1 (K polypeptide epidermal type I, protein-glutamine-gamma-glutamyltransferase) (TGM1), mRNA [NM_000359] |
| LOC100272228 | A_19_P00320226 | 1.77E-02 | 2.64  | uncharacterized LOC100272228                                                                     | Homo sapiens uncharacterized LOC100272228 (LOC100272228), non-coding RNA [NR_027456]                                                   |
| MATL2963     | A_33_P3365408  | 1.77E-02 | 4.35  | uncharacterized LOC283314                                                                        | Homo sapiens uncharacterized LOC283314 (MATL2963), non-coding RNA [NR_026947]                                                          |

|              |               |          |       |                                                                |                                                                                                                                |
|--------------|---------------|----------|-------|----------------------------------------------------------------|--------------------------------------------------------------------------------------------------------------------------------|
| CYTH4        | A_24_P74559   | 1.77E-02 | 3.33  | cytohesin 4                                                    | Homo sapiens cytohesin 4 (CYTH4), mRNA [NM_013385]                                                                             |
| GOLM1        | A_33_P3231653 | 1.77E-02 | 2.10  | golgi membrane protein 1                                       | Homo sapiens golgi membrane protein 1 (GOLM1), transcript variant 1, mRNA [NM_016548]                                          |
| LOC100130430 | A_33_P3227934 | 1.77E-02 | -2.08 | uncharacterized LOC100130430                                   | Homo sapiens cDNA FLJ45052 fis, clone BRAWH3022542. [AK126997]                                                                 |
| SSC5D        | A_33_P3358898 | 1.77E-02 | 5.08  | scavenger receptor cysteine rich domain containing (5 domains) | Homo sapiens scavenger receptor cysteine rich domain containing (5 domains) (SSC5D), transcript variant 1, mRNA [NM_001144950] |
| C17orf66     | A_23_P430792  | 1.77E-02 | 2.85  | chromosome 17 open reading frame 66                            | Homo sapiens chromosome 17 open reading frame 66 (C17orf66), mRNA [NM_152781]                                                  |
| LOC100129034 | A_32_P91042   | 1.78E-02 | 2.03  | uncharacterized LOC100129034                                   | Homo sapiens uncharacterized LOC100129034 (LOC100129034), non-coding RNA [NR_027406]                                           |
| AMD1         | A_24_P371962  | 1.79E-02 | -2.24 | adenosylmethionine decarboxylase 1                             | Homo sapiens adenosylmethionine decarboxylase 1 (AMD1), transcript variant 1, mRNA [NM_001634]                                 |
| TMEM189      | A_33_P3259801 | 1.79E-02 | -2.20 | transmembrane protein 189                                      | Homo sapiens transmembrane protein 189 (TMEM189), transcript variant 1, mRNA [NM_199129]                                       |
| NOTCH2NL     | A_33_P3212640 | 1.80E-02 | 2.70  | notch 2 N-terminal like                                        | Homo sapiens notch 2 N-terminal like (NOTCH2NL), mRNA [NM_203458]                                                              |
| ACR          | A_32_P191262  | 1.80E-02 | -2.10 | acrosin                                                        | Homo sapiens acrosin (ACR), mRNA [NM_001097]                                                                                   |
| CABLES2      | A_23_P307761  | 1.82E-02 | -2.36 | Cdk5 and Abl enzyme substrate 2                                | Homo sapiens Cdk5 and Abl enzyme substrate 2 (CABLES2), mRNA [NM_031215]                                                       |
| ANKRD30BP2   | A_24_P917819  | 1.82E-02 | 5.11  | ankyrin repeat domain 30B pseudogene 2                         | Homo sapiens ankyrin repeat domain 30B pseudogene 2 (ANKRD30BP2), non-coding RNA [NR_026916]                                   |

|           |               |          |       |                                                  |                                                                                                           |
|-----------|---------------|----------|-------|--------------------------------------------------|-----------------------------------------------------------------------------------------------------------|
| PDE9A     | A_33_P3419594 | 1.82E-02 | -3.64 | phosphodiesterase 9A                             | Homo sapiens cDNA FLJ90181 fis, clone MAMMA1000706. [AK074662]                                            |
| LOC284108 | A_33_P3634554 | 1.83E-02 | 2.50  | uncharacterized LOC284108                        | full-length cDNA clone CSODB003YF07 of Neuroblastoma Cot 10-normalized of Homo sapiens (human) [CR616125] |
| RGS10     | A_23_P138717  | 1.83E-02 | 3.43  | regulator of G-protein signaling 10              | Homo sapiens regulator of G-protein signaling 10 (RGS10), transcript variant 1, mRNA [NM_001005339]       |
| COTL1     | A_24_P416131  | 1.84E-02 | 3.90  | coactosin-like 1 (Dictyostelium)                 | Homo sapiens coactosin-like 1 (Dictyostelium) (COTL1), mRNA [NM_021149]                                   |
| LOC388780 | A_33_P3241661 | 1.85E-02 | -2.20 | uncharacterized LOC388780                        | PREDICTED: Homo sapiens hypothetical LOC388780 (LOC388780), miscRNA [XR_109642]                           |
| CTRC      | A_23_P34852   | 1.85E-02 | -2.12 | chymotrypsin C (caldecrin)                       | Homo sapiens chymotrypsin C (caldecrin) (CTRC), mRNA [NM_007272]                                          |
| COL4A3    | A_23_P170679  | 1.85E-02 | 2.47  | collagen, type IV, alpha 3 (Goodpasture antigen) | Homo sapiens collagen, type IV, alpha 3 (Goodpasture antigen) (COL4A3), mRNA [NM_000091]                  |
| TONSL     | A_24_P1054    | 1.85E-02 | -2.26 | tonsoku-like, DNA repair protein                 | Homo sapiens tonsoku-like, DNA repair protein (TONSL), mRNA [NM_013432]                                   |
| HMG2      | A_32_P41487   | 1.85E-02 | 2.14  | high mobility group nucleosomal binding domain 2 | Homo sapiens high mobility group nucleosomal binding domain 2 (HMG2), mRNA [NM_005517]                    |
| LMO3      | A_24_P381441  | 1.86E-02 | 5.29  | LIM domain only 3 (rhombotin-like 2)             | Homo sapiens LIM domain only 3 (rhombotin-like 2) (LMO3), transcript variant 1, mRNA [NM_018640]          |
| COL6A6    | A_32_P224525  | 1.86E-02 | 4.55  | collagen, type VI, alpha 6                       | Homo sapiens collagen, type VI, alpha 6 (COL6A6), mRNA [NM_001102608]                                     |
| ANKRD22   | A_33_P3407880 | 1.87E-02 | 9.33  | ankyrin repeat domain 22                         | Homo sapiens ankyrin repeat domain 22 (ANKRD22), mRNA [NM_144590]                                         |
| ARHGAP9   | A_23_P64661   | 1.87E-02 | 4.34  | Rho GTPase activating protein 9                  | Homo sapiens Rho GTPase activating protein 9 (ARHGAP9), transcript variant                                |

|          |               |          |       |                                                           |                                                                                                                                    |
|----------|---------------|----------|-------|-----------------------------------------------------------|------------------------------------------------------------------------------------------------------------------------------------|
| NRADDP   | A_33_P3386150 | 1.88E-02 | 2.61  | neurotrophin receptor associated death domain, pseudogene | 1, mRNA [NM_032496]<br>Homo sapiens neurotrophin receptor associated death domain, pseudogene (NRADDP), non-coding RNA [NR_024046] |
| ZC3HAV1  | A_33_P3397418 | 1.90E-02 | 2.13  | zinc finger CCCH-type, antiviral 1                        | Homo sapiens zinc finger CCCH-type, antiviral 1 (ZC3HAV1), transcript variant 1, mRNA [NM_020119]                                  |
| RASL10B  | A_24_P322229  | 1.90E-02 | -2.19 | RAS-like, family 10, member B                             | Homo sapiens RAS-like, family 10, member B (RASL10B), mRNA [NM_033315]                                                             |
| FANCD2   | A_33_P3257808 | 1.90E-02 | 2.86  | Fanconi anemia, complementation group D2                  | Homo sapiens Fanconi anemia, complementation group D2 (FANCD2), transcript variant 2, mRNA [NM_001018115]                          |
| DHX58    | A_23_P38346   | 1.91E-02 | 2.17  | DEXH (Asp-Glu-X-His) box polypeptide 58                   | Homo sapiens DEXH (Asp-Glu-X-His) box polypeptide 58 (DHX58), mRNA [NM_024119]                                                     |
| S100A16  | A_23_P147918  | 1.92E-02 | -2.23 | S100 calcium binding protein A16                          | Homo sapiens S100 calcium binding protein A16 (S100A16), mRNA [NM_080388]                                                          |
| RANBP6   | A_23_P146379  | 1.93E-02 | -2.06 | RAN binding protein 6                                     | Homo sapiens RAN binding protein 6 (RANBP6), transcript variant 1, mRNA [NM_012416]                                                |
| TJP2     | A_33_P3215529 | 1.93E-02 | -2.02 | tight junction protein 2 (zona occludens 2)               | Homo sapiens tight junction protein ZO-2 isoform C mRNA, partial cds. [AF083893]                                                   |
| STAT1    | A_24_P274270  | 1.93E-02 | 3.87  | signal transducer and activator of transcription 1, 91kDa | Homo sapiens signal transducer and activator of transcription 1, 91kDa (STAT1), transcript variant beta, mRNA [NM_139266]          |
| SLC25A34 | A_33_P3227904 | 1.93E-02 | 3.80  | solute carrier family 25, member 34                       | Homo sapiens solute carrier family 25, member 34 (SLC25A34), mRNA                                                                  |

|              |               |          |       |                                                            |                                                                                                                      |
|--------------|---------------|----------|-------|------------------------------------------------------------|----------------------------------------------------------------------------------------------------------------------|
| CLEC4E       | A_33_P3318509 | 1.93E-02 | 3.58  | C-type lectin domain family 4, member E                    | [NM_207348]<br>Homo sapiens C-type lectin domain family 4, member E (CLEC4E), mRNA                                   |
| SYK          | A_23_P9255    | 1.93E-02 | 3.99  | spleen tyrosine kinase                                     | [NM_014358]<br>Homo sapiens spleen tyrosine kinase (SYK), transcript variant 1, mRNA                                 |
| USP51        | A_33_P3301915 | 1.93E-02 | 3.02  | ubiquitin specific peptidase 51                            | [NM_003177]<br>Homo sapiens ubiquitin specific peptidase 51 (USP51), mRNA                                            |
| CLEC4A       | A_23_P48029   | 1.94E-02 | 3.23  | C-type lectin domain family 4, member A                    | [NM_201286]<br>Homo sapiens C-type lectin domain family 4, member A (CLEC4A), transcript variant 1, mRNA [NM_016184] |
| TTC24        | A_33_P3297345 | 1.94E-02 | 3.16  | tetratricopeptide repeat domain 24                         | Homo sapiens tetratricopeptide repeat domain 24 (TTC24), mRNA [NM_001105669]                                         |
| LOC100131564 | A_24_P481375  | 1.95E-02 | 3.08  | uncharacterized LOC100131564                               | Homo sapiens uncharacterized LOC100131564 (LOC100131564), non-coding RNA [NR_034089]                                 |
| LOC144571    | A_33_P3280950 | 1.95E-02 | 2.59  | uncharacterized LOC144571                                  | Homo sapiens uncharacterized LOC144571 (LOC144571), non-coding RNA [NR_026971]                                       |
| AIF1         | A_23_P214627  | 1.96E-02 | 4.25  | allograft inflammatory factor 1                            | Homo sapiens allograft inflammatory factor 1 (AIF1), transcript variant 2, mRNA [NM_004847]                          |
| CA13         | A_23_P381714  | 1.96E-02 | -2.34 | carbonic anhydrase XIII                                    | Homo sapiens carbonic anhydrase XIII (CA13), mRNA [NM_198584]                                                        |
| PPPDE2       | A_23_P356330  | 1.96E-02 | -2.08 | PPPDE peptidase domain containing 2                        | Homo sapiens PPPDE peptidase domain containing 2 (PPPDE2), mRNA [NM_015704]                                          |
| RASGRP1      | A_23_P124642  | 1.96E-02 | 5.04  | RAS guanyl releasing protein 1 (calcium and DAG-regulated) | Homo sapiens RAS guanyl releasing protein 1 (calcium and DAG-regulated) (RASGRP1), transcript variant 1, mRNA        |

|          |               |          |       |                                                                     |                                                                                                            |
|----------|---------------|----------|-------|---------------------------------------------------------------------|------------------------------------------------------------------------------------------------------------|
| HHAT     | A_23_P136355  | 1.97E-02 | 2.10  | hedgehog acyltransferase                                            | [NM_005739]<br>Homo sapiens hedgehog acyltransferase (HHAT), transcript variant 1, mRNA [NM_018194]        |
| SLC36A4  | A_23_P86838   | 1.97E-02 | -2.37 | solute carrier family 36 (proton/amino acid symporter), member 4    | Homo sapiens solute carrier family 36 (proton/amino acid symporter), member 4 (SLC36A4), mRNA [NM_152313]  |
| UMOD     | A_23_P158775  | 1.97E-02 | -2.18 | uromodulin                                                          | Homo sapiens uromodulin (UMOD), transcript variant 1, mRNA [NM_003361]                                     |
| FLJ46906 | A_33_P3340490 | 1.98E-02 | 3.66  | uncharacterized LOC441172                                           | Homo sapiens uncharacterized LOC441172 (FLJ46906), non-coding RNA [NR_033896]                              |
| LPCAT3   | A_33_P3295283 | 1.98E-02 | -2.18 | lysophosphatidylcholine acyltransferase 3                           | Homo sapiens lysophosphatidylcholine acyltransferase 3 (LPCAT3), mRNA [NM_005768]                          |
| C19orf23 | A_33_P3851788 | 1.98E-02 | -5.12 | chromosome 19 open reading frame 23                                 | Homo sapiens chromosome 19 open reading frame 23 (C19orf23), non-coding RNA [NR_027271]                    |
| OASL     | A_23_P139786  | 1.99E-02 | 4.18  | 2'-5'-oligoadenylate synthetase-like                                | Homo sapiens 2'-5'-oligoadenylate synthetase-like (OASL), transcript variant 1, mRNA [NM_003733]           |
| SPN      | A_33_P3404706 | 2.00E-02 | 2.39  | sialophorin                                                         | Homo sapiens sialophorin (SPN), transcript variant 1, mRNA [NM_001030288]                                  |
| KCNA7    | A_23_P164897  | 2.02E-02 | -7.82 | potassium voltage-gated channel, shaker-related subfamily, member 7 | Homo sapiens potassium voltage-gated channel, shaker-related subfamily, member 7 (KCNA7), mRNA [NM_031886] |
| PIP4K2A  | A_33_P3394065 | 2.02E-02 | 2.77  | phosphatidylinositol-5-phosphate 4-kinase, type II, alpha           | phosphatidylinositol-5-phosphate 4-kinase, type II, alpha [Source:HGNC Symbol;Acc:8997] [ENST00000376565]  |
| HOOK1    | A_24_P921897  | 2.02E-02 | -4.28 | hook homolog 1 (Drosophila)                                         | Homo sapiens hook homolog 1 (Drosophila) (HOOK1), mRNA                                                     |

|           |               |          |       |                                                            |                                                                                                          |
|-----------|---------------|----------|-------|------------------------------------------------------------|----------------------------------------------------------------------------------------------------------|
| C4orf50   | A_33_P3237507 | 2.02E-02 | 2.60  | chromosome 4 open reading frame 50                         | [NM_015888]<br>chromosome 4 open reading frame 50<br>[Source:HGNC Symbol;Acc:33766]<br>[ENST00000531445] |
| KLHL6     | A_23_P212655  | 2.02E-02 | 4.50  | kelch-like 6 (Drosophila)                                  | Homo sapiens kelch-like 6 (Drosophila) (KLHL6), mRNA [NM_130446]                                         |
| UCMA      | A_24_P18270   | 2.03E-02 | 4.17  | upper zone of growth plate and cartilage matrix associated | Homo sapiens upper zone of growth plate and cartilage matrix associated (UCMA), mRNA [NM_145314]         |
| BMP6      | A_23_P19624   | 2.03E-02 | 2.92  | bone morphogenetic protein 6                               | Homo sapiens bone morphogenetic protein 6 (BMP6), mRNA [NM_001718]                                       |
| CCDC168   | A_33_P3307008 | 2.04E-02 | 3.94  | coiled-coil domain containing 168                          | Homo sapiens coiled-coil domain containing 168 (CCDC168), mRNA [NM_001146197]                            |
| SLC6A18   | A_24_P212234  | 2.04E-02 | -2.21 | solute carrier family 6, member 18                         | Homo sapiens solute carrier family 6, member 18 (SLC6A18), mRNA [NM_182632]                              |
| CD200R1   | A_23_P325155  | 2.04E-02 | 2.55  | CD200 receptor 1                                           | Homo sapiens CD200 receptor 1 (CD200R1), transcript variant 2, mRNA [NM_138939]                          |
| PYGM      | A_23_P405815  | 2.04E-02 | -2.33 | phosphorylase, glycogen, muscle                            | Homo sapiens phosphorylase, glycogen, muscle (PYGM), transcript variant 1, mRNA [NM_005609]              |
| TFE3      | A_23_P84952   | 2.04E-02 | -2.63 | transcription factor binding to IGHM enhancer 3            | Homo sapiens transcription factor binding to IGHM enhancer 3 (TFE3), mRNA [NM_006521]                    |
| LOC729451 | A_33_P3279515 | 2.05E-02 | -2.39 | uncharacterized LOC729451                                  | Homo sapiens cDNA FLJ39579 fis, clone SKMUS2003168. [AK096898]                                           |
| GLT8D2    | A_23_P48198   | 2.05E-02 | 2.87  | glycosyltransferase 8 domain containing 2                  | Homo sapiens glycosyltransferase 8 domain containing 2 (GLT8D2), mRNA [NM_031302]                        |
| HLA-DRB1  | A_24_P343233  | 2.06E-02 | 3.14  | major histocompatibility complex, class II, DR beta 1      | Homo sapiens major histocompatibility complex, class II, DR beta 1 (HLA-DRB1),                           |

|          |               |          |       |                                                             |                                                                                                                                                 |
|----------|---------------|----------|-------|-------------------------------------------------------------|-------------------------------------------------------------------------------------------------------------------------------------------------|
| AMIGO2   | A_23_P14083   | 2.06E-02 | 2.39  | adhesion molecule with Ig-like domain 2                     | transcript variant 1, mRNA [NM_002124]<br>Homo sapiens adhesion molecule with Ig-like domain 2 (AMIGO2), transcript variant 2, mRNA [NM_181847] |
| FERMT3   | A_23_P64044   | 2.06E-02 | 3.54  | fermitin family member 3                                    | Homo sapiens fermitin family member 3 (FERMT3), transcript variant URP2LF, mRNA [NM_178443]                                                     |
| GATA4    | A_23_P384761  | 2.06E-02 | -2.11 | GATA binding protein 4                                      | Homo sapiens GATA binding protein 4 (GATA4), mRNA [NM_002052]                                                                                   |
| OR10G2   | A_33_P3225507 | 2.06E-02 | -4.18 | olfactory receptor, family 10, subfamily G, member 2        | Homo sapiens olfactory receptor, family 10, subfamily G, member 2 (OR10G2), mRNA [NM_001005466]                                                 |
| FLJ10661 | A_33_P3421200 | 2.06E-02 | 2.23  | family with sequence similarity 86, member A pseudogene     | Homo sapiens family with sequence similarity 86, member A pseudogene (FLJ10661), transcript variant 2, non-coding RNA [NR_024361]               |
| WWC1     | A_23_P81392   | 2.06E-02 | -3.39 | WW and C2 domain containing 1                               | Homo sapiens WW and C2 domain containing 1 (WWC1), transcript variant 3, mRNA [NM_015238]                                                       |
| SLC27A2  | A_23_P140450  | 2.06E-02 | 3.23  | solute carrier family 27 (fatty acid transporter), member 2 | Homo sapiens solute carrier family 27 (fatty acid transporter), member 2 (SLC27A2), transcript variant 1, mRNA [NM_003645]                      |
| C1S      | A_23_P2492    | 2.06E-02 | 2.42  | complement component 1, s subcomponent                      | Homo sapiens complement component 1, s subcomponent (C1S), transcript variant 2, mRNA [NM_001734]                                               |
| ARHGEF16 | A_23_P114670  | 2.07E-02 | -2.75 | Rho guanine nucleotide exchange factor (GEF) 16             | Homo sapiens Rho guanine nucleotide exchange factor (GEF) 16 (ARHGEF16), mRNA [NM_014448]                                                       |
| CXCL11   | A_23_P125278  | 2.07E-02 | 14.71 | chemokine (C-X-C motif) ligand 11                           | Homo sapiens chemokine (C-X-C motif) ligand 11 (CXCL11), mRNA [NM_005409]                                                                       |
| CNTNAP3B | A_33_P3321382 | 2.10E-02 | -3.17 | contactin associated protein-like 3B                        | contactin associated protein-like 3B [Source:HGNC Symbol;Acc:32035]                                                                             |

|          |               |          |       |                                                                  |                                                                                                                           |
|----------|---------------|----------|-------|------------------------------------------------------------------|---------------------------------------------------------------------------------------------------------------------------|
| DNAH1    | A_23_P18213   | 2.11E-02 | 2.26  | dynein, axonemal, heavy chain 1                                  | [ENST00000341990]<br>Homo sapiens dynein, axonemal, heavy chain 1 (DNAH1), mRNA [NM_015512]                               |
| C18orf54 | A_32_P162374  | 2.11E-02 | 2.69  | chromosome 18 open reading frame 54                              | Homo sapiens chromosome 18 open reading frame 54 (C18orf54), mRNA [NM_173529]                                             |
| TTC39B   | A_23_P390097  | 2.12E-02 | 2.28  | tetratricopeptide repeat domain 39B                              | Homo sapiens tetratricopeptide repeat domain 39B (TTC39B), transcript variant 1, mRNA [NM_152574]                         |
| COL5A1   | A_33_P3629678 | 2.13E-02 | 2.23  | collagen, type V, alpha 1                                        | Homo sapiens collagen, type V, alpha 1 (COL5A1), mRNA [NM_000093]                                                         |
| TCP11L2  | A_23_P419107  | 2.13E-02 | -2.03 | t-complex 11 (mouse)-like 2                                      | Homo sapiens t-complex 11 (mouse)-like 2 (TCP11L2), mRNA [NM_152772]                                                      |
| PARP4    | A_33_P3303259 | 2.14E-02 | 2.00  | poly (ADP-ribose) polymerase family, member 4                    | Homo sapiens poly (ADP-ribose) polymerase family, member 4 (PARP4), mRNA [NM_006437]                                      |
| SREBF1   | A_23_P129786  | 2.14E-02 | -2.08 | sterol regulatory element binding transcription factor 1         | Homo sapiens sterol regulatory element binding transcription factor 1 (SREBF1), transcript variant 1, mRNA [NM_001005291] |
| SCUBE2   | A_23_P105144  | 2.14E-02 | 4.59  | signal peptide, CUB domain, EGF-like 2                           | Homo sapiens signal peptide, CUB domain, EGF-like 2 (SCUBE2), transcript variant 1, mRNA [NM_020974]                      |
| IGFN1    | A_33_P3382100 | 2.14E-02 | 3.79  | immunoglobulin-like and fibronectin type III domain containing 1 | Homo sapiens immunoglobulin-like and fibronectin type III domain containing 1 (IGFN1), mRNA [NM_001164586]                |
| C1orf220 | A_33_P3259865 | 2.14E-02 | 3.07  | chromosome 1 open reading frame 220                              | Homo sapiens chromosome 1 open reading frame 220 (C1orf220), non-coding RNA [NR_033186]                                   |
| ZNF501   | A_33_P3257856 | 2.14E-02 | 2.69  | zinc finger protein 501                                          | Homo sapiens zinc finger protein 501 (ZNF501), mRNA [NM_145044]                                                           |
| CDC42    | A_23_P300056  | 2.15E-02 | -2.99 | cell division cycle 42 (GTP binding protein, 25kDa)              | Homo sapiens cell division cycle 42 (GTP binding protein, 25kDa) (CDC42),                                                 |

|         |               |          |       |                                                           |                                                                                                                              |
|---------|---------------|----------|-------|-----------------------------------------------------------|------------------------------------------------------------------------------------------------------------------------------|
| FNDC9   | A_33_P3385656 | 2.16E-02 | -2.08 | fibronectin type III domain containing 9                  | transcript variant 2, mRNA [NM_044472]<br>Homo sapiens fibronectin type III domain containing 9 (FNDC9), mRNA [NM_001001343] |
| SCN9A   | A_24_P3005    | 2.16E-02 | 2.73  | sodium channel, voltage-gated, type IX, alpha subunit     | Homo sapiens sodium channel, voltage-gated, type IX, alpha subunit (SCN9A), mRNA [NM_002977]                                 |
| RBP5    | A_24_P386746  | 2.16E-02 | 4.99  | retinol binding protein 5, cellular                       | Homo sapiens retinol binding protein 5, cellular (RBP5), mRNA [NM_031491]                                                    |
| NCF2    | A_23_P138194  | 2.16E-02 | 3.55  | neutrophil cytosolic factor 2                             | Homo sapiens neutrophil cytosolic factor 2 (NCF2), transcript variant 1, mRNA [NM_000433]                                    |
| FANK1   | A_23_P115785  | 2.16E-02 | 2.01  | fibronectin type III and ankyrin repeat domains 1         | Homo sapiens fibronectin type III and ankyrin repeat domains 1 (FANK1), mRNA [NM_145235]                                     |
| PRSS30P | A_23_P350719  | 2.16E-02 | 4.38  | protease, serine, 30 homolog (mouse), pseudogene          | Homo sapiens protease, serine, 30 homolog (mouse), pseudogene (PRSS30P), non-coding RNA [NR_026864]                          |
| GPT     | A_33_P3301871 | 2.16E-02 | -2.16 | glutamic-pyruvate transaminase (alanine aminotransferase) | Homo sapiens glutamic-pyruvate transaminase (alanine aminotransferase) (GPT), mRNA [NM_005309]                               |
| CCDC85C | A_23_P37391   | 2.16E-02 | -2.19 | coiled-coil domain containing 85C                         | Homo sapiens coiled-coil domain containing 85C (CCDC85C), mRNA [NM_001144995]                                                |
| DEFA7P  | A_33_P3298173 | 2.17E-02 | -2.05 | defensin, alpha 7 pseudogene                              | Homo sapiens defensin alpha 7 (DEFA7P) pseudogene mRNA, complete sequence. [AY746432]                                        |
| FST     | A_23_P110531  | 2.17E-02 | 3.24  | follistatin                                               | Homo sapiens follistatin (FST), transcript variant FST344, mRNA [NM_013409]                                                  |
| ART5    | A_23_P427122  | 2.17E-02 | -2.89 | ADP-ribosyltransferase 5                                  | Homo sapiens ADP-ribosyltransferase 5 (ART5), transcript variant 1, mRNA [NM_053017]                                         |

|              |                |          |       |                                                          |                                                                                                                    |
|--------------|----------------|----------|-------|----------------------------------------------------------|--------------------------------------------------------------------------------------------------------------------|
| TMEM63C      | A_33_P3406661  | 2.17E-02 | -3.06 | transmembrane protein 63C                                | Homo sapiens transmembrane protein 63C (TMEM63C), mRNA [NM_020431]                                                 |
| LSP1         | A_23_P13382    | 2.17E-02 | 3.06  | lymphocyte-specific protein 1                            | Homo sapiens lymphocyte-specific protein 1 (LSP1), transcript variant 3, mRNA [NM_001013254]                       |
| HLA-DRB5     | A_23_P45099    | 2.18E-02 | 4.16  | major histocompatibility complex, class II, DR beta 5    | Homo sapiens major histocompatibility complex, class II, DR beta 5 (HLA-DRB5), mRNA [NM_002125]                    |
| P2RX3        | A_23_P127721   | 2.18E-02 | -2.78 | purinergic receptor P2X, ligand-gated ion channel, 3     | Homo sapiens purinergic receptor P2X, ligand-gated ion channel, 3 (P2RX3), mRNA [NM_002559]                        |
| NPHP3        | A_33_P3228102  | 2.18E-02 | 2.09  | nephronophthisis 3 (adolescent)                          | Homo sapiens nephronophthisis 3 (adolescent) (NPHP3), mRNA [NM_153240]                                             |
| LOC100129826 | A_33_P3369245  | 2.19E-02 | -2.03 | uncharacterized LOC100129826                             | Homo sapiens cDNA FLJ44967 fis, clone BRAWH2016514. [AK126915]                                                     |
| PLEKHO1      | A_33_P3330039  | 2.19E-02 | -2.32 | pleckstrin homology domain containing, family O member 1 | Homo sapiens pleckstrin homology domain containing, family O member 1 (PLEKHO1), mRNA [NM_016274]                  |
| MSX1         | A_23_P110430   | 2.19E-02 | -2.74 | msh homeobox 1                                           | Homo sapiens msh homeobox 1 (MSX1), mRNA [NM_002448]                                                               |
| GPX3         | A_33_P3369371  | 2.21E-02 | -2.58 | glutathione peroxidase 3 (plasma)                        | Homo sapiens glutathione peroxidase 3 (plasma) (GPX3), mRNA [NM_002084]                                            |
| LONRF3       | A_23_P114414   | 2.21E-02 | -2.30 | LON peptidase N-terminal domain and ring finger 3        | Homo sapiens LON peptidase N-terminal domain and ring finger 3 (LONRF3), transcript variant 1, mRNA [NM_001031855] |
| NIPSNAP3B    | A_33_P3271001  | 2.21E-02 | -2.04 | nipsnap homolog 3B (C. elegans)                          | Homo sapiens nipsnap homolog 3B (C. elegans) (NIPSNAP3B), mRNA [NM_018376]                                         |
| IRF8         | A_33_P3343120  | 2.21E-02 | 4.61  | interferon regulatory factor 8                           | Homo sapiens interferon regulatory factor 8 (IRF8), mRNA [NM_002163]                                               |
| CYP1B1-AS1   | A_19_P00807643 | 2.22E-02 | 2.51  |                                                          | Homo sapiens CYP1B1 antisense RNA 1                                                                                |

|          |               |          |       |                                                               |                                                                                                                                  |
|----------|---------------|----------|-------|---------------------------------------------------------------|----------------------------------------------------------------------------------------------------------------------------------|
| ZNF594   | A_23_P321160  | 2.22E-02 | 2.01  | zinc finger protein 594                                       | (non-protein coding) (CYP1B1-AS1), non-coding RNA [NR_027252]<br>Homo sapiens zinc finger protein 594 (ZNF594), mRNA [NM_032530] |
| RASGRP3  | A_24_P54390   | 2.22E-02 | -2.18 | RAS guanyl releasing protein 3 (calcium and DAG-regulated)    | Homo sapiens RAS guanyl releasing protein 3 (calcium and DAG-regulated) (RASGRP3), transcript variant 2, mRNA [NM_170672]        |
| C1QA     | A_24_P222655  | 2.22E-02 | 4.35  | complement component 1, q subcomponent, A chain               | Homo sapiens complement component 1, q subcomponent, A chain (C1QA), mRNA [NM_015991]                                            |
| TPD52    | A_33_P3418838 | 2.24E-02 | -2.42 | tumor protein D52                                             | tumor protein D52 [Source:HGNC Symbol;Acc:12005] [ENST00000523564]                                                               |
| EIF4EBP2 | A_24_P115621  | 2.24E-02 | -2.08 | eukaryotic translation initiation factor 4E binding protein 2 | Homo sapiens eukaryotic translation initiation factor 4E binding protein 2 (EIF4EBP2), mRNA [NM_004096]                          |
| FOSL1    | A_23_P161624  | 2.24E-02 | -3.06 | FOS-like antigen 1                                            | Homo sapiens FOS-like antigen 1 (FOSL1), mRNA [NM_005438]                                                                        |
| ATXN2L   | A_33_P3369956 | 2.24E-02 | -2.30 | ataxin 2-like                                                 | Homo sapiens ataxin 2-like (ATXN2L), transcript variant E, mRNA [NM_148416]                                                      |
| CPO      | A_23_P102172  | 2.24E-02 | -2.13 | carboxypeptidase O                                            | Homo sapiens carboxypeptidase O (CPO), mRNA [NM_173077]                                                                          |
| HLA-J    | A_24_P418044  | 2.25E-02 | 2.36  | major histocompatibility complex, class I, J (pseudogene)     | Homo sapiens major histocompatibility complex, class I, J (pseudogene) (HLA-J), non-coding RNA [NR_024240]                       |
| LMO1     | A_23_P87310   | 2.25E-02 | -3.18 | LIM domain only 1 (rhombotin 1)                               | Homo sapiens LIM domain only 1 (rhombotin 1) (LMO1), mRNA [NM_002315]                                                            |
| TGM6     | A_33_P3249259 | 2.26E-02 | -3.33 | transglutaminase 6                                            | Homo sapiens transglutaminase 6 (TGM6), mRNA [NM_198994]                                                                         |
| FNBP1    | A_33_P3367565 | 2.27E-02 | 2.03  | formin binding protein 1                                      | formin binding protein 1 [Source:HGNC Symbol;Acc:17069] [ENST00000355681]                                                        |
| CENPE    | A_23_P253524  | 2.27E-02 | 2.88  | centromere protein E, 312kDa                                  | Homo sapiens centromere protein E,                                                                                               |

|          |               |          |       |                                                                   |                                                                                                                                                                 |
|----------|---------------|----------|-------|-------------------------------------------------------------------|-----------------------------------------------------------------------------------------------------------------------------------------------------------------|
| PITPNM1  | A_23_P1519    | 2.27E-02 | -2.09 | phosphatidylinositol transfer protein, membrane-associated 1      | 312kDa (CENPE), mRNA [NM_001813]<br>Homo sapiens phosphatidylinositol transfer protein, membrane-associated 1 (PITPNM1), transcript variant 1, mRNA [NM_004910] |
| ADCY7    | A_24_P416177  | 2.27E-02 | 3.35  | adenylate cyclase 7                                               | Homo sapiens adenylylate cyclase 7 (ADCY7), mRNA [NM_001114]                                                                                                    |
| ANGPTL5  | A_23_P64161   | 2.27E-02 | 5.09  | angiopoietin-like 5                                               | Homo sapiens angiopoietin-like 5 (ANGPTL5), mRNA [NM_178127]                                                                                                    |
| RMI2     | A_23_P353717  | 2.27E-02 | 3.57  | RMI2, RecQ mediated genome instability 2, homolog (S. cerevisiae) | Homo sapiens RMI2, RecQ mediated genome instability 2, homolog (S. cerevisiae) (RMI2), mRNA [NM_152308]                                                         |
| CYCS     | A_32_P174083  | 2.27E-02 | -2.02 | cytochrome c, somatic                                             | Homo sapiens cytochrome c, somatic (CYCS), nuclear gene encoding mitochondrial protein, mRNA [NM_018947]                                                        |
| KRBA1    | A_32_P38637   | 2.28E-02 | -2.13 | KRAB-A domain containing 1                                        | Homo sapiens KRAB-A domain containing 1 (KRBA1), mRNA [NM_032534]                                                                                               |
| KRTAP3-1 | A_33_P3382399 | 2.28E-02 | -3.81 | keratin associated protein 3-1                                    | Homo sapiens keratin associated protein 3-1 (KRTAP3-1), mRNA [NM_031958]                                                                                        |
| C8orf39  | A_23_P134729  | 2.28E-02 | -2.36 | chromosome 8 open reading frame 39                                | Homo sapiens chromosome 8 open reading frame 39 (C8orf39), non-coding RNA [NR_027259]                                                                           |
| MNS1     | A_23_P3302    | 2.28E-02 | 3.88  | meiosis-specific nuclear structural 1                             | Homo sapiens meiosis-specific nuclear structural 1 (MNS1), mRNA [NM_018365]                                                                                     |
| METTL7A  | A_23_P415021  | 2.29E-02 | 2.92  | methyltransferase like 7A                                         | Homo sapiens methyltransferase like 7A (METTL7A), mRNA [NM_014033]                                                                                              |
| ISLR     | A_23_P3312    | 2.29E-02 | 3.47  | immunoglobulin superfamily containing leucine-rich repeat         | Homo sapiens immunoglobulin superfamily containing leucine-rich repeat (ISLR), transcript variant 1, mRNA [NM_005545]                                           |

|          |               |          |       |                                                                                                  |                                                                                                                                                        |
|----------|---------------|----------|-------|--------------------------------------------------------------------------------------------------|--------------------------------------------------------------------------------------------------------------------------------------------------------|
| C12orf34 | A_23_P128375  | 2.30E-02 | -3.60 | chromosome 12 open reading frame 34                                                              | Homo sapiens chromosome 12 open reading frame 34 (C12orf34), mRNA [NM_032829]                                                                          |
| TMOD4    | A_23_P126605  | 2.30E-02 | 3.10  | tropomodulin 4 (muscle)                                                                          | Homo sapiens tropomodulin 4 (muscle) (TMOD4), mRNA [NM_013353]                                                                                         |
| KMO      | A_24_P77082   | 2.30E-02 | 3.04  | kynurenine 3-monooxygenase (kynurenine 3-hydroxylase)                                            | Homo sapiens kynurenine 3-monooxygenase (kynurenine 3-hydroxylase) (KMO), mRNA [NM_003679]                                                             |
| COL1A2   | A_24_P277934  | 2.30E-02 | 2.88  | collagen, type I, alpha 2                                                                        | Homo sapiens collagen, type I, alpha 2 (COL1A2), mRNA [NM_000089]                                                                                      |
| WNT3A    | A_33_P3417502 | 2.30E-02 | -2.56 | wingless-type MMTV integration site family, member 3A                                            | Homo sapiens wingless-type MMTV integration site family, member 3A (WNT3A), mRNA [NM_033131]                                                           |
| CACNA2D4 | A_23_P353014  | 2.30E-02 | 2.13  | calcium channel, voltage-dependent, alpha 2/delta subunit 4                                      | Homo sapiens calcium channel, voltage-dependent, alpha 2/delta subunit 4 (CACNA2D4), mRNA [NM_172364]                                                  |
| STK10    | A_33_P3389153 | 2.30E-02 | 2.08  | serine/threonine kinase 10                                                                       | Homo sapiens serine/threonine kinase 10 (STK10), mRNA [NM_005990]                                                                                      |
| KCNN2    | A_23_P500353  | 2.30E-02 | -3.23 | potassium intermediate/small conductance calcium-activated channel, subfamily N, member 2        | Homo sapiens potassium intermediate/small conductance calcium-activated channel, subfamily N, member 2 (KCNN2), transcript variant 1, mRNA [NM_021614] |
| MLF1IP   | A_23_P254733  | 2.31E-02 | 3.23  | MLF1 interacting protein                                                                         | Homo sapiens MLF1 interacting protein (MLF1IP), mRNA [NM_024629]                                                                                       |
| HELLS    | A_23_P12816   | 2.32E-02 | 3.33  | helicase, lymphoid-specific                                                                      | Homo sapiens helicase, lymphoid-specific (HELLS), mRNA [NM_018063]                                                                                     |
| GALNT12  | A_23_P415652  | 2.33E-02 | 2.87  | UDP-N-acetyl-alpha-D-galactosamine:polypeptide N-acetylgalactosaminyltransferase 12 (GalNAc-T12) | Homo sapiens UDP-N-acetyl-alpha-D-galactosamine:polypeptide N-acetylgalactosaminyltransferase 12 (GalNAc-T12) (GALNT12), mRNA [NM_024642]              |

|              |               |          |       |                                                                            |                                                                                                                                          |
|--------------|---------------|----------|-------|----------------------------------------------------------------------------|------------------------------------------------------------------------------------------------------------------------------------------|
| TPSD1        | A_23_P140716  | 2.33E-02 | 2.08  | tryptase delta 1                                                           | Homo sapiens tryptase delta 1 (TPSD1), mRNA [NM_012217]                                                                                  |
| LOC100128946 | A_33_P3384502 | 2.33E-02 | -2.41 | uncharacterized LOC100128946                                               | Homo sapiens uncharacterized LOC100128946 (LOC100128946), non-coding RNA [NR_038944]                                                     |
| TMEM38A      | A_23_P101392  | 2.34E-02 | -2.30 | transmembrane protein 38A                                                  | Homo sapiens transmembrane protein 38A (TMEM38A), mRNA [NM_024074]                                                                       |
| CD33         | A_23_P331748  | 2.35E-02 | 3.81  | CD33 molecule                                                              | Homo sapiens CD33 molecule (CD33), transcript variant 1, mRNA [NM_001772]                                                                |
| CAPN12       | A_24_P79040   | 2.35E-02 | 3.39  | calpain 12                                                                 | Homo sapiens calpain 12 (CAPN12), mRNA [NM_144691]                                                                                       |
| KRTAP12-1    | A_24_P66312   | 2.35E-02 | -2.32 | keratin associated protein 12-1                                            | Homo sapiens keratin associated protein 12-1 (KRTAP12-1), mRNA [NM_181686]                                                               |
| IL5RA        | A_33_P3328254 | 2.36E-02 | 4.92  | interleukin 5 receptor, alpha                                              | Homo sapiens interleukin 5 receptor, alpha (IL5RA), transcript variant 3, mRNA [NM_175725]                                               |
| ZNF599       | A_24_P353103  | 2.36E-02 | 2.32  | zinc finger protein 599                                                    | Homo sapiens zinc finger protein 599 (ZNF599), mRNA [NM_001007248]                                                                       |
| SVEP1        | A_23_P216596  | 2.37E-02 | 2.73  | sushi, von Willebrand factor type A, EGF and pentraxin domain containing 1 | Homo sapiens sushi, von Willebrand factor type A, EGF and pentraxin domain containing 1 (SVEP1), mRNA [NM_153366]                        |
| VIPR2        | A_23_P145978  | 2.38E-02 | -2.02 | vasoactive intestinal peptide receptor 2                                   | Homo sapiens vasoactive intestinal peptide receptor 2 (VIPR2), mRNA [NM_003382]                                                          |
| GZMM         | A_23_P130836  | 2.38E-02 | 2.42  | granzyme M (lymphocyte met-ase 1)                                          | Homo sapiens granzyme M (lymphocyte met-ase 1) (GZMM), mRNA [NM_005317]                                                                  |
| CD74         | A_23_P70095   | 2.38E-02 | 3.16  | CD74 molecule, major histocompatibility complex, class II invariant chain  | Homo sapiens CD74 molecule, major histocompatibility complex, class II invariant chain (CD74), transcript variant 3, mRNA [NM_001025158] |
| KIF11        | A_24_P227091  | 2.38E-02 | 2.56  | kinesin family member 11                                                   | Homo sapiens kinesin family member 11                                                                                                    |

|          |               |          |       |                                                                  |                                                                                                                                        |
|----------|---------------|----------|-------|------------------------------------------------------------------|----------------------------------------------------------------------------------------------------------------------------------------|
| B4GALT6  | A_24_P228228  | 2.38E-02 | -2.11 | UDP-Gal:betaGlcNAc beta 1,4-galactosyltransferase, polypeptide 6 | (KIF11), mRNA [NM_004523]<br>Homo sapiens UDP-Gal:betaGlcNAc beta 1,4-galactosyltransferase, polypeptide 6 (B4GALT6), mRNA [NM_004775] |
| ZCCHC5   | A_23_P411353  | 2.38E-02 | 3.75  | zinc finger, CCHC domain containing 5                            | Homo sapiens zinc finger, CCHC domain containing 5 (ZCCHC5), mRNA [NM_152694]                                                          |
| SLC25A45 | A_23_P422511  | 2.38E-02 | 2.18  | solute carrier family 25, member 45                              | Homo sapiens solute carrier family 25, member 45 (SLC25A45), transcript variant 1, mRNA [NM_182556]                                    |
| RINL     | A_33_P3407895 | 2.39E-02 | 2.07  | Ras and Rab interactor-like                                      | Homo sapiens Ras and Rab interactor-like (RINL), transcript variant 1, mRNA [NM_001195833]                                             |
| GLB1L    | A_23_P218579  | 2.39E-02 | 2.14  | galactosidase, beta 1-like                                       | Homo sapiens galactosidase, beta 1-like (GLB1L), mRNA [NM_024506]                                                                      |
| NOTCH2   | A_33_P3258824 | 2.41E-02 | 2.30  | notch 2                                                          | Homo sapiens notch 2 (NOTCH2), transcript variant 2, mRNA [NM_001200001]                                                               |
| KIAA1257 | A_32_P163739  | 2.41E-02 | 2.08  | KIAA1257                                                         | Homo sapiens KIAA1257 (KIAA1257), mRNA [NM_020741]                                                                                     |
| F2RL2    | A_32_P60065   | 2.42E-02 | 5.19  | coagulation factor II (thrombin) receptor-like 2                 | Homo sapiens coagulation factor II (thrombin) receptor-like 2 (F2RL2), mRNA [NM_004101]                                                |
| PARD6B   | A_33_P3227457 | 2.42E-02 | -2.45 | par-6 partitioning defective 6 homolog beta (C. elegans)         | par-6 partitioning defective 6 homolog beta (C. elegans) [Source:HGNC Symbol;Acc:16245] [ENST00000396039]                              |
| MELK     | A_23_P94422   | 2.42E-02 | 2.26  | maternal embryonic leucine zipper kinase                         | Homo sapiens maternal embryonic leucine zipper kinase (MELK), mRNA [NM_014791]                                                         |
| ATL1     | A_23_P88351   | 2.42E-02 | 2.05  | atlastin GTPase 1                                                | Homo sapiens atlastin GTPase 1 (ATL1), transcript variant 2, mRNA [NM_181598]                                                          |
| RANBP17  | A_23_P58819   | 2.43E-02 | 3.35  | RAN binding protein 17                                           | Homo sapiens RAN binding protein 17 (RANBP17), mRNA [NM_022897]                                                                        |

|          |               |          |       |                                                                     |                                                                                                                                  |
|----------|---------------|----------|-------|---------------------------------------------------------------------|----------------------------------------------------------------------------------------------------------------------------------|
| HCG26    | A_32_P220770  | 2.44E-02 | 3.66  | HLA complex group 26 (non-protein coding)                           | Homo sapiens HLA complex group 26 (non-protein coding) (HCG26), non-coding RNA [NR_002812]                                       |
| SLFN12L  | A_33_P3261468 | 2.44E-02 | 2.33  | schlafen family member 12-like                                      | Homo sapiens schlafen family member 12-like (SLFN12L), mRNA [NM_001195790]                                                       |
| CCL14    | A_23_P218369  | 2.45E-02 | 4.11  | chemokine (C-C motif) ligand 14                                     | Homo sapiens chemokine (C-C motif) ligand 14 (CCL14), transcript variant 3, mRNA [NM_032963]                                     |
| XAF1     | A_33_P3258346 | 2.45E-02 | 2.49  | XIAP associated factor 1                                            | Homo sapiens XIAP associated factor 1 (XAF1), transcript variant 1, mRNA [NM_017523]                                             |
| PROSER1  | A_33_P3398533 | 2.45E-02 | -2.18 | proline and serine rich 1                                           | Homo sapiens proline and serine rich 1 (PROSER1), transcript variant 1, mRNA [NM_025138]                                         |
| GRID2IP  | A_33_P3411097 | 2.45E-02 | -4.44 | glutamate receptor, ionotropic, delta 2 (Grid2) interacting protein | Homo sapiens glutamate receptor, ionotropic, delta 2 (Grid2) interacting protein (GRID2IP), mRNA [NM_001145118]                  |
| JSRP1    | A_23_P397320  | 2.45E-02 | 10.87 | junctional sarcoplasmic reticulum protein 1                         | Homo sapiens junctional sarcoplasmic reticulum protein 1 (JSRP1), mRNA [NM_144616]                                               |
| CATSPER1 | A_23_P52676   | 2.45E-02 | 3.02  | cation channel, sperm associated 1                                  | Homo sapiens cation channel, sperm associated 1 (CATSPER1), mRNA [NM_053054]                                                     |
| MGC34800 | A_33_P3373243 | 2.45E-02 | 2.02  | uncharacterized protein MGC34800                                    | PREDICTED: Homo sapiens hypothetical protein MGC34800 (MGC34800), miscRNA [XR_110135]                                            |
| DYRK3    | A_24_P345209  | 2.45E-02 | -2.14 | dual-specificity tyrosine-(Y)-phosphorylation regulated kinase 3    | Homo sapiens dual-specificity tyrosine-(Y)-phosphorylation regulated kinase 3 (DYRK3), transcript variant 2, mRNA [NM_001004023] |
| C7orf63  | A_33_P3615922 | 2.46E-02 | 2.61  | chromosome 7 open reading                                           | Homo sapiens chromosome 7 open                                                                                                   |

|           |              |          |       |                                                                       |                                                                                                                              |
|-----------|--------------|----------|-------|-----------------------------------------------------------------------|------------------------------------------------------------------------------------------------------------------------------|
|           |              |          |       | frame 63                                                              | reading frame 63 (C7orf63), transcript variant 1, mRNA [NM_001039706]                                                        |
| CD160     | A_23_P354341 | 2.47E-02 | 3.42  | CD160 molecule                                                        | Homo sapiens CD160 molecule (CD160), mRNA [NM_007053]                                                                        |
| SEL1L3    | A_23_P426021 | 2.47E-02 | 3.67  | sel-1 suppressor of lin-12-like 3 (C. elegans)                        | Homo sapiens sel-1 suppressor of lin-12-like 3 (C. elegans) (SEL1L3), mRNA [NM_015187]                                       |
| RBM43     | A_32_P116660 | 2.47E-02 | 2.46  | RNA binding motif protein 43                                          | Homo sapiens RNA binding motif protein 43 (RBM43), mRNA [NM_198557]                                                          |
| IRAK3     | A_23_P162300 | 2.47E-02 | 2.12  | interleukin-1 receptor-associated kinase 3                            | Homo sapiens interleukin-1 receptor-associated kinase 3 (IRAK3), transcript variant 1, mRNA [NM_007199]                      |
| SLCO5A1   | A_23_P135669 | 2.49E-02 | -3.45 | solute carrier organic anion transporter family, member 5A1           | Homo sapiens solute carrier organic anion transporter family, member 5A1 (SLCO5A1), transcript variant 1, mRNA [NM_030958]   |
| CFB       | A_23_P156687 | 2.49E-02 | 2.85  | complement factor B                                                   | Homo sapiens complement factor B (CFB), mRNA [NM_001710]                                                                     |
| APOA1     | A_23_P203191 | 2.50E-02 | 4.56  | apolipoprotein A-I                                                    | Homo sapiens apolipoprotein A-I (APOA1), mRNA [NM_000039]                                                                    |
| APBB3     | A_23_P110445 | 2.50E-02 | 2.01  | amyloid beta (A4) precursor protein-binding, family B, member 3       | Homo sapiens amyloid beta (A4) precursor protein-binding, family B, member 3 (APBB3), transcript variant 4, mRNA [NM_006051] |
| OBFC2A    | A_24_P229531 | 2.51E-02 | 3.60  | oligonucleotide/oligosaccharide-binding fold containing 2A            | Homo sapiens oligonucleotide/oligosaccharide-binding fold containing 2A (OBFC2A), transcript variant 1, mRNA [NM_001031716]  |
| CILP      | A_23_P151895 | 2.52E-02 | 3.69  | cartilage intermediate layer protein, nucleotide pyrophosphohydrolase | Homo sapiens cartilage intermediate layer protein, nucleotide pyrophosphohydrolase (CILP), mRNA [NM_003613]                  |
| LINC00346 | A_23_P368909 | 2.53E-02 | -2.24 | long intergenic non-protein                                           | Homo sapiens long intergenic non-                                                                                            |

|             |                |          |       |                                                       |                                                                                                                          |
|-------------|----------------|----------|-------|-------------------------------------------------------|--------------------------------------------------------------------------------------------------------------------------|
|             |                |          |       | coding RNA 346                                        | protein coding RNA 346 (LINC00346), non-coding RNA [NR_027701]                                                           |
| HLA-DQB1    | A_23_P8108     | 2.54E-02 | 3.78  | major histocompatibility complex, class II, DQ beta 1 | Homo sapiens major histocompatibility complex, class II, DQ beta 1 (HLA-DQB1), transcript variant 3, mRNA [NM_001243962] |
| RAB38       | A_23_P161563   | 2.54E-02 | 3.10  | RAB38, member RAS oncogene family                     | Homo sapiens RAB38, member RAS oncogene family (RAB38), mRNA [NM_022337]                                                 |
| LOC440149   | A_33_P3573141  | 2.55E-02 | 3.72  | uncharacterized LOC440149                             | Homo sapiens cDNA FLJ32523 fis, clone SMINT2000032. [AK057085]                                                           |
| TNFAIP8L2   | A_23_P46356    | 2.55E-02 | 4.12  | tumor necrosis factor, alpha-induced protein 8-like 2 | Homo sapiens tumor necrosis factor, alpha-induced protein 8-like 2 (TNFAIP8L2), mRNA [NM_024575]                         |
| LOC728503   | A_33_P3345931  | 2.58E-02 | -3.01 | uncharacterized LOC728503                             | PREDICTED: Homo sapiens hypothetical protein LOC728503 (LOC728503), mRNA [XM_001127575]                                  |
| NFAM1       | A_33_P3292769  | 2.58E-02 | 4.30  | NFAT activating protein with ITAM motif 1             | Homo sapiens NFAT activating protein with ITAM motif 1 (NFAM1), mRNA [NM_145912]                                         |
| PTH1R       | A_33_P3365368  | 2.61E-02 | -2.45 | parathyroid hormone 1 receptor                        | parathyroid hormone 1 receptor [Source:HGNC Symbol;Acc:9608] [ENST00000313063]                                           |
| XLOC_009868 | A_19_P00322036 | 2.63E-02 | -3.56 |                                                       | BROAD Institute lincRNA (XLOC_009868), lincRNA [TCONS_00020555]                                                          |
| LOC642980   | A_33_P3256880  | 2.63E-02 | -2.59 | uncharacterized LOC642980                             | Homo sapiens cDNA FLJ16523 fis, clone NT2RP8000521. [AK131413]                                                           |
| NAPSA       | A_23_P90130    | 2.65E-02 | 2.79  | napsin A aspartic peptidase                           | Homo sapiens napsin A aspartic peptidase (NAPSA), mRNA [NM_004851]                                                       |
| HAUS5       | A_23_P349771   | 2.65E-02 | 2.81  | HAUS augmin-like complex, subunit 5                   | Homo sapiens HAUS augmin-like complex, subunit 5 (HAUS5), mRNA [NM_015302]                                               |

|              |               |          |       |                                                                     |                                                                                                               |
|--------------|---------------|----------|-------|---------------------------------------------------------------------|---------------------------------------------------------------------------------------------------------------|
| RHEB         | A_33_P3413083 | 2.65E-02 | -2.09 | Ras homolog enriched in brain                                       | Homo sapiens Ras homolog enriched in brain (RHEB), mRNA [NM_005614]                                           |
| LOC100129399 | A_33_P3403937 | 2.66E-02 | 3.09  | uncharacterized LOC100129399                                        | Homo sapiens cDNA FLJ42017 fis, clone SPLEN2033153. [AK124011]                                                |
| PLK2         | A_23_P30254   | 2.66E-02 | -2.32 | polo-like kinase 2                                                  | Homo sapiens polo-like kinase 2 (PLK2), transcript variant 1, mRNA [NM_006622]                                |
| APOBEC3G     | A_23_P143713  | 2.66E-02 | 2.95  | apolipoprotein B mRNA editing enzyme, catalytic polypeptide-like 3G | Homo sapiens apolipoprotein B mRNA editing enzyme, catalytic polypeptide-like 3G (APOBEC3G), mRNA [NM_021822] |
| MAFB         | A_23_P17345   | 2.66E-02 | 3.07  | v-maf musculoaponeurotic fibrosarcoma oncogene homolog B (avian)    | Homo sapiens v-maf musculoaponeurotic fibrosarcoma oncogene homolog B (avian) (MAFB), mRNA [NM_005461]        |
| FCRL3        | A_33_P3368334 | 2.67E-02 | 8.90  | Fc receptor-like 3                                                  | Fc receptor-like 3 [Source:HGNC Symbol;Acc:18506] [ENST00000368186]                                           |
| VAMP8        | A_23_P28434   | 2.67E-02 | 3.00  | vesicle-associated membrane protein 8 (endobrevin)                  | Homo sapiens vesicle-associated membrane protein 8 (endobrevin) (VAMP8), mRNA [NM_003761]                     |
| GLT25D2      | A_24_P62505   | 2.69E-02 | 3.04  | glycosyltransferase 25 domain containing 2                          | Homo sapiens glycosyltransferase 25 domain containing 2 (GLT25D2), mRNA [NM_015101]                           |
| C5orf56      | A_33_P3388983 | 2.71E-02 | 2.02  | chromosome 5 open reading frame 56                                  | Homo sapiens cDNA: FLJ21568 fis, clone COL06492. [AK025221]                                                   |
| PCYOX1L      | A_23_P30275   | 2.72E-02 | 2.49  | prenylcysteine oxidase 1 like                                       | Homo sapiens prenylcysteine oxidase 1 like (PCYOX1L), mRNA [NM_024028]                                        |
| E2F2         | A_23_P408955  | 2.72E-02 | 4.28  | E2F transcription factor 2                                          | Homo sapiens E2F transcription factor 2 (E2F2), mRNA [NM_004091]                                              |
| ARSF         | A_23_P304304  | 2.72E-02 | -3.04 | arylsulfatase F                                                     | Homo sapiens arylsulfatase F (ARSF), transcript variant 1, mRNA [NM_004042]                                   |
| AKT1S1       | A_33_P3222451 | 2.74E-02 | 2.48  | AKT1 substrate 1 (proline-rich)                                     | AKT1 substrate 1 (proline-rich) [Source:HGNC Symbol;Acc:28426] [ENST00000391830]                              |

|           |               |          |       |                                              |                                                                                                                        |
|-----------|---------------|----------|-------|----------------------------------------------|------------------------------------------------------------------------------------------------------------------------|
| CHEK2     | A_23_P109452  | 2.74E-02 | -2.28 | checkpoint kinase 2                          | Homo sapiens CHK2 checkpoint homolog (S. pombe) (CHEK2), transcript variant 3, mRNA [NM_001005735]                     |
| MPRIIP    | A_33_P3230528 | 2.74E-02 | -2.01 | myosin phosphatase Rho interacting protein   | myosin phosphatase Rho interacting protein [Source:HGNC Symbol;Acc:30321] [ENST00000395807]                            |
| FAM21C    | A_33_P3423240 | 2.77E-02 | 3.12  | family with sequence similarity 21, member C | family with sequence similarity 21, member C [Source:HGNC Symbol;Acc:23414] [ENST00000374359]                          |
| FLJ40606  | A_33_P3303031 | 2.78E-02 | -2.03 | uncharacterized LOC643549                    | Homo sapiens hypothetical protein LOC643549, mRNA (cDNA clone IMAGE:40147028). [BC133006]                              |
| SPAG4     | A_23_P132027  | 2.78E-02 | 2.70  | sperm associated antigen 4                   | Homo sapiens sperm associated antigen 4 (SPAG4), mRNA [NM_003116]                                                      |
| LOC145837 | A_32_P46594   | 2.79E-02 | 2.80  | uncharacterized LOC145837                    | Homo sapiens uncharacterized LOC145837 (LOC145837), non-coding RNA [NR_026979]                                         |
| POSTN     | A_33_P3511265 | 2.79E-02 | 6.29  | periostin, osteoblast specific factor        | Homo sapiens periostin, osteoblast specific factor (POSTN), transcript variant 1, mRNA [NM_006475]                     |
| AKAP10    | A_23_P317105  | 2.80E-02 | 2.06  | A kinase (PRKA) anchor protein 10            | Homo sapiens A kinase (PRKA) anchor protein 10 (AKAP10), nuclear gene encoding mitochondrial protein, mRNA [NM_007202] |
| ACOXL     | A_33_P3395008 | 2.81E-02 | 5.02  | acyl-CoA oxidase-like                        | Homo sapiens acyl-CoA oxidase-like (ACOXL), mRNA [NM_001142807]                                                        |
| CMA1      | A_23_P151778  | 2.81E-02 | 2.45  | chymase 1, mast cell                         | Homo sapiens chymase 1, mast cell (CMA1), mRNA [NM_001836]                                                             |
| THY1      | A_33_P3280845 | 2.81E-02 | 6.81  | Thy-1 cell surface antigen                   | Homo sapiens Thy-1 cell surface antigen (THY1), mRNA [NM_006288]                                                       |
| C20orf103 | A_23_P40295   | 2.81E-02 | 6.34  | chromosome 20 open reading frame 103         | Homo sapiens chromosome 20 open reading frame 103 (C20orf103), transcript variant 1, mRNA [NM_012261]                  |

|                |                |          |       |                                                           |                                                                                                            |
|----------------|----------------|----------|-------|-----------------------------------------------------------|------------------------------------------------------------------------------------------------------------|
| RAB44          | A_33_P3349912  | 2.82E-02 | 2.79  | RAB44, member RAS oncogene family                         | Homo sapiens cDNA FLJ43093 fis, clone CORDB1000140. [AK125083]                                             |
| XLOC_I2_013314 | A_19_P00318390 | 2.82E-02 | -2.14 |                                                           | BROAD Institute lincRNA (XLOC_I2_013314), lincRNA [TCONS_I2_00027075]                                      |
| LOC100131831   | A_33_P3243652  | 2.84E-02 | -2.42 | uncharacterized LOC100131831                              | Homo sapiens cDNA FLJ26174 fis, clone ADG03920. [AK129685]                                                 |
| CDX1           | A_33_P3289848  | 2.84E-02 | -2.14 | caudal type homeobox 1                                    | Homo sapiens caudal type homeobox 1 (CDX1), mRNA [NM_001804]                                               |
| SLAMF1         | A_33_P3352827  | 2.85E-02 | 4.95  | signaling lymphocytic activation molecule family member 1 | Homo sapiens signaling lymphocytic activation molecule family member 1 (SLAMF1), mRNA [NM_003037]          |
| C1QB           | A_23_P137366   | 2.85E-02 | 4.05  | complement component 1, q subcomponent, B chain           | Homo sapiens complement component 1, q subcomponent, B chain (C1QB), mRNA [NM_000491]                      |
| FLJ23867       | A_33_P3220475  | 2.85E-02 | -2.93 | uncharacterized protein FLJ23867                          | Homo sapiens uncharacterized protein FLJ23867 (FLJ23867), non-coding RNA [NR_026900]                       |
| KIAA1217       | A_33_P3233580  | 2.85E-02 | -2.07 | KIAA1217                                                  | Homo sapiens cDNA FLJ43687 fis, clone TBAES2002197. [AK125675]                                             |
| ZNF441         | A_33_P3397323  | 2.85E-02 | 2.05  | zinc finger protein 441                                   | Homo sapiens zinc finger protein 441 (ZNF441), mRNA [NM_152355]                                            |
| GRM1           | A_23_P30976    | 2.85E-02 | 8.52  | glutamate receptor, metabotropic 1                        | Homo sapiens glutamate receptor, metabotropic 1 (GRM1), transcript variant 1, mRNA [NM_000838]             |
| ZNF154         | A_33_P3233754  | 2.85E-02 | -2.04 | zinc finger protein 154                                   | Homo sapiens zinc finger protein 154 (ZNF154), mRNA [NM_001085384]                                         |
| TYROBP         | A_33_P3409062  | 2.85E-02 | 3.21  | TYRO protein tyrosine kinase binding protein              | Homo sapiens TYRO protein tyrosine kinase binding protein (TYROBP), transcript variant 1, mRNA [NM_003332] |
| PDIA2          | A_23_P325642   | 2.86E-02 | 2.64  | protein disulfide isomerase family A, member 2            | Homo sapiens protein disulfide isomerase family A, member 2 (PDIA2), mRNA [NM_006849]                      |

|           |               |          |       |                                                              |                                                                                                                           |
|-----------|---------------|----------|-------|--------------------------------------------------------------|---------------------------------------------------------------------------------------------------------------------------|
| ADARB2    | A_23_P86751   | 2.86E-02 | -3.02 | adenosine deaminase, RNA-specific, B2                        | Homo sapiens adenosine deaminase, RNA-specific, B2 (ADARB2), mRNA [NM_018702]                                             |
| C11orf80  | A_23_P96165   | 2.87E-02 | 3.00  | chromosome 11 open reading frame 80                          | Homo sapiens chromosome 11 open reading frame 80 (C11orf80), mRNA [NM_024650]                                             |
| LOC113230 | A_32_P52330   | 2.87E-02 | -2.70 | uncharacterized LOC113230                                    | Homo sapiens uncharacterized LOC113230 (LOC113230), non-coding RNA [NR_024282]                                            |
| C1orf110  | A_24_P6370    | 2.87E-02 | 2.66  | chromosome 1 open reading frame 110                          | Homo sapiens chromosome 1 open reading frame 110 (C1orf110), mRNA [NM_178550]                                             |
| PTCRA     | A_33_P3229918 | 2.87E-02 | 3.13  | pre T-cell antigen receptor alpha                            | Homo sapiens pre T-cell antigen receptor alpha (PTCRA), transcript variant 1, mRNA [NM_001243168]                         |
| OR5K3     | A_33_P3419557 | 2.88E-02 | -2.46 | olfactory receptor, family 5, subfamily K, member 3          | Homo sapiens olfactory receptor, family 5, subfamily K, member 3 (OR5K3), mRNA [NM_001005516]                             |
| NAP1L3    | A_23_P125717  | 2.88E-02 | 8.66  | nucleosome assembly protein 1-like 3                         | Homo sapiens nucleosome assembly protein 1-like 3 (NAP1L3), mRNA [NM_004538]                                              |
| SAMD9L    | A_33_P3264846 | 2.88E-02 | 2.98  | sterile alpha motif domain containing 9-like                 | Homo sapiens sterile alpha motif domain containing 9-like (SAMD9L), mRNA [NM_152703]                                      |
| IL4       | A_23_P213706  | 2.90E-02 | 2.34  | interleukin 4                                                | Homo sapiens interleukin 4 (IL4), transcript variant 1, mRNA [NM_000589]                                                  |
| KIAA0895  | A_23_P305205  | 2.90E-02 | -2.28 | KIAA0895                                                     | Homo sapiens KIAA0895 (KIAA0895), transcript variant 2, mRNA [NM_015314]                                                  |
| RRP12     | A_23_P24192   | 2.91E-02 | -2.00 | ribosomal RNA processing 12 homolog ( <i>S. cerevisiae</i> ) | Homo sapiens ribosomal RNA processing 12 homolog ( <i>S. cerevisiae</i> ) (RRP12), transcript variant 1, mRNA [NM_015179] |
| A2LD1     | A_32_P110872  | 2.92E-02 | 2.17  | AIG2-like domain 1                                           | Homo sapiens AIG2-like domain 1 (A2LD1), transcript variant 1, mRNA                                                       |

|         |               |          |       |                                                                            |                                                                                                                                         |
|---------|---------------|----------|-------|----------------------------------------------------------------------------|-----------------------------------------------------------------------------------------------------------------------------------------|
| TNFSF13 | A_23_P152620  | 2.93E-02 | 2.19  | tumor necrosis factor (ligand) superfamily, member 13                      | [NM_033110]<br>Homo sapiens tumor necrosis factor (ligand) superfamily, member 13 (TNFSF13), transcript variant gamma, mRNA [NM_172088] |
| EML4    | A_24_P273413  | 2.93E-02 | 2.29  | echinoderm microtubule associated protein like 4                           | Homo sapiens echinoderm microtubule associated protein like 4 (EML4), transcript variant 1, mRNA [NM_019063]                            |
| ESPNL   | A_24_P170983  | 2.93E-02 | 5.78  | espin-like                                                                 | Homo sapiens espin-like (ESPNL), mRNA [NM_194312]                                                                                       |
| FBP1    | A_23_P257111  | 2.93E-02 | 4.41  | fructose-1,6-bisphosphatase 1                                              | Homo sapiens fructose-1,6-bisphosphatase 1 (FBP1), transcript variant 1, mRNA [NM_000507]                                               |
| FAM19A2 | A_24_P297551  | 2.93E-02 | 2.22  | family with sequence similarity 19 (chemokine (C-C motif)-like), member A2 | Homo sapiens family with sequence similarity 19 (chemokine (C-C motif)-like), member A2 (FAM19A2), mRNA [NM_178539]                     |
| RNU2-2  | A_33_P3279708 | 2.93E-02 | 2.27  | RNA, U2 small nuclear 2                                                    | Homo sapiens RNA, U2 small nuclear 2 (RNU2-2), small nuclear RNA [NR_002761]                                                            |
| GGN     | A_33_P3329984 | 2.94E-02 | -2.01 | gametogenetin                                                              | Homo sapiens gametogenetin (GGN), mRNA [NM_152657]                                                                                      |
| SH3TC1  | A_23_P41390   | 2.94E-02 | 2.65  | SH3 domain and tetratricopeptide repeats 1                                 | Homo sapiens SH3 domain and tetratricopeptide repeats 1 (SH3TC1), mRNA [NM_018986]                                                      |
| ZACN    | A_33_P3413394 | 2.95E-02 | -2.06 | zinc activated ligand-gated ion channel                                    | zinc activated ligand-gated ion channel [Source:HGNC Symbol;Acc:29504] [ENST00000392503]                                                |
| UAP1    | A_23_P160460  | 2.95E-02 | -2.11 | UDP-N-acetylglucosamine pyrophosphorylase 1                                | Homo sapiens UDP-N-acetylglucosamine pyrophosphorylase 1 (UAP1), mRNA [NM_003115]                                                       |
| UTS2D   | A_32_P225659  | 2.95E-02 | 2.53  | urotensin 2 domain containing                                              | Homo sapiens urotensin 2 domain containing (UTS2D), mRNA                                                                                |

|           |               |          |       |                                                        |                                                                                                                    |
|-----------|---------------|----------|-------|--------------------------------------------------------|--------------------------------------------------------------------------------------------------------------------|
| OCM2      | A_32_P145867  | 2.95E-02 | -3.04 | oncomodulin 2                                          | [NM_198152]<br>Homo sapiens oncomodulin 2 (OCM2), mRNA [NM_006188]                                                 |
| TNFSF8    | A_23_P169257  | 2.96E-02 | 2.66  | tumor necrosis factor (ligand) superfamily, member 8   | Homo sapiens tumor necrosis factor (ligand) superfamily, member 8 (TNFSF8), transcript variant 1, mRNA [NM_001244] |
| LOC389634 | A_33_P3243502 | 2.96E-02 | 2.37  | uncharacterized LOC389634                              | Homo sapiens uncharacterized LOC389634 (LOC389634), non-coding RNA [NR_024420]                                     |
| ALOX5AP   | A_24_P347378  | 2.96E-02 | 4.65  | arachidonate 5-lipoxygenase-activating protein         | Homo sapiens arachidonate 5-lipoxygenase-activating protein (ALOX5AP), transcript variant 1, mRNA [NM_001629]      |
| RNF126    | A_33_P3270102 | 2.96E-02 | -2.20 | ring finger protein 126                                | Homo sapiens ring finger protein 126 (RNF126), mRNA [NM_194460]                                                    |
| STK17B    | A_33_P3342957 | 2.96E-02 | 3.00  | serine/threonine kinase 17b                            | Homo sapiens serine/threonine kinase 17b (STK17B), mRNA [NM_004226]                                                |
| MGC16025  | A_23_P79572   | 2.97E-02 | 5.37  | uncharacterized LOC85009                               | Homo sapiens uncharacterized LOC85009 (MGC16025), non-coding RNA [NR_026664]                                       |
| OSBPL6    | A_33_P3255194 | 2.98E-02 | -2.61 | oxysterol binding protein-like 6                       | Homo sapiens oxysterol binding protein-like 6 (OSBPL6), transcript variant 5, mRNA [NM_001201482]                  |
| LSAMP     | A_23_P301855  | 3.00E-02 | -5.31 | limbic system-associated membrane protein              | Homo sapiens limbic system-associated membrane protein (LSAMP), mRNA [NM_002338]                                   |
| TOX       | A_24_P226755  | 3.00E-02 | 3.26  | thymocyte selection-associated high mobility group box | Homo sapiens thymocyte selection-associated high mobility group box (TOX), mRNA [NM_014729]                        |
| CIRBP     | A_23_P377616  | 3.00E-02 | 2.20  | cold inducible RNA binding protein                     | Homo sapiens cold inducible RNA binding protein (CIRBP), transcript variant 2, non-coding RNA [NR_023312]          |

|              |               |          |       |                                                |                                                                                                     |
|--------------|---------------|----------|-------|------------------------------------------------|-----------------------------------------------------------------------------------------------------|
| LOC100288069 | A_33_P3232624 | 3.00E-02 | 2.10  | general transcription factor Ili pseudogene    | Homo sapiens general transcription factor Ili pseudogene (LOC100288069), non-coding RNA [NR_033908] |
| PLEK         | A_23_P209678  | 3.01E-02 | 4.19  | pleckstrin                                     | Homo sapiens pleckstrin (PLEK), mRNA [NM_002664]                                                    |
| ALOX15B      | A_23_P60627   | 3.01E-02 | 4.06  | arachidonate 15-lipoxygenase, type B           | Homo sapiens arachidonate 15-lipoxygenase, type B (ALOX15B), transcript variant d, mRNA [NM_001141] |
| LOC284630    | A_33_P3655775 | 3.02E-02 | 2.59  | uncharacterized LOC284630                      | Homo sapiens cDNA FLJ39065 fis, clone NT2RP7014721. [AK096384]                                      |
| IGSF21       | A_32_P78101   | 3.05E-02 | 3.84  | immunoglobulin superfamily, member 21          | Homo sapiens immunoglobulin superfamily, member 21 (IGSF21), mRNA [NM_032880]                       |
| CXCR2        | A_33_P3214550 | 3.05E-02 | 2.40  | chemokine (C-X-C motif) receptor 2             | Homo sapiens chemokine (C-X-C motif) receptor 2 (CXCR2), transcript variant 1, mRNA [NM_001557]     |
| LUM          | A_23_P99063   | 3.06E-02 | 4.47  | lumican                                        | Homo sapiens lumican (LUM), mRNA [NM_002345]                                                        |
| NAV1         | A_24_P102880  | 3.06E-02 | 2.27  | neuron navigator 1                             | Homo sapiens neuron navigator 1 (NAV1), transcript variant 1, mRNA [NM_020443]                      |
| FAM83G       | A_33_P3335386 | 3.06E-02 | -3.14 | family with sequence similarity 83, member G   | family with sequence similarity 83, member G [Source:HGNC Symbol;Acc:32554] [ENST00000388995]       |
| FOXD1        | A_32_P34920   | 3.06E-02 | 5.25  | forkhead box D1                                | Homo sapiens forkhead box D1 (FOXD1), mRNA [NM_004472]                                              |
| PARP10       | A_33_P3398448 | 3.06E-02 | 2.17  | poly (ADP-ribose) polymerase family, member 10 | Homo sapiens poly (ADP-ribose) polymerase family, member 10 (PARP10), mRNA [NM_032789]              |
| RAD21-AS1    | A_33_P3276323 | 3.06E-02 | 2.17  | RAD21 antisense RNA 1 (non-protein coding)     | Homo sapiens RAD21 antisense RNA 1 (non-protein coding) (RAD21-AS1), non-coding RNA [NR_033886]     |
| LOC392196    | A_33_P3338491 | 3.08E-02 | -2.37 | ubiquitin carboxyl-terminal                    | Homo sapiens ubiquitin carboxyl-                                                                    |

|          |               |          |       |                                                        |                                                                                                                           |
|----------|---------------|----------|-------|--------------------------------------------------------|---------------------------------------------------------------------------------------------------------------------------|
|          |               |          |       | hydrolase 17-like pseudogene                           | terminal hydrolase 17-like pseudogene (LOC392196), non-coding RNA [NR_003275]                                             |
| ENO3     | A_23_P130149  | 3.09E-02 | -2.15 | enolase 3 (beta, muscle)                               | Homo sapiens enolase 3 (beta, muscle) (ENO3), transcript variant 1, mRNA [NM_001976]                                      |
| SFMBT2   | A_33_P3387455 | 3.10E-02 | 2.01  | Scm-like with four mbt domains 2                       | Homo sapiens Scm-like with four mbt domains 2 (SFMBT2), transcript variant 1, mRNA [NM_001029880]                         |
| BRCA2    | A_23_P99452   | 3.10E-02 | 2.20  | breast cancer 2, early onset                           | Homo sapiens breast cancer 2, early onset (BRCA2), mRNA [NM_000059]                                                       |
| HLA-DPA1 | A_33_P3234277 | 3.10E-02 | 3.21  | major histocompatibility complex, class II, DP alpha 1 | Homo sapiens major histocompatibility complex, class II, DP alpha 1 (HLA-DPA1), transcript variant 2, mRNA [NM_001242524] |
| SHBG     | A_33_P3353116 | 3.10E-02 | -4.11 | sex hormone-binding globulin                           | Homo sapiens sex hormone-binding globulin (SHBG), transcript variant 5, non-coding RNA [NR_027462]                        |
| MN1      | A_23_P6381    | 3.10E-02 | 2.19  | meningioma (disrupted in balanced translocation) 1     | Homo sapiens meningioma (disrupted in balanced translocation) 1 (MN1), mRNA [NM_002430]                                   |
| TMEM154  | A_23_P361584  | 3.10E-02 | 2.19  | transmembrane protein 154                              | Homo sapiens transmembrane protein 154 (TMEM154), mRNA [NM_152680]                                                        |
| GFI1B    | A_23_P216845  | 3.11E-02 | -2.30 | growth factor independent 1B transcription repressor   | Homo sapiens growth factor independent 1B transcription repressor (GFI1B), transcript variant 1, mRNA [NM_004188]         |
| KIAA1958 | A_33_P3314341 | 3.11E-02 | -2.56 | KIAA1958                                               | KIAA1958 [Source:HGNC Symbol;Acc:23427] [ENST00000374244]                                                                 |
| DMXL2    | A_23_P327361  | 3.11E-02 | 2.37  | Dmx-like 2                                             | Homo sapiens Dmx-like 2 (DMXL2), transcript variant 2, mRNA [NM_015263]                                                   |
| DOK3     | A_33_P3253144 | 3.12E-02 | 2.96  | docking protein 3                                      | Homo sapiens docking protein 3 (DOK3), transcript variant 1, mRNA [NM_024872]                                             |

|                |                |          |       |                                                    |                                                                                                                 |
|----------------|----------------|----------|-------|----------------------------------------------------|-----------------------------------------------------------------------------------------------------------------|
| HIST1H2AI      | A_33_P3360216  | 3.12E-02 | 2.88  | histone cluster 1, H2ai                            | Homo sapiens histone cluster 1, H2ai (HIST1H2AI), mRNA [NM_003509]                                              |
| LOC151657      | A_33_P3436646  | 3.13E-02 | 3.20  | uncharacterized LOC151657                          | Homo sapiens cDNA FLJ33795 fis, clone CTONG1000097. [AK091114]                                                  |
| MS4A7          | A_33_P3352098  | 3.15E-02 | 2.80  | membrane-spanning 4-domains, subfamily A, member 7 | Homo sapiens membrane-spanning 4-domains, subfamily A, member 7 (MS4A7), transcript variant 1, mRNA [NM_021201] |
| GIMAP2         | A_23_P368681   | 3.17E-02 | 2.76  | GTPase, IMAP family member 2                       | Homo sapiens GTPase, IMAP family member 2 (GIMAP2), mRNA [NM_015660]                                            |
| FCHO1          | A_33_P3255509  | 3.17E-02 | 2.46  | FCH domain only 1                                  | Homo sapiens FCH domain only 1 (FCHO1), transcript variant 1, mRNA [NM_001161357]                               |
| RASEF          | A_32_P231568   | 3.17E-02 | 2.34  | RAS and EF-hand domain containing                  | Homo sapiens RAS and EF-hand domain containing (RASEF), mRNA [NM_152573]                                        |
| XLOC_I2_003666 | A_19_P00802587 | 3.17E-02 | -3.97 |                                                    | BROAD Institute lincRNA (XLOC_I2_003666), lincRNA [TCONS_I2_00007378]                                           |
| FLT3LG         | A_23_P78742    | 3.19E-02 | 2.00  | fms-related tyrosine kinase 3 ligand               | Homo sapiens fms-related tyrosine kinase 3 ligand (FLT3LG), transcript variant 3, mRNA [NM_001459]              |
| XLOC_005365    | A_19_P00805367 | 3.19E-02 | -2.18 |                                                    | BROAD Institute lincRNA (XLOC_005365), lincRNA [TCONS_00011871]                                                 |
| PLB1           | A_23_P56356    | 3.20E-02 | 2.66  | phospholipase B1                                   | Homo sapiens phospholipase B1 (PLB1), transcript variant 1, mRNA [NM_153021]                                    |
| LOC100130348   | A_33_P3211327  | 3.20E-02 | -2.24 | uncharacterized LOC100130348                       | Uncharacterized protein [Source:UniProtKB/TrEMBL;Acc:E9PME8] [ENST00000334821]                                  |
| LOC100128402   | A_33_P3290409  | 3.20E-02 | 2.30  | uncharacterized LOC100128402                       | Homo sapiens cDNA FLJ42583 fis, clone BRACE3009090. [AK124574]                                                  |
| FAM78B         | A_33_P3244104  | 3.20E-02 | -2.66 | family with sequence similarity                    | family with sequence similarity 78,                                                                             |

|          |               |          |       |                                                |                                                                                                                        |
|----------|---------------|----------|-------|------------------------------------------------|------------------------------------------------------------------------------------------------------------------------|
|          |               |          |       | 78, member B                                   | member B [Source:HGNC Symbol;Acc:13495] [ENST00000435676]                                                              |
| HAMP     | A_33_P3336720 | 3.21E-02 | -7.02 | hepcidin antimicrobial peptide                 | Homo sapiens hepcidin antimicrobial peptide (HAMP), mRNA [NM_021175]                                                   |
| TEX21P   | A_33_P3220822 | 3.21E-02 | 2.32  | testis expressed 21, pseudogene                | Homo sapiens testis expressed 21, pseudogene (TEX21P), non-coding RNA [NR_033777]                                      |
| C9orf174 | A_32_P180315  | 3.22E-02 | 2.05  | chromosome 9 open reading frame 174            | Homo sapiens chromosome 9 open reading frame 174 (C9orf174), mRNA [NM_020893]                                          |
| NT5DC2   | A_23_P44836   | 3.22E-02 | -2.80 | 5'-nucleotidase domain containing 2            | Homo sapiens 5'-nucleotidase domain containing 2 (NT5DC2), transcript variant 2, mRNA [NM_022908]                      |
| BDNF-AS1 | A_33_P3323842 | 3.22E-02 | 2.39  | BDNF antisense RNA 1 (non-protein coding)      | Homo sapiens BDNF antisense RNA 1 (non-protein coding) (BDNF-AS1), transcript variant BT2B, non-coding RNA [NR_002832] |
| FLJ44054 | A_33_P3265314 | 3.26E-02 | -2.45 | uncharacterized LOC643365                      | Homo sapiens uncharacterized LOC643365 (FLJ44054), non-coding RNA [NR_024609]                                          |
| CORO7    | A_33_P3343295 | 3.26E-02 | 2.04  | coronin 7                                      | Homo sapiens coronin 7 (CORO7), transcript variant 1, mRNA [NM_024535]                                                 |
| TFCP2L1  | A_23_P5301    | 3.27E-02 | 2.99  | transcription factor CP2-like 1                | Homo sapiens transcription factor CP2-like 1 (TFCP2L1), mRNA [NM_014553]                                               |
| HENMT1   | A_23_P309361  | 3.27E-02 | 2.78  | HEN1 methyltransferase homolog 1 (Arabidopsis) | Homo sapiens HEN1 methyltransferase homolog 1 (Arabidopsis) (HENMT1), transcript variant 1, mRNA [NM_144584]           |
| DGKD     | A_23_P210253  | 3.27E-02 | -2.25 | diacylglycerol kinase, delta 130kDa            | Homo sapiens diacylglycerol kinase, delta 130kDa (DGKD), transcript variant 2, mRNA [NM_152879]                        |
| COX5A    | A_32_P98502   | 3.27E-02 | -2.10 | cytochrome c oxidase subunit Va                | Homo sapiens cytochrome c oxidase subunit Va (COX5A), nuclear gene encoding mitochondrial protein, mRNA                |

|             |                |          |       |                                                                          |                                                                                                                                        |
|-------------|----------------|----------|-------|--------------------------------------------------------------------------|----------------------------------------------------------------------------------------------------------------------------------------|
| CHST1       | A_23_P98205    | 3.27E-02 | -2.22 | carbohydrate (keratan sulfate Gal-6) sulfotransferase 1                  | [NM_004255]<br>Homo sapiens carbohydrate (keratan sulfate Gal-6) sulfotransferase 1 (CHST1), mRNA [NM_003654]                          |
| MTMR11      | A_33_P3393927  | 3.27E-02 | 2.08  | myotubularin related protein 11                                          | Homo sapiens myotubularin related protein 11 (MTMR11), transcript variant 2, mRNA [NM_181873]                                          |
| FGR         | A_23_P103932   | 3.28E-02 | 2.85  | Gardner-Rasheed feline sarcoma viral (v-fgr) oncogene homolog            | Homo sapiens Gardner-Rasheed feline sarcoma viral (v-fgr) oncogene homolog (FGR), transcript variant 2, mRNA [NM_001042747]            |
| WDR62       | A_33_P3254606  | 3.29E-02 | -2.96 | WD repeat domain 62                                                      | Homo sapiens WD repeat domain 62 (WDR62), transcript variant 1, mRNA [NM_001083961]                                                    |
| BCL2L11     | A_24_P122921   | 3.29E-02 | 2.36  | BCL2-like 11 (apoptosis facilitator)                                     | Homo sapiens BCL2-like 11 (apoptosis facilitator) (BCL2L11), transcript variant 1, mRNA [NM_138621]                                    |
| PDCD1LG2    | A_33_P3213707  | 3.30E-02 | 2.71  | programmed cell death 1 ligand 2                                         | Homo sapiens programmed cell death 1 ligand 2 (PDCD1LG2), mRNA [NM_025239]                                                             |
| BFSP2       | A_23_P159316   | 3.32E-02 | 2.83  | beaded filament structural protein 2, phakinin                           | Homo sapiens beaded filament structural protein 2, phakinin (BFSP2), mRNA [NM_003571]                                                  |
| SPOCK2      | A_33_P3214948  | 3.34E-02 | 2.47  | sparc/osteonectin, cwcv and kazal-like domains proteoglycan (testican) 2 | Homo sapiens sparc/osteonectin, cwcv and kazal-like domains proteoglycan (testican) 2 (SPOCK2), transcript variant 2, mRNA [NM_014767] |
| TUBB2A      | A_33_P3365002  | 3.34E-02 | -2.06 | tubulin, beta 2A class IIa                                               | Homo sapiens tubulin, beta 2A class IIa (TUBB2A), mRNA [NM_001069]                                                                     |
| XLOC_002275 | A_19_P00802420 | 3.34E-02 | 2.47  |                                                                          | BROAD Institute lincRNA (XLOC_002275), lincRNA [TCONS_00004391]                                                                        |
| EREG        | A_23_P41344    | 3.36E-02 | -5.66 | epiregulin                                                               | Homo sapiens epiregulin (EREG), mRNA                                                                                                   |

|         |               |          |       |                                                                                           |                                                                                                                                  |
|---------|---------------|----------|-------|-------------------------------------------------------------------------------------------|----------------------------------------------------------------------------------------------------------------------------------|
| P2RY13  | A_24_P63136   | 3.36E-02 | 3.60  | purinergic receptor P2Y, G-protein coupled, 13                                            | [NM_001432]<br>Homo sapiens purinergic receptor P2Y, G-protein coupled, 13 (P2RY13), mRNA [NM_176894]                            |
| TMEM119 | A_33_P3395605 | 3.38E-02 | 3.89  | transmembrane protein 119                                                                 | Homo sapiens transmembrane protein 119 (TMEM119), mRNA [NM_181724]                                                               |
| UTY     | A_23_P329835  | 3.38E-02 | -4.64 | ubiquitously transcribed tetratricopeptide repeat gene, Y-linked                          | Homo sapiens ubiquitously transcribed tetratricopeptide repeat gene, Y-linked (UTY), transcript variant 3, mRNA [NM_007125]      |
| TRANK1  | A_24_P68079   | 3.39E-02 | 3.12  | tetratricopeptide repeat and ankyrin repeat containing 1                                  | Homo sapiens tetratricopeptide repeat and ankyrin repeat containing 1 (TRANK1), mRNA [NM_014831]                                 |
| PPP6R2  | A_33_P3397768 | 3.40E-02 | 2.41  | protein phosphatase 6, regulatory subunit 2                                               | Homo sapiens cDNA FLJ14086 fis, clone MAMMA1000143. [AK024148]                                                                   |
| APOBR   | A_23_P54770   | 3.40E-02 | 4.23  | apolipoprotein B receptor                                                                 | Homo sapiens apolipoprotein B receptor (APOBR), mRNA [NM_018690]                                                                 |
| KCNN4   | A_23_P67529   | 3.41E-02 | 3.79  | potassium intermediate/small conductance calcium-activated channel, subfamily N, member 4 | Homo sapiens potassium intermediate/small conductance calcium-activated channel, subfamily N, member 4 (KCNN4), mRNA [NM_002250] |
| ANKAR   | A_23_P370544  | 3.42E-02 | 2.40  | ankyrin and armadillo repeat containing                                                   | Homo sapiens ankyrin and armadillo repeat containing (ANKAR), mRNA [NM_144708]                                                   |
| MERTK   | A_33_P3402086 | 3.42E-02 | 3.59  | c-mer proto-oncogene tyrosine kinase                                                      | c-mer proto-oncogene tyrosine kinase [Source:HGNC Symbol;Acc:7027] [ENST00000393237]                                             |
| PRSS57  | A_33_P3298775 | 3.42E-02 | 2.76  | protease, serine, 57                                                                      | Homo sapiens protease, serine, 57 (PRSS57), mRNA [NM_214710]                                                                     |
| PYDC1   | A_23_P407614  | 3.42E-02 | 2.38  | PYD (pyrin domain) containing 1                                                           | Homo sapiens PYD (pyrin domain) containing 1 (PYDC1), mRNA [NM_152901]                                                           |

|             |                |          |       |                                                                      |                                                                                                                                 |
|-------------|----------------|----------|-------|----------------------------------------------------------------------|---------------------------------------------------------------------------------------------------------------------------------|
| DBNDD2      | A_23_P28772    | 3.43E-02 | -2.30 | dysbindin (dystrobrevin binding protein 1) domain containing 2       | Homo sapiens dysbindin (dystrobrevin binding protein 1) domain containing 2 (DBNDD2), transcript variant 6, mRNA [NM_001048226] |
| GPD1        | A_23_P204736   | 3.45E-02 | -3.03 | glycerol-3-phosphate dehydrogenase 1 (soluble)                       | Homo sapiens glycerol-3-phosphate dehydrogenase 1 (soluble) (GPD1), mRNA [NM_005276]                                            |
| CYP4F30P    | A_24_P28811    | 3.45E-02 | -2.63 | cytochrome P450, family 4, subfamily F, polypeptide 30, pseudogene   | Homo sapiens cytochrome P450, family 4, subfamily F, polypeptide 30, pseudogene (CYP4F30P), non-coding RNA [NR_023391]          |
| SYT17       | A_23_P163697   | 3.45E-02 | 2.42  | synaptotagmin XVII                                                   | Homo sapiens synaptotagmin XVII (SYT17), mRNA [NM_016524]                                                                       |
| ZNF287      | A_23_P4416     | 3.46E-02 | 3.32  | zinc finger protein 287                                              | Homo sapiens zinc finger protein 287 (ZNF287), mRNA [NM_020653]                                                                 |
| TRIM66      | A_33_P3390773  | 3.48E-02 | 3.11  | tripartite motif containing 66                                       | Homo sapiens tripartite motif containing 66 (TRIM66), mRNA [NM_014818]                                                          |
| C7orf54     | A_24_P389285   | 3.49E-02 | -2.37 | chromosome 7 open reading frame 54                                   | Homo sapiens chromosome 7 open reading frame 54 (C7orf54), non-coding RNA [NR_027330]                                           |
| SGK110      | A_33_P3237744  | 3.49E-02 | -3.04 | putative uncharacterized serine/threonine-protein kinase SgK110-like | Homo sapiens putative uncharacterized serine/threonine-protein kinase SgK110-like (SGK110), mRNA [NM_001199824]                 |
| C8G         | A_33_P3319006  | 3.52E-02 | -2.81 | complement component 8, gamma polypeptide                            | Homo sapiens complement component 8, gamma polypeptide (C8G), mRNA [NM_000606]                                                  |
| NR4A3       | A_23_P398566   | 3.52E-02 | -8.61 | nuclear receptor subfamily 4, group A, member 3                      | Homo sapiens nuclear receptor subfamily 4, group A, member 3 (NR4A3), transcript variant 3, mRNA [NM_173200]                    |
| XLOC_005342 | A_19_P00317974 | 3.52E-02 | -3.27 |                                                                      | BROAD Institute lincRNA (XLOC_005342), lincRNA [TCONS_00011323]                                                                 |

|             |                |          |       |                                                                    |                                                                                                              |
|-------------|----------------|----------|-------|--------------------------------------------------------------------|--------------------------------------------------------------------------------------------------------------|
| C21orf7     | A_33_P3238305  | 3.53E-02 | 4.82  | chromosome 21 open reading frame 7                                 | chromosome 21 open reading frame 7 [Source:HGNC Symbol;Acc:16457] [ENST00000399926]                          |
| APOBEC2     | A_23_P70387    | 3.53E-02 | -2.01 | apolipoprotein B mRNA editing enzyme, catalytic polypeptide-like 2 | Homo sapiens apolipoprotein B mRNA editing enzyme, catalytic polypeptide-like 2 (APOBEC2), mRNA [NM_006789]  |
| Q6IHG2      | A_19_P00317023 | 3.55E-02 | 4.63  |                                                                    | Q6IHG2_DROME (Q6IHG2) HDC02633, partial (8%) [THC2534303]                                                    |
| ABRA        | A_33_P3368208  | 3.55E-02 | -4.34 | actin-binding Rho activating protein                               | Homo sapiens actin-binding Rho activating protein (ABRA), mRNA [NM_139166]                                   |
| SCG5        | A_23_P62081    | 3.55E-02 | 2.85  | secretogranin V (7B2 protein)                                      | Homo sapiens secretogranin V (7B2 protein) (SCG5), transcript variant 2, mRNA [NM_003020]                    |
| MFSD4       | A_23_P365412   | 3.55E-02 | 2.39  | major facilitator superfamily domain containing 4                  | Homo sapiens major facilitator superfamily domain containing 4 (MFSD4), mRNA [NM_181644]                     |
| XLOC_005730 | A_19_P00321670 | 3.56E-02 | -2.65 |                                                                    | zt85h04.r1 Soares_testis_NHT Homo sapiens cDNA clone IMAGE:729175 5', mRNA sequence [AA397666]               |
| FAM176A     | A_23_P108673   | 3.56E-02 | -3.49 | family with sequence similarity 176, member A                      | Homo sapiens family with sequence similarity 176, member A (FAM176A), transcript variant 2, mRNA [NM_032181] |
| EDA2R       | A_33_P3413468  | 3.57E-02 | 3.42  | ectodysplasin A2 receptor                                          | Homo sapiens ectodysplasin A2 receptor (EDA2R), transcript variant 3, mRNA [NM_001242310]                    |
| ERI2        | A_23_P129717   | 3.57E-02 | 2.07  | ERI1 exoribonuclease family member 2                               | Homo sapiens ERI1 exoribonuclease family member 2 (ERI2), transcript variant 2, mRNA [NM_080663]             |
| VNN1        | A_33_P3399571  | 3.60E-02 | 4.33  | vanin 1                                                            | Homo sapiens vanin 1 (VNN1), mRNA [NM_004666]                                                                |
| TFF1        | A_24_P322771   | 3.60E-02 | -2.13 | trefoil factor 1                                                   | Homo sapiens trefoil factor 1 (TFF1), mRNA [NM_003225]                                                       |

|          |                |          |       |                                                                                        |                                                                                                                              |
|----------|----------------|----------|-------|----------------------------------------------------------------------------------------|------------------------------------------------------------------------------------------------------------------------------|
| CXCL16   | A_33_P3351249  | 3.62E-02 | 3.05  | chemokine (C-X-C motif) ligand 16                                                      | Homo sapiens chemokine (C-X-C motif) ligand 16 (CXCL16), transcript variant 2, mRNA [NM_001100812]                           |
| DNALI1   | A_33_P3289227  | 3.62E-02 | 2.12  | dynein, axonemal, light intermediate chain 1                                           | Homo sapiens dynein, axonemal, light intermediate chain 1 (DNALI1), mRNA [NM_003462]                                         |
| RPGRIP1  | A_23_P88278    | 3.62E-02 | 2.98  | retinitis pigmentosa GTPase regulator interacting protein 1                            | Homo sapiens retinitis pigmentosa GTPase regulator interacting protein 1 (RPGRIP1), mRNA [NM_020366]                         |
| MMP9     | A_23_P40174    | 3.63E-02 | 7.26  | matrix metalloproteinase 9 (gelatinase B, 92kDa gelatinase, 92kDa type IV collagenase) | Homo sapiens matrix metalloproteinase 9 (gelatinase B, 92kDa gelatinase, 92kDa type IV collagenase) (MMP9), mRNA [NM_004994] |
| MIR155HG | A_32_P108156   | 3.63E-02 | 3.40  | MIR155 host gene (non-protein coding)                                                  | Homo sapiens MIR155 host gene (non-protein coding) (MIR155HG), non-coding RNA [NR_001458]                                    |
| Q3T5P7   | A_19_P00318803 | 3.64E-02 | 2.16  |                                                                                        | Q3T5P7_HORVD (Q3T5P7) HvCBF5, partial (10%) [THC2521292]                                                                     |
| VSIG4    | A_23_P217269   | 3.64E-02 | 2.67  | V-set and immunoglobulin domain containing 4                                           | Homo sapiens V-set and immunoglobulin domain containing 4 (VSIG4), transcript variant 1, mRNA [NM_007268]                    |
| OLFML2B  | A_33_P3401243  | 3.64E-02 | 2.09  | olfactomedin-like 2B                                                                   | Homo sapiens olfactomedin-like 2B (OLFML2B), mRNA [NM_015441]                                                                |
| SIRPD    | A_33_P3244610  | 3.64E-02 | 2.48  | signal-regulatory protein delta                                                        | Homo sapiens signal-regulatory protein delta (SIRPD), mRNA [NM_178460]                                                       |
| STIM2    | A_24_P180242   | 3.64E-02 | 2.03  | stromal interaction molecule 2                                                         | Homo sapiens stromal interaction molecule 2 (STIM2), transcript variant 2, mRNA [NM_020860]                                  |
| MB21D1   | A_32_P1173     | 3.65E-02 | 2.18  | Mab-21 domain containing 1                                                             | Homo sapiens Mab-21 domain containing 1 (MB21D1), mRNA [NM_138441]                                                           |
| NANP     | A_33_P3406458  | 3.66E-02 | -2.41 | N-acetylneuraminic acid                                                                | Homo sapiens N-acetylneuraminic acid                                                                                         |

|                |                |          |       |                                                                |                                                                                                                                  |
|----------------|----------------|----------|-------|----------------------------------------------------------------|----------------------------------------------------------------------------------------------------------------------------------|
| C1QTNF1        | A_23_P3956     | 3.66E-02 | -2.90 | phosphatase<br>C1q and tumor necrosis factor related protein 1 | phosphatase (NANP), mRNA [NM_152667]<br>Homo sapiens C1q and tumor necrosis factor related protein 1 (C1QTNF1), mRNA [NM_198594] |
| HLA-DMB        | A_32_P351968   | 3.67E-02 | 3.38  | major histocompatibility complex, class II, DM beta            | Homo sapiens major histocompatibility complex, class II, DM beta (HLA-DMB), mRNA [NM_002118]                                     |
| GGTLC1         | A_23_P57199    | 3.68E-02 | 2.32  | gamma-glutamyltransferase light chain 1                        | Homo sapiens gamma-glutamyltransferase light chain 1 (GGTLC1), transcript variant A, mRNA [NM_178311]                            |
| LAPTM5         | A_23_P86283    | 3.69E-02 | 4.08  | lysosomal protein transmembrane 5                              | Homo sapiens lysosomal protein transmembrane 5 (LAPTM5), mRNA [NM_006762]                                                        |
| MT1F           | A_23_P15174    | 3.70E-02 | 2.84  | metallothionein 1F                                             | Homo sapiens metallothionein 1F (MT1F), mRNA [NM_005949]                                                                         |
| MLXIPL         | A_23_P145786   | 3.71E-02 | -5.15 | MLX interacting protein-like                                   | Homo sapiens MLX interacting protein-like (MLXIPL), transcript variant 1, mRNA [NM_032951]                                       |
| SUSD4          | A_23_P201066   | 3.72E-02 | -4.58 | sushi domain containing 4                                      | Homo sapiens sushi domain containing 4 (SUSD4), transcript variant 2, mRNA [NM_001037175]                                        |
| XLOC_I2_009639 | A_19_P00321549 | 3.73E-02 | 2.93  |                                                                | BROAD Institute lincRNA (XLOC_I2_009639), lincRNA [TCONS_I2_00019763]                                                            |
| ZNF624         | A_23_P153037   | 3.73E-02 | 2.19  | zinc finger protein 624                                        | Homo sapiens zinc finger protein 624 (ZNF624), mRNA [NM_020787]                                                                  |
| N4BP2L1        | A_33_P3245415  | 3.73E-02 | 2.06  | NEDD4 binding protein 2-like 1                                 | Homo sapiens NEDD4 binding protein 2-like 1 (N4BP2L1), transcript variant 1, mRNA [NM_052818]                                    |
| BOD1P          | A_33_P3503279  | 3.75E-02 | -3.11 | biorientation of chromosomes in cell division 1 pseudogene     | AGENCOURT_6565391 NIH_MGC_119<br>Homo sapiens cDNA clone                                                                         |

|              |               |          |       |                                                                                  |                                                                                                                                                                                            |
|--------------|---------------|----------|-------|----------------------------------------------------------------------------------|--------------------------------------------------------------------------------------------------------------------------------------------------------------------------------------------|
| ACCS         | A_23_P24586   | 3.75E-02 | 2.03  | 1-aminocyclopropane-1-carboxylate synthase homolog (Arabidopsis)(non-functional) | IMAGE:5744262 5', mRNA sequence [BM559531]<br>Homo sapiens 1-aminocyclopropane-1-carboxylate synthase homolog (Arabidopsis)(non-functional) (ACCS), transcript variant 1, mRNA [NM_032592] |
| EFHC1        | A_32_P86245   | 3.79E-02 | 2.57  | EF-hand domain (C-terminal) containing 1                                         | Homo sapiens EF-hand domain (C-terminal) containing 1 (EFHC1), transcript variant A, mRNA [NM_018100]                                                                                      |
| LOC100132339 | A_33_P3242075 | 3.79E-02 | -2.10 | uncharacterized LOC100132339                                                     | PREDICTED: Homo sapiens hypothetical protein LOC100132339 (LOC100132339), mRNA [XM_001716934]                                                                                              |
| CCNG2        | A_24_P80532   | 3.80E-02 | 2.91  | cyclin G2                                                                        | Homo sapiens cyclin G2 (CCNG2), mRNA [NM_004354]                                                                                                                                           |
| LOC100240735 | A_32_P170481  | 3.81E-02 | 2.71  | uncharacterized LOC100240735                                                     | Homo sapiens uncharacterized LOC100240735 (LOC100240735), non-coding RNA [NR_026658]                                                                                                       |
| O3FAR1       | A_24_P129588  | 3.81E-02 | -4.02 | omega-3 fatty acid receptor 1                                                    | Homo sapiens omega-3 fatty acid receptor 1 (O3FAR1), transcript variant 1, mRNA [NM_181745]                                                                                                |
| LRRC25       | A_23_P165136  | 3.81E-02 | 3.33  | leucine rich repeat containing 25                                                | Homo sapiens leucine rich repeat containing 25 (LRRC25), mRNA [NM_145256]                                                                                                                  |
| TCEANC       | A_33_P3400057 | 3.81E-02 | 3.29  | transcription elongation factor A (SII) N-terminal and central domain containing | Homo sapiens transcription elongation factor A (SII) N-terminal and central domain containing (TCEANC), mRNA [NM_152634]                                                                   |
| SH3BP5       | A_24_P148750  | 3.81E-02 | 2.16  | SH3-domain binding protein 5 (BTK-associated)                                    | Homo sapiens SH3-domain binding protein 5 (BTK-associated) (SH3BP5), transcript variant 1, mRNA [NM_004844]                                                                                |
| GSDMB        | A_33_P3221999 | 3.82E-02 | 2.54  | gasdermin B                                                                      | Homo sapiens gasdermin B (GSDMB), transcript variant 3, mRNA                                                                                                                               |

|            |               |          |       |                                                                                |                                                                                                                                              |
|------------|---------------|----------|-------|--------------------------------------------------------------------------------|----------------------------------------------------------------------------------------------------------------------------------------------|
| CNOT6L     | A_33_P3277943 | 3.85E-02 | 2.13  | CCR4-NOT transcription complex, subunit 6-like                                 | [NM_001165958]<br>Homo sapiens CCR4-NOT transcription complex, subunit 6-like (CNOT6L), mRNA [NM_144571]                                     |
| MYRIP      | A_23_P326760  | 3.85E-02 | 3.10  | myosin VIIA and Rab interacting protein                                        | Homo sapiens myosin VIIA and Rab interacting protein (MYRIP), mRNA [NM_015460]                                                               |
| GLIS2      | A_33_P3333224 | 3.85E-02 | -2.16 | GLIS family zinc finger 2                                                      | Homo sapiens GLIS family zinc finger 2 (GLIS2), mRNA [NM_032575]                                                                             |
| CHST15     | A_23_P383986  | 3.86E-02 | 2.32  | carbohydrate (N-acetylgalactosamine 4-sulfate 6-O) sulfotransferase 15         | Homo sapiens carbohydrate (N-acetylgalactosamine 4-sulfate 6-O) sulfotransferase 15 (CHST15), transcript variant 1, mRNA [NM_015892]         |
| LINC00204B | A_33_P3371402 | 3.86E-02 | 2.14  | long intergenic non-protein coding RNA 204B                                    | Homo sapiens long intergenic non-protein coding RNA 204B (LINC00204B), non-coding RNA [NR_027402]                                            |
| HLA-DQB2   | A_23_P19510   | 3.87E-02 | 3.56  | major histocompatibility complex, class II, DQ beta 2                          | Homo sapiens major histocompatibility complex, class II, DQ beta 2 (HLA-DQB2), mRNA [NM_001198858]                                           |
| TESC       | A_23_P76538   | 3.90E-02 | -2.28 | tescalcin                                                                      | Homo sapiens tescalcin (TESC), transcript variant 1, mRNA [NM_017899]                                                                        |
| IDO2       | A_24_P12690   | 3.90E-02 | 4.82  | indoleamine 2,3-dioxygenase 2                                                  | Homo sapiens indoleamine 2,3-dioxygenase 2 (IDO2), mRNA [NM_194294]                                                                          |
| LILRA2     | A_23_P142205  | 3.91E-02 | 3.12  | leukocyte immunoglobulin-like receptor, subfamily A (with TM domain), member 2 | Homo sapiens leukocyte immunoglobulin-like receptor, subfamily A (with TM domain), member 2 (LILRA2), transcript variant 2, mRNA [NM_006866] |
| DNASE1L3   | A_33_P3234202 | 3.91E-02 | 4.13  | deoxyribonuclease I-like 3                                                     | Homo sapiens deoxyribonuclease I-like 3 (DNASE1L3), mRNA [NM_004944]                                                                         |
| SYNGAP1    | A_24_P9346    | 3.91E-02 | 2.56  | synaptic Ras GTPase activating protein 1                                       | Homo sapiens synaptic Ras GTPase activating protein 1 (SYNGAP1), mRNA [NM_006772]                                                            |

|           |                |          |       |                                                                                          |                                                                                                                                                        |
|-----------|----------------|----------|-------|------------------------------------------------------------------------------------------|--------------------------------------------------------------------------------------------------------------------------------------------------------|
| COL4A4    | A_33_P3227400  | 3.91E-02 | 2.39  | collagen, type IV, alpha 4                                                               | Homo sapiens collagen, type IV, alpha 4 (COL4A4), mRNA [NM_000092]                                                                                     |
| GUSBP11   | A_19_P00812151 | 3.91E-02 | 2.01  |                                                                                          | Homo sapiens glucuronidase, beta pseudogene 11 (GUSBP11), non-coding RNA [NR_024448]                                                                   |
| STAG3     | A_33_P3317058  | 3.91E-02 | 2.86  | stromal antigen 3                                                                        | Homo sapiens stromal antigen 3 (STAG3), mRNA [NM_012447]                                                                                               |
| EMX1      | A_33_P3343715  | 3.92E-02 | -2.33 | empty spiracles homeobox 1                                                               | Homo sapiens empty spiracles homeobox 1, mRNA (cDNA clone IMAGE:5198260), complete cds. [BC037242]                                                     |
| SLC10A2   | A_23_P140009   | 3.92E-02 | 2.08  | solute carrier family 10 (sodium/bile acid cotransporter family), member 2               | Homo sapiens solute carrier family 10 (sodium/bile acid cotransporter family), member 2 (SLC10A2), mRNA [NM_000452]                                    |
| PIM1      | A_23_P345118   | 3.92E-02 | -2.72 | pim-1 oncogene                                                                           | Homo sapiens pim-1 oncogene (PIM1), transcript variant 1, mRNA [NM_002648]                                                                             |
| FKBP4     | A_23_P128372   | 3.93E-02 | -2.13 | FK506 binding protein 4, 59kDa                                                           | Homo sapiens FK506 binding protein 4, 59kDa (FKBP4), mRNA [NM_002014]                                                                                  |
| LILRB2    | A_23_P208493   | 3.93E-02 | 3.70  | leukocyte immunoglobulin-like receptor, subfamily B (with TM and ITIM domains), member 2 | Homo sapiens leukocyte immunoglobulin-like receptor, subfamily B (with TM and ITIM domains), member 2 (LILRB2), transcript variant 1, mRNA [NM_005874] |
| H1FNT     | A_32_P202859   | 3.94E-02 | -2.56 | H1 histone family, member N, testis-specific                                             | Homo sapiens H1 histone family, member N, testis-specific (H1FNT), mRNA [NM_181788]                                                                    |
| C10orf108 | A_33_P3322949  | 3.94E-02 | -4.45 | chromosome 10 open reading frame 108                                                     | Homo sapiens chromosome 10 open reading frame 108 (C10orf108), transcript variant 2, non-coding RNA [NR_027151]                                        |
| KCNG1     | A_23_P210581   | 3.94E-02 | -4.03 | potassium voltage-gated channel, subfamily G, member 1                                   | Homo sapiens potassium voltage-gated channel, subfamily G, member 1                                                                                    |

|              |                |          |       |                                                |                                                                                                          |
|--------------|----------------|----------|-------|------------------------------------------------|----------------------------------------------------------------------------------------------------------|
| KIAA1598     | A_33_P3419139  | 3.98E-02 | 2.31  | KIAA1598                                       | (KCNQ1), mRNA [NM_002237]<br>Homo sapiens KIAA1598 (KIAA1598), transcript variant 1, mRNA [NM_001127211] |
| PYY2         | A_33_P3257866  | 3.98E-02 | -2.27 | peptide YY, 2 (seminalplasmin)                 | Homo sapiens peptide YY, 2 (seminalplasmin) (PYY2), non-coding RNA [NR_003064]                           |
| DPRXP4       | A_33_P3306048  | 3.99E-02 | 2.05  | divergent-paired related homeobox pseudogene 4 | Homo sapiens divergent-paired related homeobox pseudogene 4 (DPRXP4), non-coding RNA [NR_002221]         |
| CATSPER2     | A_24_P181422   | 4.00E-02 | 2.07  | cation channel, sperm associated 2             | Homo sapiens cation channel, sperm associated 2 (CATSPER2), transcript variant 4, mRNA [NM_172097]       |
| LOC100129461 | A_33_P3349591  | 4.00E-02 | -2.47 | uncharacterized LOC100129461                   | Homo sapiens cDNA clone IMAGE:40108878. [BC133670]                                                       |
| PTK6         | A_23_P56978    | 4.00E-02 | 2.18  | PTK6 protein tyrosine kinase 6                 | Homo sapiens PTK6 protein tyrosine kinase 6 (PTK6), mRNA [NM_005975]                                     |
| NFE2L3       | A_23_P42718    | 4.00E-02 | 2.44  | nuclear factor (erythroid-derived 2)-like 3    | Homo sapiens nuclear factor (erythroid-derived 2)-like 3 (NFE2L3), mRNA [NM_004289]                      |
| PLVAP        | A_23_P56328    | 4.00E-02 | 3.59  | plasmalemma vesicle associated protein         | Homo sapiens plasmalemma vesicle associated protein (PLVAP), mRNA [NM_031310]                            |
| ZNF596       | A_23_P82762    | 4.01E-02 | 2.33  | zinc finger protein 596                        | Homo sapiens zinc finger protein 596 (ZNF596), transcript variant 1, mRNA [NM_001042416]                 |
| XLOC_006829  | A_19_P00809915 | 4.01E-02 | -6.30 |                                                | BROAD Institute lincRNA (XLOC_006829), lincRNA [TCONS_00014745]                                          |
| RNF6         | A_24_P144881   | 4.01E-02 | -2.33 | ring finger protein (C3H2C3 type) 6            | Homo sapiens ring finger protein (C3H2C3 type) 6 (RNF6), transcript variant 1, mRNA [NM_005977]          |
| MUC12        | A_24_P658413   | 4.02E-02 | 2.17  | mucin 12, cell surface associated              | Homo sapiens mucin 12, cell surface                                                                      |

|         |               |          |       |                                                                     |                                                                                                                                                          |
|---------|---------------|----------|-------|---------------------------------------------------------------------|----------------------------------------------------------------------------------------------------------------------------------------------------------|
| MGC4294 | A_23_P102681  | 4.02E-02 | 3.15  | uncharacterized MGC4294                                             | associated (MUC12), mRNA [NM_001164462]<br>PREDICTED: Homo sapiens hypothetical MGC4294 (MGC4294), miscRNA [XR_109628]                                   |
| EPB41   | A_33_P3227842 | 4.02E-02 | 2.39  | erythrocyte membrane protein band 4.1 (elliptocytosis 1, RH-linked) | Homo sapiens erythrocyte membrane protein band 4.1 (elliptocytosis 1, RH-linked) (EPB41), transcript variant 3, mRNA [NM_001166006]                      |
| CDYL2   | A_23_P371865  | 4.02E-02 | 2.56  | chromodomain protein, Y-like 2                                      | Homo sapiens chromodomain protein, Y-like 2 (CDYL2), mRNA [NM_152342]                                                                                    |
| CFHR3   | A_23_P103256  | 4.03E-02 | 2.98  | complement factor H-related 3                                       | Homo sapiens complement factor H-related 3 (CFHR3), transcript variant 1, mRNA [NM_021023]                                                               |
| PPP1R32 | A_23_P98571   | 4.03E-02 | 2.29  | protein phosphatase 1, regulatory subunit 32                        | Homo sapiens protein phosphatase 1, regulatory subunit 32 (PPP1R32), nuclear gene encoding mitochondrial protein, transcript variant 1, mRNA [NM_145017] |
| C2orf43 | A_33_P3210516 | 4.05E-02 | 2.42  | chromosome 2 open reading frame 43                                  | chromosome 2 open reading frame 43 [Source:HGNC Symbol;Acc:26145] [ENST00000419825]                                                                      |
| SNORD17 | A_33_P3263379 | 4.07E-02 | 2.15  | small nucleolar RNA, C/D box 17                                     | Homo sapiens small nucleolar RNA, C/D box 17 (SNORD17), small nucleolar RNA [NR_003045]                                                                  |
| PIK3R1  | A_24_P29401   | 4.08E-02 | 2.67  | phosphoinositide-3-kinase, regulatory subunit 1 (alpha)             | Homo sapiens phosphoinositide-3-kinase, regulatory subunit 1 (alpha) (PIK3R1), transcript variant 1, mRNA [NM_181523]                                    |
| C9orf68 | A_23_P157766  | 4.09E-02 | 2.56  | chromosome 9 open reading frame 68                                  | Homo sapiens chromosome 9 open reading frame 68 (C9orf68), mRNA [NM_001039395]                                                                           |
| CRY1    | A_24_P407235  | 4.10E-02 | -2.09 | cryptochrome 1 (photolyase-like)                                    | Homo sapiens cryptochrome 1 (photolyase-like) (CRY1), mRNA                                                                                               |

|           |               |          |       |                                                                                  |                                                                                                                                                    |
|-----------|---------------|----------|-------|----------------------------------------------------------------------------------|----------------------------------------------------------------------------------------------------------------------------------------------------|
| ECM2      | A_23_P303671  | 4.10E-02 | 3.00  | extracellular matrix protein 2, female organ and adipocyte specific              | [NM_004075]<br>Homo sapiens extracellular matrix protein 2, female organ and adipocyte specific (ECM2), transcript variant 1, mRNA [NM_001393]     |
| MDK       | A_23_P116235  | 4.11E-02 | 2.35  | midkine (neurite growth-promoting factor 2)                                      | Homo sapiens midkine (neurite growth-promoting factor 2) (MDK), transcript variant 1, mRNA [NM_001012334]                                          |
| LOC729175 | A_33_P3214072 | 4.11E-02 | -3.35 | uncharacterized LOC729175                                                        | PREDICTED: Homo sapiens hypothetical protein LOC729175 (LOC729175), mRNA [XM_001129558]                                                            |
| C1QTNF6   | A_33_P3269428 | 4.12E-02 | -2.65 | C1q and tumor necrosis factor related protein 6                                  | C1q and tumor necrosis factor related protein 6 [Source:HGNC Symbol;Acc:14343] [ENST00000255836]                                                   |
| CD300C    | A_23_P26771   | 4.12E-02 | 2.62  | CD300c molecule                                                                  | Homo sapiens CD300c molecule (CD300C), mRNA [NM_006678]                                                                                            |
| HMX1      | A_33_P3328450 | 4.12E-02 | -2.75 | H6 family homeobox 1                                                             | Homo sapiens H6 family homeobox 1 (HMX1), mRNA [NM_018942]                                                                                         |
| GDF10     | A_23_P52227   | 4.13E-02 | 5.26  | growth differentiation factor 10                                                 | Homo sapiens growth differentiation factor 10 (GDF10), mRNA [NM_004962]                                                                            |
| TFEC      | A_32_P184394  | 4.13E-02 | 4.40  | transcription factor EC                                                          | Homo sapiens transcription factor EC (TFEC), transcript variant 1, mRNA [NM_012252]                                                                |
| JAK3      | A_24_P59667   | 4.13E-02 | 4.05  | Janus kinase 3                                                                   | Homo sapiens Janus kinase 3 (JAK3), mRNA [NM_000215]                                                                                               |
| CEACAM1   | A_33_P3268507 | 4.13E-02 | -2.43 | carcinoembryonic antigen-related cell adhesion molecule 1 (biliary glycoprotein) | Homo sapiens carcinoembryonic antigen-related cell adhesion molecule 1 (biliary glycoprotein) (CEACAM1), transcript variant 5, mRNA [NM_001184816] |
| FLJ45513  | A_33_P3237580 | 4.13E-02 | 2.28  | uncharacterized LOC729220                                                        | Homo sapiens uncharacterized LOC729220 (FLJ45513), mRNA [NM_001242791]                                                                             |

|              |               |          |       |                                                                   |                                                                                                                          |
|--------------|---------------|----------|-------|-------------------------------------------------------------------|--------------------------------------------------------------------------------------------------------------------------|
| CLDN3        | A_33_P3285565 | 4.16E-02 | 2.14  | claudin 3                                                         | Homo sapiens claudin 3 (CLDN3), mRNA [NM_001306]                                                                         |
| MRGPRF       | A_23_P432573  | 4.20E-02 | -2.67 | MAS-related GPR, member F                                         | Homo sapiens MAS-related GPR, member F (MRGPRF), transcript variant 2, mRNA [NM_145015]                                  |
| ZFHX4        | A_23_P43095   | 4.22E-02 | 3.00  | zinc finger homeobox 4                                            | Homo sapiens zinc finger homeobox 4 (ZFHX4), mRNA [NM_024721]                                                            |
| ZC3H12B      | A_33_P3224735 | 4.22E-02 | 2.90  | zinc finger CCCH-type containing 12B                              | Homo sapiens zinc finger CCCH-type containing 12B (ZC3H12B), mRNA [NM_001010888]                                         |
| GDPD3        | A_23_P26511   | 4.23E-02 | 3.11  | glycerophosphodiester phosphodiesterase domain containing 3       | Homo sapiens glycerophosphodiester phosphodiesterase domain containing 3 (GDPD3), mRNA [NM_024307]                       |
| ATP8A2       | A_23_P258612  | 4.23E-02 | -5.39 | ATPase, aminophospholipid transporter, class I, type 8A, member 2 | Homo sapiens ATPase, aminophospholipid transporter, class I, type 8A, member 2 (ATP8A2), mRNA [NM_016529]                |
| IFIH1        | A_23_P68155   | 4.24E-02 | 2.10  | interferon induced with helicase C domain 1                       | Homo sapiens interferon induced with helicase C domain 1 (IFIH1), mRNA [NM_022168]                                       |
| ABCG1        | A_23_P166297  | 4.25E-02 | -2.04 | ATP-binding cassette, sub-family G (WHITE), member 1              | Homo sapiens ATP-binding cassette, sub-family G (WHITE), member 1 (ABCG1), transcript variant 5, mRNA [NM_207627]        |
| APCDD1       | A_23_P337262  | 4.26E-02 | 2.03  | adenomatosis polyposis coli down-regulated 1                      | Homo sapiens adenomatosis polyposis coli down-regulated 1 (APCDD1), mRNA [NM_153000]                                     |
| NUDT4        | A_24_P67946   | 4.27E-02 | -2.53 | nudix (nucleoside diphosphate linked moiety X)-type motif 4       | Homo sapiens nudix (nucleoside diphosphate linked moiety X)-type motif 4 (NUDT4), transcript variant 2, mRNA [NM_199040] |
| LOC100131176 | A_32_P138396  | 4.30E-02 | 3.06  | uncharacterized LOC100131176                                      | Homo sapiens cDNA FLJ38667 fis, clone HLUNG2006843. [AK095986]                                                           |
| CD300A       | A_23_P207037  | 4.30E-02 | 2.62  | CD300a molecule                                                   | Homo sapiens CD300a molecule                                                                                             |

|              |               |          |       |                                                                                    |                                                                                                                                      |
|--------------|---------------|----------|-------|------------------------------------------------------------------------------------|--------------------------------------------------------------------------------------------------------------------------------------|
| GPSM2        | A_23_P63402   | 4.30E-02 | -3.11 | G-protein signaling modulator 2                                                    | (CD300A), mRNA [NM_007261]<br>Homo sapiens G-protein signaling modulator 2 (GPSM2), mRNA [NM_013296]                                 |
| PVT1         | A_33_P3357748 | 4.32E-02 | 2.49  | Pvt1 oncogene (non-protein coding)                                                 | Homo sapiens Pvt1 oncogene (non-protein coding) (PVT1), non-coding RNA [NR_003367]                                                   |
| SRRM3        | A_23_P331700  | 4.34E-02 | -3.17 | serine/arginine repetitive matrix 3                                                | Homo sapiens serine/arginine repetitive matrix 3 (SRRM3), mRNA [NM_001110199]                                                        |
| LOC100129463 | A_33_P3373437 | 4.34E-02 | -2.14 | uncharacterized LOC100129463                                                       | PREDICTED: Homo sapiens hypothetical LOC100129463 (LOC100129463), miscRNA [XR_108760]                                                |
| GEMIN8P4     | A_32_P197621  | 4.34E-02 | -3.25 | gem (nuclear organelle) associated protein 8 pseudogene 4                          | Homo sapiens gem (nuclear organelle) associated protein 8 pseudogene 4 (GEMIN8P4), non-coding RNA [NR_002830]                        |
| LOC100129363 | A_33_P3307049 | 4.36E-02 | 2.14  | uncharacterized LOC100129363                                                       | Homo sapiens cDNA FLJ46623 fis, clone TLUNG2001810. [AK128478]                                                                       |
| TUBA3C       | A_23_P128598  | 4.37E-02 | -2.00 | tubulin, alpha 3c                                                                  | Homo sapiens tubulin, alpha 3c (TUBA3C), mRNA [NM_006001]                                                                            |
| TSPAN32      | A_23_P501722  | 4.37E-02 | 2.63  | tetraspanin 32                                                                     | Homo sapiens tetraspanin 32 (TSPAN32), mRNA [NM_139022]                                                                              |
| DDX31        | A_24_P112377  | 4.38E-02 | 2.22  | DEAD (Asp-Glu-Ala-Asp) box polypeptide 31                                          | Homo sapiens DEAD (Asp-Glu-Ala-Asp) box polypeptide 31 (DDX31), transcript variant 2, mRNA [NM_138620]                               |
| LGI4         | A_24_P310256  | 4.39E-02 | 2.18  | leucine-rich repeat LGI family, member 4                                           | Homo sapiens leucine-rich repeat LGI family, member 4 (LGI4), mRNA [NM_139284]                                                       |
| KCNMA1       | A_24_P156490  | 4.39E-02 | 3.32  | potassium large conductance calcium-activated channel, subfamily M, alpha member 1 | Homo sapiens potassium large conductance calcium-activated channel, subfamily M, alpha member 1 (KCNMA1), transcript variant 2, mRNA |

|              |               |          |       |                                                                 |                                                                                                                  |
|--------------|---------------|----------|-------|-----------------------------------------------------------------|------------------------------------------------------------------------------------------------------------------|
| FCRL2        | A_23_P160751  | 4.39E-02 | 3.45  | Fc receptor-like 2                                              | [NM_002247]<br>Homo sapiens Fc receptor-like 2 (FCRL2), mRNA [NM_030764]                                         |
| NQO2         | A_23_P58953   | 4.40E-02 | -2.37 | NAD(P)H dehydrogenase, quinone 2                                | Homo sapiens NAD(P)H dehydrogenase, quinone 2 (NQO2), mRNA [NM_000904]                                           |
| SNORD15A     | A_33_P3578325 | 4.40E-02 | 2.04  | small nucleolar RNA, C/D box 15A                                | Homo sapiens small nucleolar RNA, C/D box 15A (SNORD15A), small nucleolar RNA [NR_000005]                        |
| BEST3        | A_33_P3249877 | 4.41E-02 | -2.68 | bestrophin 3                                                    | bestrophin 3 [Source:HGNC Symbol;Acc:17105] [ENST00000331471]                                                    |
| LOC100506650 | A_33_P3339187 | 4.41E-02 | -2.39 | uncharacterized LOC100506650                                    | Homo sapiens uncharacterized LOC100506650 (LOC100506650), mRNA [NM_001243552]                                    |
| KLRG1        | A_23_P64898   | 4.41E-02 | 2.47  | killer cell lectin-like receptor subfamily G, member 1          | Homo sapiens killer cell lectin-like receptor subfamily G, member 1 (KLRG1), mRNA [NM_005810]                    |
| TTC9B        | A_33_P3293593 | 4.43E-02 | -2.41 | tetratricopeptide repeat domain 9B                              | Homo sapiens tetratricopeptide repeat domain 9B (TTC9B), mRNA [NM_152479]                                        |
| PCP4L1       | A_32_P214665  | 4.44E-02 | -2.21 | Purkinje cell protein 4 like 1                                  | Homo sapiens Purkinje cell protein 4 like 1 (PCP4L1), mRNA [NM_001102566]                                        |
| FRAT1        | A_33_P3261173 | 4.44E-02 | 2.16  | frequently rearranged in advanced T-cell lymphomas              | Homo sapiens frequently rearranged in advanced T-cell lymphomas (FRAT1), mRNA [NM_005479]                        |
| NKAPP1       | A_24_P365753  | 4.44E-02 | 2.19  | NFKB activating protein pseudogene 1                            | Homo sapiens NFKB activating protein pseudogene 1 (NKAPP1), non-coding RNA [NR_027131]                           |
| COQ5         | A_33_P3213512 | 4.44E-02 | -6.28 | coenzyme Q5 homolog, methyltransferase ( <i>S. cerevisiae</i> ) | coenzyme Q5 homolog, methyltransferase ( <i>S. cerevisiae</i> ) [Source:HGNC Symbol;Acc:28722] [ENST00000551769] |
| LOC150622    | A_33_P3361292 | 4.45E-02 | 3.98  | uncharacterized LOC150622                                       | Homo sapiens uncharacterized LOC150622 (LOC150622), non-coding RNA [NR_026832]                                   |

|         |                |          |       |                                                    |                                                                                                                  |
|---------|----------------|----------|-------|----------------------------------------------------|------------------------------------------------------------------------------------------------------------------|
| APCDD1L | A_32_P300427   | 4.45E-02 | 6.19  | adenomatosis polyposis coli down-regulated 1-like  | Homo sapiens adenomatosis polyposis coli down-regulated 1-like (APCDD1L), mRNA [NM_153360]                       |
| MYPN    | A_24_P376120   | 4.45E-02 | -2.19 | myopalladin                                        | Homo sapiens myopalladin (MYPN), mRNA [NM_032578]                                                                |
| MS4A4A  | A_23_P75769    | 4.45E-02 | 3.19  | membrane-spanning 4-domains, subfamily A, member 4 | Homo sapiens membrane-spanning 4-domains, subfamily A, member 4 (MS4A4A), transcript variant 2, mRNA [NM_024021] |
| VSIG7   | A_19_P00801412 | 4.47E-02 | 2.75  | V-set and immunoglobulin domain containing 7       | PREDICTED: Homo sapiens V-set and immunoglobulin domain containing 7 (VSIG7), mRNA [XM_003403542]                |
| NCF4    | A_33_P3365432  | 4.49E-02 | 2.63  | neutrophil cytosolic factor 4, 40kDa               | Homo sapiens neutrophil cytosolic factor 4, 40kDa (NCF4), transcript variant 1, mRNA [NM_000631]                 |
| FOLR2   | A_23_P47709    | 4.50E-02 | 3.03  | folate receptor 2 (fetal)                          | Homo sapiens folate receptor 2 (fetal) (FOLR2), transcript variant 1, mRNA [NM_000803]                           |
| VDR     | A_23_P162589   | 4.52E-02 | 3.32  | vitamin D (1,25-dihydroxyvitamin D3) receptor      | Homo sapiens vitamin D (1,25-dihydroxyvitamin D3) receptor (VDR), transcript variant 2, mRNA [NM_001017535]      |
| SCRG1   | A_23_P167159   | 4.54E-02 | 3.31  | stimulator of chondrogenesis 1                     | Homo sapiens stimulator of chondrogenesis 1 (SCRG1), mRNA [NM_007281]                                            |
| ZNF774  | A_33_P3230414  | 4.54E-02 | -2.17 | zinc finger protein 774                            | Homo sapiens zinc finger protein 774 (ZNF774), mRNA [NM_001004309]                                               |
| TLR6    | A_23_P256561   | 4.55E-02 | 2.14  | toll-like receptor 6                               | Homo sapiens toll-like receptor 6 (TLR6), mRNA [NM_006068]                                                       |
| KY      | A_33_P3412493  | 4.55E-02 | 3.27  | kyphoscoliosis peptidase                           | kyphoscoliosis peptidase [Source:HGNC Symbol;Acc:26576] [ENST00000506319]                                        |
| WBSCR27 | A_23_P381017   | 4.56E-02 | 5.68  | Williams Beuren syndrome chromosome region 27      | Homo sapiens Williams Beuren syndrome chromosome region 27                                                       |

|              |                |          |       |                                                                   |                                                                                                                                 |
|--------------|----------------|----------|-------|-------------------------------------------------------------------|---------------------------------------------------------------------------------------------------------------------------------|
| HIST1H3H     | A_33_P3404989  | 4.56E-02 | 2.02  | histone cluster 1, H3h                                            | (WBSCR27), mRNA [NM_152559]<br>Homo sapiens histone cluster 1, H3h (HIST1H3H), mRNA [NM_003536]                                 |
| LOC100130930 | A_33_P3361584  | 4.56E-02 | 2.38  | uncharacterized LOC100130930                                      | Homo sapiens cDNA FLJ44616 fis, clone BRACE2012936. [AK126579]                                                                  |
| KISS1        | A_23_P124892   | 4.58E-02 | -3.29 | KiSS-1 metastasis-suppressor                                      | Homo sapiens KiSS-1 metastasis-suppressor (KISS1), mRNA [NM_002256]                                                             |
| SYPL2        | A_33_P3385376  | 4.59E-02 | -2.06 | synaptophysin-like 2                                              | Homo sapiens synaptophysin-like 2 (SYPL2), mRNA [NM_001040709]                                                                  |
| FAAH         | A_33_P3261803  | 4.59E-02 | -2.15 | fatty acid amide hydrolase                                        | Homo sapiens fatty acid amide hydrolase (FAAH), mRNA [NM_001441]                                                                |
| XLOC_007052  | A_19_P00320885 | 4.60E-02 | -2.79 |                                                                   | DKFZp779O0656_r1 779 (synonym: hncc1) Homo sapiens cDNA clone DKFZp779O0656 5', mRNA sequence [BX500531]                        |
| ZNF575       | A_23_P401084   | 4.60E-02 | 2.10  | zinc finger protein 575                                           | Homo sapiens zinc finger protein 575 (ZNF575), mRNA [NM_174945]                                                                 |
| LOC100128843 | A_32_P834166   | 4.61E-02 | -2.52 | uncharacterized LOC100128843                                      | Homo sapiens DNA polymerase epsilon catalytic subunit isoform a (POLE1) mRNA, partial cds. [AF128541]                           |
| NPL          | A_33_P3414912  | 4.61E-02 | 2.75  | N-acetylneuraminase pyruvate lyase (dihydrodipicolinate synthase) | Homo sapiens N-acetylneuraminase pyruvate lyase (dihydrodipicolinate synthase) (NPL), transcript variant 3, mRNA [NM_001200056] |
| LOC100132111 | A_33_P3369441  | 4.62E-02 | 2.46  | uncharacterized LOC100132111                                      | Homo sapiens uncharacterized LOC100132111 (LOC100132111), non-coding RNA [NR_024237]                                            |
| PYGO1        | A_32_P530933   | 4.62E-02 | -2.41 | pygopus homolog 1 (Drosophila)                                    | Homo sapiens pygopus homolog 1 (Drosophila) (PYGO1), mRNA [NM_015617]                                                           |
| PVRL1        | A_23_P76034    | 4.64E-02 | -2.44 | poliovirus receptor-related 1 (herpesvirus entry mediator C)      | Homo sapiens poliovirus receptor-related 1 (herpesvirus entry mediator C) (PVRL1), transcript variant 3, mRNA                   |

|              |                |          |       |                                                         |                                                                                                                                      |
|--------------|----------------|----------|-------|---------------------------------------------------------|--------------------------------------------------------------------------------------------------------------------------------------|
| FCGR3A       | A_23_P200728   | 4.65E-02 | 4.37  | Fc fragment of IgG, low affinity IIIa, receptor (CD16a) | [NM_203286]<br>Homo sapiens Fc fragment of IgG, low affinity IIIa, receptor (CD16a) (FCGR3A), transcript variant 1, mRNA [NM_000569] |
| USP31        | A_23_P206612   | 4.65E-02 | -2.20 | ubiquitin specific peptidase 31                         | Homo sapiens ubiquitin specific peptidase 31 (USP31), mRNA [NM_020718]                                                               |
| AVIL         | A_24_P419087   | 4.65E-02 | 2.45  | advillin                                                | Homo sapiens advillin (AVIL), mRNA [NM_006576]                                                                                       |
| PPM1J        | A_23_P201939   | 4.67E-02 | -2.03 | protein phosphatase, Mg2+/Mn2+ dependent, 1J            | Homo sapiens protein phosphatase, Mg2+/Mn2+ dependent, 1J (PPM1J), mRNA [NM_005167]                                                  |
| XLOC_005647  | A_19_P00807468 | 4.68E-02 | -5.01 |                                                         | BROAD Institute lincRNA (XLOC_005647), lincRNA [TCONS_00012114]                                                                      |
| C11orf35     | A_33_P3377005  | 4.71E-02 | 2.08  | chromosome 11 open reading frame 35                     | Homo sapiens chromosome 11 open reading frame 35 (C11orf35), mRNA [NM_173573]                                                        |
| PITX1        | A_33_P3240328  | 4.71E-02 | 3.53  | paired-like homeodomain 1                               | Homo sapiens paired-like homeodomain 1 (PITX1), mRNA [NM_002653]                                                                     |
| LOC100506639 | A_19_P00317159 | 4.71E-02 | 2.52  |                                                         | PREDICTED: Homo sapiens hypothetical LOC100506639 (LOC100506639), miscRNA [XR_108576]                                                |
| XLOC_013282  | A_19_P00320440 | 4.71E-02 | 2.06  |                                                         | HUMIGTB1A integrin beta-1 subunit {Homo sapiens} (exp=-1; wgp=0; cg=0), partial (25%) [THC2549799]                                   |
| MEGF6        | A_24_P926960   | 4.71E-02 | 2.85  | multiple EGF-like-domains 6                             | Homo sapiens multiple EGF-like-domains 6 (MEGF6), mRNA [NM_001409]                                                                   |
| MS4A14       | A_23_P98565    | 4.72E-02 | 2.85  | membrane-spanning 4-domains, subfamily A, member 14     | Homo sapiens membrane-spanning 4-domains, subfamily A, member 14 (MS4A14), transcript variant 1, mRNA [NM_032597]                    |
| ISLR2        | A_32_P379467   | 4.72E-02 | 2.63  | immunoglobulin superfamily                              | Homo sapiens immunoglobulin                                                                                                          |

|             |                |          |       |                                                                         |                                                                                                                  |
|-------------|----------------|----------|-------|-------------------------------------------------------------------------|------------------------------------------------------------------------------------------------------------------|
|             |                |          |       | containing leucine-rich repeat 2                                        | superfamily containing leucine-rich repeat 2 (ISLR2), transcript variant 2, mRNA [NM_020851]                     |
| PCBP3       | A_23_P147255   | 4.72E-02 | -2.56 | poly(rC) binding protein 3                                              | Homo sapiens poly(rC) binding protein 3 (PCBP3), transcript variant 1, mRNA [NM_020528]                          |
| LINC00256A  | A_24_P687326   | 4.72E-02 | 2.18  | long intergenic non-protein coding RNA 256A                             | Homo sapiens long intergenic non-protein coding RNA 256A (LINC00256A), non-coding RNA [NR_024366]                |
| GAB3        | A_33_P3251369  | 4.74E-02 | 2.39  | GRB2-associated binding protein 3                                       | Homo sapiens GRB2-associated binding protein 3 (GAB3), transcript variant 1, mRNA [NM_001081573]                 |
| XLOC_006883 | A_19_P00322611 | 4.75E-02 | 2.89  |                                                                         | BROAD Institute lincRNA (XLOC_006883), lincRNA [TCONS_00014809]                                                  |
| LINC00246A  | A_23_P387585   | 4.76E-02 | 2.94  | long intergenic non-protein coding RNA 246A                             | Homo sapiens long intergenic non-protein coding RNA 246A (LINC00246A), non-coding RNA [NR_026595]                |
| THBS3       | A_23_P201047   | 4.76E-02 | 2.23  | thrombospondin 3                                                        | Homo sapiens thrombospondin 3 (THBS3), mRNA [NM_007112]                                                          |
| TGFBR2      | A_33_P3313825  | 4.78E-02 | 3.28  | transforming growth factor, beta receptor II (70/80kDa)                 | transforming growth factor, beta receptor II (70/80kDa) [Source:HGNC Symbol;Acc:11773] [ENST00000383765]         |
| ATP1A1OS    | A_33_P3229215  | 4.78E-02 | 3.21  | ATP1A1 opposite strand                                                  | Homo sapiens ATP1A1 opposite strand (ATP1A1OS), transcript variant 3, non-coding RNA [NR_024126]                 |
| RYR1        | A_23_P78867    | 4.79E-02 | 2.28  | ryanodine receptor 1 (skeletal)                                         | Homo sapiens ryanodine receptor 1 (skeletal) (RYR1), transcript variant 1, mRNA [NM_000540]                      |
| SLC24A1     | A_23_P205913   | 4.80E-02 | 2.46  | solute carrier family 24 (sodium/potassium/calcium exchanger), member 1 | Homo sapiens solute carrier family 24 (sodium/potassium/calcium exchanger), member 1 (SLC24A1), mRNA [NM_004727] |

|             |                |          |       |                                                     |                                                                                                                 |
|-------------|----------------|----------|-------|-----------------------------------------------------|-----------------------------------------------------------------------------------------------------------------|
| TACSTD2     | A_23_P149529   | 4.80E-02 | 4.50  | tumor-associated calcium signal transducer 2        | Homo sapiens tumor-associated calcium signal transducer 2 (TACSTD2), mRNA [NM_002353]                           |
| NUAK2       | A_33_P3338166  | 4.80E-02 | 2.06  | NUAK family, SNF1-like kinase, 2                    | Homo sapiens NUAK family, SNF1-like kinase, 2 (NUAK2), mRNA [NM_030952]                                         |
| XLOC_007290 | A_19_P00322813 | 4.81E-02 | -2.13 |                                                     | BC064849 C9orf93 protein {Homo sapiens} (exp=0; wgp=1; cg=0), partial (11%) [THC2626540]                        |
| C10orf57    | A_23_P97853    | 4.83E-02 | 2.31  | chromosome 10 open reading frame 57                 | Homo sapiens chromosome 10 open reading frame 57 (C10orf57), mRNA [NM_025125]                                   |
| RAB11FIP4   | A_23_P38427    | 4.83E-02 | 3.16  | RAB11 family interacting protein 4 (class II)       | Homo sapiens RAB11 family interacting protein 4 (class II) (RAB11FIP4), mRNA [NM_032932]                        |
| OR6K2       | A_23_P51761    | 4.85E-02 | -2.00 | olfactory receptor, family 6, subfamily K, member 2 | Homo sapiens olfactory receptor, family 6, subfamily K, member 2 (OR6K2), mRNA [NM_001005279]                   |
| ADAMDEC1    | A_33_P3390172  | 4.85E-02 | 2.69  | ADAM-like, decysin 1                                | Homo sapiens ADAM-like, decysin 1 (ADAMDEC1), transcript variant 2, mRNA [NM_001145271]                         |
| AQP7        | A_23_P158041   | 4.87E-02 | -2.02 | aquaporin 7                                         | Homo sapiens aquaporin 7 (AQP7), mRNA [NM_001170]                                                               |
| STAT4       | A_23_P305198   | 4.87E-02 | 3.35  | signal transducer and activator of transcription 4  | Homo sapiens signal transducer and activator of transcription 4 (STAT4), transcript variant 1, mRNA [NM_003151] |
| LOC729995   | A_33_P3324298  | 4.87E-02 | -2.46 | hCG1817208                                          | PREDICTED: Homo sapiens hCG1817208 (LOC729995), miscRNA [XR_110198]                                             |
| ENKUR       | A_33_P3323136  | 4.88E-02 | 2.58  | enkurin, TRPC channel interacting protein           | Homo sapiens enkurin, TRPC channel interacting protein (ENKUR), mRNA [NM_145010]                                |
| IL17RB      | A_24_P157370   | 4.88E-02 | -3.70 | interleukin 17 receptor B                           | Homo sapiens interleukin 17 receptor B (IL17RB), mRNA [NM_018725]                                               |
| SMOC2       | A_23_P70307    | 4.89E-02 | 2.34  | SPARC related modular calcium                       | Homo sapiens SPARC related modular                                                                              |

|              |               |          |       |                                                     |                                                                                                                      |
|--------------|---------------|----------|-------|-----------------------------------------------------|----------------------------------------------------------------------------------------------------------------------|
|              |               |          |       | binding 2                                           | calcium binding 2 (SMOC2), transcript variant 1, mRNA [NM_022138]                                                    |
| FMOD         | A_23_P114883  | 4.89E-02 | 3.78  | fibromodulin                                        | Homo sapiens fibromodulin (FMOD), mRNA [NM_002023]                                                                   |
| LOC440104    | A_24_P93703   | 4.90E-02 | 2.15  | 1110012D08Rik pseudogene                            | Homo sapiens 1110012D08Rik pseudogene (LOC440104), transcript variant 1, non-coding RNA [NR_036476]                  |
| SCARNA10     | A_33_P3363120 | 4.91E-02 | 2.39  | small Cajal body-specific RNA 10                    | Homo sapiens small Cajal body-specific RNA 10 (SCARNA10), guide RNA [NR_004387]                                      |
| SORCS1       | A_33_P3414192 | 4.92E-02 | -2.14 | sortilin-related VPS10 domain containing receptor 1 | Homo sapiens sortilin-related VPS10 domain containing receptor 1 (SORCS1), transcript variant 6, mRNA [NM_001206572] |
| LOC100129196 | A_24_P401830  | 4.93E-02 | 2.62  | uncharacterized LOC100129196                        | Homo sapiens uncharacterized LOC100129196 (LOC100129196), non-coding RNA [NR_034182]                                 |
| UBE2L6       | A_23_P75741   | 4.94E-02 | 2.12  | ubiquitin-conjugating enzyme E2L 6                  | Homo sapiens ubiquitin-conjugating enzyme E2L 6 (UBE2L6), transcript variant 2, mRNA [NM_198183]                     |
| FAM83B       | A_24_P66780   | 4.97E-02 | -3.77 | family with sequence similarity 83, member B        | Homo sapiens family with sequence similarity 83, member B (FAM83B), mRNA [NM_001010872]                              |

---
