# Supplementary material for: miRNAs may play a major role in the control of gene expression in key pathobiological processes in Chagas disease cardiomyopathy
Source: PubMed Central journal article supplement (PMC7787679; doi:10.1371/journal.pntd.0008889), 2020-12-22
Supplement: pntd.0008889.s002.pdf [file pntd.0008889.s002.pdf]

**S2 table.** Description of the canonical pathways containing the DEGs in CCC myocardium.

| Canonical Pathways                     | p-value | Ratio    | z-score | Molecules                                                                                                                                                                                                                                                                                                                                                                              |
|----------------------------------------|---------|----------|---------|----------------------------------------------------------------------------------------------------------------------------------------------------------------------------------------------------------------------------------------------------------------------------------------------------------------------------------------------------------------------------------------|
| Th1 and Th2 Activation Pathway         | 2,5E-20 | 2,69E-01 |         | CCR5, CD247, CD3D, CD3E, CD3G, CD40LG, CD8A, CXCR3, CXCR4, CXCR6, GFI1, HLA-A, HLA-DMA, HLA-DMB, HLA-DOA, HLA-DOB, HLA-DPA1, HLA-DPB1, HLA-DQB1, HLA-DQB2, HLA-DRB1, HLA-DRB5, ICOS, IFNG, IKZF1, IL10RA, IL12RB1, IL12RB2, IL17RB, IL18, IL2RB, IL2RG, IL4, ITGB2, JAK3, KLRC1, KLRD1, NFATC2, NOTCH2, PIK3CG, PIK3R1, PIK3R5, PRKCQ, RUNX3, SOCS1, STAT1, STAT4, TBX21, TGFBR2, VAV1 |
| Th1 Pathway                            | 1,0E-19 | 3,09E-01 | 5,209   | CCR5, CD247, CD3D, CD3E, CD3G, CD40LG, CD8A, CXCR3, HLA-A, HLA-DMA, HLA-DMB, HLA-DOA, HLA-DOB, HLA-DPA1, HLA-DPB1, HLA-DQB1, HLA-DQB2, HLA-DRB1, HLA-DRB5, ICOS, IFNG, IL10RA, IL12RB1, IL12RB2, IL18, IL4, ITGB2, JAK3, KLRC1, KLRD1, NFATC2, NOTCH2, PIK3CG, PIK3R1, PIK3R5, PRKCQ, RUNX3, SOCS1, STAT1, STAT4, TBX21, VAV1                                                          |
| Th2 Pathway                            | 4,0E-17 | 2,73E-01 | 1,800   | CCR5, CD247, CD3D, CD3E, CD3G, CXCR4, CXCR6, GFI1, HLA-A, HLA-DMA, HLA-DMB, HLA-DOA, HLA-DOB, HLA-DPA1, HLA-DPB1, HLA-DQB1, HLA-DQB2, HLA-DRB1, HLA-DRB5, ICOS, IFNG, IKZF1, IL12RB1, IL12RB2, IL17RB, IL2RB, IL2RG, IL4, ITGB2, JAK3, NFATC2, NOTCH2, PIK3CG, PIK3R1, PIK3R5, PRKCQ, RUNX3, STAT4, TBX21, TGFBR2, VAV1                                                                |
| iCOS-iCOSL Signaling in T Helper Cells | 2,0E-13 | 2,6E-01  | 5,014   | CAMK4, CD247, CD3D, CD3E, CD3G, CD40LG, GRAP2, HLA-A, HLA-DMA, HLA-DMB, HLA-DOA, HLA-DOB, HLA-DQB1, HLA-DRB1, HLA-DRB5, ICOS, IKBKE, IL2RB, IL2RG, INPP5D, ITK, LAT, LCK, LCP2, NFATC2, PIK3CG, PIK3R1, PIK3R5, PRKCQ, PTPRC, TRAT1, VAV1, ZAP70                                                                                                                                       |
| CD28 Signaling in T Helper Cells       | 1,6E-12 | 2,43E-01 | 3,273   | CAMK4, CARD11, CD247, CD3D, CD3E, CD3G, CDC42, CTLA4, GRAP2, HLA-A, HLA-DMA, HLA-DMB, HLA-DOA, HLA-DOB, HLA-DQB1, HLA-DRB1, HLA-DRB5, IKBKE, ITK, LAT, LCK, LCP2, NFATC2, PIK3CG, PIK3R1, PIK3R5, PRKCQ, PTPN6, PTPRC, SYK, VAV1, WAS, ZAP70                                                                                                                                           |
| Natural Killer Cell Signaling          | 6,3E-12 | 2,44E-01 |         | CD244, CD247, CD300A, FCGR3A/FCGR3B, HCST, INPP5D, KIR2DS2 (includes others), KLRB1, KLRC1, KLRC3, KLRC4-KLRK1/KLRK1, KLRD1, LAIR1, LAT, LCK, LCP2, LILRB1, NCR3,                                                                                                                                                                                                                      |

|                                                             |         |          |       |                                                                                                                                                                                                                                                                                               |
|-------------------------------------------------------------|---------|----------|-------|-----------------------------------------------------------------------------------------------------------------------------------------------------------------------------------------------------------------------------------------------------------------------------------------------|
| T Cell Receptor Signaling                                   | 6,3E-11 | 2,46E-01 |       | PIK3CG, PIK3R1, PIK3R5, PRKCB, PRKCQ, PTPN6, RAC2, SH2D1A, SYK, TYROBP, VAV1, VAV3, ZAP70<br>BTK, CAMK4, CARD11, CD247, CD3D, CD3E, CD3G, CD8A, CD8B, CTLA4, GRAP2, IKBKE, ITK, LAT, LCK, LCP2, NFATC2, PIK3CG, PIK3R1, PIK3R5, PRKCB, PRKCQ, PTPN7, PTPRC, PTPRH, RASGRP1, VAV1, VAV3, ZAP70 |
| Antigen Presentation Pathway                                | 1,1E-10 | 4,21E-01 |       | CD74, HLA-A, HLA-DMA, HLA-DMB, HLA-DOA, HLA-DOB, HLA-DPA1, HLA-DPB1, HLA-DQB1, HLA-DQB2, HLA-DRB1, HLA-DRB5, HLA-E, HLA-F, IFNG, MR1                                                                                                                                                          |
| T Helper Cell Differentiation                               | 1,2E-10 | 2,97E-01 |       | CD40LG, HLA-A, HLA-DMA, HLA-DMB, HLA-DOA, HLA-DOB, HLA-DQB1, HLA-DRB1, HLA-DRB5, ICOS, IFNG, IL10RA, IL12RB1, IL12RB2, IL18, IL21R, IL2RG, IL4, STAT1, STAT4, TBX21, TGFBR2                                                                                                                   |
| Communication between Innate and Adaptive Immune Cells      | 2,1E-10 | 2,67E-01 |       | CCL3, CCL3L3, CCL4, CCL5, CCR7, CD40LG, CD8A, CD8B, CXCL10, HLA-A, HLA-DRB1, HLA-DRB5, HLA-E, HLA-F, IFNG, IL18, IL4, TLR3, TLR5, TLR6, TLR8, TNFRSF17, TNFSF13, TNFSF13B                                                                                                                     |
| Crosstalk between Dendritic Cells and Natural Killer Cells  | 2,1E-10 | 2,67E-01 |       | CCR7, CD226, CD40LG, CD69, FASLG, HLA-A, HLA-DRB1, HLA-DRB5, HLA-E, HLA-F, IFNG, IL15RA, IL18, IL2RB, IL2RG, IL4, ITGAL, KLRC4-KLRK1/KLRK1, KLRD1, LTB, NCR3, PRF1, TLR3, TYROBP                                                                                                              |
| Altered T Cell and B Cell Signaling in Rheumatoid Arthritis | 2,1E-10 | 2,67E-01 |       | CD40LG, CD79A, FASLG, HLA-A, HLA-DMA, HLA-DMB, HLA-DOA, HLA-DOB, HLA-DQB1, HLA-DRB1, HLA-DRB5, IFNG, IL18, IL23A, IL4, LTB, SLAMF1, TLR3, TLR5, TLR6, TLR8, TNFRSF17, TNFSF13, TNFSF13B                                                                                                       |
| Pathogenesis of Multiple Sclerosis                          | 1,1E-09 | 8,89E-01 |       | CCL3, CCL4, CCL5, CCR5, CXCL10, CXCL11, CXCL9, CXCR3                                                                                                                                                                                                                                          |
| Calcium-induced T Lymphocyte Apoptosis                      | 1,8E-09 | 2,86E-01 | 4,025 | ATP2A2, ATP2A3, CAMK4, CD247, CD3D, CD3E, CD3G, HLA-A, HLA-DMA, HLA-DMB, HLA-DOA, HLA-DOB, HLA-DQB1, HLA-DRB1, HLA-DRB5, LCK, NFATC2, PRKCB, PRKCQ, ZAP70                                                                                                                                     |
| B Cell Development                                          | 3,6E-09 | 0,4      |       | CD19, CD79A, HLA-A, HLA-DMA, HLA-DMB, HLA-DOA, HLA-DOB, HLA-DQB1, HLA-DRB1, HLA-DRB5, IL7, IL7R, PTPRC, SPN                                                                                                                                                                                   |
| Primary Immunodeficiency Signaling                          | 6,5E-09 | 3,33E-01 |       | BLNK, BTK, CD19, CD3D, CD3E, CD40LG, CD79A, CD8A, ICOS, IGLL1/IGLL5, IL2RG, IL7R, JAK3, LCK, PTPRC, ZAP70                                                                                                                                                                                     |
| Autoimmune Thyroid Disease Signaling                        | 8,9E-09 | 3,27E-01 |       | CD40LG, CGA, FASLG, GZMB, HLA-A, HLA-DMA, HLA-DMB, HLA-DOA, HLA-DOB, HLA-DQB1, HLA-DRB1, HLA-DRB5, HLA-E, HLA-F, IL4, PRF1                                                                                                                                                                    |
| CTLA4 Signaling in Cytotoxic T Lymphocytes                  | 9,3E-09 | 2,32E-01 |       | AP1S3, CD247, CD3D, CD3E, CD3G, CD8A, CD8B, CTLA4, GRAP2, HLA-A, LAT, LCK, LCP2, PIK3CG, PIK3R1, PIK3R5, PPM1J, PPP2R2B, PTPN22, PTPN6, SYK, TRAT1, ZAP70                                                                                                                                     |

|                                                                 |         |          |       |                                                                                                                                                                                                                                             |
|-----------------------------------------------------------------|---------|----------|-------|---------------------------------------------------------------------------------------------------------------------------------------------------------------------------------------------------------------------------------------------|
| PKCθ Signaling in T Lymphocytes                                 | 1,9E-08 | 1,99E-01 | 4,796 | CARD11, CD247, CD3D, CD3E, CD3G, GRAP2, HLA-A, HLA-DMA, HLA-DMB, HLA-DOA, HLA-DOB, HLA-DQB1, HLA-DRB1, HLA-DRB5, IKBKE, LAT, LCK, LCP2, NFATC2, PIK3CG, PIK3R1, PIK3R5, PRKCQ, RAC2, VAV1, VAV3, ZAP70                                      |
| Leukocyte Extravasation Signaling                               | 4,0E-08 | 1,62E-01 | 3,651 | ARHGAP4, ARHGAP9, BCAR1, BTK, CDC42, CLDN14, CLDN3, CXCR4, CYBA, ITGA4, ITGAL, ITGB2, ITK, MMP25, MMP9, NCF1, NCF2, NCF4, PIK3CG, PIK3R1, PIK3R5, PRKCB, PRKCQ, PTK2, PTK2B, RAC2, RASGRP1, RHOH, SELPLG, SPN, THY1, VAV1, VAV3, WAS, WIPF1 |
| Graft-versus-Host Disease Signaling                             | 6,9E-08 | 3,06E-01 |       | FASLG, GZMB, HLA-A, HLA-DMA, HLA-DMB, HLA-DOA, HLA-DOB, HLA-DQB1, HLA-DRB1, HLA-DRB5, HLA-E, HLA-F, IFNG, IL18, PRF1                                                                                                                        |
| Type I Diabetes Mellitus Signaling                              | 9,1E-08 | 2,07E-01 | 0,000 | CASP8, CD247, CD3D, CD3E, CD3G, CYCS, FASLG, GZMB, HLA-A, HLA-DMA, HLA-DMB, HLA-DOA, HLA-DOB, HLA-DQB1, HLA-DRB1, HLA-DRB5, HLA-E, HLA-F, IFNG, IKBKE, PRF1, SOCS1, STAT1                                                                   |
| Granulocyte Adhesion and Diapedesis                             | 1,7E-07 | 1,68E-01 |       | C5, CCL14, CCL17, CCL19, CCL28, CCL3, CCL3L3, CCL4, CCL5, CLDN14, CLDN3, CXCL10, CXCL11, CXCL16, CXCL9, CXCR2, CXCR4, HRH2, IL18, IL18RAP, ITGA4, ITGAL, ITGB2, MMP25, MMP9, SDC1, SELL, SELPLG, THY1, XCL1                                 |
| Role of NFAT in Regulation of the Immune Response               | 2,2E-07 | 1,62E-01 | 5,112 | BLNK, BTK, CAMK4, CD247, CD3D, CD3E, CD3G, CD79A, FCGR3A/FCGR3B, GATA4, HLA-A, HLA-DMA, HLA-DMB, HLA-DOA, HLA-DOB, HLA-DQB1, HLA-DRB1, HLA-DRB5, IKBKE, ITK, LAT, LCK, LCP2, NFATC2, PIK3CG, PIK3R1, PIK3R5, PLCB2, PRKCQ, SYK, ZAP70       |
| Allograft Rejection Signaling                                   | 3,4E-07 | 2,24E-01 |       | CD40LG, FASLG, GZMB, HLA-A, HLA-DMA, HLA-DMB, HLA-DOA, HLA-DOB, HLA-DPA1, HLA-DPB1, HLA-DQB1, HLA-DQB2, HLA-DRB1, HLA-DRB5, HLA-E, HLA-F, IFNG, IL4, PRF1                                                                                   |
| Fcγ Receptor-mediated Phagocytosis in Macrophages and Monocytes | 9,5E-07 | 2,02E-01 | 4,025 | CDC42, FCGR3A/FCGR3B, FGR, FYB1, INPP5D, LCP2, MYO5A, NCF1, NCK2, PIK3CG, PIK3R1, PLD4, PRKCB, PRKCQ, PTK2B, RAC2, SYK, VAV1, VAV3, WAS                                                                                                     |
| Complement System                                               | 9,8E-07 | 3,16E-01 | 1,414 | C1QA, C1QB, C1QC, C1S, C2, C5, C8G, CD59, CFB, CFH, ITGAX, ITGB2                                                                                                                                                                            |
| IL-4 Signaling                                                  | 1,0E-06 | 2,09E-01 |       | HLA-A, HLA-DMA, HLA-DMB, HLA-DOA, HLA-DOB, HLA-DQB1, HLA-DRB1, HLA-DRB5, IL2RG, IL4, INPP5D, IRF4, JAK3, NFATC2, PIK3CG, PIK3R1, PIK3R5, PTPN6, SOCS1                                                                                       |
| Dendritic Cell Maturation                                       | 2,2E-06 | 1,52E-01 | 5,196 | CCR7, CD1B, CD1C, CD40LG, COL1A2, COL3A1, FCGR3A/FCGR3B, HLA-A, HLA-DMA, HLA-DMB, HLA-DOA, HLA-DOB, HLA-DQB1, HLA-DRB1, HLA-DRB5, IKBKE, IL18, IL23A,                                                                                       |

|                                                                              |         |          |        |                                                                                                                                                                                                       |
|------------------------------------------------------------------------------|---------|----------|--------|-------------------------------------------------------------------------------------------------------------------------------------------------------------------------------------------------------|
| Role of JAK1 and JAK3 in $\gamma$ c Cytokine Signaling                       | 2,5E-06 | 2,25E-01 |        | IRF8, LTB, LY75, PIK3CG, PIK3R1, PIK3R5, PLCB2, STAT1, STAT4, TLR3, TYROBP                                                                                                                            |
| OX40 Signaling Pathway                                                       | 3,2E-06 | 2,02E-01 | -1,342 | BLNK, IL15RA, IL21R, IL2RB, IL2RG, IL4, IL7, IL7R, JAK3, PIK3CG, PIK3R1, PIK3R5, PTK2B, SOCS1, STAT1, SYK                                                                                             |
| Nur77 Signaling in T Lymphocytes                                             | 6,9E-06 | 2,33E-01 |        | CD247, CD3D, CD3E, CD3G, HLA-A, HLA-DMA, HLA-DMB, HLA-DOA, HLA-DOB, HLA-DPA1, HLA-DPB1, HLA-DQB1, HLA-DQB2, HLA-DRB1, HLA-DRB5, HLA-E, HLA-F, TRAF5                                                   |
| Cytotoxic T Lymphocyte-mediated Apoptosis of Target Cells                    | 8,9E-06 | 3,12E-01 | -0,333 | CAMK4, CD247, CD3D, CD3E, CD3G, CYCS, HLA-A, HLA-DMA, HLA-DMB, HLA-DOA, HLA-DOB, HLA-DQB1, HLA-DRB1, HLA-DRB5                                                                                         |
| Agranulocyte Adhesion and Diapedesis                                         | 1,7E-05 | 1,42E-01 |        | CASP8, CD247, CD3D, CD3E, CD3G, CYCS, FASLG, GZMB, HLA-A, PRF1                                                                                                                                        |
| Cdc42 Signaling                                                              | 1,7E-05 | 1,48E-01 | 0,000  | C5, CCL14, CCL17, CCL19, CCL28, CCL3, CCL3L3, CCL4, CCL5, CLDN14, CLDN3, CXCL10, CXCL11, CXCL16, CXCL9, CXCR2, CXCR4, IL18, ITGA4, ITGB2, ITGB7, MMP25, MMP9, MYH6, SELL, SELPLG, XCL1                |
| Role of Pattern Recognition Receptors in Recognition of Bacteria and Viruses | 4,7E-05 | 1,53E-01 | 4,000  | CD247, CD3D, CD3E, CD3G, CDC42, FGD3, HLA-A, HLA-DMA, HLA-DMB, HLA-DOA, HLA-DOB, HLA-DPA1, HLA-DPB1, HLA-DQB1, HLA-DQB2, HLA-DRB1, HLA-DRB5, HLA-E, HLA-F, ITGA4, ITK, MPRIP, VAV1, WAS, WIPF1        |
| Atherosclerosis Signaling                                                    | 5,2E-05 | 1,56E-01 |        | C1QA, C1QB, C1QC, C5, CCL5, IFIH1, IFNG, IL18, IL4, NLRC4, NLRP3, PIK3CG, PIK3R1, PIK3R5, PRKCB, PRKCQ, SYK, TLR3, TLR5, TLR6, TLR8                                                                   |
| Phagosome Formation                                                          | 8,5E-05 | 1,56E-01 |        | ALOX15B, APOA1, CCR2, CD40LG, CMA1, COL1A2, COL3A1, CXCR4, IFNG, IL18, ITGA4, ITGB2, MMP9, PLA2G4F, PLA2G7, PLAAT4, PLB1, SELPLG, SERPINA1, TNFSF14                                                   |
| Hepatic Fibrosis / Hepatic Stellate Cell Activation                          | 9,5E-05 | 1,34E-01 |        | FCAR, FCGR3A/FCGR3B, FNBP1, INPP5D, ITGA4, MRC1, PIK3CG, PIK3R1, PIK3R5, PLCB2, PRKCB, PRKCQ, RHOD, RHOH, SYK, TLR3, TLR5, TLR6, TLR8                                                                 |
| Systemic Lupus Erythematosus Signaling                                       | 1,8E-04 | 1,22E-01 |        | CCL5, CCR5, CCR7, CD40LG, COL16A1, COL1A2, COL3A1, COL4A3, COL4A4, COL5A1, COL5A2, COL6A6, CXCL9, CXCR3, FASLG, IFNG, IGF1, IL10RA, IL18RAP, IL4, MET, MMP9, MYH6, STAT1, TGFBR2                      |
|                                                                              |         |          |        | C5, C8G, CAMK4, CD247, CD3D, CD3E, CD3G, CD40LG, CD72, CD79A, FCGR3A/FCGR3B, HLA-A, HLA-E, HLA-F, IL18, INPP5D, KNG1, LAT, LCK, NFATC2, PIK3CG, PIK3R1, PIK3R5, PIM2, PTPN6, PTPRC, RNU2-2P, TNFSF13B |

|                                                                                |         |          |       |                                                                                                                                                                                                                                        |
|--------------------------------------------------------------------------------|---------|----------|-------|----------------------------------------------------------------------------------------------------------------------------------------------------------------------------------------------------------------------------------------|
| Tec Kinase Signaling                                                           | 1,9E-04 | 1,33E-01 | 3,838 | BLK, BTK, FASLG, FGR, FNBP1, ITGA4, ITK, JAK3, LCK, PIK3CG, PIK3R1, PIK3R5, PRKCB, PRKCQ, PTK2, PTK2B, RHOD, RHOH, STAT1, STAT4, VAV1, VAV3, WAS                                                                                       |
| PI3K Signaling in B Lymphocytes                                                | 2,7E-04 | 1,43E-01 | 3,441 | BLK, BLNK, BTK, CAMK4, CD19, CD79A, DAPP1, IKBKE, IL4, INPP5D, NFATC2, PIK3CG, PIK3R1, PLCB2, PRKCB, PTPRC, SYK, VAV1, VAV3                                                                                                            |
| Phospholipase C Signaling                                                      | 3,0E-04 | 1,17E-01 | 3,128 | ADCY7, ARHGEF16, BLNK, BTK, CAMK4, CD247, CD3D, CD3E, CD3G, CD79A, FNBP1, GRAP2, HDAC10, ITGA4, ITK, LAT, LCK, LCP2, MPRIP, NFATC2, PLA2G4F, PLCB2, PLD4, PRKCB, PRKCQ, RHOD, RHOH, SYK, ZAP70                                         |
| B Cell Receptor Signaling                                                      | 3,1E-04 | 1,26E-01 | 2,711 | APBB1IP, BLNK, BTK, CAMK4, CD19, CD79A, CDC42, DAPP1, IKBKE, INPP5D, NFATC2, PIK3CG, PIK3R1, PIK3R5, PRKCB, PRKCQ, PTK2, PTK2B, PTPN6, PTPRC, RAC2, SYK, VAV1, VAV3                                                                    |
| CCR5 Signaling in Macrophages                                                  | 3,2E-04 | 1,76E-01 |       | CAMK4, CCL3, CCL4, CCL5, CCR5, CD247, CD3D, CD3E, CD3G, FASLG, PRKCB, PRKCQ, PTK2B                                                                                                                                                     |
| Tumoricidal Function of Hepatic Natural Killer Cells                           | 3,3E-04 | 2,92E-01 | 1,342 | CASP8, CYCS, ENDOG, FASLG, GZMB, ITGAL, PRF1                                                                                                                                                                                           |
| Production of Nitric Oxide and Reactive Oxygen Species in Macrophages          | 6,2E-04 | 1,21E-01 | 3,838 | APOA1, CYBA, FNBP1, IFNG, IKBKE, IL4, IRF8, JAK3, NCF1, NCF2, NCF4, PIK3CG, PIK3R1, PIK3R5, PPM1J, PPP1CC, PPP2R2B, PRKCB, PRKCQ, PTPN6, RHOD, RHOH, SERPINA1, STAT1                                                                   |
| Regulation of IL-2 Expression in Activated and Anergic T Lymphocytes           | 7,9E-04 | 1,6E-01  |       | CAMK4, CARD11, CD247, CD3D, CD3E, CD3G, IKBKE, LAT, NFATC2, TGFBR2, VAV1, VAV3, ZAP70                                                                                                                                                  |
| Role of Macrophages, Fibroblasts and Endothelial Cells in Rheumatoid Arthritis | 8,7E-04 | 1,05E-01 |       | C5, CAMK4, CCL5, CEBPE, FCGR3A/FCGR3B, FRZB, IKBKE, IL16, IL18, IL18RAP, IL7, IRAK3, LEF1, LTB, NFATC2, PIK3CG, PIK3R1, PIK3R5, PLCB2, PRKCB, PRKCQ, SFRP4, SOCS1, TLR3, TLR5, TLR6, TLR8, TNFSF13B, TRAF1, TRAF5, WNT10A, WNT3, WNT3A |
| G-Protein Coupled Receptor Signaling                                           | 1,0E-03 | 1,07E-01 |       | ADCY7, ADORA3, ADRB1, CAMK4, CXCR2, DRD4, GRM1, HRH2, IKBKE, P2RY12, P2RY13, P2RY14, PDE4A, PDE4D, PDE6A, PDE9A, PIK3CG, PIK3R1, PIK3R5, PLCB2, PRKCB, PTGDR, PTGER3, PTH1R, PTK2B, RASGRP1, RGS10, RGS18, SYNGAP1, VIPR2              |
| IL-12 Signaling and Production in Macrophages                                  | 1,2E-03 | 1,27E-01 |       | APOA1, CD40LG, IFNG, IKBKE, IL12RB1, IL12RB2, IL18, IL23A, IL4, IRF8, JMJD6, PIK3CG, PIK3R1, PIK3R5, PRKCB, PRKCQ, SERPINA1, STAT1, STAT4                                                                                              |
| Role of Osteoblasts, Osteoclasts and Chondrocytes in Rheumatoid Arthritis      | 1,6E-03 | 1,09E-01 |       | ACP5, BMP6, BMP7, CAMK4, CSF1R, CTSK, FRZB, IFNG, IGF1, IKBKE, IL18, IL18RAP, IL4, IL7, LEF1, NFATC2, PIK3CG, PIK3R1,                                                                                                                  |

|                                           |         |          |       |                                                                                                                                                                                                                                                                                                         |
|-------------------------------------------|---------|----------|-------|---------------------------------------------------------------------------------------------------------------------------------------------------------------------------------------------------------------------------------------------------------------------------------------------------------|
| IL-15 Signaling                           | 1,6E-03 | 1,56E-01 |       | PIK3R5, PTK2B, RUNX2, SFRP4, TRAF5, WNT10A, WNT3, WNT3A                                                                                                                                                                                                                                                 |
| Inflammasome pathway                      | 1,7E-03 | 2,61E-01 | 2,449 | FASLG, IL15RA, IL2RB, IL2RG, IL4, JAK3, LCK, PIK3CG, PIK3R1, PIK3R5, PTK2, SYK                                                                                                                                                                                                                          |
| Granzyme B Signaling                      | 1,7E-03 | 3,12E-01 | 0,000 | AIM2, CASP8, IL18, NLRC4, NLRP3, PYCARD                                                                                                                                                                                                                                                                 |
| NF-κB Signaling                           | 1,9E-03 | 1,17E-01 | 3,710 | CASP8, CYCS, ENDOG, GZMB, PRF1                                                                                                                                                                                                                                                                          |
| Fc Epsilon RI Signaling                   | 2,6E-03 | 1,28E-01 | 2,673 | CARD11, CASP8, CD40LG, IL18, IRAK3, LCK, PIK3CG, PIK3R1, PIK3R5, PRKCB, PRKCQ, TGFBR2, TLR3, TLR5, TLR6, TLR8, TNFAIP3, TNFRSF17, TNFSF13B, TRAF5, ZAP70                                                                                                                                                |
| Sperm Motility                            | 3,4E-03 | 1,21E-01 | 1,069 | BTK, GRAP2, IL4, INPP5D, LAT, LCP2, PIK3CG, PIK3R1, PIK3R5, PLA2G4F, PRKCB, PRKCQ, RAC2, SYK, VAV1, VAV3                                                                                                                                                                                                |
| Axonal Guidance Signaling                 | 4,1E-03 | 9,01E-02 |       | ATP1A4, CAMK4, CATSPER1, CATSPER2, NPPA, PDE4A, PDE4D, PLA2G4F, PLA2G7, PLAAT4, PLB1, PLCB2, PRKCB, PRKCQ, PTK2, PTK2B, PTK6                                                                                                                                                                            |
| Chemokine Signaling                       | 4,1E-03 | 1,47E-01 | 2,714 | ABLIM2, ADAM11, ADAM28, ADAM8, AOPEP, BCAR1, BMP6, BMP7, CDC42, CXCR4, GLIS1, GLIS2, IGF1, ITGA4, LRRC4C, MET, MICAL1, MMP9, NCK2, NFATC2, PIK3CG, PIK3R1, PIK3R5, PLCB2, PLXNC1, PRKCB, PRKCQ, PTK2, RAC2, RHOD, SEMA4D, SEMA6B, SLIT2, SRGAP2, TUBA3C/TUBA3D, TUBB2A, WAS, WIPF1, WNT10A, WNT3, WNT3A |
| TREM1 Signaling                           | 4,5E-03 | 1,45E-01 | 3,317 | CAMK4, CCL4, CCL5, CCR5, CXCR4, MPRIP, PIK3CG, PLCB2, PRKCB, PTK2, PTK2B                                                                                                                                                                                                                                |
| IL-2 Signaling                            | 4,8E-03 | 1,52E-01 | 2,530 | CCL3, IL18, ITGAX, NLRC3, NLRC4, NLRP3, TLR3, TLR5, TLR6, TLR8, TYROBP                                                                                                                                                                                                                                  |
| Hematopoiesis from Pluripotent Stem Cells | 5,5E-03 | 1,7E-01  |       | IL2RB, IL2RG, JAK3, LCK, PIK3CG, PIK3R1, PIK3R5, PTK2B, SOCS1, SYK                                                                                                                                                                                                                                      |
| Molecular Mechanisms of Cancer            | 5,8E-03 | 9,16E-02 |       | CD247, CD3D, CD3E, CD3G, CD8A, CD8B, IL4, IL7                                                                                                                                                                                                                                                           |
| Paxillin Signaling                        | 6,2E-03 | 1,24E-01 | 1,000 | ADCY7, ARHGEF16, AURKA, BCL2L11, BMP6, BMP7, CASP8, CDC42, CDKN2A, CHEK2, CYCS, E2F2, FANCD2, FASLG, FNBP1, HHAT, ITGA4, JAK3, LEF1, PIK3CG, PIK3R1, PIK3R5, PLCB2, PRKCB, PRKCQ, PTK2, RAC2, RASGRP1, RHOD, RHOH, SYNGAP1, TGFBR2, WNT10A, WNT3, WNT3A                                                 |
| p70S6K Signaling                          | 6,3E-03 | 1,17E-01 | 3,000 | BCAR1, CDC42, ITGA4, ITGAD, ITGAL, ITGAX, ITGB2, ITGB7, NCK2, PIK3CG, PIK3R1, PIK3R5, PTK2, PTK2B                                                                                                                                                                                                       |
| 3-phosphoinositide Biosynthesis           | 6,5E-03 | 1,04E-01 |       | BTK, CD19, CD79A, F2R, F2RL2, IL2RG, IL4, PIK3CG, PIK3R1, PIK3R5, PLCB2, PPM1J, PPP2R2B, PRKCB, PRKCQ, SYK                                                                                                                                                                                              |
|                                           |         |          |       | ACP5, CD19, CILP, DUSP13, ICOS, LCK, MET, NUDT4, PIK3CG, PIK3R1, PIK3R5, PIP4K2A, PPP1CC, PPP1R1A, PTPN22, PTPN6, PTPN7, PTPRC, PTPRH, PTPRO, TRAT1, VAV1                                                                                                                                               |

|                                                                                  |         |          |       |                                                                                                                                                                                |
|----------------------------------------------------------------------------------|---------|----------|-------|--------------------------------------------------------------------------------------------------------------------------------------------------------------------------------|
| IL-8 Signaling                                                                   | 7,2E-03 | 1,04E-01 | 3,710 | ANGPT1, CXCR2, FNBP1, IKBKE, IRAK3, ITGAX, ITGB2, MMP9, NCF2, PIK3CG, PIK3R1, PIK3R5, PLCB2, PLD4, PRKCB, PRKCQ, PTK2, PTK2B, RAC2, RHOD, RHOH                                 |
| Sphingosine-1-phosphate Signaling                                                | 7,2E-03 | 1,18E-01 | 1,069 | ADCY7, CASP8, FNBP1, NAAA, PIK3CG, PIK3R1, PIK3R5, PLCB2, PTK2, PTK2B, RHOD, RHOH, S1PR4, SMPD3, SPHK1                                                                         |
| Macropinocytosis Signaling                                                       | 7,2E-03 | 1,36E-01 | 1,414 | CDC42, CSF1R, ITGB2, ITGB7, MET, MRC1, PIK3CG, PIK3R1, PIK3R5, PRKCB, PRKCQ                                                                                                    |
| Role of PKR in Interferon Induction and Antiviral Response                       | 7,8E-03 | 1,75E-01 |       | CASP8, CYCS, IFNG, IKBKE, STAT1, TLR3, TRAF5                                                                                                                                   |
| Superpathway of Inositol Phosphate Compounds                                     | 8,7E-03 | 9,73E-02 |       | ACP5, CD19, CILP, DUSP13, ICOS, INPP5D, LCK, MET, NUDT4, PIK3CG, PIK3R1, PIK3R5, PIP4K2A, PLCB2, PLD4, PPP1CC, PPP1R1A, PTPN22, PTPN6, PTPN7, PTPRC, PTPRH, PTPRO, TRAT1, VAV1 |
| Gα12/13 Signaling                                                                | 9,5E-03 | 1,15E-01 | 2,840 | BTK, CDC42, CDH16, CDH9, F2R, F2RL2, IKBKE, LPAR2, PIK3CG, PIK3R1, PIK3R5, PTK2, PTK2B, VAV1, VAV3                                                                             |
| Eicosanoid Signaling                                                             | 1,0E-02 | 1,29E-01 | 1,633 | ALOX15B, ALOX5AP, CYSLTR1, DPEP2, LTC4S, PLA2G4F, PLA2G7, PLAAT4, PLB1, PTGDR, PTGER3                                                                                          |
| Role of JAK1, JAK2 and TYK2 in Interferon Signaling                              | 1,1E-02 | 2,08E-01 | 0,000 | CGA, IFNG, PTPN6, SOCS1, STAT1                                                                                                                                                 |
| Role of Hypercytokinemia/hyperchemokine-<br>mia in the Pathogenesis of Influenza | 1,1E-02 | 1,63E-01 |       | CCL3, CCL4, CCL5, CCR5, CXCL10, IFNG, IL18                                                                                                                                     |
| NF-κB Activation by Viruses                                                      | 1,2E-02 | 1,26E-01 | 3,162 | CCR5, IKBKE, ITGA4, ITGAL, ITGB2, LCK, PIK3CG, PIK3R1, PIK3R5, PRKCB, PRKCQ                                                                                                    |
| Actin Nucleation by ARP-WASP Complex                                             | 1,5E-02 | 1,43E-01 | 0,816 | CDC42, FNBP1, ITGA4, NCK2, RHOD, RHOH, WAS, WIPF1                                                                                                                              |
| Neuroprotective Role of THOP1 in Alzheimer's Disease                             | 1,7E-02 | 1,52E-01 |       | HLA-A, HLA-E, HLA-F, IFNG, KNG1, MMP9, PNOC                                                                                                                                    |
| UVA-Induced MAPK Signaling                                                       | 1,7E-02 | 1,17E-01 | 2,714 | CYCS, PARP10, PARP15, PARP4, PARP8, PIK3CG, PIK3R1, PIK3R5, PLCB2, SMPD3, STAT1, ZC3HAV1                                                                                       |
| FcγRIIB Signaling in B Lymphocytes                                               | 1,7E-02 | 1,4E-01  | 1,414 | BLNK, BTK, CD79A, INPP5D, PIK3CG, PIK3R1, PIK3R5, SYK                                                                                                                          |
| Reelin Signaling in Neurons                                                      | 1,8E-02 | 1,2E-01  |       | ARHGEF16, BLK, FGR, ITGA4, ITGAL, ITGB2, LCK, MAP4K1, PIK3CG, PIK3R1, PIK3R5                                                                                                   |
| Lymphotoxin β Receptor Signaling                                                 | 1,9E-02 | 1,3E-01  | 2,333 | CYCS, IKBKE, LTB, PIK3CG, PIK3R1, PIK3R5, TNFSF14, TRAF1, TRAF5                                                                                                                |
| IL-15 Production                                                                 | 1,9E-02 | 1,85E-01 |       | JAK3, PTK2, PTK2B, PTK6, STAT1                                                                                                                                                 |
| Integrin Signaling                                                               | 1,9E-02 | 9,55E-02 | 2,524 | BCAR1, CDC42, FNBP1, ITGA4, ITGAD, ITGAL, ITGAX, ITGB2, ITGB7, MPRIP, NCK2, PIK3CG, PIK3R1, PIK3R5, PTK2, RAC2, RHOD, RHOH, TSPAN5, WAS, WIPF1                                 |
| Gαq Signaling                                                                    | 1,9E-02 | 1,01E-01 | 3,153 | BTK, CAMK4, FNBP1, GRM1, IKBKE, NFATC2, PIK3CG, PIK3R1, PIK3R5, PLCB2, PLD4, PRKCB, PRKCQ, PTK2B, RGS18, RHOD, RHOH                                                            |

|                                                                                                    |         |          |       |                                                                                                                                                       |
|----------------------------------------------------------------------------------------------------|---------|----------|-------|-------------------------------------------------------------------------------------------------------------------------------------------------------|
| Acute Myeloid Leukemia Signaling                                                                   | 2,1E-02 | 1,17E-01 | 1,414 | CSF1R, CSF2RA, FLT3, FLT3LG, IDH2, LEF1, PIK3CG, PIK3R1, PIK3R5, PIM1, PIM2                                                                           |
| April Mediated Signaling                                                                           | 2,2E-02 | 1,58E-01 | 2,449 | IKBKE, NFATC2, TNFRSF17, TNFSF13, TRAF1, TRAF5                                                                                                        |
| Glioma Invasiveness Signaling                                                                      | 2,2E-02 | 1,27E-01 | 1,667 | F2R, FNBP1, MMP9, PIK3CG, PIK3R1, PIK3R5, PTK2, RHOD, RHOH                                                                                            |
| ILK Signaling                                                                                      | 2,3E-02 | 9,6E-02  | 1,213 | CDC42, FBLIM1, FERMT2, FNBP1, ITGB2, ITGB7, LEF1, MMP9, MYH6, NCK2, PIK3CG, PIK3R1, PIK3R5, PPM1J, PPP2R2B, PTK2, RHOD, RHOH, TMSB10/TMSB4X           |
| Virus Entry via Endocytic Pathways                                                                 | 2,4E-02 | 1,11E-01 |       | CDC42, HLA-A, ITGA4, ITGAL, ITGB2, ITGB7, PIK3CG, PIK3R1, PIK3R5, PRKCB, PRKCQ, RAC2                                                                  |
| PTEN Signaling                                                                                     | 2,5E-02 | 1,07E-01 | 0,000 | BCAR1, BCL2L11, CDC42, FASLG, IKBKE, INPP5D, ITGA4, PIK3CG, PIK3R1, PIK3R5, PTK2, RAC2, TGFBR2                                                        |
| cAMP-mediated signaling                                                                            | 2,5E-02 | 9,25E-02 | 0,000 | ADCY7, ADORA3, ADRB1, AKAP10, CAMK4, CXCR2, DRD4, HRH2, P2RY12, P2RY13, P2RY14, PDE4A, PDE4D, PDE6A, PDE9A, PTGDR, PTGER3, PTH1R, RGS10, RGS18, VIPR2 |
| Caveolar-mediated Endocytosis Signaling                                                            | 2,6E-02 | 1,23E-01 |       | CD48, DYRK3, HLA-A, ITGA4, ITGAD, ITGAL, ITGAX, ITGB2, ITGB7                                                                                          |
| Ephrin A Signaling                                                                                 | 2,8E-02 | 1,29E-01 |       | BCAR1, CDC42, PIK3CG, PIK3R1, PIK3R5, PTK2, VAV1, VAV3                                                                                                |
| B Cell Activating Factor Signaling                                                                 | 2,8E-02 | 1,5E-01  | 2,449 | IKBKE, NFATC2, TNFRSF17, TNFSF13B, TRAF1, TRAF5                                                                                                       |
| Toll-like Receptor Signaling                                                                       | 2,8E-02 | 1,22E-01 | 1,342 | IL18, IRAK3, TLR3, TLR5, TLR6, TLR8, TNFAIP3, TRAF1, UBD                                                                                              |
| Retinoic acid Mediated Apoptosis Signaling                                                         | 3,2E-02 | 1,25E-01 | 2,121 | CASP8, CYCS, IFNG, PARP10, PARP15, PARP4, PARP8, ZC3HAV1                                                                                              |
| CD40 Signaling                                                                                     | 3,8E-02 | 1,15E-01 | 2,333 | CD40LG, IKBKE, JAK3, PIK3CG, PIK3R1, PIK3R5, TNFAIP3, TRAF1, TRAF5                                                                                    |
| Colorectal Cancer Metastasis Signaling                                                             | 4,0E-02 | 8,73E-02 | 2,558 | ADCY7, FNBP1, IFNG, JAK3, LEF1, MMP25, MMP9, PIK3CG, PIK3R1, PIK3R5, PTGER3, RHOD, RHOH, STAT1, TGFBR2, TLR3, TLR5, TLR6, TLR8, WNT10A, WNT3, WNT3A   |
| Death Receptor Signaling                                                                           | 4,2E-02 | 1,09E-01 | 2,530 | ARHGDI1, CASP8, CYCS, FASLG, IKBKE, PARP10, PARP15, PARP4, PARP8, ZC3HAV1                                                                             |
| Differential Regulation of Cytokine Production in Intestinal Epithelial Cells by IL-17A and IL-17F | 4,3E-02 | 1,74E-01 |       | CCL3, CCL4, CCL5, IFNG                                                                                                                                |
| Regulation of Actin-based Motility by Rho                                                          | 4,5E-02 | 1,08E-01 | 1,897 | CDC42, FNBP1, ITGA4, MPRIP, PIP4K2A, RAC2, RHOD, RHOH, WAS, WIPF1                                                                                     |
| IL-9 Signaling                                                                                     | 4,6E-02 | 1,33E-01 | 2,449 | IL2RG, JAK3, PIK3CG, PIK3R1, PIK3R5, STAT1                                                                                                            |
| Pancreatic Adenocarcinoma Signaling                                                                | 4,8E-02 | 0,1      | 3,000 | BRCA2, CDC42, CDKN2A, E2F2, JAK3, MMP9, PIK3CG, PIK3R1, PIK3R5, PLD4, STAT1, TGFBR2                                                                   |
| Myc Mediated Apoptosis Signaling                                                                   | 5,1E-02 | 1,14E-01 |       | CASP8, CDKN2A, CYCS, FASLG, IGF1, PIK3CG, PIK3R1, PIK3R5                                                                                              |

|                                                                                                       |         |          |        |                                                                                                                                                                                                                         |
|-------------------------------------------------------------------------------------------------------|---------|----------|--------|-------------------------------------------------------------------------------------------------------------------------------------------------------------------------------------------------------------------------|
| Actin Cytoskeleton Signaling                                                                          | 5,4E-02 | 8,62E-02 | 2,357  | BCAR1, CDC42, F2R, FGD3, ITGA4, KNG1, MATK, MPRIP, MYH6, NCKAP1L, PIK3CG, PIK3R1, PIK3R5, PIP4K2A, PTK2, RAC2, TMSB10/TMSB4X, VAV1, VAV3, WAS                                                                           |
| iNOS Signaling                                                                                        | 5,5E-02 | 1,28E-01 | 2,236  | CAMK4, IFNG, IKBKE, IRAK3, JAK3, STAT1                                                                                                                                                                                  |
| Glioblastoma Multiforme Signaling                                                                     | 5,8E-02 | 9,15E-02 | 1,069  | CDC42, CDKN2A, E2F2, FNBP1, IGF1, LEF1, PIK3CG, PIK3R1, PIK3R5, PLCB2, RHOD, RHOH, WNT10A, WNT3, WNT3A                                                                                                                  |
| Growth Hormone Signaling                                                                              | 6,0E-02 | 1,06E-01 | 1,414  | IGF1, PIK3CG, PIK3R1, PIK3R5, PRKCB, PRKCQ, PTPN6, SOCS1, STAT1                                                                                                                                                         |
| Basal Cell Carcinoma Signaling                                                                        | 6,2E-02 | 1,1E-01  | 0,000  | BMP6, BMP7, GLIS1, GLIS2, LEF1, WNT10A, WNT3, WNT3A                                                                                                                                                                     |
| D-myo-inositol-5-phosphate Metabolism                                                                 | 6,8E-02 | 8,93E-02 |        | ACP5, CILP, DUSP13, NUDT4, PIP4K2A, PLCB2, PLD4, PPP1CC, PPP1R1A, PTPN22, PTPN6, PTPN7, PTPRC, PTPRH, PTPRO                                                                                                             |
| fMLP Signaling in Neutrophils                                                                         | 7,1E-02 | 9,38E-02 | 2,887  | CAMK4, CDC42, NCF1, NCF2, NFATC2, PIK3CG, PIK3R1, PIK3R5, PLCB2, PRKCB, PRKCQ, WAS                                                                                                                                      |
| HER-2 Signaling in Breast Cancer                                                                      | 7,1E-02 | 1,02E-01 |        | CDC42, ITGB2, ITGB7, PARD6B, PIK3CG, PIK3R1, PIK3R5, PRKCB, PRKCQ                                                                                                                                                       |
| Protein Kinase A Signaling                                                                            | 7,4E-02 | 7,67E-02 | 0,000  | ADCY7, AKAP10, CAMK4, CDKN3, DUSP18, EBI3, HHAT, LEF1, NFATC2, PDE4A, PDE4D, PDE6A, PDE9A, PLCB2, PPP1CC, PRKCB, PRKCQ, PTK2, PTK2B, PTPN18, PTPN22, PTPN6, PTPN7, PTPRC, PTPRH, PTPRO, PTPRU, PYGM, RYR1, TGFB2, TNNI2 |
| Acute Phase Response Signaling                                                                        | 7,6E-02 | 8,77E-02 | 1,000  | APOA1, C1S, C2, C5, CFB, CP, HAMP, HMOX2, IKBKE, IL18, PIK3CG, PIK3R1, RBP5, SERPINA1, SOCS1                                                                                                                            |
| Cardiac $\beta$ -adrenergic Signaling                                                                 | 8,1E-02 | 8,97E-02 | -0,577 | ADCY7, ADRB1, AKAP10, ATP2A2, ATP2A3, PDE4A, PDE4D, PDE6A, PDE9A, PPM1J, PPP1CC, PPP1R1A, PPP2R2B                                                                                                                       |
| Differential Regulation of Cytokine Production in Macrophages and T Helper Cells by IL-17A and IL-17F | 8,5E-02 | 1,67E-01 |        | CCL3, CCL4, CCL5                                                                                                                                                                                                        |
| Tryptophan Degradation to 2-amino-3-carboxymuconate Semialdehyde $\gamma$ -glutamyl Cycle             | 8,5E-02 | 1,67E-01 |        | HAAO, IDO2, KMO                                                                                                                                                                                                         |
| Semaphorin Signaling in Neurons                                                                       | 8,7E-02 | 1,38E-01 |        | ANPEP, CHAC2, GGACT, GGTL1                                                                                                                                                                                              |
| Regulation of the Epithelial-Mesenchymal Transition Pathway                                           | 8,7E-02 | 1,13E-01 |        | FNBP1, MET, PTK2, RHOD, RHOH, SEMA4D                                                                                                                                                                                    |
| Factors Promoting Cardiogenesis in Vertebrates                                                        | 8,7E-02 | 8,47E-02 |        | CLDN3, JAK3, LEF1, LOX, MET, MMP9, NOTCH2, PARD6B, PIK3CG, PIK3R1, PIK3R5, PYGO1, TGFB2, WNT10A, WNT3, WNT3A                                                                                                            |
| Angiopoietin Signaling                                                                                | 8,9E-02 | 9,78E-02 |        | BMP6, BMP7, GATA4, LEF1, NPPA, PRKCB, PRKCQ, TGFB2, WNT3                                                                                                                                                                |
|                                                                                                       | 8,9E-02 | 1,01E-01 | -0,447 | ANGPT1, ANGPTL1, DOK2, IKBKE, PIK3CG, PIK3R1, PIK3R5, PTK2                                                                                                                                                              |

|                                                         |         |          |        |                                                                                                                                                      |
|---------------------------------------------------------|---------|----------|--------|------------------------------------------------------------------------------------------------------------------------------------------------------|
| Cholecystokinin/Gastrin-mediated Signaling              | 9,1E-02 | 9,43E-02 | 1,265  | BCAR1, FNBP1, IL18, PLCB2, PRKCB, PRKCQ, PTK2, PTK2B, RHOD, RHOH                                                                                     |
| Unfolded protein response                               | 9,3E-02 | 1,11E-01 |        | CEBPE, EDEM1, ERN1, HSPA6, PDIA2, SREBF1                                                                                                             |
| Intrinsic Prothrombin Activation Pathway                | 9,5E-02 | 1,33E-01 |        | COL1A2, COL3A1, F13A1, KNG1                                                                                                                          |
| Thrombin Signaling                                      | 1,1E-01 | 8,13E-02 | 1,698  | ADCY7, ARHGEF16, CAMK4, F2R, F2RL2, FNBP1, GATA4, MPRIP, PIK3CG, PIK3R1, PIK3R5, PLCB2, PRKCB, PRKCQ, PTK2, RHOD, RHOH                               |
| Cardiomyocyte Differentiation via BMP Receptors         | 1,1E-01 | 1,5E-01  |        | BMP7, GATA4, NPPA                                                                                                                                    |
| IL-3 Signaling                                          | 1,1E-01 | 9,64E-02 | 1,414  | INPP5D, PIK3CG, PIK3R1, PIK3R5, PRKCB, PRKCQ, PTPN6, STAT1                                                                                           |
| JAK/Stat Signaling                                      | 1,1E-01 | 9,64E-02 | 1,414  | JAK3, PIK3CG, PIK3R1, PIK3R5, PTPN6, SOCS1, STAT1, STAT4                                                                                             |
| Netrin Signaling                                        | 1,1E-01 | 1,14E-01 |        | ABLIM2, NCK2, NFATC2, RAC2, RYR1                                                                                                                     |
| Ceramide Signaling                                      | 1,1E-01 | 9,28E-02 | -1,414 | CYCS, PIK3CG, PIK3R1, PIK3R5, PPM1J, PPP2R2B, S1PR4, SMPD3, SPHK1                                                                                    |
| Agrin Interactions at Neuromuscular Junction            | 1,1E-01 | 0,1      | 0,816  | CDC42, ITGA4, ITGAL, ITGB2, PKLR, PTK2, RAC2                                                                                                         |
| FLT3 Signaling in Hematopoietic Progenitor Cells        | 1,2E-01 | 9,41E-02 | 2,121  | FLT3, FLT3LG, INPP5D, PIK3CG, PIK3R1, PIK3R5, STAT1, STAT4                                                                                           |
| Wnt/ $\beta$ -catenin Signaling                         | 1,2E-01 | 8,24E-02 | -0,632 | CDKN2A, FRAT1, FRZB, LEF1, MAP4K1, PPM1J, PPP2R2B, SFRP4, SOX10, TGFBR2, UBD, WNT10A, WNT3, WNT3A                                                    |
| Prolactin Signaling                                     | 1,3E-01 | 9,3E-02  | 2,121  | PIK3CG, PIK3R1, PIK3R5, PRKCB, PRKCQ, SOCS1, STAT1, TCF7                                                                                             |
| Renin-Angiotensin Signaling                             | 1,3E-01 | 8,53E-02 | 2,530  | ADCY7, CCL5, PIK3CG, PIK3R1, PIK3R5, PRKCB, PRKCQ, PTK2, PTK2B, PTPN6, STAT1                                                                         |
| Small Cell Lung Cancer Signaling                        | 1,3E-01 | 9,2E-02  |        | CYCS, IKBKE, PIK3CG, PIK3R1, PIK3R5, PTK2, TRAF1, TRAF5                                                                                              |
| TWEAK Signaling                                         | 1,3E-01 | 1,18E-01 | 0,000  | CASP8, CYCS, IKBKE, TRAF1                                                                                                                            |
| TGF- $\beta$ Signaling                                  | 1,3E-01 | 9,2E-02  | 1,342  | BMP7, CDC42, MAP4K1, RUNX2, RUNX3, TFE3, TGFBR2, VDR                                                                                                 |
| Glucocorticoid Receptor Signaling                       | 1,4E-01 | 7,51E-02 |        | BAG1, CCL3, CCL5, CD247, CD3D, CD3E, CD3G, ERCC2, FKBP4, HSPA6, IFNG, IKBKE, IL4, JAK3, NFATC2, NPPA, PIK3CG, PIK3R1, PIK3R5, STAT1, TGFBR2, TSC22D3 |
| Induction of Apoptosis by HIV1                          | 1,4E-01 | 0,1      | 1,633  | CASP8, CXCR4, CYCS, FASLG, IKBKE, TRAF1                                                                                                              |
| MSP-ROn Signaling Pathway                               | 1,4E-01 | 0,1      |        | CCR2, IFNG, ITGB2, PIK3CG, PIK3R1, PIK3R5                                                                                                            |
| GM-CSF Signaling                                        | 1,4E-01 | 9,46E-02 | 1,633  | CSF2RA, PIK3CG, PIK3R1, PIK3R5, PIM1, PRKCB, STAT1                                                                                                   |
| Coagulation System                                      | 1,4E-01 | 1,14E-01 | 1,000  | F13A1, F2R, KNG1, SERPINA1                                                                                                                           |
| Role of MAPK Signaling in the Pathogenesis of Influenza | 1,5E-01 | 9,33E-02 |        | CCL5, CXCL10, IFNG, PLA2G4F, PLA2G7, PLAAT4, PLB1                                                                                                    |
| Ephrin B Signaling                                      | 1,5E-01 | 9,33E-02 | 0,816  | CDC42, CXCR4, NCK2, PTK2, RAC2, VAV1, VAV3                                                                                                           |
| Germ Cell-Sertoli Cell Junction Signaling               | 1,5E-01 | 7,95E-02 |        | BCAR1, CDC42, FNBP1, PIK3CG, PIK3R1, PIK3R5, PTK2, RAB8B, RAC2, RHOD, RHOH, TGFBR2, TUBA3C/TUBA3D, TUBB2A                                            |

|                                                              |         |          |       |                                                                                                                                 |
|--------------------------------------------------------------|---------|----------|-------|---------------------------------------------------------------------------------------------------------------------------------|
| Gustation Pathway                                            | 1,5E-01 | 8,33E-02 |       | ADCY7, P2RX3, P2RY12, P2RY13, P2RY14, P2RY2, PDE4A, PDE4D, PDE6A, PDE9A, PLCB2                                                  |
| Neuropathic Pain Signaling In Dorsal Horn Neurons            | 1,5E-01 | 8,47E-02 | 2,530 | CAMK4, GRM1, KCNN2, KCNN4, PIK3CG, PIK3R1, PIK3R5, PLCB2, PRKCB, PRKCQ                                                          |
| HGF Signaling                                                | 1,5E-01 | 8,47E-02 | 0,632 | CDC42, CDKN2A, ITGA4, MET, PIK3CG, PIK3R1, PIK3R5, PRKCB, PRKCQ, PTK2                                                           |
| Glioma Signaling                                             | 1,5E-01 | 8,47E-02 | 2,333 | CAMK4, CDKN2A, E2F2, IDH2, IGF1, PIK3CG, PIK3R1, PIK3R5, PRKCB, PRKCQ                                                           |
| Activation of IRF by Cytosolic Pattern Recognition Receptors | 1,5E-01 | 9,68E-02 | 1,633 | DHX58, IFIH1, IFIT2, IKBKE, STAT1, ZBP1                                                                                         |
| Hematopoiesis from Multipotent Stem Cells                    | 1,5E-01 | 1,67E-01 |       | IL4, IL7                                                                                                                        |
| TNFR1 Signaling                                              | 1,6E-01 | 1,02E-01 | 0,000 | CASP8, CDC42, CYCS, IKBKE, TNFAIP3                                                                                              |
| Human Embryonic Stem Cell Pluripotency                       | 1,6E-01 | 8,11E-02 |       | BMP6, BMP7, LEF1, PIK3CG, PIK3R1, PIK3R5, S1PR4, SPHK1, TGFB2, WNT10A, WNT3, WNT3A                                              |
| D-myo-inositol (1,4,5,6)-Tetrakisphosphate Biosynthesis      | 1,6E-01 | 8,05E-02 |       | ACP5, CILP, DUSP13, NUDT4, PPP1CC, PPP1R1A, PTPN22, PTPN6, PTPN7, PTPRC, PTPRH, PTPRO                                           |
| D-myo-inositol (3,4,5,6)-tetrakisphosphate Biosynthesis      | 1,6E-01 | 8,05E-02 |       | ACP5, CILP, DUSP13, NUDT4, PPP1CC, PPP1R1A, PTPN22, PTPN6, PTPN7, PTPRC, PTPRH, PTPRO                                           |
| 3-phosphoinositide Degradation                               | 1,6E-01 | 7,93E-02 |       | ACP5, CILP, DUSP13, INPP5D, NUDT4, PPP1CC, PPP1R1A, PTPN22, PTPN6, PTPN7, PTPRC, PTPRH, PTPRO                                   |
| Breast Cancer Regulation by Stathmin1                        | 1,6E-01 | 7,66E-02 |       | ADCY7, ARHGEF16, CAMK4, CDC42, E2F2, PIK3CG, PIK3R1, PIK3R5, PLCB2, PPM1J, PPP1CC, PPP2R2B, PRKCB, PRKCQ, TUBA3C/TUBA3D, TUBB2A |
| Role of BRCA1 in DNA Damage Response                         | 1,7E-01 | 8,97E-02 | 0,000 | BRCA2, CHEK2, E2F2, FANCA, FANCD2, IFNG, STAT1                                                                                  |
| Role of PI3K/AKT Signaling in the Pathogenesis of Influenza  | 1,7E-01 | 8,97E-02 | 2,449 | CCL5, CCR5, IFNG, PIK3CG, PIK3R1, PIK3R5, PLAC8                                                                                 |
| Role of NANOG in Mammalian Embryonic Stem Cell Pluripotency  | 1,8E-01 | 8,2E-02  | 2,000 | BMP6, BMP7, GATA4, JAK3, PIK3CG, PIK3R1, PIK3R5, WNT10A, WNT3, WNT3A                                                            |
| IL-17A Signaling in Gastric Cells                            | 1,8E-01 | 1,2E-01  |       | CCL5, CXCL10, CXCL11                                                                                                            |
| Leukotriene Biosynthesis                                     | 1,8E-01 | 1,2E-01  |       | DPEP2, GGTL1, LTC4S                                                                                                             |
| VDR/RXR Activation                                           | 1,8E-01 | 8,86E-02 | 0,378 | CCL5, CXCL10, IFNG, PRKCB, PRKCQ, RUNX2, VDR                                                                                    |
| GDNF Family Ligand-Receptor Interactions                     | 1,8E-01 | 8,86E-02 | 1,890 | CDC42, DOK2, DOK3, GFRA2, PIK3CG, PIK3R1, PIK3R5                                                                                |
| CD27 Signaling in Lymphocytes                                | 1,9E-01 | 9,62E-02 | 1,342 | CASP8, CD27, CYCS, IKBKE, TRAF5                                                                                                 |
| Lipid Antigen Presentation by CD1                            | 1,9E-01 | 1,15E-01 |       | CD1B, CD1C, CD3E                                                                                                                |
| Synaptic Long Term Depression                                | 2,0E-01 | 7,74E-02 | 2,309 | GRM1, IGF1, PLA2G4F, PLA2G7, PLAAT4, PLB1, PLCB2, PPM1J, PPP2R2B, PRKCB, PRKCQ, RYR1                                            |
| DNA Double-Strand Break Repair by Homologous Recombination   | 2,0E-01 | 1,43E-01 |       | BRCA2, LIG1                                                                                                                     |
| Calcium Transport I                                          | 2,0E-01 | 1,43E-01 |       | ATP2A2, ATP2A3                                                                                                                  |

|                                                          |         |          |        |                                                                                                |
|----------------------------------------------------------|---------|----------|--------|------------------------------------------------------------------------------------------------|
| Sphingomyelin Metabolism                                 | 2,0E-01 | 1,43E-01 |        | SGMS2, SMPD3                                                                                   |
| PDGF Signaling                                           | 2,0E-01 | 8,33E-02 | 2,121  | INPP5D, JAK3, PIK3CG, PIK3R1, PIK3R5, PRKCB, SPHK1, STAT1                                      |
| Erythropoietin Signaling                                 | 2,0E-01 | 8,54E-02 |        | PIK3CG, PIK3R1, PIK3R5, PRKCB, PRKCQ, PTPN6, SOCS1                                             |
| Nitric Oxide Signaling in the Cardiovascular System      | 2,0E-01 | 7,94E-02 | 1,265  | ADRB1, ATP2A2, ATP2A3, CAMK4, KNG1, PIK3CG, PIK3R1, PIK3R5, PRKCB, PRKCQ                       |
| CXCR4 Signaling                                          | 2,1E-01 | 7,51E-02 | 1,387  | ADCY7, BCAR1, CXCR4, FNBP1, PIK3CG, PIK3R1, PIK3R5, PLCB2, PRKCB, PRKCQ, PTK2, RHOD, RHOH      |
| ErbB Signaling                                           | 2,1E-01 | 8,16E-02 |        | CDC42, EREG, NCK2, PIK3CG, PIK3R1, PIK3R5, PRKCB, PRKCQ                                        |
| LXR/RXR Activation                                       | 2,1E-01 | 7,81E-02 | -0,707 | ABCG1, APOA1, IL18, IL18RAP, KNG1, MLXIPL, MMP9, SERPINA1, SREBF1, TLR3                        |
| Thrombopoietin Signaling                                 | 2,1E-01 | 8,7E-02  | 2,449  | PIK3CG, PIK3R1, PIK3R5, PRKCB, PRKCQ, STAT1                                                    |
| Role of CHK Proteins in Cell Cycle Checkpoint Control    | 2,2E-01 | 9,09E-02 | -1,342 | CHEK2, E2F2, PPM1J, PPP2R2B, RAD1                                                              |
| Hepatic Cholestasis                                      | 2,2E-01 | 7,47E-02 |        | ABCC3, ADCY7, IFNG, IKBKE, IL18, IL18RAP, IL4, IRAK3, PRKCB, PRKCQ, SLC10A2, SREBF1, TJP2      |
| PEDF Signaling                                           | 2,2E-01 | 8,33E-02 | 2,646  | CASP8, FASLG, IKBKE, PIK3CG, PIK3R1, PIK3R5, TCF7                                              |
| Dopamine-DARPP32 Feedback in cAMP Signaling              | 2,3E-01 | 7,39E-02 | 2,530  | ADCY7, ATP2A2, ATP2A3, CAMK4, DRD4, KCNJ15, KCNJ5, PLCB2, PPM1J, PPP1CC, PPP2R2B, PRKCB, PRKCQ |
| Ovarian Cancer Signaling                                 | 2,3E-01 | 7,53E-02 |        | BRCA2, CDKN2A, CGA, LEF1, MMP9, PIK3CG, PIK3R1, PIK3R5, WNT10A, WNT3, WNT3A                    |
| LPS-stimulated MAPK Signaling                            | 2,4E-01 | 8,14E-02 | 1,890  | CDC42, IKBKE, PIK3CG, PIK3R1, PIK3R5, PRKCB, PRKCQ                                             |
| TNFR2 Signaling                                          | 2,4E-01 | 1,03E-01 |        | IKBKE, TNFAIP3, TRAF1                                                                          |
| Role of RIG1-like Receptors in Antiviral Innate Immunity | 2,4E-01 | 9,3E-02  | 1,000  | CASP8, DHX58, IFIH1, IKBKE                                                                     |
| Role of p14/p19ARF in Tumor Suppression                  | 2,4E-01 | 9,3E-02  | -1,000 | CDKN2A, PIK3CG, PIK3R1, PIK3R5                                                                 |
| Phospholipases                                           | 2,4E-01 | 8,33E-02 |        | PLA2G4F, PLA2G7, PLAAT4, PLB1, PLCB2, PLD4                                                     |
| RANK Signaling in Osteoclasts                            | 2,5E-01 | 7,84E-02 | 2,646  | CAMK4, IKBKE, NFATC2, PIK3CG, PIK3R1, PIK3R5, PTK2B, TRAF5                                     |
| HMGB1 Signaling                                          | 2,5E-01 | 7,52E-02 | 1,897  | CDC42, FNBP1, IFNG, IL18, IL4, PIK3CG, PIK3R1, PIK3R5, RHOD, RHOH                              |
| PAK Signaling                                            | 2,5E-01 | 7,77E-02 | 1,414  | CDC42, ITGA4, NCK2, PIK3CG, PIK3R1, PIK3R5, PTK2, PTK2B                                        |
| Airway Inflammation in Asthma                            | 2,6E-01 | 0,2      |        | IL4                                                                                            |
| Anandamide Degradation                                   | 2,6E-01 | 0,2      |        | FAAH                                                                                           |
| Chronic Myeloid Leukemia Signaling                       | 2,6E-01 | 7,69E-02 |        | CDKN2A, E2F2, HDAC10, IKBKE, PIK3CG, PIK3R1, PIK3R5, TGFBR2                                    |
| UDP-N-acetyl-D-glucosamine Biosynthesis II               | 2,6E-01 | 1,18E-01 |        | FMO3, UAP1                                                                                     |
| Apoptosis Signaling                                      | 2,6E-01 | 7,87E-02 | -0,378 | BCL2L11, CASP8, CYCS, ENDOG, FASLG, IKBKE, PRKCQ                                               |

|                                                 |         |          |        |                                                                                                                        |
|-------------------------------------------------|---------|----------|--------|------------------------------------------------------------------------------------------------------------------------|
| Rac Signaling                                   | 2,7E-01 | 7,5E-02  | 1,667  | CDC42, ITGA4, NCF2, PIK3CG, PIK3R1, PIK3R5, PIP4K2A, PTK2, PTK2B                                                       |
| 4-1BB Signaling in T Lymphocytes                | 2,7E-01 | 9,68E-02 |        | IKBKE, TNFRSF9, TRAF1                                                                                                  |
| SAPK/JNK Signaling                              | 2,7E-01 | 7,62E-02 | 2,121  | CDC42, LCK, MAP4K1, PIK3CG, PIK3R1, PIK3R5, RAC2, SH2D2A                                                               |
| eNOS Signaling                                  | 2,8E-01 | 7,14E-02 | 2,111  | ADCY7, AQP7, CAMK4, CASP8, HSPA6, KNG1, LPAR2, PIK3CG, PIK3R1, PIK3R5, PRKCB, PRKCQ                                    |
| FXR/RXR Activation                              | 2,8E-01 | 7,3E-02  |        | APOA1, FBP1, IL18, KNG1, MLXIPL, PKLR, SDC1, SERPINA1, SLC10A2, SREBF1                                                 |
| tRNA Splicing                                   | 2,8E-01 | 8,7E-02  |        | PDE4A, PDE4D, PDE6A, PDE9A                                                                                             |
| Signaling by Rho Family GTPases                 | 2,9E-01 | 6,83E-02 | 0,728  | ARHGEF16, CDC42, CDH16, CDH9, FNBP1, ITGA4, NCF2, PIK3CG, PIK3R1, PIK3R5, PIP4K2A, PTK2, PTK2B, RHOD, RHOH, WAS, WIPF1 |
| Gai Signaling                                   | 2,9E-01 | 7,32E-02 | 1,000  | ADCY7, ADORA3, CXCR2, DRD4, P2RY12, P2RY13, P2RY14, PTGER3, RGS10                                                      |
| Role of Tissue Factor in Cancer                 | 3,0E-01 | 7,26E-02 |        | BLK, CDC42, FGR, LCK, PDIA2, PIK3CG, PIK3R1, PIK3R5, PTK2B                                                             |
| ERK/MAPK Signaling                              | 3,0E-01 | 6,9E-02  | 1,604  | BCAR1, ITGA4, PIK3CG, PIK3R1, PIK3R5, PLA2G4F, PPM1J, PPP1CC, PPP2R2B, PRKCB, PTK2, PTK2B, RAC2, STAT1                 |
| Alanine Degradation III                         | 3,0E-01 | 1,67E-01 |        | GPT                                                                                                                    |
| Alanine Biosynthesis II                         | 3,0E-01 | 1,67E-01 |        | GPT                                                                                                                    |
| Antioxidant Action of Vitamin C                 | 3,0E-01 | 7,34E-02 | -2,121 | CSF2RA, IKBKE, PLA2G4F, PLA2G7, PLAAT4, PLB1, PLCB2, PLD4                                                              |
| VEGF Signaling                                  | 3,0E-01 | 7,34E-02 | 0,707  | PIK3CG, PIK3R1, PIK3R5, PRKCB, PTK2, PTK2B, PTPN6, SH2D2A                                                              |
| mTOR Signaling                                  | 3,1E-01 | 6,83E-02 | 2,138  | AKT1S1, DDIT4, FNBP1, PIK3CG, PIK3R1, PIK3R5, PLD4, PPM1J, PPP2R2B, PRKCB, PRKCQ, RHEB, RHOD, RHOH                     |
| Role of JAK2 in Hormone-like Cytokine Signaling | 3,2E-01 | 8,82E-02 |        | PTPN6, SOCS1, STAT1                                                                                                    |
| NAD biosynthesis II (from tryptophan)           | 3,2E-01 | 8,82E-02 |        | HAAO, IDO2, KMO                                                                                                        |
| Telomerase Signaling                            | 3,2E-01 | 7,21E-02 | 1,890  | HDAC10, IL2RB, IL2RG, PIK3CG, PIK3R1, PIK3R5, PPM1J, PPP2R2B                                                           |
| Cellular Effects of Sildenafil (Viagra)         | 3,3E-01 | 6,99E-02 |        | ADCY7, CAMK4, KCNN2, KCNN4, MPRIP, MYH6, NPPA, PDE4A, PDE4D, PLCB2                                                     |
| Granzyme A Signaling                            | 3,3E-01 | 0,1      |        | GZMA, PRF1                                                                                                             |
| nNOS Signaling in Skeletal Muscle Cells         | 3,3E-01 | 0,1      |        | CAMK4, RYR1                                                                                                            |
| Cell Cycle Regulation by BTG Family Proteins    | 3,4E-01 | 8,57E-02 |        | E2F2, PPM1J, PPP2R2B                                                                                                   |
| PI3K/AKT Signaling                              | 3,4E-01 | 6,98E-02 | 0,333  | IKBKE, INPP5D, ITGA4, JAK3, PIK3CG, PIK3R1, PPM1J, PPP2R2B, RHEB                                                       |
| Mitotic Roles of Polo-Like Kinase               | 3,4E-01 | 7,58E-02 |        | CHEK2, KIF11, PLK2, PPM1J, PPP2R2B                                                                                     |

|                                                                   |         |          |       |                                                                                                                |
|-------------------------------------------------------------------|---------|----------|-------|----------------------------------------------------------------------------------------------------------------|
| UVB-Induced MAPK Signaling                                        | 3,4E-01 | 7,58E-02 |       | PIK3CG, PIK3R1, PIK3R5, PRKCB, PRKCQ                                                                           |
| Spermine Biosynthesis                                             | 3,4E-01 | 1,43E-01 |       | AMD1                                                                                                           |
| Choline Degradation I                                             | 3,4E-01 | 1,43E-01 |       | CHDH                                                                                                           |
| Spermidine Biosynthesis I                                         | 3,4E-01 | 1,43E-01 |       | AMD1                                                                                                           |
| Interferon Signaling                                              | 3,5E-01 | 8,33E-02 |       | IFNG, SOCS1, STAT1                                                                                             |
| RhoGDI Signaling                                                  | 3,5E-01 | 6,7E-02  | 0,000 | ARHGAP4, ARHGAP9, ARHGDIB, ARHGEF16, CDC42, CDH16, CDH9, FNBP1, ITGA4, PIP4K2A, RHOD, RHOH                     |
| Renal Cell Carcinoma Signaling                                    | 3,6E-01 | 7,23E-02 | 0,447 | CDC42, MET, PIK3CG, PIK3R1, PIK3R5, UBD                                                                        |
| Type II Diabetes Mellitus Signaling                               | 3,6E-01 | 6,76E-02 | 2,449 | IKBKE, PIK3CG, PIK3R1, PIK3R5, PKLR, PRKCB, PRKCQ, SLC27A2, SMPD3, SOCS1                                       |
| Epithelial Adherens Junction Signaling                            | 3,6E-01 | 6,76E-02 |       | CDC42, LEF1, MET, MYH6, NECTIN1, NOTCH2, TGFBR2, TUBA3C/TUBA3D, TUBB2A, WAS                                    |
| 14-3-3-mediated Signaling                                         | 3,7E-01 | 6,82E-02 | 1,890 | AKT1S1, PIK3CG, PIK3R1, PIK3R5, PLCB2, PRKCB, PRKCQ, TUBA3C/TUBA3D, TUBB2A                                     |
| D-myo-inositol (1,4,5)-Trisphosphate Biosynthesis                 | 3,7E-01 | 8,11E-02 |       | PIP4K2A, PLCB2, PLD4                                                                                           |
| Huntington's Disease Signaling                                    | 3,7E-01 | 6,48E-02 | 2,309 | CACNA1B, CASP8, CYCS, GRM1, HDAC10, HSPA6, IGF1, PENK, PIK3CG, PIK3R1, PIK3R5, PLCB2, PRKCB, PRKCQ, RPH3A, UBD |
| p38 MAPK Signaling                                                | 3,8E-01 | 6,84E-02 | 2,121 | FASLG, IL18, IL18RAP, IRAK3, MAP4K1, PLA2G4F, STAT1, TGFBR2                                                    |
| Airway Pathology in Chronic Obstructive Pulmonary Disease         | 3,8E-01 | 1,25E-01 |       | MMP9                                                                                                           |
| Retinoate Biosynthesis II                                         | 3,8E-01 | 1,25E-01 |       | RBP5                                                                                                           |
| Glycerol-3-phosphate Shuttle                                      | 3,8E-01 | 1,25E-01 |       | GPD1                                                                                                           |
| Tight Junction Signaling                                          | 3,9E-01 | 6,59E-02 |       | CDC42, CLDN14, CLDN3, EPB41, F2RL2, MYH6, NECTIN1, PPM1J, PPP2R2B, TGFBR2, TJP2                                |
| FAK Signaling                                                     | 3,9E-01 | 6,86E-02 |       | BCAR1, ITGA4, PIK3CG, PIK3R1, PIK3R5, PTK2, WAS                                                                |
| Sumoylation Pathway                                               | 3,9E-01 | 6,86E-02 | 0,000 | ARHGDIB, FASLG, FNBP1, MYB, RHOD, RHOH, ZNF217                                                                 |
| Role of Cytokines in Mediating Communication between Immune Cells | 3,9E-01 | 7,41E-02 |       | IFNG, IL18, IL23A, IL4                                                                                         |
| Phagosome Maturation                                              | 3,9E-01 | 6,62E-02 |       | CTSK, CTSW, HLA-A, HLA-DRB1, HLA-DRB5, NCF2, PRDX6, RAB7B, TUBA3C/TUBA3D, TUBB2A                               |
| CCR3 Signaling in Eosinophils                                     | 3,9E-01 | 6,67E-02 |       | CAMK4, MPRIP, PIK3CG, PIK3R1, PIK3R5, PLA2G4F, PLCB2, PRKCB, PRKCQ                                             |
| Endothelin-1 Signaling                                            | 4,0E-01 | 6,44E-02 | 2,496 | ADCY7, CASP8, PIK3CG, PIK3R1, PIK3R5, PLA2G4F, PLA2G7, PLAAT4, PLB1, PLCB2, PLD4, PRKCB, PRKCQ                 |
| Inhibition of Angiogenesis by TSP1                                | 4,0E-01 | 7,69E-02 |       | MMP9, SDC1, TGFBR2                                                                                             |

|                                                                      |         |          |        |                                                                                             |
|----------------------------------------------------------------------|---------|----------|--------|---------------------------------------------------------------------------------------------|
| Sertoli Cell-Sertoli Cell Junction Signaling                         | 4,0E-01 | 6,45E-02 |        | BCAR1, CDC42, CLDN14, CLDN3, EPB41, ITGA4, NECTIN1, RAB8B, TJP2, TUBA3C/TUBA3D, TUBB2A, WAS |
| HIPPO signaling                                                      | 4,1E-01 | 6,82E-02 | 0,000  | PPM1J, PPP1CC, PPP2R2B, STK4, TJP2, WWC1                                                    |
| IL-10 Signaling                                                      | 4,1E-01 | 6,94E-02 |        | CCR5, IKBKE, IL10RA, IL18, IL18RAP                                                          |
| Transcriptional Regulatory Network in Embryonic Stem Cells           | 4,2E-01 | 7,5E-02  |        | EOMES, GATA4, HESX1                                                                         |
| Inhibition of Matrix Metalloproteases                                | 4,2E-01 | 7,5E-02  |        | MMP25, MMP9, SDC1                                                                           |
| Leptin Signaling in Obesity                                          | 4,2E-01 | 6,74E-02 |        | ADCY7, GHRL, PIK3CG, PIK3R1, PIK3R5, PLCB2                                                  |
| GABA Receptor Signaling                                              | 4,2E-01 | 6,85E-02 |        | ADCY7, GABRR3, KCNN2, KCNN4, UBD                                                            |
| Melanoma Signaling                                                   | 4,3E-01 | 7,02E-02 |        | CDKN2A, PIK3CG, PIK3R1, PIK3R5                                                              |
| Role of JAK family kinases in IL-6-type Cytokine Signaling           | 4,3E-01 | 0,08     |        | SOCS1, STAT1                                                                                |
| ErbB4 Signaling                                                      | 4,4E-01 | 6,76E-02 | 2,236  | PIK3CG, PIK3R1, PIK3R5, PRKCB, PRKCQ                                                        |
| RhoA Signaling                                                       | 4,4E-01 | 6,45E-02 | 0,707  | ARHGAP4, ARHGAP9, IGF1, LPAR2, MPRIP, PIP4K2A, PTK2, PTK2B                                  |
| Docosahexaenoic Acid (DHA) Signaling                                 | 4,4E-01 | 6,9E-02  |        | CYCS, PIK3CG, PIK3R1, PIK3R5                                                                |
| Glycolysis I                                                         | 4,5E-01 | 7,14E-02 |        | ENO3, FBP1, PKLR                                                                            |
| UVC-Induced MAPK Signaling                                           | 4,5E-01 | 7,14E-02 |        | PRKCB, PRKCQ, SMPD3                                                                         |
| P2Y Purigenic Receptor Signaling Pathway                             | 4,5E-01 | 6,34E-02 | 1,667  | ADCY7, P2RY12, P2RY2, PIK3CG, PIK3R1, PIK3R5, PLCB2, PRKCB, PRKCQ                           |
| Embryonic Stem Cell Differentiation into Cardiac Lineages            | 4,5E-01 | 0,1      |        | GATA4                                                                                       |
| Role of Wnt/GSK-3 $\beta$ Signaling in the Pathogenesis of Influenza | 4,6E-01 | 6,58E-02 |        | IFNG, LEF1, WNT10A, WNT3, WNT3A                                                             |
| Ephrin Receptor Signaling                                            | 4,6E-01 | 6,21E-02 | 1,265  | ANGPT1, BCAR1, CDC42, CXCR4, ITGA4, NCK2, PIK3CG, PTK2, RAC2, WAS, WIPF1                    |
| Neuregulin Signaling                                                 | 4,6E-01 | 6,45E-02 | 0,447  | EREG, ITGA4, MATK, PIK3R1, PRKCB, PRKCQ                                                     |
| Hereditary Breast Cancer Signaling                                   | 4,7E-01 | 6,25E-02 |        | BRCA2, CHEK2, FANCA, FANCD2, HDAC10, PIK3CG, PIK3R1, PIK3R5, UBD                            |
| BMP signaling pathway                                                | 4,7E-01 | 6,49E-02 | 0,447  | BMP6, BMP7, CAMK4, FST, RUNX2                                                               |
| VEGF Family Ligand-Receptor Interactions                             | 4,7E-01 | 6,38E-02 | 1,633  | PIK3CG, PIK3R1, PIK3R5, PLA2G4F, PRKCB, PRKCQ                                               |
| p53 Signaling                                                        | 4,7E-01 | 6,31E-02 | -1,134 | CDKN2A, CHEK2, COQ8A, PIK3CG, PIK3R1, PIK3R5, TP53INP1                                      |
| Relaxin Signaling                                                    | 4,8E-01 | 6,17E-02 | 2,449  | ADCY7, MMP9, PDE4A, PDE4D, PDE6A, PDE9A, PIK3CG, PIK3R1, PIK3R5, RLN2                       |
| Role of IL-17F in Allergic Inflammatory Airway Diseases              | 4,8E-01 | 6,82E-02 |        | CCL4, CXCL10, IGF1                                                                          |
| Cyclins and Cell Cycle Regulation                                    | 4,8E-01 | 6,41E-02 | 0,000  | CDKN2A, E2F2, HDAC10, PPM1J, PPP2R2B                                                        |
| Heme Degradation                                                     | 4,8E-01 | 9,09E-02 |        | HMOX2                                                                                       |

|                                                      |         |          |        |                                                                                        |
|------------------------------------------------------|---------|----------|--------|----------------------------------------------------------------------------------------|
| 4-hydroxyproline Degradation I                       | 4,8E-01 | 9,09E-02 |        | HOGA1                                                                                  |
| IL-17A Signaling in Airway Cells                     | 4,9E-01 | 6,33E-02 | 2,236  | IKBKE, JAK3, PIK3CG, PIK3R1, PIK3R5                                                    |
| Gas Signaling                                        | 4,9E-01 | 6,19E-02 | -0,378 | ADCY7, ADRB1, HRH2, PTGDR, PTH1R, RYR1, VIPR2                                          |
| Role of NFAT in Cardiac Hypertrophy                  | 5,0E-01 | 6,03E-02 |        | ADCY7, CAMK4, GATA4, HDAC10, IGF1, PIK3CG, PIK3R1, PIK3R5, PLCB2, PRKCB, PRKCQ, TGFBR2 |
| Melanocyte Development and Pigmentation Signaling    | 5,0E-01 | 6,19E-02 | 1,342  | ADCY7, PIK3CG, PIK3R1, PIK3R5, PTPN6, SOX10                                            |
| Clathrin-mediated Endocytosis Signaling              | 5,0E-01 | 0,06     |        | APOA1, CDC42, F2R, IGF1, ITGB2, ITGB7, MET, PIK3CG, PIK3R1, PIK3R5, SERPINA1, UBD      |
| CNTF Signaling                                       | 5,1E-01 | 6,35E-02 | 2,000  | PIK3CG, PIK3R1, PIK3R5, STAT1                                                          |
| Gap Junction Signaling                               | 5,1E-01 | 6,01E-02 |        | ADCY7, ADRB1, PIK3CG, PIK3R1, PIK3R5, PLCB2, PRKCB, PRKCQ, TJP2, TUBA3C/TUBA3D, TUBB2A |
| PCP pathway                                          | 5,1E-01 | 6,35E-02 |        | SDC1, WNT10A, WNT3, WNT3A                                                              |
| G Beta Gamma Signaling                               | 5,1E-01 | 6,12E-02 | 0,816  | BTK, CDC42, KCNJ5, PIK3CG, PRKCB, PRKCQ                                                |
| Neurotrophin/TRK Signaling                           | 5,2E-01 | 6,17E-02 | 1,000  | CDC42, PIK3CG, PIK3R1, PIK3R5, SORCS1                                                  |
| Glutamate Receptor Signaling                         | 5,2E-01 | 6,25E-02 |        | CAMK4, GRIK2, GRIK3, GRM1                                                              |
| Adipogenesis pathway                                 | 5,3E-01 | 5,93E-02 |        | BMP7, CDKN2A, DGKD, ERCC2, HDAC10, SREBF1, TCF7, TXNIP                                 |
| Non-Small Cell Lung Cancer Signaling                 | 5,4E-01 | 6,02E-02 | 1,000  | CDKN2A, PIK3CG, PIK3R1, PIK3R5, STK4                                                   |
| Endometrial Cancer Signaling                         | 5,4E-01 | 6,06E-02 |        | LEF1, PIK3CG, PIK3R1, PIK3R5                                                           |
| Assembly of RNA Polymerase III Complex               | 5,4E-01 | 7,69E-02 |        | GTF3A                                                                                  |
| Glycerol Degradation I                               | 5,4E-01 | 7,69E-02 |        | GPD1                                                                                   |
| BER pathway                                          | 5,4E-01 | 7,69E-02 |        | LIG1                                                                                   |
| Glutathione Redox Reactions I                        | 5,5E-01 | 6,45E-02 |        | GPX3, PRDX6                                                                            |
| Sonic Hedgehog Signaling                             | 5,5E-01 | 6,45E-02 |        | GLIS1, GLIS2                                                                           |
| Tryptophan Degradation III (Eukaryotic)              | 5,5E-01 | 6,12E-02 |        | HAAO, IDO2, KMO                                                                        |
| Cell Cycle: G2/M DNA Damage Checkpoint Regulation    | 5,5E-01 | 6,12E-02 |        | AURKA, CDKN2A, CHEK2                                                                   |
| IL-17 Signaling                                      | 5,6E-01 | 5,88E-02 |        | CXCL10, CXCL11, PIK3CG, PIK3R1, PIK3R5                                                 |
| Ceramide Degradation                                 | 5,7E-01 | 7,14E-02 |        | NAAA                                                                                   |
| Glycoaminoglycan-protein Linkage Region Biosynthesis | 5,7E-01 | 7,14E-02 |        | B3GAT1                                                                                 |
| Oncostatin M Signaling                               | 6,0E-01 | 5,88E-02 |        | JAK3, STAT1                                                                            |
| Parkinson's Signaling                                | 6,2E-01 | 6,25E-02 |        | CYCS                                                                                   |
| CMP-N-acetylneuraminate Biosynthesis I (Eukaryotes)  | 6,4E-01 | 5,88E-02 |        | NANP                                                                                   |
| Adenine and Adenosine Salvage III                    | 6,4E-01 | 5,88E-02 |        | ADAT3                                                                                  |

|                                                   |         |          |       |                                                                                            |
|---------------------------------------------------|---------|----------|-------|--------------------------------------------------------------------------------------------|
| Pregnenolone Biosynthesis                         | 6,4E-01 | 5,88E-02 |       | MICAL1                                                                                     |
| Circadian Rhythm Signaling                        | 1,0E+00 | 5,71E-02 |       | CRY1, VIPR2                                                                                |
| Synaptic Long Term Potentiation                   | 1,0E+00 | 5,47E-02 | 1,633 | CAMK4, GRM1, PLCB2, PPP1CC, PPP1R1A, PRKCB, PRKCQ                                          |
| Amyotrophic Lateral Sclerosis Signaling           | 1,0E+00 | 5,83E-02 |       | CYCS, GRIK2, GRIK3, IGF1, PIK3CG, PIK3R1, PIK3R5                                           |
| NRF2-mediated Oxidative Stress Response           | 1,0E+00 | 4,15E-02 |       | DNAJB5, FOSL1, NQO2, PIK3CG, PIK3R1, PIK3R5, PRKCB, PRKCQ                                  |
| PPAR $\alpha$ /RXR $\alpha$ Activation            | 1,0E+00 | 4,37E-02 | 0,000 | ADCY7, APOA1, GPD1, IKBKE, IL18RAP, PLCB2, PRKCB, TGFBR2                                   |
| Aryl Hydrocarbon Receptor Signaling               | 1,0E+00 | 3,42E-02 |       | CDKN2A, CHEK2, FASLG, NQO2, TFF1                                                           |
| LPS/IL-1 Mediated Inhibition of RXR Function      | 1,0E+00 | 3,96E-02 |       | ABCC3, ABCG1, CHST1, CHST15, FMO3, IL18, IL18RAP, SLC27A2, SREBF1                          |
| Mitochondrial Dysfunction                         | 1,0E+00 | 3,19E-02 |       | ATP5MC1, CASP8, COX5A, CYCS, FURIN, LRRK2                                                  |
| PXR/RXR Activation                                | 1,0E+00 | 1,43E-02 |       | ABCC3                                                                                      |
| TR/RXR Activation                                 | 1,0E+00 | 5,71E-02 |       | ADRB1, CAMK4, PIK3CG, PIK3R1, PIK3R5, SREBF1                                               |
| RAR Activation                                    | 1,0E+00 | 3,55E-02 |       | ADCY7, ERCC2, PIK3CG, PIK3R1, PRKCB, PRKCQ, RBP5                                           |
| $\alpha$ -Adrenergic Signaling                    | 1,0E+00 | 5,15E-02 | 1,342 | ADCY7, CAMK4, PRKCB, PRKCQ, PYGM                                                           |
| MIF Regulation of Innate Immunity                 | 1,0E+00 | 4,55E-02 |       | CD74, PLA2G4F                                                                              |
| IL-22 Signaling                                   | 1,0E+00 | 4,17E-02 |       | STAT1                                                                                      |
| Mechanisms of Viral Exit from Host Cells          | 1,0E+00 | 4,88E-02 |       | PRKCB, PRKCQ                                                                               |
| HIF1 $\alpha$ Signaling                           | 1,0E+00 | 5,13E-02 |       | EGLN1, MMP25, MMP9, PIK3CG, PIK3R1, PIK3R5                                                 |
| Melatonin Signaling                               | 1,0E+00 | 5,19E-02 | 2,000 | CAMK4, PLCB2, PRKCB, PRKCQ                                                                 |
| Cardiac Hypertrophy Signaling                     | 1,0E+00 | 5,33E-02 | 1,941 | ADCY7, ADRB1, CAMK4, FNBP1, GATA4, IGF1, PIK3CG, PIK3R1, PIK3R5, PLCB2, RHOD, RHOH, TGFBR2 |
| CDK5 Signaling                                    | 1,0E+00 | 3,88E-02 | 1,000 | ADCY7, PPM1J, PPP1CC, PPP2R2B                                                              |
| Corticotropin Releasing Hormone Signaling         | 1,0E+00 | 4,13E-02 | 2,000 | ADCY7, CAMK4, FASLG, PRKCB, PRKCQ                                                          |
| Maturity Onset Diabetes of Young (MODY) Signaling | 1,0E+00 | 0,04     |       | PKLR                                                                                       |
| GNRH Signaling                                    | 1,0E+00 | 4,44E-02 | 0,816 | ADCY7, CDC42, PLCB2, PRKCB, PRKCQ, PTK2                                                    |
| ATM Signaling                                     | 1,0E+00 | 3,75E-02 |       | CHEK2, FANCD2, PPP2R2B                                                                     |
| Antiproliferative Role of Somatostatin Receptor 2 | 1,0E+00 | 5,06E-02 | 2,000 | PIK3CG, PIK3R1, PIK3R5, PTPN6                                                              |
| Androgen Signaling                                | 1,0E+00 | 4,39E-02 | 1,000 | CAMK4, ERCC2, PRKCB, PRKCQ, SHBG                                                           |
| Aldosterone Signaling in Epithelial Cells         | 1,0E+00 | 5,11E-02 | 2,646 | DNAJB5, HSPA6, PIK3CG, PIK3R1, PIK3R5, PIP4K2A, PLCB2, PRKCB, PRKCQ                        |
| CREB Signaling in Neurons                         | 1,0E+00 | 5,73E-02 | 2,111 | ADCY7, CAMK4, GRIK2, GRIK3, GRM1, PIK3CG, PIK3R1, PIK3R5, PLCB2, PRKCB, PRKCQ              |
| Prostate Cancer Signaling                         | 1,0E+00 | 4,08E-02 |       | LEF1, PIK3CG, PIK3R1, PIK3R5                                                               |

|                                                                    |         |          |       |                                                         |
|--------------------------------------------------------------------|---------|----------|-------|---------------------------------------------------------|
| Thyroid Cancer Signaling                                           | 1,0E+00 | 2,44E-02 |       | LEF1                                                    |
| Bladder Cancer Signaling                                           | 1,0E+00 | 3,45E-02 |       | CDKN2A, MMP25, MMP9                                     |
| ERK5 Signaling                                                     | 1,0E+00 | 3,12E-02 |       | FOSL1, SH2D2A                                           |
| G Protein Signaling Mediated by Tubby                              | 1,0E+00 | 5,71E-02 |       | LCK, PLCB2                                              |
| EIF2 Signaling                                                     | 1,0E+00 | 2,68E-02 | 0,816 | PIK3CG, PIK3R1, PIK3R5, PPP1CC, RPL27A, SREBF1          |
| AMPK Signaling                                                     | 1,0E+00 | 3,4E-02  | 0,378 | ADRB1, AKT1S1, PIK3CG, PIK3R1, PIK3R5, PPM1J, PPP2R2B   |
| Regulation of eIF4 and p70S6K Signaling                            | 1,0E+00 | 4,35E-02 | 1,633 | EIF4EBP2, ITGA4, PIK3CG, PIK3R1, PIK3R5, PPM1J, PPP2R2B |
| Estrogen-Dependent Breast Cancer Signaling                         | 1,0E+00 | 4,94E-02 | 2,000 | IGF1, PIK3CG, PIK3R1, PIK3R5                            |
| IL-1 Signaling                                                     | 1,0E+00 | 3,19E-02 |       | ADCY7, IKBKE, IRAK3                                     |
| Role of Lipids/Lipid Rafts in the Pathogenesis of Influenza        | 1,0E+00 | 4,35E-02 |       | IFNG                                                    |
| Antiproliferative Role of TOB in T Cell Signaling                  | 1,0E+00 | 3,85E-02 |       | TGFBR2                                                  |
| Extrinsic Prothrombin Activation Pathway                           | 1,0E+00 | 5,56E-02 |       | F13A1                                                   |
| MIF-mediated Glucocorticoid Regulation                             | 1,0E+00 | 5,71E-02 |       | CD74, PLA2G4F                                           |
| Cell Cycle Control of Chromosomal Replication                      | 1,0E+00 | 5,26E-02 |       | CHEK2, LIG1                                             |
| Assembly of RNA Polymerase II Complex                              | 1,0E+00 | 0,02     |       | ERCC2                                                   |
| Role of IL-17A in Arthritis                                        | 1,0E+00 | 5,8E-02  |       | CCL5, PIK3CG, PIK3R1, PIK3R5                            |
| IL-17A Signaling in Fibroblasts                                    | 1,0E+00 | 2,86E-02 |       | IKBKE                                                   |
| NGF Signaling                                                      | 1,0E+00 | 4,88E-02 | 1,633 | CDC42, IKBKE, PIK3CG, PIK3R1, PIK3R5, SMPD3             |
| Mouse Embryonic Stem Cell Pluripotency                             | 1,0E+00 | 5,66E-02 | 1,633 | JAK3, LEF1, PIK3CG, PIK3R1, PIK3R5, WNT3A               |
| nNOS Signaling in Neurons                                          | 1,0E+00 | 5,77E-02 |       | CAMK4, PRKCB, PRKCQ                                     |
| ErbB2-ErbB3 Signaling                                              | 1,0E+00 | 5,8E-02  | 2,000 | JAK3, PIK3CG, PIK3R1, PIK3R5                            |
| Estrogen-mediated S-phase Entry                                    | 1,0E+00 | 4,17E-02 |       | E2F2                                                    |
| Heparan Sulfate Biosynthesis                                       | 1,0E+00 | 4,17E-02 |       | B3GAT1, CHST1, CHST15, PRDX6                            |
| Fatty Acid Activation                                              | 1,0E+00 | 5,26E-02 |       | SLC27A2                                                 |
| Sphingosine and Sphingosine-1-phosphate Metabolism                 | 1,0E+00 | 5,26E-02 |       | NAAA                                                    |
| Retinoate Biosynthesis I                                           | 1,0E+00 | 2,63E-02 |       | RBP5                                                    |
| Thyroid Hormone Metabolism II (via Conjugation and/or Degradation) | 1,0E+00 | 3,28E-02 |       | LARGE1, LARGE2                                          |
| Nicotine Degradation III                                           | 1,0E+00 | 3,39E-02 |       | LARGE1, LARGE2                                          |
| Heparan Sulfate Biosynthesis (Late Stages)                         | 1,0E+00 | 3,53E-02 |       | CHST1, CHST15, PRDX6                                    |
| Ubiquinol-10 Biosynthesis (Eukaryotic)                             | 1,0E+00 | 3,12E-02 |       | MICAL1                                                  |
| CDP-diacylglycerol Biosynthesis I                                  | 1,0E+00 | 2,86E-02 |       | LPCAT3                                                  |
| The Visual Cycle                                                   | 1,0E+00 | 3,12E-02 |       | RBP5                                                    |

|                                                                 |         |          |                                          |
|-----------------------------------------------------------------|---------|----------|------------------------------------------|
| Melatonin Degradation I                                         | 1,0E+00 | 2,74E-02 | LARGE1, LARGE2                           |
| γ-linolenate Biosynthesis II (Animals)                          | 1,0E+00 | 4,17E-02 | SLC27A2                                  |
| NAD Salvage Pathway II                                          | 1,0E+00 | 2,86E-02 | ACP5                                     |
| Pyridoxal 5'-phosphate Salvage Pathway                          | 1,0E+00 | 2,67E-02 | PIM1, PRKCQ                              |
| Pyrimidine Deoxyribonucleotides De Novo Biosynthesis I          | 1,0E+00 | 2,44E-02 | APOBEC3G                                 |
| Triacylglycerol Degradation                                     | 1,0E+00 | 5,08E-02 | CEL, FAAH, PRDX6                         |
| Choline Biosynthesis III                                        | 1,0E+00 | 4,55E-02 | PLD4                                     |
| Chondroitin Sulfate Biosynthesis                                | 1,0E+00 | 4,05E-02 | B3GAT1, CHST1, CHST15                    |
| Dermatan Sulfate Biosynthesis                                   | 1,0E+00 | 0,04     | B3GAT1, CHST1, CHST15                    |
| Glycogen Degradation III                                        | 1,0E+00 | 0,05     | PYGM                                     |
| Glutathione-mediated Detoxification                             | 1,0E+00 | 2,44E-02 | ANPEP                                    |
| 1D-myo-inositol Hexakisphosphate Biosynthesis II (Mammalian)    | 1,0E+00 | 3,7E-02  | INPP5D                                   |
| NAD Phosphorylation and Dephosphorylation                       | 1,0E+00 | 0,05     | ACP5                                     |
| Dermatan Sulfate Biosynthesis (Late Stages)                     | 1,0E+00 | 3,85E-02 | CHST1, CHST15                            |
| Phosphatidylglycerol Biosynthesis II (Non-plastidic)            | 1,0E+00 | 2,44E-02 | LPCAT3                                   |
| Glycogen Degradation II                                         | 1,0E+00 | 5,56E-02 | PYGM                                     |
| Nicotine Degradation II                                         | 1,0E+00 | 4,11E-02 | FMO3, LARGE1, LARGE2                     |
| Superpathway of D-myo-inositol (1,4,5)-trisphosphate Metabolism | 1,0E+00 | 3,12E-02 | INPP5D                                   |
| Purine Nucleotides Degradation II (Aerobic)                     | 1,0E+00 | 2,7E-02  | ADAT3                                    |
| Mitochondrial L-carnitine Shuttle Pathway                       | 1,0E+00 | 4,76E-02 | SLC27A2                                  |
| D-myo-inositol (1,3,4)-trisphosphate Biosynthesis               | 1,0E+00 | 0,04     | INPP5D                                   |
| Serotonin Degradation                                           | 1,0E+00 | 2,2E-02  | LARGE1, LARGE2                           |
| Phenylalanine Degradation IV (Mammalian, via Side Chain)        | 1,0E+00 | 3,12E-02 | SLC27A2                                  |
| D-myo-inositol (1,4,5)-trisphosphate Degradation                | 1,0E+00 | 4,55E-02 | INPP5D                                   |
| Retinol Biosynthesis                                            | 1,0E+00 | 4,08E-02 | CEL, RBP5                                |
| Purine Ribonucleosides Degradation to Ribose-1-phosphate        | 1,0E+00 | 0,05     | ADAT3                                    |
| Triacylglycerol Biosynthesis                                    | 1,0E+00 | 1,72E-02 | LPCAT3                                   |
| Salvage Pathways of Pyrimidine Ribonucleotides                  | 1,0E+00 | 4,46E-02 | APOBEC2, APOBEC3G, APOBEC3H, PIM1, PRKCQ |
| Gluconeogenesis I                                               | 1,0E+00 | 4,26E-02 | ENO3, FBP1                               |

|                                                      |         |          |        |                                                                                               |
|------------------------------------------------------|---------|----------|--------|-----------------------------------------------------------------------------------------------|
| Histamine Degradation                                | 1,0E+00 | 3,03E-02 |        | HNMT                                                                                          |
| Chondroitin Sulfate Biosynthesis (Late Stages)       | 1,0E+00 | 3,39E-02 |        | CHST1, CHST15                                                                                 |
| Salvage Pathways of Pyrimidine Deoxyribonucleotides  | 1,0E+00 | 0,05     |        | APOBEC3G                                                                                      |
| Adenosine Nucleotides Degradation II                 | 1,0E+00 | 3,57E-02 |        | ADAT3                                                                                         |
| Superpathway of Melatonin Degradation                | 1,0E+00 | 2,3E-02  |        | LARGE1, LARGE2                                                                                |
| Histidine Degradation VI                             | 1,0E+00 | 4,55E-02 |        | MICAL1                                                                                        |
| Stearate Biosynthesis I (Animals)                    | 1,0E+00 | 1,82E-02 |        | SLC27A2                                                                                       |
| UDP-N-acetyl-D-galactosamine Biosynthesis II         | 1,0E+00 | 3,85E-02 |        | UAP1                                                                                          |
| Fatty Acid $\beta$ -oxidation I                      | 1,0E+00 | 2,22E-02 |        | SLC27A2                                                                                       |
| DNA damage-induced 14-3-3 $\sigma$ Signaling         | 1,0E+00 | 5,26E-02 |        | RAD1                                                                                          |
| Regulation of Cellular Mechanics by Calpain Protease | 1,0E+00 | 3,45E-02 |        | ITGA4, PTK2                                                                                   |
| Remodeling of Epithelial Adherens Junctions          | 1,0E+00 | 4,35E-02 |        | MET, TUBA3C/TUBA3D, TUBB2A                                                                    |
| STAT3 Pathway                                        | 1,0E+00 | 5,41E-02 | -1,000 | PIM1, PTPN6, SOCS1, TGFBR2                                                                    |
| Oxidative Phosphorylation                            | 1,0E+00 | 2,52E-02 |        | ATP5MC1, COX5A, CYCS                                                                          |
| Wnt/Ca+ pathway                                      | 1,0E+00 | 3,33E-02 |        | NFATC2, PLCB2                                                                                 |
| Estrogen Receptor Signaling                          | 1,0E+00 | 1,56E-02 |        | ERCC2, RUNX2                                                                                  |
| EGF Signaling                                        | 1,0E+00 | 5,56E-02 | 2,000  | PIK3CG, PIK3R1, PIK3R5, STAT1                                                                 |
| Cell Cycle: G1/S Checkpoint Regulation               | 1,0E+00 | 4,69E-02 |        | CDKN2A, E2F2, HDAC10                                                                          |
| Nucleotide Excision Repair Pathway                   | 1,0E+00 | 2,86E-02 |        | ERCC2                                                                                         |
| Protein Ubiquitination Pathway                       | 1,0E+00 | 3,86E-02 |        | BAG1, DNAJB5, HLA-A, HSPA6, IFNG, UBD, UBE2L6, USP2, USP31, USP51                             |
| FGF Signaling                                        | 1,0E+00 | 5,32E-02 | 0,447  | MET, PIK3CG, PIK3R1, PIK3R5, PTPN6                                                            |
| Endoplasmic Reticulum Stress Pathway                 | 1,0E+00 | 4,76E-02 |        | ERN1                                                                                          |
| Xenobiotic Metabolism Signaling                      | 1,0E+00 | 4,48E-02 |        | ABCC3, CAMK4, CHST1, CHST15, FMO3, NQO2, PIK3CG, PIK3R1, PIK3R5, PPM1J, PPP2R2B, PRKCB, PRKCQ |
| Serotonin Receptor Signaling                         | 1,0E+00 | 1,89E-02 |        | ADCY7                                                                                         |
| Insulin Receptor Signaling                           | 1,0E+00 | 3,4E-02  | 0,447  | INPP5D, PIK3CG, PIK3R1, PIK3R5, PPP1CC                                                        |
| Phototransduction Pathway                            | 1,0E+00 | 4,92E-02 |        | PDE6A, RGS9, RGS9BP                                                                           |
| PPAR Signaling                                       | 1,0E+00 | 3,23E-02 |        | IKBKE, IL18, IL18RAP                                                                          |
| IGF-1 Signaling                                      | 1,0E+00 | 5,56E-02 | 0,816  | IGF1, PIK3CG, PIK3R1, PIK3R5, PTK2, SOCS1                                                     |
| Dopamine Receptor Signaling                          | 1,0E+00 | 5,49E-02 |        | ADCY7, DRD4, PPM1J, PPP1CC, PPP2R2B                                                           |
| Notch Signaling                                      | 1,0E+00 | 5,26E-02 |        | FURIN, NOTCH2                                                                                 |
| Hypoxia Signaling in the Cardiovascular System       | 1,0E+00 | 1,54E-02 |        | UBE2L6                                                                                        |

|                                                                                 |         |          |       |                                                                 |
|---------------------------------------------------------------------------------|---------|----------|-------|-----------------------------------------------------------------|
| IL-6 Signaling                                                                  | 1,0E+00 | 5,51E-02 | 1,890 | IKBKE, IL18, IL18RAP, PIK3CG, PIK3R1, PIK3R5, SOCS1             |
| GPCR-Mediated Integration of Enteroendocrine Signaling Exemplified by an L Cell | 1,0E+00 | 3,75E-02 |       | ADCY7, ADRB1, PLCB2                                             |
| GPCR-Mediated Nutrient Sensing in Enteroendocrine Cells                         | 1,0E+00 | 5,43E-02 |       | ADCY7, FFAR4, PLCB2, PRKCB, PRKCQ                               |
| autophagy                                                                       | 1,0E+00 | 3,12E-02 |       | CTSK, CTSW                                                      |
| Cancer Drug Resistance By Drug Efflux                                           | 1,0E+00 | 3,57E-02 |       | PIK3CG, PIK3R1                                                  |
| Calcium Signaling                                                               | 1,0E+00 | 4,84E-02 |       | ATP2A2, ATP2A3, CAMK4, HDAC10, MYH6, NFATC2, RYR1, TNNI2, TRPC4 |

**P-value of the overlap between DEGs and canonical pathway gene lists was calculated with Fisher's exact test. Ratio is the percentage of DEGs in each canonical pathway**
