# Supplementary material for: miRNAs may play a major role in the control of gene expression in key pathobiological processes in Chagas disease cardiomyopathy
Source: PubMed Central journal article supplement (PMC7787679; doi:10.1371/journal.pntd.0008889), 2020-12-22
Supplement: pntd.0008889.s006.pdf [file pntd.0008889.s006.pdf]

**S6 table.** Cytokines and chemokines differentially expressed in CCC heart tissue.

| <b>Gene</b>     | <b>Gene name</b>                                   | <b>Expr<br/>Fold<br/>Change</b> | <b>Corrected<br/>p-value</b> |
|-----------------|----------------------------------------------------|---------------------------------|------------------------------|
| <b>CCL5</b>     | C-C motif chemokine ligand 5/RANTES                | 77.89                           | 3.17E-05                     |
| <b>CXCL9</b>    | C-X-C motif chemokine ligand 9/MIG                 | 64.05                           | 3.94E-04                     |
| <b>CCL4</b>     | C-C motif chemokine ligand 4/MIP-1 $\beta$         | 20.66                           | 6.28E-06                     |
| <b>XCL1</b>     | X-C motif chemokine ligand<br>1/Lymphotaxin        | 19.99                           | 4.38E-04                     |
| <b>CCL17</b>    | C-C motif chemokine ligand 17/TARC                 | 18.55                           | 1.40E-04                     |
| <b>CCL19</b>    | C-C motif chemokine ligand 19/ MIP-3 $\beta$       | 16.14                           | 1.76E-02                     |
| <b>CXCL11</b>   | C-X-C motif chemokine ligand 11/I-TAC              | 14.71                           | 2.07E-02                     |
| <b>CXCL10</b>   | C-X-C motif chemokine ligand 10/IP10               | 12.85                           | 1.71E-02                     |
| <b>TNFSF14</b>  | HVEM/LIGHT- TNF superfamily<br>member 14           | 8.94                            | 6.00E-03                     |
| <b>LTB</b>      | lymphotoxin beta                                   | 8.56                            | 1.35E-02                     |
| <b>IL7</b>      | interleukin 7                                      | 6.23                            | 2.24E-03                     |
| <b>CCL3</b>     | C-C motif chemokine ligand 3/ MIP-1 $\alpha$       | 6.04                            | 1.36E-02                     |
| <b>IFNG</b>     | Interferon gamma                                   | 5.86                            | 6.86E-03                     |
| <b>IL16</b>     | interleukin 16                                     | 5.72                            | 1.53E-04                     |
| <b>CCL3L3</b>   | C-C motif chemokine ligand 3 like 3                | 5.43                            | 1.68E-03                     |
| <b>TNFSF13B</b> | BAFF                                               | 5.40                            | 5.53E-03                     |
| <b>EBI3</b>     | IL-27B /Epstein-Barr virus induced 3               | 5.27                            | 1.19E-02                     |
| <b>IL18</b>     | interleukin 18                                     | 4.81                            | 1.27E-02                     |
| <b>CCL28</b>    | C-C motif chemokine ligand 28                      | 4.51                            | 3.46E-03                     |
| <b>CCL14</b>    | C-C motif chemokine ligand 14                      | 4.11                            | 2.45E-02                     |
| <b>C5</b>       | complement C5                                      | 3.81                            | 1.11E-02                     |
| <b>IL23A</b>    | interleukin 23 subunit alpha                       | 3.23                            | 7.08E-04                     |
| <b>CXCL16</b>   | C-X-C motif chemokine ligand 16                    | 3.05                            | 3.62E-02                     |
| <b>TNFSF8</b>   | TNF superfamily member 8                           | 2.66                            | 2.96E-02                     |
| <b>CYTL1</b>    | cytokine like 1                                    | 2.41                            | 7.99E-03                     |
| <b>IL4</b>      | interleukin 4                                      | 2.34                            | 2.90E-02                     |
| <b>TNFSF13</b>  | APRIL/TNF superfamily member 13                    | 2.19                            | 2.93E-02                     |
| <b>FLT3LG</b>   | Flt Ligand/fms related tyrosine kinase 3<br>ligand | 2.00                            | 3.19E-02                     |
