# Supplementary material for: miRNAs may play a major role in the control of gene expression in key pathobiological processes in Chagas disease cardiomyopathy
Source: PubMed Central journal article supplement (PMC7787679; doi:10.1371/journal.pntd.0008889), 2020-12-22
Supplement: pntd.0008889.s007.pdf [file pntd.0008889.s007.pdf]

**S7 table.** DEMs in CCC myocardium.

| genes            | Significant miRNAs |                  |             |
|------------------|--------------------|------------------|-------------|
|                  | P value            | Adjusted p value | Fold Change |
| hsa-miR-146a-5p  | 3.3E-05            | 6.9E-03          | 3.9         |
| hsa-miR-155-5p   | 6.5E-05            | 6.9E-03          | 3.8         |
| hsa-miR-193a-5p  | 4.7E-02            | 1.2E-01          | -1.7        |
| hsa-miR-409-3p   | 4.2E-02            | 1.2E-01          | -1.8        |
| hsa-miR-24-3p    | 3.9E-02            | 1.2E-01          | -1.8        |
| hsa-miR-93-5p    | 4.3E-02            | 1.2E-01          | -1.8        |
| hsa-miR-92a-3p   | 2.7E-02            | 1.0E-01          | -1.9        |
| hsa-miR-192-5p   | 3.0E-02            | 1.0E-01          | -1.9        |
| hsa-miR-127-3p   | 4.0E-02            | 1.2E-01          | -1.9        |
| hsa-miR-30c-5p   | 4.3E-02            | 1.2E-01          | -1.9        |
| hsa-miR-26a-5p   | 3.0E-02            | 1.0E-01          | -1.9        |
| hsa-miR-532-5p   | 3.6E-02            | 1.1E-01          | -1.9        |
| hsa-miR-376c-3p  | 1.9E-02            | 9.7E-02          | -2.0        |
| hsa-miR-486-5p   | 4.6E-02            | 1.2E-01          | -2.0        |
| hsa-miR-25-3p    | 4.5E-02            | 1.2E-01          | -2.0        |
| hsa-miR-95-3p    | 4.0E-02            | 1.2E-01          | -2.1        |
| hsa-miR-152-3p   | 4.0E-02            | 1.2E-01          | -2.1        |
| hsa-miR-24-2-5p  | 2.3E-02            | 9.9E-02          | -2.1        |
| hsa-miR-15b-5p   | 9.0E-03            | 8.8E-02          | -2.1        |
| hsa-miR-378      | 3.1E-02            | 1.0E-01          | -2.1        |
| hsa-miR-20a-3p   | 1.5E-02            | 9.0E-02          | -2.1        |
| hsa-miR-744-5p   | 3.0E-02            | 1.0E-01          | -2.1        |
| hsa-miR-99a-3p   | 2.4E-02            | 1.0E-01          | -2.1        |
| hsa-miR-345-5p   | 1.4E-02            | 9.0E-02          | -2.1        |
| hsa-miR-328-3p   | 3.0E-02            | 1.0E-01          | -2.1        |
| hsa-miR-103a-3p  | 2.6E-02            | 1.0E-01          | -2.1        |
| hsa-miR-33a-3p   | 1.9E-02            | 9.7E-02          | -2.2        |
| hsa-miR-15a-5p   | 1.9E-02            | 9.7E-02          | -2.2        |
| hsa-miR-423-5p   | 2.2E-02            | 9.8E-02          | -2.2        |
| hsa-miR-411-5p   | 1.5E-02            | 9.0E-02          | -2.2        |
| hsa-miR-28-5p    | 2.9E-02            | 1.0E-01          | -2.2        |
| hsa-miR-296-5p   | 4.1E-02            | 1.2E-01          | -2.2        |
| hsa-miR-335-5p   | 2.1E-02            | 9.8E-02          | -2.2        |
| hsa-miR-29a-3p   | 2.3E-02            | 9.9E-02          | -2.2        |
| hsa-miR-125b-5p  | 4.6E-02            | 1.2E-01          | -2.3        |
| hsa-miR-340-5p   | 2.4E-02            | 1.0E-01          | -2.3        |
| hsa-miR-20b-5p   | 1.3E-02            | 9.0E-02          | -2.3        |
| hsa-miR-302b-3p  | 3.4E-02            | 1.1E-01          | -2.3        |
| hsa-miR-151a-5p  | 7.9E-03            | 8.6E-02          | -2.3        |
| hsa-miR-133b     | 1.3E-02            | 9.0E-02          | -2.3        |
| hsa-miR-106b-5p  | 3.0E-02            | 1.0E-01          | -2.3        |
| hsa-miR-379-5p   | 1.3E-02            | 9.0E-02          | -2.4        |
| hsa-miR-133a-3p  | 1.4E-02            | 9.0E-02          | -2.4        |
| hsa-miR-302d-3p  | 2.7E-02            | 1.0E-01          | -2.4        |
| hsa-miR-19b-1-5p | 1.6E-02            | 9.3E-02          | -2.5        |
| hsa-miR-642a-5p  | 7.8E-03            | 8.6E-02          | -2.5        |

|                 |         |         |      |
|-----------------|---------|---------|------|
| hsa-miR-9-3p    | 3.9E-03 | 8.0E-02 | -2.5 |
| hsa-miR-145-3p  | 3.9E-03 | 8.0E-02 | -2.5 |
| hsa-miR-1233-3p | 7.6E-03 | 8.6E-02 | -2.5 |
| hsa-miR-487b-3p | 2.1E-02 | 9.8E-02 | -2.5 |
| hsa-miR-185-5p  | 2.7E-02 | 1.0E-01 | -2.6 |
| hsa-miR-212-3p  | 1.9E-02 | 9.7E-02 | -2.6 |
| hsa-miR-22-5p   | 3.8E-03 | 8.0E-02 | -2.6 |
| hsa-miR-422a    | 9.6E-03 | 8.8E-02 | -2.6 |
| hsa-miR-376a-3p | 2.6E-03 | 8.0E-02 | -2.6 |
| hsa-miR-148a-3p | 4.4E-02 | 1.2E-01 | -2.6 |
| hsa-miR-365a-3p | 2.1E-03 | 8.0E-02 | -2.7 |
| hsa-miR-1-3p    | 5.0E-03 | 8.6E-02 | -2.7 |
| hsa-miR-324-5p  | 2.0E-02 | 9.8E-02 | -2.9 |
| hsa-miR-9-5p    | 3.5E-03 | 8.0E-02 | -2.9 |
| hsa-miR-99a-5p  | 1.4E-02 | 9.0E-02 | -2.9 |
| hsa-miR-101-3p  | 4.2E-02 | 1.2E-01 | -2.9 |
| hsa-miR-361-5p  | 3.1E-02 | 1.0E-01 | -2.9 |
| hsa-miR-27a-3p  | 2.8E-02 | 1.0E-01 | -2.9 |
| hsa-miR-455-5p  | 1.2E-02 | 9.0E-02 | -3.0 |
| hsa-miR-145-5p  | 2.0E-03 | 8.0E-02 | -3.0 |
| hsa-miR-29c-3p  | 1.1E-02 | 9.0E-02 | -3.1 |
| hsa-miR-378a-5p | 2.8E-03 | 8.0E-02 | -3.1 |
| hsa-miR-23b-3p  | 1.0E-02 | 8.8E-02 | -3.2 |
| hsa-miR-224-5p  | 1.8E-02 | 9.7E-02 | -3.2 |
| hsa-miR-455-3p  | 1.5E-02 | 9.0E-02 | -3.3 |
| hsa-miR-203a-3p | 4.2E-03 | 8.0E-02 | -3.4 |
| hsa-miR-494-3p  | 8.2E-03 | 8.6E-02 | -3.5 |
| hsa-miR-143-3p  | 9.5E-03 | 8.8E-02 | -3.6 |
| hsa-miR-451a    | 1.7E-02 | 9.6E-02 | -3.7 |
| hsa-miR-499a-5p | 6.2E-03 | 8.6E-02 | -3.8 |
| hsa-miR-27b-3p  | 6.1E-03 | 8.6E-02 | -4.1 |
| hsa-miR-221-3p  | 6.5E-03 | 8.6E-02 | -4.3 |
| hsa-miR-22-3p   | 7.3E-03 | 8.6E-02 | -4.7 |
| hsa-miR-151a-3p | 2.5E-02 | 1.0E-01 | -4.9 |

---

**Non significant miRNAs**

---

| <b>genes</b>    | <b>genes</b> | <b>genes</b> | <b>genes</b> |
|-----------------|--------------|--------------|--------------|
| hsa-miR-598-3p  | 1.7E-01      | 2.6E-01      | 7.0          |
| hsa-miR-142-3p  | 5.8E-02      | 1.4E-01      | 2.2          |
| hsa-miR-146b-5p | 5.4E-02      | 1.3E-01      | 2.0          |
| hsa-miR-34a-3p  | 1.6E-01      | 2.5E-01      | 1.7          |
| hsa-miR-339-5p  | 2.0E-01      | 3.1E-01      | 1.5          |
| hsa-miR-1275    | 2.8E-01      | 3.8E-01      | 1.5          |
| hsa-miR-489-3p  | 3.2E-01      | 4.1E-01      | 1.5          |
| hsa-let-7b-5p   | 2.7E-01      | 3.7E-01      | 1.5          |
| hsa-miR-150-5p  | 1.2E-01      | 2.2E-01      | 1.5          |
| hsa-miR-539-5p  | 5.6E-01      | 6.4E-01      | 1.4          |
| hsa-miR-140-3p  | 3.0E-01      | 3.9E-01      | 1.4          |
| hsa-miR-628-3p  | 3.5E-01      | 4.5E-01      | 1.4          |
| hsa-miR-766-3p  | 3.5E-01      | 4.5E-01      | 1.4          |
| hsa-miR-320a    | 5.2E-01      | 6.0E-01      | 1.3          |

|                   |         |         |      |
|-------------------|---------|---------|------|
| hsa-miR-10a-5p    | 6.1E-01 | 6.8E-01 | 1.3  |
| hsa-miR-625-3p    | 3.7E-01 | 4.6E-01 | 1.3  |
| hsa-miR-1260a     | 6.9E-01 | 7.5E-01 | 1.2  |
| hsa-miR-454-3p    | 7.5E-01 | 8.0E-01 | 1.1  |
| hsa-miR-28-3p     | 8.0E-01 | 8.6E-01 | 1.1  |
| hsa-miR-664a-3p   | 8.5E-01 | 8.9E-01 | 1.1  |
| hsa-miR-339-3p    | 8.9E-01 | 9.3E-01 | 1.0  |
| hsa-miR-886-5p    | 9.4E-01 | 9.5E-01 | 1.0  |
| hsa-let-7a-5p     | 9.2E-01 | 9.5E-01 | 1.0  |
| hsa-miR-210-3p    | 9.6E-01 | 9.7E-01 | 1.0  |
| hsa-miR-708-5p    | 9.8E-01 | 9.8E-01 | 1.0  |
| hsa-miR-886-3p    | 9.9E-01 | 9.9E-01 | -1.0 |
| hsa-miR-16-5p     | 9.3E-01 | 9.5E-01 | -1.0 |
| hsa-let-7c-5p     | 9.2E-01 | 9.5E-01 | -1.0 |
| hsa-miR-197-3p    | 9.4E-01 | 9.5E-01 | -1.0 |
| hsa-miR-720       | 8.8E-01 | 9.2E-01 | -1.0 |
| hsa-miR-186-5p    | 8.4E-01 | 8.8E-01 | -1.1 |
| hsa-miR-7-1-3p    | 8.1E-01 | 8.6E-01 | -1.1 |
| hsa-miR-425-5p    | 7.1E-01 | 7.6E-01 | -1.1 |
| hsa-let-7e-5p     | 6.6E-01 | 7.3E-01 | -1.1 |
| hsa-miR-362-5p    | 7.0E-01 | 7.6E-01 | -1.1 |
| hsa-miR-574-3p    | 6.9E-01 | 7.6E-01 | -1.1 |
| hsa-miR-374a-5p   | 6.9E-01 | 7.6E-01 | -1.1 |
| hsa-miR-93-3p     | 6.4E-01 | 7.2E-01 | -1.1 |
| hsa-miR-130b-3p   | 6.5E-01 | 7.3E-01 | -1.2 |
| hsa-miR-769-5p    | 5.7E-01 | 6.5E-01 | -1.2 |
| hsa-miR-628-5p    | 5.7E-01 | 6.4E-01 | -1.2 |
| hsa-miR-30d-5p    | 4.9E-01 | 5.8E-01 | -1.2 |
| hsa-miR-1271-5p   | 4.1E-01 | 5.0E-01 | -1.3 |
| hsa-miR-511-5p    | 5.6E-01 | 6.4E-01 | -1.3 |
| hsa-miR-222-5p    | 4.9E-01 | 5.8E-01 | -1.3 |
| hsa-miR-483-5p    | 5.4E-01 | 6.3E-01 | -1.3 |
| hsa-miR-191-5p    | 3.8E-01 | 4.7E-01 | -1.3 |
| hsa-miR-135b-5p   | 4.9E-01 | 5.8E-01 | -1.3 |
| hsa-miR-1180-3p   | 4.8E-01 | 5.8E-01 | -1.3 |
| hsa-miR-222-3p    | 3.9E-01 | 4.8E-01 | -1.3 |
| hsa-miR-21-5p     | 5.2E-01 | 6.1E-01 | -1.3 |
| hsa-miR-30a-5p    | 3.6E-01 | 4.6E-01 | -1.3 |
| hsa-miR-30d-3p    | 4.4E-01 | 5.3E-01 | -1.3 |
| hsa-miR-1274b     | 2.9E-01 | 3.9E-01 | -1.4 |
| hsa-miR-331-3p    | 2.7E-01 | 3.7E-01 | -1.4 |
| hsa-miR-98-5p     | 3.6E-01 | 4.6E-01 | -1.4 |
| hsa-miR-181a-2-3p | 3.2E-01 | 4.1E-01 | -1.4 |
| hsa-miR-140-5p    | 2.4E-01 | 3.5E-01 | -1.4 |
| hsa-miR-425-3p    | 4.1E-01 | 4.9E-01 | -1.4 |
| hsa-miR-484       | 2.8E-01 | 3.8E-01 | -1.4 |
| hsa-miR-301a-3p   | 2.8E-01 | 3.8E-01 | -1.4 |
| hsa-miR-193a-3p   | 2.4E-01 | 3.5E-01 | -1.4 |
| hsa-miR-590-5p    | 2.2E-01 | 3.3E-01 | -1.4 |
| hsa-miR-340-3p    | 2.1E-01 | 3.1E-01 | -1.4 |
| hsa-miR-335-3p    | 3.2E-01 | 4.1E-01 | -1.4 |
| hsa-miR-218-5p    | 2.5E-01 | 3.6E-01 | -1.4 |

|                 |         |         |      |
|-----------------|---------|---------|------|
| hsa-miR-30a-3p  | 2.6E-01 | 3.7E-01 | -1.4 |
| hsa-miR-497-5p  | 3.1E-01 | 4.1E-01 | -1.5 |
| hsa-miR-126-3p  | 2.0E-01 | 3.1E-01 | -1.5 |
| hsa-miR-550a-3p | 2.7E-01 | 3.8E-01 | -1.5 |
| hsa-miR-148b-5p | 3.0E-01 | 3.9E-01 | -1.5 |
| hsa-miR-320b    | 1.4E-01 | 2.4E-01 | -1.5 |
| hsa-miR-125a-5p | 2.2E-01 | 3.3E-01 | -1.5 |
| hsa-miR-181a-3p | 2.4E-01 | 3.5E-01 | -1.5 |
| hsa-miR-374b-5p | 1.4E-01 | 2.4E-01 | -1.5 |
| hsa-miR-214-3p  | 2.2E-01 | 3.3E-01 | -1.5 |
| hsa-miR-195-5p  | 2.3E-01 | 3.4E-01 | -1.5 |
| hsa-miR-532-3p  | 8.9E-02 | 1.7E-01 | -1.5 |
| hsa-miR-452-5p  | 3.0E-01 | 3.9E-01 | -1.5 |
| hsa-miR-126-5p  | 1.5E-01 | 2.4E-01 | -1.5 |
| hsa-miR-204-5p  | 3.3E-01 | 4.2E-01 | -1.6 |
| hsa-miR-30e-3p  | 1.6E-01 | 2.5E-01 | -1.6 |
| hsa-miR-19a-3p  | 8.9E-02 | 1.7E-01 | -1.6 |
| hsa-miR-324-3p  | 9.8E-02 | 1.8E-01 | -1.6 |
| hsa-miR-1290    | 1.4E-01 | 2.4E-01 | -1.6 |
| hsa-miR-486-3p  | 1.6E-01 | 2.6E-01 | -1.6 |
| hsa-miR-149-5p  | 1.4E-01 | 2.3E-01 | -1.6 |
| hsa-miR-1274a   | 2.7E-01 | 3.8E-01 | -1.6 |
| hsa-miR-19b-3p  | 7.8E-02 | 1.6E-01 | -1.6 |
| hsa-miR-223-3p  | 1.6E-01 | 2.5E-01 | -1.7 |
| hsa-miR-27b-5p  | 1.0E-01 | 1.9E-01 | -1.7 |
| hsa-miR-132-3p  | 9.3E-02 | 1.8E-01 | -1.7 |
| hsa-miR-17-5p   | 5.9E-02 | 1.4E-01 | -1.7 |
| hsa-let-7d-5p   | 1.3E-01 | 2.3E-01 | -1.7 |
| hsa-miR-20a-5p  | 6.0E-02 | 1.4E-01 | -1.7 |
| hsa-miR-590-3p  | 6.4E-02 | 1.4E-01 | -1.7 |
| hsa-miR-106a-5p | 5.1E-02 | 1.3E-01 | -1.7 |
| hsa-miR-99b-5p  | 8.2E-02 | 1.6E-01 | -1.7 |
| hsa-miR-500a-5p | 1.3E-01 | 2.3E-01 | -1.7 |
| hsa-miR-193b-3p | 5.9E-02 | 1.4E-01 | -1.7 |
| hsa-miR-181a-5p | 8.6E-02 | 1.7E-01 | -1.7 |
| hsa-miR-491-5p  | 1.0E-01 | 1.9E-01 | -1.7 |
| hsa-miR-144-5p  | 1.1E-01 | 2.0E-01 | -1.8 |
| hsa-let-7g-5p   | 7.8E-02 | 1.6E-01 | -1.8 |
| hsa-miR-490-3p  | 1.5E-01 | 2.4E-01 | -1.8 |
| hsa-miR-199a-3p | 1.2E-01 | 2.1E-01 | -1.8 |
| hsa-miR-660-5p  | 6.4E-02 | 1.4E-01 | -1.8 |
| hsa-miR-495-3p  | 1.0E-01 | 1.9E-01 | -1.8 |
| hsa-miR-136-3p  | 7.0E-02 | 1.5E-01 | -1.8 |
| hsa-miR-30b-5p  | 6.9E-02 | 1.5E-01 | -1.8 |
| hsa-miR-26b-5p  | 5.2E-02 | 1.3E-01 | -1.9 |
| hsa-miR-139-5p  | 6.4E-02 | 1.4E-01 | -1.9 |
| hsa-miR-34a-5p  | 2.7E-01 | 3.8E-01 | -1.9 |
| hsa-miR-29a-5p  | 1.1E-01 | 2.0E-01 | -1.9 |
| hsa-miR-100-5p  | 1.1E-01 | 2.0E-01 | -1.9 |
| hsa-miR-194-5p  | 5.8E-02 | 1.4E-01 | -2.0 |
| hsa-miR-148b-3p | 5.9E-02 | 1.4E-01 | -2.1 |
| hsa-miR-130a-3p | 8.0E-02 | 1.6E-01 | -2.1 |

|                 |         |         |      |
|-----------------|---------|---------|------|
| hsa-miR-128-3p  | 6.8E-02 | 1.4E-01 | -2.1 |
| hsa-miR-29c-5p  | 5.4E-02 | 1.3E-01 | -2.2 |
| hsa-miR-29b-3p  | 6.6E-02 | 1.4E-01 | -2.3 |
| hsa-miR-208b-3p | 5.5E-02 | 1.4E-01 | -2.3 |
| hsa-miR-135a-5p | 1.3E-01 | 2.2E-01 | -2.5 |
| hsa-miR-652-3p  | 5.1E-02 | 1.3E-01 | -2.5 |
| hsa-miR-939-5p  | 4.0E-01 | 4.8E-01 | -2.5 |
| hsa-miR-367-3p  | 1.3E-01 | 2.2E-01 | -2.6 |
| hsa-miR-214-5p  | 7.5E-02 | 1.6E-01 | -2.6 |
| hsa-miR-302c-3p | 9.5E-02 | 1.8E-01 | -2.6 |
| hsa-miR-618     | 6.4E-02 | 1.4E-01 | -2.9 |
| hsa-miR-483-3p  | 7.9E-02 | 1.6E-01 | -4.5 |

---
