# Supplementary material for: miRNAs may play a major role in the control of gene expression in key pathobiological processes in Chagas disease cardiomyopathy
Source: PubMed Central journal article supplement (PMC7787679; doi:10.1371/journal.pntd.0008889), 2020-12-22
Supplement: pntd.0008889.s008.pdf [file pntd.0008889.s008.pdf]

**S8 table.** Correlation between DEG/DEM and the age of the patients.

|            | <b>No correlation</b><br>(pvalue > 0.05) |                | <b>Weak correlation</b><br>( corr  < 0.6 &<br>pvalue <= 0.05) |                | <b>Moderate correlation</b><br>(0.6 <=  corr  < 0.8 &<br>pvalue <= 0.05) |                | <b>Strong correlation</b><br>(0.8 <=  corr  &<br>pvalue <= 0.05) |                |
|------------|------------------------------------------|----------------|---------------------------------------------------------------|----------------|--------------------------------------------------------------------------|----------------|------------------------------------------------------------------|----------------|
|            | <i>Number</i>                            | <i>Percent</i> | <i>Number</i>                                                 | <i>Percent</i> | <i>Number</i>                                                            | <i>Percent</i> | <i>Number</i>                                                    | <i>Percent</i> |
| <b>DEG</b> | 577                                      | 37.62%         | 358                                                           | 23.34%         | 590                                                                      | 38.46%         | 9                                                                | 0.59%          |
| <b>DEM</b> | 72                                       | 100%           | 0                                                             | 100%           | 0                                                                        | 100%           | 0                                                                | 100%           |

The age correlated genes are : JAKMIP1, TRIM34, RAC2, CLEC4D, GFRA2, LAIR2, CYSLTR1, GTSF1 and CD200R1.
