# Supplementary material for: miRNAs may play a major role in the control of gene expression in key pathobiological processes in Chagas disease cardiomyopathy
Source: PubMed Central journal article supplement (PMC7787679; doi:10.1371/journal.pntd.0008889), 2020-12-22
Supplement: pntd.0008889.s009.pdf [file pntd.0008889.s009.pdf]

**S9 table.** DEM-DEG interactions in CCC myocardium.

| ID             | p-value | Fold Change | Source                             | Confidence                               | Symbol        | p-value | Fold Change | Entrez Gene Name                                          |
|----------------|---------|-------------|------------------------------------|------------------------------------------|---------------|---------|-------------|-----------------------------------------------------------|
| hsa-miR-1-3p   | 5.0E-03 | -2.7        | TarBase                            | Experimentally Observed                  | ANPEP         | 7.3E-03 | 4.5         | alanyl aminopeptidase, membrane                           |
| hsa-miR-1-3p   | 5.0E-03 | -2.7        | TarBase,TargetScan Human,miRecords | Experimentally Observed,High (predicted) | CCSAP         | 1.4E-02 | 2.5         | centriole, cilia and spindle associated protein           |
| hsa-miR-1-3p   | 5.0E-03 | -2.7        | TarBase,miRecords                  | Experimentally Observed                  | EML4          | 2.9E-02 | 2.3         | echinoderm microtubule associated protein like 4          |
| hsa-miR-1-3p   | 5.0E-03 | -2.7        | TargetScan Human,miRecords         | Experimentally Observed,High (predicted) | IGF1          | 1.1E-02 | 2.7         | insulin like growth factor 1                              |
| hsa-miR-1-3p   | 5.0E-03 | -2.7        | TargetScan Human                   | High (predicted)                         | MT1F          | 3.7E-02 | 2.8         | metallothionein 1F                                        |
| hsa-miR-1-3p   | 5.0E-03 | -2.7        | TargetScan Human                   | High (predicted)                         | NFATC2        | 1.6E-02 | 3.0         | nuclear factor of activated T-cells 2                     |
| hsa-miR-1-3p   | 5.0E-03 | -2.7        | TarBase,TargetScan Human           | Experimentally Observed                  | NOTCH2        | 2.4E-02 | 2.3         | notch 2                                                   |
| hsa-miR-1-3p   | 5.0E-03 | -2.7        | TarBase,TargetScan Human,miRecords | Experimentally Observed                  | OSBPL7        | 3.5E-03 | 2.3         | oxysterol binding protein like 7                          |
| hsa-miR-1-3p   | 5.0E-03 | -2.7        | TargetScan Human                   | High (predicted)                         | SAMSN1        | 9.6E-03 | 7.4         | SAM domain, SH3 domain and nuclear localization signals 1 |
| hsa-miR-1-3p   | 5.0E-03 | -2.7        | TarBase,miRecords                  | Experimentally Observed                  | SHTN1         | 4.0E-02 | 2.3         | shootin 1                                                 |
| hsa-miR-1-3p   | 5.0E-03 | -2.7        | TarBase,miRecords                  | Experimentally Observed                  | SLC16A9       | 5.1E-03 | 5.3         | solute carrier family 16 member 9                         |
| hsa-miR-1-3p   | 5.0E-03 | -2.7        | TarBase,TargetScan Human           | Experimentally Observed,High (predicted) | TMSB10/TMSB4X | 1.3E-02 | 2.0         | thymosin beta 4, X-linked                                 |
| hsa-miR-1-3p   | 5.0E-03 | -2.7        | TargetScan Human                   | High (predicted)                         | TNFAIP8L2     | 2.6E-02 | 4.1         | TNF alpha induced protein 8 like 2                        |
| hsa-miR-1-3p   | 5.0E-03 | -2.7        | TarBase                            | Experimentally Observed                  | UNC93B1       | 1.3E-02 | 2.3         | unc-93 homolog B1 (C. elegans)                            |
| hsa-miR-99a-5p | 1.4E-02 | -2.9        | TargetScan Human                   | High (predicted)                         | NFE2L3        | 4.0E-02 | 2.4         | nuclear factor, erythroid 2 like 3                        |

|                 |         |      |                  |                         |           |         |      |                                                          |
|-----------------|---------|------|------------------|-------------------------|-----------|---------|------|----------------------------------------------------------|
| hsa-miR-99a-5p  | 1.4E-02 | -2.9 | TargetScan Human | High (predicted)        | RHEBL1    | 9.1E-03 | 2.4  | Ras homolog enriched in brain like 1                     |
| hsa-miR-99a-5p  | 1.4E-02 | -2.9 | TargetScan Human | High (predicted)        | SPN       | 2.0E-02 | 2.4  | sialoporphin                                             |
| hsa-miR-99a-5p  | 1.4E-02 | -2.9 | TargetScan Human | High (predicted)        | VNN1      | 3.6E-02 | 4.3  | vanin 1                                                  |
| hsa-miR-101-3p  | 4.2E-02 | -2.9 | TargetScan Human | High (predicted)        | AP1S3     | 1.6E-02 | 2.2  | adaptor related protein complex 1 sigma 3 subunit        |
| hsa-miR-101-3p  | 4.2E-02 | -2.9 | TargetScan Human | High (predicted)        | ASPN      | 5.6E-03 | 5.0  | asporin                                                  |
| hsa-miR-101-3p  | 4.2E-02 | -2.9 | TargetScan Human | High (predicted)        | COTL1     | 1.8E-02 | 3.9  | coactosin like F-actin binding protein 1                 |
| hsa-miR-101-3p  | 4.2E-02 | -2.9 | TargetScan Human | High (predicted)        | DDIT4     | 6.6E-03 | 4.0  | DNA damage inducible transcript 4                        |
| hsa-miR-101-3p  | 4.2E-02 | -2.9 | miRecords        | Experimentally Observed | ICOS      | 6.7E-03 | 5.0  | inducible T-cell costimulator                            |
| hsa-miR-101-3p  | 4.2E-02 | -2.9 | TargetScan Human | High (predicted)        | MYRIP     | 3.9E-02 | 3.1  | myosin VIIA and Rab interacting protein                  |
| hsa-miR-101-3p  | 4.2E-02 | -2.9 | TargetScan Human | High (predicted)        | UTS2B     | 3.0E-02 | 2.5  | urotensin 2B                                             |
| hsa-miR-103a-3p | 2.6E-02 | -2.1 | TargetScan Human | High (predicted)        | BTLA      | 2.4E-03 | 8.6  | B and T lymphocyte associated                            |
| hsa-miR-103a-3p | 2.6E-02 | -2.1 | TargetScan Human | High (predicted)        | CAPN12    | 2.4E-02 | 3.4  | calpain 12                                               |
| hsa-miR-103a-3p | 2.6E-02 | -2.1 | TargetScan Human | High (predicted)        | CRYBG1    | 2.5E-04 | 5.8  | crystallin beta-gamma domain containing 1                |
| hsa-miR-103a-3p | 2.6E-02 | -2.1 | TargetScan Human | High (predicted)        | GPC6      | 3.6E-03 | 4.0  | glypican 6                                               |
| hsa-miR-103a-3p | 2.6E-02 | -2.1 | TargetScan Human | High (predicted)        | GRAP2     | 2.9E-03 | 2.4  | GRB2-related adaptor protein 2                           |
| hsa-miR-103a-3p | 2.6E-02 | -2.1 | TargetScan Human | High (predicted)        | HAUS5     | 2.7E-02 | 2.8  | HAUS augmin like complex subunit 5                       |
| hsa-miR-103a-3p | 2.6E-02 | -2.1 | TargetScan Human | High (predicted)        | HELLS     | 2.3E-02 | 3.3  | helicase, lymphoid-specific                              |
| hsa-miR-103a-3p | 2.6E-02 | -2.1 | miRecords        | Experimentally Observed | ICOS      | 6.7E-03 | 5.0  | inducible T-cell costimulator                            |
| hsa-miR-103a-3p | 2.6E-02 | -2.1 | TargetScan Human | High (predicted)        | JAKMIP2   | 2.2E-03 | 5.4  | janus kinase and microtubule interacting protein 2       |
| hsa-miR-103a-3p | 2.6E-02 | -2.1 | TargetScan Human | High (predicted)        | KLRB1     | 5.8E-04 | 17.7 | killer cell lectin like receptor B1                      |
| hsa-miR-103a-3p | 2.6E-02 | -2.1 | TargetScan Human | High (predicted)        | NPAS3     | 1.2E-02 | 2.3  | neuronal PAS domain protein 3                            |
| hsa-miR-103a-3p | 2.6E-02 | -2.1 | TargetScan Human | High (predicted)        | P2RY12    | 1.9E-03 | 5.1  | purinergic receptor P2Y12                                |
| hsa-miR-103a-3p | 2.6E-02 | -2.1 | TargetScan Human | High (predicted)        | PABPC1L   | 6.4E-03 | 3.9  | poly(A) binding protein cytoplasmic 1 like               |
| hsa-miR-103a-3p | 2.6E-02 | -2.1 | TargetScan Human | High (predicted)        | PPP6R2    | 3.4E-02 | 2.4  | protein phosphatase 6 regulatory subunit 2               |
| hsa-miR-103a-3p | 2.6E-02 | -2.1 | TargetScan Human | High (predicted)        | SH3BP5    | 3.8E-02 | 2.2  | SH3 domain binding protein 5                             |
| hsa-miR-103a-3p | 2.6E-02 | -2.1 | TargetScan Human | High (predicted)        | SLA2      | 9.5E-03 | 5.0  | Src like adaptor 2                                       |
| hsa-miR-103a-3p | 2.6E-02 | -2.1 | TargetScan Human | High (predicted)        | TGFBR2    | 4.8E-02 | 3.3  | transforming growth factor beta receptor 2               |
| hsa-miR-103a-3p | 2.6E-02 | -2.1 | TargetScan Human | High (predicted)        | TMEM254   | 4.8E-02 | 2.3  | transmembrane protein 254                                |
| hsa-miR-103a-3p | 2.6E-02 | -2.1 | TargetScan Human | High (predicted)        | TRANK1    | 3.4E-02 | 3.1  | tetratricopeptide repeat and ankyrin repeat containing 1 |
| hsa-miR-103a-3p | 2.6E-02 | -2.1 | TargetScan Human | High (predicted)        | TSPAN5    | 4.6E-03 | 3.5  | tetraspanin 5                                            |
| hsa-miR-1233-3p | 7.6E-03 | -2.5 | TargetScan Human | High (predicted)        | BMF       | 6.4E-03 | 3.1  | Bcl2 modifying factor                                    |
| hsa-miR-1233-3p | 7.6E-03 | -2.5 | TargetScan Human | High (predicted)        | C10orf105 | 1.5E-02 | 4.2  | chromosome 10 open reading frame 105                     |

|                 |         |      |                                            |                                          |         |         |      |                                                            |
|-----------------|---------|------|--------------------------------------------|------------------------------------------|---------|---------|------|------------------------------------------------------------|
| hsa-miR-1233-3p | 7.6E-03 | -2.5 | TargetScan Human                           | High (predicted)                         | CCL14   | 2.5E-02 | 4.1  | C-C motif chemokine ligand 14                              |
| hsa-miR-1233-3p | 7.6E-03 | -2.5 | TargetScan Human                           | High (predicted)                         | CCL28   | 3.5E-03 | 4.5  | C-C motif chemokine ligand 28                              |
| hsa-miR-1233-3p | 7.6E-03 | -2.5 | TargetScan Human                           | High (predicted)                         | CLEC4D  | 2.1E-03 | 7.9  | C-type lectin domain family 4 member D                     |
| hsa-miR-1233-3p | 7.6E-03 | -2.5 | TargetScan Human                           | High (predicted)                         | DENND2D | 1.5E-03 | 6.2  | DENN domain containing 2D                                  |
| hsa-miR-1233-3p | 7.6E-03 | -2.5 | TargetScan Human                           | High (predicted)                         | GRAP2   | 2.9E-03 | 2.4  | GRB2-related adaptor protein 2                             |
| hsa-miR-1233-3p | 7.6E-03 | -2.5 | TargetScan Human                           | High (predicted)                         | LRRC17  | 4.0E-04 | 5.4  | leucine rich repeat containing 17                          |
| hsa-miR-1233-3p | 7.6E-03 | -2.5 | TargetScan Human                           | High (predicted)                         | PIK3IP1 | 1.1E-03 | 5.6  | phosphoinositide-3-kinase interacting protein 1            |
| hsa-miR-1233-3p | 7.6E-03 | -2.5 | TargetScan Human                           | High (predicted)                         | SH2D1A  | 5.7E-05 | 11.6 | SH2 domain containing 1A                                   |
| hsa-miR-1233-3p | 7.6E-03 | -2.5 | TargetScan Human                           | High (predicted)                         | TIFAB   | 1.2E-03 | 16.9 | TIFA inhibitor                                             |
| hsa-miR-1233-3p | 7.6E-03 | -2.5 | TargetScan Human                           | High (predicted)                         | UBE2L6  | 4.9E-02 | 2.1  | ubiquitin conjugating enzyme E2 L6                         |
| hsa-miR-125b-5p | 4.6E-02 | -2.3 | TargetScan Human                           | High (predicted)                         | ATP10D  | 2.2E-03 | 2.9  | ATPase phospholipid transporting 10D (putative)            |
| hsa-miR-125b-5p | 4.6E-02 | -2.3 | TargetScan Human                           | High (predicted)                         | BIN2    | 3.4E-04 | 11.5 | bridging integrator 2                                      |
| hsa-miR-125b-5p | 4.6E-02 | -2.3 | TargetScan Human,miRecords                 | Experimentally Observed,High (predicted) | BMF     | 6.4E-03 | 3.1  | Bcl2 modifying factor                                      |
| hsa-miR-125b-5p | 4.6E-02 | -2.3 | Ingenuity Expert Findings,TargetScan Human | Experimentally Observed,High (predicted) | CCR5    | 7.6E-04 | 13.5 | C-C motif chemokine receptor 5 (gene/pseudogene)           |
| hsa-miR-125b-5p | 4.6E-02 | -2.3 | TargetScan Human                           | High (predicted)                         | CD69    | 1.3E-05 | 20.0 | CD69 molecule                                              |
| hsa-miR-125b-5p | 4.6E-02 | -2.3 | miRecords                                  | Experimentally Observed                  | CDKN2A  | 4.8E-03 | 4.7  | cyclin dependent kinase inhibitor 2A                       |
| hsa-miR-125b-5p | 4.6E-02 | -2.3 | TargetScan Human                           | High (predicted)                         | GCNT1   | 4.5E-03 | 4.0  | glucosaminyl (N-acetyl) transferase 1, core 2              |
| hsa-miR-125b-5p | 4.6E-02 | -2.3 | TargetScan Human                           | High (predicted)                         | GMIP    | 5.3E-03 | 4.1  | GEM interacting protein                                    |
| hsa-miR-125b-5p | 4.6E-02 | -2.3 | TargetScan Human,miRecords                 | Experimentally Observed                  | GPR160  | 3.0E-03 | 2.7  | G protein-coupled receptor 160                             |
| hsa-miR-125b-5p | 4.6E-02 | -2.3 | TargetScan Human                           | High (predicted)                         | IRF4    | 3.5E-03 | 6.0  | interferon regulatory factor 4                             |
| hsa-miR-125b-5p | 4.6E-02 | -2.3 | TargetScan Human                           | High (predicted)                         | KLHL6   | 2.0E-02 | 4.5  | kelch like family member 6                                 |
| hsa-miR-125b-5p | 4.6E-02 | -2.3 | TargetScan Human                           | High (predicted)                         | NPL     | 4.6E-02 | 2.8  | N-acetylneuraminate pyruvate lyase                         |
| hsa-miR-125b-5p | 4.6E-02 | -2.3 | TargetScan Human                           | High (predicted)                         | PRDM1   | 6.8E-05 | 26.8 | PR/SET domain 1                                            |
| hsa-miR-125b-5p | 4.6E-02 | -2.3 | TargetScan Human                           | High (predicted)                         | PSTPIP2 | 8.7E-03 | 4.5  | proline-serine-threonine phosphatase interacting protein 2 |
| hsa-miR-125b-5p | 4.6E-02 | -2.3 | TargetScan Human                           | High (predicted)                         | PTPN18  | 7.6E-03 | 2.4  | protein tyrosine phosphatase, non-receptor type 18         |
| hsa-miR-125b-5p | 4.6E-02 | -2.3 | TarBase                                    | Experimentally Observed                  | RHEBL1  | 9.1E-03 | 2.4  | Ras homolog enriched in brain like 1                       |

|                 |         |      |                                     |                         |                   |         |      |                                                           |
|-----------------|---------|------|-------------------------------------|-------------------------|-------------------|---------|------|-----------------------------------------------------------|
| hsa-miR-125b-5p | 4.6E-02 | -2.3 | TargetScan Human                    | High (predicted)        | SEMA4D            | 3.0E-03 | 8.8  | semaphorin 4D                                             |
| hsa-miR-125b-5p | 4.6E-02 | -2.3 | TargetScan Human                    | High (predicted)        | SLA2              | 9.5E-03 | 5.0  | Src like adaptor 2                                        |
| hsa-miR-125b-5p | 4.6E-02 | -2.3 | TargetScan Human                    | High (predicted)        | THEMIS2           | 1.5E-02 | 4.0  | thymocyte selection associated family member 2            |
| hsa-miR-125b-5p | 4.6E-02 | -2.3 | TargetScan Human                    | High (predicted)        | TIFAB             | 1.2E-03 | 16.9 | TIFA inhibitor                                            |
| hsa-miR-125b-5p | 4.6E-02 | -2.3 | TargetScan Human                    | High (predicted)        | TNFAIP3           | 8.7E-03 | 4.5  | TNF alpha induced protein 3                               |
| hsa-miR-125b-5p | 4.6E-02 | -2.3 | TargetScan Human                    | High (predicted)        | ZNF624            | 3.7E-02 | 2.2  | zinc finger protein 624                                   |
| hsa-miR-125b-5p | 4.6E-02 | -2.3 | TargetScan Human                    | High (predicted)        | ZSWIM5            | 5.5E-03 | 2.7  | zinc finger SWIM-type containing 5                        |
| hsa-miR-127-3p  | 4.0E-02 | -1.9 | TargetScan Human                    | High (predicted)        | HLA-DOA           | 5.4E-03 | 5.6  | major histocompatibility complex, class II, DO alpha      |
| hsa-miR-127-3p  | 4.0E-02 | -1.9 | TargetScan Human                    | High (predicted)        | PITX1             | 4.7E-02 | 3.5  | paired like homeodomain 1                                 |
| hsa-miR-127-3p  | 4.0E-02 | -1.9 | miRecords                           | Experimentally Observed | PRDM1             | 6.8E-05 | 26.8 | PR/SET domain 1                                           |
| hsa-miR-127-3p  | 4.0E-02 | -1.9 | TargetScan Human                    | High (predicted)        | SDC1              | 1.3E-02 | 3.7  | syndecan 1                                                |
| hsa-miR-127-3p  | 4.0E-02 | -1.9 | TargetScan Human                    | High (predicted)        | SMPD3             | 2.7E-04 | 19.1 | sphingomyelin phosphodiesterase 3                         |
| hsa-miR-127-3p  | 4.0E-02 | -1.9 | TargetScan Human                    | High (predicted)        | XRCC3             | 1.6E-02 | 2.0  | X-ray repair cross complementing 3                        |
| hsa-miR-212-3p  | 1.9E-02 | -2.6 | TargetScan Human                    | High (predicted)        | FOLR2             | 4.5E-02 | 3.0  | folate receptor beta                                      |
| hsa-miR-212-3p  | 1.9E-02 | -2.6 | TargetScan Human                    | High (predicted)        | MELK              | 2.4E-02 | 2.3  | maternal embryonic leucine zipper kinase                  |
| hsa-miR-212-3p  | 1.9E-02 | -2.6 | miRecords                           | Experimentally Observed | MMP9              | 3.6E-02 | 7.3  | matrix metalloproteinase 9                                |
| hsa-miR-133a-3p | 1.5E-02 | -2.4 | TargetScan Human                    | High (predicted)        | ANKRD44           | 1.0E-02 | 3.2  | ankyrin repeat domain 44                                  |
| hsa-miR-133a-3p | 1.5E-02 | -2.4 | TargetScan Human                    | High (predicted)        | CRTAM             | 3.2E-05 | 27.8 | cytotoxic and regulatory T-cell molecule                  |
| hsa-miR-133a-3p | 1.5E-02 | -2.4 | TargetScan Human                    | High (predicted)        | CXCL11            | 2.1E-02 | 14.7 | C-X-C motif chemokine ligand 11                           |
| hsa-miR-133a-3p | 1.5E-02 | -2.4 | TargetScan Human                    | High (predicted)        | EDEM1             | 6.4E-03 | 2.2  | ER degradation enhancing alpha-mannosidase like protein 1 |
| hsa-miR-133a-3p | 1.5E-02 | -2.4 | TargetScan Human                    | High (predicted)        | GZMM              | 2.4E-02 | 2.4  | granzyme M                                                |
| hsa-miR-133a-3p | 1.5E-02 | -2.4 | TargetScan Human                    | High (predicted)        | KLRC4-KLRK1/KLRK1 | 4.6E-05 | 14.5 | killer cell lectin like receptor K1                       |
| hsa-miR-133a-3p | 1.5E-02 | -2.4 | Ingenuity Expert Findings,miRecords | Experimentally Observed | RUNX2             | 4.4E-04 | 6.0  | runt related transcription factor 2                       |
| hsa-miR-133a-3p | 1.5E-02 | -2.4 | TargetScan Human                    | High (predicted)        | SCRG1             | 4.5E-02 | 3.3  | stimulator of chondrogenesis 1                            |
| hsa-miR-133a-3p | 1.5E-02 | -2.4 | TargetScan Human                    | High (predicted)        | SIMC1             | 1.4E-02 | 2.2  | SUMO interacting motifs containing 1                      |
| hsa-miR-143-3p  | 9.5E-03 | -3.6 | TargetScan Human                    | High (predicted)        | C1orf162          | 1.5E-03 | 4.3  | chromosome 1 open reading frame 162                       |
| hsa-miR-143-3p  | 9.5E-03 | -3.6 | TargetScan Human                    | High (predicted)        | DENND1C           | 1.3E-04 | 8.6  | DENN domain containing 1C                                 |
| hsa-miR-143-3p  | 9.5E-03 | -3.6 | TargetScan Human                    | High (predicted)        | HLA-DOA           | 5.4E-03 | 5.6  | major histocompatibility complex, class II, DO alpha      |

|                 |         |      |                            |                         |               |         |      |                                                       |
|-----------------|---------|------|----------------------------|-------------------------|---------------|---------|------|-------------------------------------------------------|
| hsa-miR-143-3p  | 9.5E-03 | -3.6 | TargetScan Human           | High (predicted)        | IL18          | 1.3E-02 | 4.8  | interleukin 18                                        |
| hsa-miR-143-3p  | 9.5E-03 | -3.6 | TargetScan Human           | High (predicted)        | MS4A14        | 4.7E-02 | 2.9  | membrane spanning 4-domains A14                       |
| hsa-miR-143-3p  | 9.5E-03 | -3.6 | TargetScan Human           | High (predicted)        | SELL          | 6.5E-03 | 8.1  | selectin L                                            |
| hsa-miR-143-3p  | 9.5E-03 | -3.6 | TargetScan Human           | High (predicted)        | SFRP4         | 1.7E-02 | 8.3  | secreted frizzled related protein 4                   |
| hsa-miR-143-3p  | 9.5E-03 | -3.6 | TargetScan Human           | High (predicted)        | TMEM154       | 3.1E-02 | 2.2  | transmembrane protein 154                             |
| hsa-miR-143-3p  | 9.5E-03 | -3.6 | TargetScan Human           | High (predicted)        | TSC22D3       | 3.1E-04 | 4.9  | TSC22 domain family member 3                          |
| hsa-miR-145-3p  | 3.9E-03 | -2.5 | TargetScan Human           | High (predicted)        | CD226         | 1.5E-03 | 6.5  | CD226 molecule                                        |
| hsa-miR-145-3p  | 3.9E-03 | -2.5 | TargetScan Human           | High (predicted)        | GFI1          | 3.8E-06 | 40.1 | growth factor independent 1 transcriptional repressor |
| hsa-miR-145-3p  | 3.9E-03 | -2.5 | TargetScan Human           | High (predicted)        | GZMK          | 1.1E-03 | 31.7 | granzyme K                                            |
| hsa-miR-145-5p  | 2.0E-03 | -3.0 | TargetScan Human           | High (predicted)        | GLIS1         | 1.0E-03 | 6.2  | GLIS family zinc finger 1                             |
| hsa-miR-145-5p  | 2.0E-03 | -3.0 | TargetScan Human           | High (predicted)        | KCNA4         | 1.6E-02 | 3.8  | potassium voltage-gated channel subfamily A member 4  |
| hsa-miR-145-5p  | 2.0E-03 | -3.0 | TargetScan Human           | High (predicted)        | MYO5A         | 2.2E-03 | 2.1  | myosin VA                                             |
| hsa-miR-145-5p  | 2.0E-03 | -3.0 | TarBase,miRecords          | Experimentally Observed | PARP8         | 9.0E-05 | 5.0  | poly(ADP-ribose) polymerase family member 8           |
| hsa-miR-145-5p  | 2.0E-03 | -3.0 | TargetScan Human           | High (predicted)        | SRGAP2        | 1.7E-02 | 2.1  | SLIT-ROBO Rho GTPase activating protein 2             |
| hsa-miR-145-5p  | 2.0E-03 | -3.0 | TargetScan Human           | High (predicted)        | ZNF169        | 1.3E-02 | 2.0  | zinc finger protein 169                               |
| hsa-miR-146a-5p | 3.3E-05 | 3.9  | TargetScan Human,miRecords | Experimentally Observed | CDKN3         | 1.4E-03 | -2.4 | cyclin dependent kinase inhibitor 3                   |
| hsa-miR-146a-5p | 3.3E-05 | 3.9  | TargetScan Human           | High (predicted)        | INO80D        | 8.1E-03 | -2.1 | INO80 complex subunit D                               |
| hsa-miR-148a-3p | 4.4E-02 | -2.6 | TargetScan Human           | High (predicted)        | ARRDC3        | 1.1E-02 | 3.0  | arrestin domain containing 3                          |
| hsa-miR-148a-3p | 4.4E-02 | -2.6 | TargetScan Human           | High (predicted)        | C11orf65      | 9.5E-03 | 2.4  | chromosome 11 open reading frame 65                   |
| hsa-miR-148a-3p | 4.4E-02 | -2.6 | TargetScan Human           | High (predicted)        | CCL14         | 2.5E-02 | 4.1  | C-C motif chemokine ligand 14                         |
| hsa-miR-148a-3p | 4.4E-02 | -2.6 | TargetScan Human           | High (predicted)        | CEBPE         | 4.3E-03 | 3.9  | CCAAT/enhancer binding protein epsilon                |
| hsa-miR-148a-3p | 4.4E-02 | -2.6 | TargetScan Human           | High (predicted)        | HLA-A         | 5.4E-03 | 2.2  | major histocompatibility complex, class I, A          |
| hsa-miR-148a-3p | 4.4E-02 | -2.6 | TargetScan Human           | High (predicted)        | HLA-DQB2      | 3.9E-02 | 3.6  | major histocompatibility complex, class II, DQ beta 2 |
| hsa-miR-148a-3p | 4.4E-02 | -2.6 | TargetScan Human           | High (predicted)        | MAFB          | 2.7E-02 | 3.1  | MAF bZIP transcription factor B                       |
| hsa-miR-148a-3p | 4.4E-02 | -2.6 | TargetScan Human           | High (predicted)        | NFE2L3        | 4.0E-02 | 2.4  | nuclear factor, erythroid 2 like 3                    |
| hsa-miR-148a-3p | 4.4E-02 | -2.6 | TargetScan Human           | High (predicted)        | PABPC1L       | 6.4E-03 | 3.9  | poly(A) binding protein cytoplasmic 1 like            |
| hsa-miR-148a-3p | 4.4E-02 | -2.6 | TargetScan Human           | High (predicted)        | PIK3IP1       | 1.1E-03 | 5.6  | phosphoinositide-3-kinase interacting protein 1       |
| hsa-miR-148a-3p | 4.4E-02 | -2.6 | TargetScan Human           | High (predicted)        | TMSB10/TMSB4X | 1.3E-02 | 2.0  | thymosin beta 4, X-linked                             |
| hsa-miR-148a-3p | 4.4E-02 | -2.6 | TargetScan Human           | High (predicted)        | ZNF226        | 4.1E-03 | 2.1  | zinc finger protein 226                               |
| hsa-miR-151a-3p | 2.5E-02 | -4.9 | TargetScan Human           | High (predicted)        | BTLA          | 2.4E-03 | 8.6  | B and T lymphocyte associated                         |

|                 |         |      |                                            |                                          |          |         |      |                                                            |
|-----------------|---------|------|--------------------------------------------|------------------------------------------|----------|---------|------|------------------------------------------------------------|
| hsa-miR-151a-3p | 2.5E-02 | -4.9 | TargetScan Human                           | High (predicted)                         | CD48     | 4.5E-05 | 25.7 | CD48 molecule                                              |
| hsa-miR-151a-3p | 2.5E-02 | -4.9 | TargetScan Human                           | High (predicted)                         | HMG2     | 1.9E-02 | 2.1  | high mobility group nucleosomal binding domain 2           |
| hsa-miR-151a-3p | 2.5E-02 | -4.9 | TargetScan Human                           | High (predicted)                         | SLA      | 1.3E-03 | 7.8  | Src like adaptor                                           |
| hsa-miR-151a-3p | 2.5E-02 | -4.9 | TargetScan Human                           | High (predicted)                         | ZMAT1    | 1.3E-02 | 3.3  | zinc finger matrin-type 1                                  |
| hsa-miR-151a-5p | 7.9E-03 | -2.3 | TargetScan Human                           | High (predicted)                         | BEND6    | 8.1E-03 | 4.8  | BEN domain containing 6                                    |
| hsa-miR-151a-5p | 7.9E-03 | -2.3 | TargetScan Human                           | High (predicted)                         | FANCA    | 1.4E-03 | 5.0  | Fanconi anemia complementation group A                     |
| hsa-miR-151a-5p | 7.9E-03 | -2.3 | TargetScan Human                           | High (predicted)                         | GGACT    | 2.9E-02 | 2.2  | gamma-glutamylamine cyclotransferase                       |
| hsa-miR-151a-5p | 7.9E-03 | -2.3 | TargetScan Human                           | High (predicted)                         | GNLY     | 5.1E-03 | 6.9  | granulysin                                                 |
| hsa-miR-151a-5p | 7.9E-03 | -2.3 | TargetScan Human                           | High (predicted)                         | SIGLEC1  | 1.7E-02 | 4.0  | sialic acid binding Ig like lectin 1                       |
| hsa-miR-155-5p  | 6.5E-05 | 3.8  | TargetScan Human                           | High (predicted)                         | CDX1     | 2.8E-02 | -2.1 | caudal type homeobox 1                                     |
| hsa-miR-155-5p  | 6.5E-05 | 3.8  | TarBase                                    | Experimentally Observed                  | MET      | 3.4E-03 | -2.5 | MET proto-oncogene, receptor tyrosine kinase               |
| hsa-miR-155-5p  | 6.5E-05 | 3.8  | TarBase                                    | Experimentally Observed                  | MSI2     | 1.5E-02 | -2.3 | musashi RNA binding protein 2                              |
| hsa-miR-155-5p  | 6.5E-05 | 3.8  | TarBase,TargetScan Human,miRecords         | Experimentally Observed                  | RHEB     | 2.7E-02 | -2.1 | Ras homolog enriched in brain                              |
| hsa-miR-155-5p  | 6.5E-05 | 3.8  | TargetScan Human                           | High (predicted)                         | SLCO5A1  | 2.5E-02 | -3.5 | solute carrier organic anion transporter family member 5A1 |
| hsa-miR-155-5p  | 6.5E-05 | 3.8  | TarBase,TargetScan Human                   | Experimentally Observed,High (predicted) | TRIP13   | 1.4E-02 | -2.3 | thyroid hormone receptor interactor 13                     |
| hsa-miR-155-5p  | 6.5E-05 | 3.8  | TargetScan Human                           | High (predicted)                         | WWC1     | 2.1E-02 | -3.4 | WW and C2 domain containing 1                              |
| hsa-miR-15a-5p  | 1.9E-02 | -2.2 | TargetScan Human                           | High (predicted)                         | BTLA     | 2.4E-03 | 8.6  | B and T lymphocyte associated                              |
| hsa-miR-15a-5p  | 1.9E-02 | -2.2 | TargetScan Human                           | High (predicted)                         | CNOT6L   | 3.9E-02 | 2.1  | CCR4-NOT transcription complex subunit 6 like              |
| hsa-miR-15a-5p  | 1.9E-02 | -2.2 | TargetScan Human                           | High (predicted)                         | FCRL2    | 4.4E-02 | 3.4  | Fc receptor like 2                                         |
| hsa-miR-15a-5p  | 1.9E-02 | -2.2 | Ingenuity Expert Findings,TargetScan Human | Experimentally Observed                  | FLT3     | 1.0E-02 | 5.9  | fms related tyrosine kinase 3                              |
| hsa-miR-15a-5p  | 1.9E-02 | -2.2 | TargetScan Human                           | High (predicted)                         | GPR171   | 8.8E-06 | 21.6 | G protein-coupled receptor 171                             |
| hsa-miR-15a-5p  | 1.9E-02 | -2.2 | TargetScan Human                           | High (predicted)                         | HLA-DQB2 | 3.9E-02 | 3.6  | major histocompatibility complex, class II, DQ beta 2      |
| hsa-miR-15a-5p  | 1.9E-02 | -2.2 | TargetScan Human                           | High (predicted)                         | HLA-F    | 1.7E-02 | 2.7  | major histocompatibility complex, class I, F               |
| hsa-miR-15a-5p  | 1.9E-02 | -2.2 | Ingenuity Expert Findings                  | Experimentally Observed                  | IGF1     | 1.1E-02 | 2.7  | insulin like growth factor 1                               |

|                 |         |      |                                            |                                          |          |         |      |                                                           |
|-----------------|---------|------|--------------------------------------------|------------------------------------------|----------|---------|------|-----------------------------------------------------------|
| hsa-miR-15a-5p  | 1.9E-02 | -2.2 | TargetScan Human                           | High (predicted)                         | ISLR     | 2.3E-02 | 3.5  | immunoglobulin superfamily containing leucine rich repeat |
| hsa-miR-15a-5p  | 1.9E-02 | -2.2 | TarBase,TargetScan Human                   | Experimentally Observed,High (predicted) | KCNN4    | 3.4E-02 | 3.8  | potassium calcium-activated channel subfamily N member 4  |
| hsa-miR-15a-5p  | 1.9E-02 | -2.2 | TargetScan Human                           | High (predicted)                         | LAMP3    | 1.1E-02 | 14.1 | lysosomal associated membrane protein 3                   |
| hsa-miR-15a-5p  | 1.9E-02 | -2.2 | miRecords                                  | Experimentally Observed                  | LDAH     | 4.1E-02 | 2.4  | lipid droplet associated hydrolase                        |
| hsa-miR-15a-5p  | 1.9E-02 | -2.2 | TargetScan Human                           | High (predicted)                         | LY9      | 2.0E-05 | 12.7 | lymphocyte antigen 9                                      |
| hsa-miR-15a-5p  | 1.9E-02 | -2.2 | TargetScan Human                           | High (predicted)                         | MTMR11   | 3.3E-02 | 2.1  | myotubularin related protein 11                           |
| hsa-miR-15a-5p  | 1.9E-02 | -2.2 | TargetScan Human,miRecords                 | Experimentally Observed,High (predicted) | MYB      | 3.2E-04 | 11.5 | MYB proto-oncogene, transcription factor                  |
| hsa-miR-15a-5p  | 1.9E-02 | -2.2 | TarBase,TargetScan Human                   | Experimentally Observed                  | NOTCH2   | 2.4E-02 | 2.3  | notch 2                                                   |
| hsa-miR-15a-5p  | 1.9E-02 | -2.2 | TarBase,TargetScan Human                   | Experimentally Observed,High (predicted) | RAB30    | 4.3E-03 | 2.0  | RAB30, member RAS oncogene family                         |
| hsa-miR-15a-5p  | 1.9E-02 | -2.2 | TargetScan Human                           | High (predicted)                         | SLIT2    | 1.6E-03 | 2.8  | slit guidance ligand 2                                    |
| hsa-miR-15a-5p  | 1.9E-02 | -2.2 | TargetScan Human                           | High (predicted)                         | SYNRG    | 9.2E-03 | 2.1  | synergin gamma                                            |
| hsa-miR-15a-5p  | 1.9E-02 | -2.2 | TargetScan Human                           | High (predicted)                         | TFCP2L1  | 3.3E-02 | 3.0  | transcription factor CP2 like 1                           |
| hsa-miR-15a-5p  | 1.9E-02 | -2.2 | TargetScan Human                           | High (predicted)                         | TNFSF13B | 5.5E-03 | 5.4  | TNF superfamily member 13b                                |
| hsa-miR-15a-5p  | 1.9E-02 | -2.2 | TargetScan Human                           | High (predicted)                         | TRANK1   | 3.4E-02 | 3.1  | tetratricopeptide repeat and ankyrin repeat containing 1  |
| hsa-miR-15a-5p  | 1.9E-02 | -2.2 | miRecords                                  | Experimentally Observed                  | WIPF1    | 4.8E-03 | 2.8  | WAS/WASL interacting protein family member 1              |
| hsa-miR-106b-5p | 3.0E-02 | -2.3 | TargetScan Human                           | High (predicted)                         | APCDD1   | 4.3E-02 | 2.0  | APC down-regulated 1                                      |
| hsa-miR-106b-5p | 3.0E-02 | -2.3 | Ingenuity Expert Findings,miRecords        | Experimentally Observed                  | BCL2L11  | 3.3E-02 | 2.4  | BCL2 like 11                                              |
| hsa-miR-106b-5p | 3.0E-02 | -2.3 | TargetScan Human                           | High (predicted)                         | CCNG2    | 3.8E-02 | 2.9  | cyclin G2                                                 |
| hsa-miR-106b-5p | 3.0E-02 | -2.3 | TargetScan Human                           | High (predicted)                         | CD69     | 1.3E-05 | 20.0 | CD69 molecule                                             |
| hsa-miR-106b-5p | 3.0E-02 | -2.3 | TargetScan Human                           | High (predicted)                         | CTSK     | 9.6E-03 | 3.0  | cathepsin K                                               |
| hsa-miR-106b-5p | 3.0E-02 | -2.3 | Ingenuity Expert Findings,TargetScan Human | Experimentally Observed                  | E2F2     | 2.7E-02 | 4.3  | E2F transcription factor 2                                |
| hsa-miR-106b-5p | 3.0E-02 | -2.3 | TargetScan Human                           | High (predicted)                         | NABP1    | 2.5E-02 | 3.6  | nucleic acid binding protein 1                            |
| hsa-miR-106b-5p | 3.0E-02 | -2.3 | TargetScan Human                           | High (predicted)                         | PDCD1LG2 | 3.3E-02 | 2.7  | programmed cell death 1 ligand 2                          |

|                 |         |      |                                                    |                                          |          |         |      |                                                       |
|-----------------|---------|------|----------------------------------------------------|------------------------------------------|----------|---------|------|-------------------------------------------------------|
| hsa-miR-106b-5p | 3.0E-02 | -2.3 | TargetScan Human                                   | High (predicted)                         | RASL11B  | 9.4E-03 | 6.0  | RAS like family 11 member B                           |
| hsa-miR-106b-5p | 3.0E-02 | -2.3 | TargetScan Human                                   | High (predicted)                         | STK17B   | 3.0E-02 | 3.0  | serine/threonine kinase 17b                           |
| hsa-miR-106b-5p | 3.0E-02 | -2.3 | Ingenuity Expert Findings,TarBase,TargetScan Human | Experimentally Observed,High (predicted) | TGFBR2   | 4.8E-02 | 3.3  | transforming growth factor beta receptor 2            |
| hsa-miR-185-5p  | 2.7E-02 | -2.6 | TargetScan Human                                   | High (predicted)                         | AIM2     | 2.7E-04 | 34.1 | absent in melanoma 2                                  |
| hsa-miR-185-5p  | 2.7E-02 | -2.6 | TargetScan Human                                   | High (predicted)                         | BTLA     | 2.4E-03 | 8.6  | B and T lymphocyte associated                         |
| hsa-miR-185-5p  | 2.7E-02 | -2.6 | TargetScan Human                                   | High (predicted)                         | CD40LG   | 5.8E-05 | 37.9 | CD40 ligand                                           |
| hsa-miR-185-5p  | 2.7E-02 | -2.6 | TargetScan Human                                   | High (predicted)                         | CD84     | 1.1E-04 | 11.1 | CD84 molecule                                         |
| hsa-miR-185-5p  | 2.7E-02 | -2.6 | TargetScan Human                                   | High (predicted)                         | CTSK     | 9.6E-03 | 3.0  | cathepsin K                                           |
| hsa-miR-185-5p  | 2.7E-02 | -2.6 | TargetScan Human                                   | High (predicted)                         | CXCL16   | 3.6E-02 | 3.0  | C-X-C motif chemokine ligand 16                       |
| hsa-miR-185-5p  | 2.7E-02 | -2.6 | TargetScan Human                                   | High (predicted)                         | CXCL9    | 3.9E-04 | 64.1 | C-X-C motif chemokine ligand 9                        |
| hsa-miR-185-5p  | 2.7E-02 | -2.6 | TargetScan Human                                   | High (predicted)                         | DOK3     | 3.1E-02 | 3.0  | docking protein 3                                     |
| hsa-miR-185-5p  | 2.7E-02 | -2.6 | TargetScan Human                                   | High (predicted)                         | LAMP5    | 2.8E-02 | 6.3  | lysosomal associated membrane protein family member 5 |
| hsa-miR-185-5p  | 2.7E-02 | -2.6 | TargetScan Human                                   | High (predicted)                         | NPL      | 4.6E-02 | 2.8  | N-acetylneuraminate pyruvate lyase                    |
| hsa-miR-185-5p  | 2.7E-02 | -2.6 | TargetScan Human                                   | High (predicted)                         | RAB30    | 4.3E-03 | 2.0  | RAB30, member RAS oncogene family                     |
| hsa-miR-185-5p  | 2.7E-02 | -2.6 | TargetScan Human                                   | High (predicted)                         | SAMD9L   | 2.9E-02 | 3.0  | sterile alpha motif domain containing 9 like          |
| hsa-miR-185-5p  | 2.7E-02 | -2.6 | TargetScan Human                                   | High (predicted)                         | SIMC1    | 1.4E-02 | 2.2  | SUMO interacting motifs containing 1                  |
| hsa-miR-185-5p  | 2.7E-02 | -2.6 | TargetScan Human                                   | High (predicted)                         | SLAMF6   | 1.4E-05 | 15.6 | SLAM family member 6                                  |
| hsa-miR-185-5p  | 2.7E-02 | -2.6 | TargetScan Human                                   | High (predicted)                         | TIFAB    | 1.2E-03 | 16.9 | TIFA inhibitor                                        |
| hsa-miR-185-5p  | 2.7E-02 | -2.6 | TargetScan Human                                   | High (predicted)                         | TNFSF13  | 2.9E-02 | 2.2  | TNF superfamily member 13                             |
| hsa-miR-185-5p  | 2.7E-02 | -2.6 | TargetScan Human                                   | High (predicted)                         | TRIM14   | 6.7E-04 | 6.8  | tripartite motif containing 14                        |
| hsa-miR-185-5p  | 2.7E-02 | -2.6 | TargetScan Human                                   | High (predicted)                         | TRIM66   | 3.5E-02 | 3.1  | tripartite motif containing 66                        |
| hsa-miR-185-5p  | 2.7E-02 | -2.6 | TargetScan Human                                   | High (predicted)                         | ZNF226   | 4.1E-03 | 2.1  | zinc finger protein 226                               |
| hsa-miR-185-5p  | 2.7E-02 | -2.6 | TargetScan Human                                   | High (predicted)                         | ZNF831   | 1.7E-05 | 37.4 | zinc finger protein 831                               |
| hsa-miR-192-5p  | 3.0E-02 | -1.9 | TargetScan Human                                   | High (predicted)                         | ADGRG6   | 3.6E-03 | 3.7  | adhesion G protein-coupled receptor G6                |
| hsa-miR-192-5p  | 3.0E-02 | -1.9 | TargetScan Human                                   | High (predicted)                         | CATSPER2 | 4.0E-02 | 2.1  | cation channel sperm associated 2                     |
| hsa-miR-192-5p  | 3.0E-02 | -1.9 | TargetScan Human                                   | High (predicted)                         | CD48     | 4.5E-05 | 25.7 | CD48 molecule                                         |
| hsa-miR-192-5p  | 3.0E-02 | -1.9 | TargetScan Human                                   | High (predicted)                         | JCHAIN   | 1.9E-06 | 72.7 | joining chain of multimeric IgA and IgM               |
| hsa-miR-192-5p  | 3.0E-02 | -1.9 | TargetScan Human                                   | High (predicted)                         | SLAMF7   | 3.0E-05 | 41.0 | SLAM family member 7                                  |
| hsa-miR-193a-5p | 4.7E-02 | -1.7 | TargetScan Human                                   | High (predicted)                         | BCL2L11  | 3.3E-02 | 2.4  | BCL2 like 11                                          |
| hsa-miR-193a-5p | 4.7E-02 | -1.7 | TargetScan Human                                   | High (predicted)                         | C1orf186 | 5.4E-03 | 5.9  | chromosome 1 open reading frame 186                   |
| hsa-miR-193a-5p | 4.7E-02 | -1.7 | TargetScan Human                                   | High (predicted)                         | CD27     | 6.7E-05 | 14.9 | CD27 molecule                                         |
| hsa-miR-193a-5p | 4.7E-02 | -1.7 | TargetScan Human                                   | High (predicted)                         | CSF2RA   | 2.1E-05 | 6.1  | colony stimulating factor 2 receptor alpha subunit    |

|                  |         |      |                           |                         |           |         |      |                                                    |
|------------------|---------|------|---------------------------|-------------------------|-----------|---------|------|----------------------------------------------------|
| hsa-miR-193a-5p  | 4.7E-02 | -1.7 | Ingenuity Expert Findings | Experimentally Observed | IL2RG     | 1.9E-05 | 14.9 | interleukin 2 receptor subunit gamma               |
| hsa-miR-193a-5p  | 4.7E-02 | -1.7 | TargetScan Human          | High (predicted)        | KLRD1     | 5.0E-05 | 16.5 | killer cell lectin like receptor D1                |
| hsa-miR-193a-5p  | 4.7E-02 | -1.7 | TargetScan Human          | High (predicted)        | OMD       | 8.6E-03 | 4.8  | osteomodulin                                       |
| hsa-miR-193a-5p  | 4.7E-02 | -1.7 | TargetScan Human          | High (predicted)        | TRAT1     | 1.2E-04 | 18.8 | T-cell receptor associated transmembrane adaptor 1 |
| hsa-miR-19b-1-5p | 1.6E-02 | -2.5 | TargetScan Human          | High (predicted)        | CSF2RA    | 2.1E-05 | 6.1  | colony stimulating factor 2 receptor alpha subunit |
| hsa-miR-19b-1-5p | 1.6E-02 | -2.5 | TargetScan Human          | High (predicted)        | CYTIP     | 3.8E-05 | 12.1 | cytohesin 1 interacting protein                    |
| hsa-miR-19b-1-5p | 1.6E-02 | -2.5 | TargetScan Human          | High (predicted)        | GPR174    | 5.4E-03 | 4.6  | G protein-coupled receptor 174                     |
| hsa-miR-19b-1-5p | 1.6E-02 | -2.5 | TargetScan Human          | High (predicted)        | HELLS     | 2.3E-02 | 3.3  | helicase, lymphoid-specific                        |
| hsa-miR-19b-1-5p | 1.6E-02 | -2.5 | TargetScan Human          | High (predicted)        | P2RY12    | 1.9E-03 | 5.1  | purinergic receptor P2Y12                          |
| hsa-miR-19b-1-5p | 1.6E-02 | -2.5 | TargetScan Human          | High (predicted)        | PIWIL4    | 3.5E-04 | 3.1  | piwi like RNA-mediated gene silencing 4            |
| hsa-miR-19b-1-5p | 1.6E-02 | -2.5 | TargetScan Human          | High (predicted)        | SLC18B1   | 9.9E-03 | 2.1  | solute carrier family 18 member B1                 |
| hsa-miR-203a-3p  | 4.2E-03 | -3.4 | Ingenuity Expert Findings | Experimentally Observed | RUNX2     | 4.4E-04 | 6.0  | runt related transcription factor 2                |
| hsa-miR-20a-3p   | 1.5E-02 | -2.1 | TargetScan Human          | High (predicted)        | ALOX5AP   | 3.0E-02 | 4.6  | arachidonate 5-lipoxygenase activating protein     |
| hsa-miR-20a-3p   | 1.5E-02 | -2.1 | TargetScan Human          | High (predicted)        | BATF      | 1.0E-03 | 13.3 | basic leucine zipper ATF-like transcription factor |
| hsa-miR-20a-3p   | 1.5E-02 | -2.1 | TargetScan Human          | High (predicted)        | CCL4      | 6.3E-06 | 20.7 | C-C motif chemokine ligand 4                       |
| hsa-miR-20a-3p   | 1.5E-02 | -2.1 | TargetScan Human          | High (predicted)        | CD160     | 2.5E-02 | 3.4  | CD160 molecule                                     |
| hsa-miR-20a-3p   | 1.5E-02 | -2.1 | TargetScan Human          | High (predicted)        | CFHR3     | 4.0E-02 | 3.0  | complement factor H related 3                      |
| hsa-miR-20a-3p   | 1.5E-02 | -2.1 | TargetScan Human          | High (predicted)        | HMGN2     | 1.9E-02 | 2.1  | high mobility group nucleosomal binding domain 2   |
| hsa-miR-20a-3p   | 1.5E-02 | -2.1 | TargetScan Human          | High (predicted)        | TRAF1     | 8.0E-04 | 5.1  | TNF receptor associated factor 1                   |
| hsa-miR-22-3p    | 7.3E-03 | -4.7 | TargetScan Human          | High (predicted)        | APCDD1L   | 4.5E-02 | 6.2  | APC down-regulated 1 like                          |
| hsa-miR-22-3p    | 7.3E-03 | -4.7 | TargetScan Human          | High (predicted)        | CSF1R     | 3.3E-03 | 4.7  | colony stimulating factor 1 receptor               |
| hsa-miR-22-3p    | 7.3E-03 | -4.7 | TargetScan Human          | High (predicted)        | DDIT4     | 6.6E-03 | 4.0  | DNA damage inducible transcript 4                  |
| hsa-miR-22-3p    | 7.3E-03 | -4.7 | TargetScan Human          | High (predicted)        | DERL3     | 1.9E-03 | 3.6  | derlin 3                                           |
| hsa-miR-22-3p    | 7.3E-03 | -4.7 | TargetScan Human          | High (predicted)        | GPR132    | 7.4E-03 | 3.3  | G protein-coupled receptor 132                     |
| hsa-miR-22-3p    | 7.3E-03 | -4.7 | TargetScan Human          | High (predicted)        | NELL2     | 2.5E-03 | 9.5  | neural EGFL like 2                                 |
| hsa-miR-22-3p    | 7.3E-03 | -4.7 | TargetScan Human          | High (predicted)        | NLRP3     | 1.4E-02 | 4.0  | NLR family pyrin domain containing 3               |
| hsa-miR-22-3p    | 7.3E-03 | -4.7 | TargetScan Human          | High (predicted)        | OGN       | 1.2E-02 | 7.0  | osteoglycin                                        |
| hsa-miR-22-3p    | 7.3E-03 | -4.7 | TargetScan Human          | High (predicted)        | PRKCB     | 4.1E-04 | 10.0 | protein kinase C beta                              |
| hsa-miR-22-3p    | 7.3E-03 | -4.7 | TargetScan Human          | High (predicted)        | RAB11FIP4 | 4.8E-02 | 3.2  | RAB11 family interacting protein 4                 |
| hsa-miR-22-3p    | 7.3E-03 | -4.7 | TargetScan Human          | High (predicted)        | RGS10     | 1.8E-02 | 3.4  | regulator of G protein signaling 10                |

|                |         |      |                                                      |                                          |         |         |      |                                                    |
|----------------|---------|------|------------------------------------------------------|------------------------------------------|---------|---------|------|----------------------------------------------------|
| hsa-miR-22-3p  | 7.3E-03 | -4.7 | TargetScan Human                                     | High (predicted)                         | TLR8    | 7.0E-03 | 7.1  | toll like receptor 8                               |
| hsa-miR-22-3p  | 7.3E-03 | -4.7 | TargetScan Human                                     | High (predicted)                         | ZNF594  | 2.2E-02 | 2.0  | zinc finger protein 594                            |
| hsa-miR-22-3p  | 7.3E-03 | -4.7 | TargetScan Human                                     | High (predicted)                         | ZNF599  | 2.4E-02 | 2.3  | zinc finger protein 599                            |
| hsa-miR-22-5p  | 3.8E-03 | -2.6 | TargetScan Human                                     | High (predicted)                         | JAKMIP2 | 2.2E-03 | 5.4  | janus kinase and microtubule interacting protein 2 |
| hsa-miR-22-5p  | 3.8E-03 | -2.6 | TargetScan Human                                     | High (predicted)                         | LAX1    | 9.8E-05 | 17.6 | lymphocyte transmembrane adaptor 1                 |
| hsa-miR-22-5p  | 3.8E-03 | -2.6 | TargetScan Human                                     | High (predicted)                         | RGS1    | 6.3E-04 | 19.4 | regulator of G protein signaling 1                 |
| hsa-miR-22-5p  | 3.8E-03 | -2.6 | TargetScan Human                                     | High (predicted)                         | SYNRG   | 9.2E-03 | 2.1  | synergin gamma                                     |
| hsa-miR-22-5p  | 3.8E-03 | -2.6 | TargetScan Human                                     | High (predicted)                         | ZBTB37  | 1.4E-02 | 2.4  | zinc finger and BTB domain containing 37           |
| hsa-miR-221-3p | 6.5E-03 | -4.3 | Ingenuity Expert Findings,miRecords                  | Experimentally Observed                  | BCL2L11 | 3.3E-02 | 2.4  | BCL2 like 11                                       |
| hsa-miR-221-3p | 6.5E-03 | -4.3 | TargetScan Human,miRecords                           | Experimentally Observed                  | BMF     | 6.4E-03 | 3.1  | Bcl2 modifying factor                              |
| hsa-miR-221-3p | 6.5E-03 | -4.3 | TargetScan Human                                     | High (predicted)                         | CXCL11  | 2.1E-02 | 14.7 | C-X-C motif chemokine ligand 11                    |
| hsa-miR-221-3p | 6.5E-03 | -4.3 | Ingenuity Expert Findings,TargetScan Human,miRecords | Experimentally Observed                  | DDIT4   | 6.6E-03 | 4.0  | DNA damage inducible transcript 4                  |
| hsa-miR-221-3p | 6.5E-03 | -4.3 | TargetScan Human                                     | High (predicted)                         | EVI2A   | 2.0E-03 | 6.7  | ecotropic viral integration site 2A                |
| hsa-miR-221-3p | 6.5E-03 | -4.3 | TargetScan Human                                     | High (predicted)                         | HNMT    | 1.9E-03 | 2.5  | histamine N-methyltransferase                      |
| hsa-miR-221-3p | 6.5E-03 | -4.3 | TargetScan Human                                     | High (predicted)                         | MS4A1   | 1.2E-02 | 5.1  | membrane spanning 4-domains A1                     |
| hsa-miR-221-3p | 6.5E-03 | -4.3 | TargetScan Human                                     | High (predicted)                         | NRK     | 4.6E-03 | 10.1 | Nik related kinase                                 |
| hsa-miR-221-3p | 6.5E-03 | -4.3 | Ingenuity Expert Findings,TargetScan Human           | Experimentally Observed,High (predicted) | PIK3R1  | 4.1E-02 | 2.7  | phosphoinositide-3-kinase regulatory subunit 1     |
| hsa-miR-221-3p | 6.5E-03 | -4.3 | TargetScan Human                                     | High (predicted)                         | TSC22D3 | 3.1E-04 | 4.9  | TSC22 domain family member 3                       |
| hsa-miR-221-3p | 6.5E-03 | -4.3 | TargetScan Human                                     | High (predicted)                         | ZBTB37  | 1.4E-02 | 2.4  | zinc finger and BTB domain containing 37           |
| hsa-miR-224-5p | 1.8E-02 | -3.2 | Ingenuity Expert Findings                            | Experimentally Observed                  | CD53    | 2.1E-03 | 8.2  | CD53 molecule                                      |
| hsa-miR-224-5p | 1.8E-02 | -3.2 | TargetScan Human                                     | High (predicted)                         | NPFFR2  | 7.1E-03 | 6.3  | neuropeptide FF receptor 2                         |
| hsa-miR-224-5p | 1.8E-02 | -3.2 | TargetScan Human                                     | High (predicted)                         | PARVG   | 3.9E-03 | 5.1  | parvin gamma                                       |
| hsa-miR-224-5p | 1.8E-02 | -3.2 | TargetScan Human                                     | High (predicted)                         | ZNF226  | 4.1E-03 | 2.1  | zinc finger protein 226                            |
| hsa-miR-23b-3p | 1.0E-02 | -3.2 | TargetScan Human                                     | High (predicted)                         | CCSAP   | 1.4E-02 | 2.5  | centriole, cilia and spindle associated protein    |
| hsa-miR-23b-3p | 1.0E-02 | -3.2 | TargetScan Human                                     | High (predicted)                         | CLDN14  | 5.3E-03 | 4.0  | claudin 14                                         |
| hsa-miR-23b-3p | 1.0E-02 | -3.2 | TargetScan Human                                     | High (predicted)                         | FUT4    | 4.2E-03 | 2.2  | fucosyltransferase 4                               |
| hsa-miR-23b-3p | 1.0E-02 | -3.2 | TargetScan Human                                     | High (predicted)                         | GALNT12 | 2.3E-02 | 2.9  | polypeptide N-acetylgalactosaminyltransferase 12   |

|                 |         |      |                   |                         |          |         |      |                                                  |
|-----------------|---------|------|-------------------|-------------------------|----------|---------|------|--------------------------------------------------|
| hsa-miR-23b-3p  | 1.0E-02 | -3.2 | TargetScan Human  | High (predicted)        | HMGN2    | 1.9E-02 | 2.1  | high mobility group nucleosomal binding domain 2 |
| hsa-miR-23b-3p  | 1.0E-02 | -3.2 | TargetScan Human  | High (predicted)        | IL18     | 1.3E-02 | 4.8  | interleukin 18                                   |
| hsa-miR-23b-3p  | 1.0E-02 | -3.2 | TargetScan Human  | High (predicted)        | KLRF1    | 1.6E-02 | 2.1  | killer cell lectin like receptor F1              |
| hsa-miR-23b-3p  | 1.0E-02 | -3.2 | TargetScan Human  | High (predicted)        | MRC1     | 1.6E-02 | 4.0  | mannose receptor C-type 1                        |
| hsa-miR-23b-3p  | 1.0E-02 | -3.2 | TargetScan Human  | High (predicted)        | NAP1L3   | 2.9E-02 | 8.7  | nucleosome assembly protein 1 like 3             |
| hsa-miR-23b-3p  | 1.0E-02 | -3.2 | TargetScan Human  | High (predicted)        | RAB39B   | 9.2E-05 | 14.8 | RAB39B, member RAS oncogene family               |
| hsa-miR-23b-3p  | 1.0E-02 | -3.2 | TargetScan Human  | High (predicted)        | RGS18    | 1.6E-03 | 7.4  | regulator of G protein signaling 18              |
| hsa-miR-23b-3p  | 1.0E-02 | -3.2 | TargetScan Human  | High (predicted)        | SCG5     | 3.6E-02 | 2.9  | secretogranin V                                  |
| hsa-miR-23b-3p  | 1.0E-02 | -3.2 | TargetScan Human  | High (predicted)        | ZNF287   | 3.5E-02 | 3.3  | zinc finger protein 287                          |
| hsa-miR-24-2-5p | 2.3E-02 | -2.1 | TargetScan Human  | High (predicted)        | BTK      | 3.4E-04 | 7.8  | Bruton tyrosine kinase                           |
| hsa-miR-24-2-5p | 2.3E-02 | -2.1 | TargetScan Human  | High (predicted)        | C16orf89 | 1.1E-02 | 5.4  | chromosome 16 open reading frame 89              |
| hsa-miR-24-2-5p | 2.3E-02 | -2.1 | TargetScan Human  | High (predicted)        | GPC6     | 3.6E-03 | 4.0  | glypican 6                                       |
| hsa-miR-24-2-5p | 2.3E-02 | -2.1 | TargetScan Human  | High (predicted)        | NUAK2    | 4.8E-02 | 2.1  | NUAK family kinase 2                             |
| hsa-miR-24-2-5p | 2.3E-02 | -2.1 | TargetScan Human  | High (predicted)        | PIF1     | 8.2E-03 | 3.0  | PIF1 5'-to-3' DNA helicase                       |
| hsa-miR-24-2-5p | 2.3E-02 | -2.1 | TargetScan Human  | High (predicted)        | TRIM14   | 6.7E-04 | 6.8  | tripartite motif containing 14                   |
| hsa-miR-24-2-5p | 2.3E-02 | -2.1 | TargetScan Human  | High (predicted)        | UBA7     | 8.6E-03 | 2.4  | ubiquitin like modifier activating enzyme 7      |
| hsa-miR-24-3p   | 3.9E-02 | -1.8 | TargetScan Human  | High (predicted)        | BCL2L11  | 3.3E-02 | 2.4  | BCL2 like 11                                     |
| hsa-miR-24-3p   | 3.9E-02 | -1.8 | TargetScan Human  | High (predicted)        | BHLHE22  | 3.9E-03 | 7.5  | basic helix-loop-helix family member e22         |
| hsa-miR-24-3p   | 3.9E-02 | -1.8 | TarBase,miRecords | Experimentally Observed | CDKN2A   | 4.8E-03 | 4.7  | cyclin dependent kinase inhibitor 2A             |
| hsa-miR-24-3p   | 3.9E-02 | -1.8 | TargetScan Human  | High (predicted)        | CXCR2    | 3.1E-02 | 2.4  | C-X-C motif chemokine receptor 2                 |
| hsa-miR-24-3p   | 3.9E-02 | -1.8 | TargetScan Human  | High (predicted)        | DCANP1   | 4.4E-03 | 11.1 | dendritic cell associated nuclear protein        |
| hsa-miR-24-3p   | 3.9E-02 | -1.8 | TargetScan Human  | High (predicted)        | DNASE1L3 | 3.9E-02 | 4.1  | deoxyribonuclease 1 like 3                       |
| hsa-miR-24-3p   | 3.9E-02 | -1.8 | miRecords         | Experimentally Observed | E2F2     | 2.7E-02 | 4.3  | E2F transcription factor 2                       |
| hsa-miR-24-3p   | 3.9E-02 | -1.8 | TargetScan Human  | High (predicted)        | EDA2R    | 3.6E-02 | 3.4  | ectodysplasin A2 receptor                        |
| hsa-miR-24-3p   | 3.9E-02 | -1.8 | TargetScan Human  | High (predicted)        | FASLG    | 1.5E-05 | 17.7 | Fas ligand                                       |
| hsa-miR-24-3p   | 3.9E-02 | -1.8 | TargetScan Human  | High (predicted)        | IFNG     | 6.9E-03 | 5.9  | interferon gamma                                 |
| hsa-miR-24-3p   | 3.9E-02 | -1.8 | TargetScan Human  | High (predicted)        | PIM2     | 1.2E-03 | 7.4  | Pim-2 proto-oncogene, serine/threonine kinase    |
| hsa-miR-24-3p   | 3.9E-02 | -1.8 | TargetScan Human  | High (predicted)        | SPN      | 2.0E-02 | 2.4  | sialoporphin                                     |
| hsa-miR-24-3p   | 3.9E-02 | -1.8 | TargetScan Human  | High (predicted)        | TPSD1    | 2.3E-02 | 2.1  | tryptase delta 1                                 |
| hsa-miR-24-3p   | 3.9E-02 | -1.8 | TargetScan Human  | High (predicted)        | ZBTB37   | 1.4E-02 | 2.4  | zinc finger and BTB domain containing 37         |
| hsa-miR-26a-5p  | 3.0E-02 | -1.9 | TargetScan Human  | High (predicted)        | DUSP18   | 7.9E-03 | 2.1  | dual specificity phosphatase 18                  |
| hsa-miR-26a-5p  | 3.0E-02 | -1.9 | TargetScan Human  | High (predicted)        | HLA-F    | 1.7E-02 | 2.7  | major histocompatibility complex, class I, F     |

|                 |         |      |                           |                         |               |         |      |                                                       |
|-----------------|---------|------|---------------------------|-------------------------|---------------|---------|------|-------------------------------------------------------|
| hsa-miR-26a-5p  | 3.0E-02 | -1.9 | miRecords                 | Experimentally Observed | TGFBR2        | 4.8E-02 | 3.3  | transforming growth factor beta receptor 2            |
| hsa-miR-26a-5p  | 3.0E-02 | -1.9 | TargetScan Human          | High (predicted)        | ZBTB37        | 1.4E-02 | 2.4  | zinc finger and BTB domain containing 37              |
| hsa-miR-27b-3p  | 6.1E-03 | -4.1 | TargetScan Human          | High (predicted)        | GOLM1         | 1.8E-02 | 2.1  | golgi membrane protein 1                              |
| hsa-miR-27b-3p  | 6.1E-03 | -4.1 | Ingenuity Expert Findings | Experimentally Observed | IGF1          | 1.1E-02 | 2.7  | insulin like growth factor 1                          |
| hsa-miR-27b-3p  | 6.1E-03 | -4.1 | TargetScan Human          | High (predicted)        | KCNA4         | 1.6E-02 | 3.8  | potassium voltage-gated channel subfamily A member 4  |
| hsa-miR-27b-3p  | 6.1E-03 | -4.1 | TargetScan Human          | High (predicted)        | MS4A7         | 3.2E-02 | 2.8  | membrane spanning 4-domains A7                        |
| hsa-miR-27b-3p  | 6.1E-03 | -4.1 | TargetScan Human          | High (predicted)        | NABP1         | 2.5E-02 | 3.6  | nucleic acid binding protein 1                        |
| hsa-miR-27b-3p  | 6.1E-03 | -4.1 | TargetScan Human          | High (predicted)        | RIPOR2        | 3.8E-03 | 4.3  | RHO family interacting cell polarization regulator 2  |
| hsa-miR-27b-3p  | 6.1E-03 | -4.1 | TargetScan Human          | High (predicted)        | STYK1         | 1.6E-05 | 14.7 | serine/threonine/tyrosine kinase 1                    |
| hsa-miR-27b-3p  | 6.1E-03 | -4.1 | TargetScan Human          | High (predicted)        | TMSB10/TMSB4X | 1.3E-02 | 2.0  | thymosin beta 4, X-linked                             |
| hsa-miR-27b-3p  | 6.1E-03 | -4.1 | TargetScan Human          | High (predicted)        | TRAF3IP3      | 9.9E-06 | 30.7 | TRAF3 interacting protein 3                           |
| hsa-miR-27b-3p  | 6.1E-03 | -4.1 | TargetScan Human          | High (predicted)        | YPEL1         | 1.0E-02 | 2.1  | yippee like 1                                         |
| hsa-miR-27b-3p  | 6.1E-03 | -4.1 | TargetScan Human          | High (predicted)        | ZBTB37        | 1.4E-02 | 2.4  | zinc finger and BTB domain containing 37              |
| hsa-miR-302d-3p | 2.7E-02 | -2.4 | TargetScan Human          | High (predicted)        | LAMP5         | 2.8E-02 | 6.3  | lysosomal associated membrane protein family member 5 |
| hsa-miR-302d-3p | 2.7E-02 | -2.4 | TargetScan Human          | High (predicted)        | PDCD1LG2      | 3.3E-02 | 2.7  | programmed cell death 1 ligand 2                      |
| hsa-miR-302d-3p | 2.7E-02 | -2.4 | TargetScan Human          | High (predicted)        | RTN1          | 8.4E-04 | 7.6  | reticulon 1                                           |
| hsa-miR-302d-3p | 2.7E-02 | -2.4 | TarBase,miRecords         | Experimentally Observed | STK4          | 9.1E-04 | 2.5  | serine/threonine kinase 4                             |
| hsa-miR-302d-3p | 2.7E-02 | -2.4 | TargetScan Human          | High (predicted)        | TGFBR2        | 4.8E-02 | 3.3  | transforming growth factor beta receptor 2            |
| hsa-miR-302d-3p | 2.7E-02 | -2.4 | TarBase,miRecords         | Experimentally Observed | ZNF226        | 4.1E-03 | 2.1  | zinc finger protein 226                               |
| hsa-miR-296-5p  | 4.1E-02 | -2.2 | TargetScan Human          | High (predicted)        | BMF           | 6.4E-03 | 3.1  | Bcl2 modifying factor                                 |
| hsa-miR-296-5p  | 4.1E-02 | -2.2 | TargetScan Human          | High (predicted)        | C10orf105     | 1.5E-02 | 4.2  | chromosome 10 open reading frame 105                  |
| hsa-miR-296-5p  | 4.1E-02 | -2.2 | TargetScan Human          | High (predicted)        | CCL28         | 3.5E-03 | 4.5  | C-C motif chemokine ligand 28                         |
| hsa-miR-296-5p  | 4.1E-02 | -2.2 | TargetScan Human          | High (predicted)        | CD300LF       | 5.6E-03 | 4.9  | CD300 molecule like family member f                   |
| hsa-miR-296-5p  | 4.1E-02 | -2.2 | TargetScan Human          | High (predicted)        | CD6           | 9.1E-06 | 40.4 | CD6 molecule                                          |
| hsa-miR-296-5p  | 4.1E-02 | -2.2 | TargetScan Human          | High (predicted)        | CD8A          | 1.6E-05 | 25.0 | CD8a molecule                                         |
| hsa-miR-296-5p  | 4.1E-02 | -2.2 | TargetScan Human          | High (predicted)        | CLDN3         | 4.2E-02 | 2.1  | claudin 3                                             |
| hsa-miR-296-5p  | 4.1E-02 | -2.2 | TargetScan Human          | High (predicted)        | CXCL10        | 1.7E-02 | 12.8 | C-X-C motif chemokine ligand 10                       |
| hsa-miR-296-5p  | 4.1E-02 | -2.2 | TargetScan Human          | High (predicted)        | DERL3         | 1.9E-03 | 3.6  | derlin 3                                              |
| hsa-miR-296-5p  | 4.1E-02 | -2.2 | TargetScan Human          | High (predicted)        | E2F2          | 2.7E-02 | 4.3  | E2F transcription factor 2                            |

|                |         |      |                                                              |                                          |          |         |      |                                                                  |
|----------------|---------|------|--------------------------------------------------------------|------------------------------------------|----------|---------|------|------------------------------------------------------------------|
| hsa-miR-296-5p | 4.1E-02 | -2.2 | TargetScan Human                                             | High (predicted)                         | ESPNL    | 2.9E-02 | 5.8  | espin-like                                                       |
| hsa-miR-296-5p | 4.1E-02 | -2.2 | TargetScan Human                                             | High (predicted)                         | GDF10    | 4.1E-02 | 5.3  | growth differentiation factor 10                                 |
| hsa-miR-296-5p | 4.1E-02 | -2.2 | TargetScan Human                                             | High (predicted)                         | KCNN4    | 3.4E-02 | 3.8  | potassium calcium-activated channel subfamily N member 4         |
| hsa-miR-296-5p | 4.1E-02 | -2.2 | TargetScan Human                                             | High (predicted)                         | KRTCAP3  | 8.4E-03 | 3.8  | keratinocyte associated protein 3                                |
| hsa-miR-296-5p | 4.1E-02 | -2.2 | TargetScan Human                                             | High (predicted)                         | MARVELD1 | 1.1E-02 | 2.2  | MARVEL domain containing 1                                       |
| hsa-miR-296-5p | 4.1E-02 | -2.2 | TargetScan Human                                             | High (predicted)                         | NFAM1    | 2.6E-02 | 4.3  | NFAT activating protein with ITAM motif 1                        |
| hsa-miR-296-5p | 4.1E-02 | -2.2 | TargetScan Human                                             | High (predicted)                         | NUAK2    | 4.8E-02 | 2.1  | NUAK family kinase 2                                             |
| hsa-miR-296-5p | 4.1E-02 | -2.2 | TargetScan Human                                             | High (predicted)                         | RAB37    | 1.2E-04 | 4.5  | RAB37, member RAS oncogene family                                |
| hsa-miR-296-5p | 4.1E-02 | -2.2 | TargetScan Human                                             | High (predicted)                         | SNX20    | 1.5E-03 | 4.3  | sorting nexin 20                                                 |
| hsa-miR-296-5p | 4.1E-02 | -2.2 | TargetScan Human                                             | High (predicted)                         | TBC1D10C | 2.0E-06 | 30.3 | TBC1 domain family member 10C                                    |
| hsa-miR-296-5p | 4.1E-02 | -2.2 | TargetScan Human                                             | High (predicted)                         | TNFSF13  | 2.9E-02 | 2.2  | TNF superfamily member 13                                        |
| hsa-miR-296-5p | 4.1E-02 | -2.2 | TargetScan Human                                             | High (predicted)                         | TRPM2    | 2.3E-03 | 3.8  | transient receptor potential cation channel subfamily M member 2 |
| hsa-miR-29c-3p | 1.1E-02 | -3.1 | TargetScan Human                                             | High (predicted)                         | ARRDC3   | 1.1E-02 | 3.0  | arrestin domain containing 3                                     |
| hsa-miR-29c-3p | 1.1E-02 | -3.1 | TargetScan Human                                             | High (predicted)                         | BMF      | 6.4E-03 | 3.1  | Bcl2 modifying factor                                            |
| hsa-miR-29c-3p | 1.1E-02 | -3.1 | TargetScan Human                                             | High (predicted)                         | CASP8    | 3.3E-04 | 6.2  | caspase 8                                                        |
| hsa-miR-29c-3p | 1.1E-02 | -3.1 | TargetScan Human                                             | High (predicted)                         | CCSAP    | 1.4E-02 | 2.5  | centriole, cilia and spindle associated protein                  |
| hsa-miR-29c-3p | 1.1E-02 | -3.1 | Ingenuity Expert Findings,TarBase,TargetScan Human,miRecords | Experimentally Observed,High (predicted) | COL1A2   | 2.3E-02 | 2.9  | collagen type I alpha 2 chain                                    |
| hsa-miR-29c-3p | 1.1E-02 | -3.1 | TarBase,TargetScan Human,miRecords                           | Experimentally Observed,High (predicted) | COL3A1   | 9.4E-03 | 3.5  | collagen type III alpha 1 chain                                  |
| hsa-miR-29c-3p | 1.1E-02 | -3.1 | TargetScan Human                                             | High (predicted)                         | COL4A4   | 3.9E-02 | 2.4  | collagen type IV alpha 4 chain                                   |
| hsa-miR-29c-3p | 1.1E-02 | -3.1 | TargetScan Human                                             | High (predicted)                         | COL5A1   | 2.1E-02 | 2.2  | collagen type V alpha 1 chain                                    |
| hsa-miR-29c-3p | 1.1E-02 | -3.1 | Ingenuity Expert Findings,TargetScan Human                   | Experimentally Observed,High (predicted) | COL5A2   | 1.1E-02 | 2.4  | collagen type V alpha 2 chain                                    |
| hsa-miR-29c-3p | 1.1E-02 | -3.1 | TargetScan Human                                             | High (predicted)                         | ICOS     | 6.7E-03 | 5.0  | inducible T-cell costimulator                                    |
| hsa-miR-29c-3p | 1.1E-02 | -3.1 | TargetScan Human                                             | High (predicted)                         | N4BP2L1  | 3.7E-02 | 2.1  | NEDD4 binding protein 2 like 1                                   |
| hsa-miR-29c-3p | 1.1E-02 | -3.1 | TargetScan Human                                             | High (predicted)                         | NAP1L3   | 2.9E-02 | 8.7  | nucleosome assembly protein 1 like 3                             |
| hsa-miR-29c-3p | 1.1E-02 | -3.1 | TargetScan Human                                             | High (predicted)                         | NAV1     | 3.1E-02 | 2.3  | neuron navigator 1                                               |
| hsa-miR-29c-3p | 1.1E-02 | -3.1 | TargetScan Human                                             | High (predicted)                         | NPAS3    | 1.2E-02 | 2.3  | neuronal PAS domain protein 3                                    |

|                |         |      |                                                      |                                          |         |         |      |                                                        |
|----------------|---------|------|------------------------------------------------------|------------------------------------------|---------|---------|------|--------------------------------------------------------|
| hsa-miR-29c-3p | 1.1E-02 | -3.1 | Ingenuity Expert Findings,TargetScan Human,miRecords | Experimentally Observed                  | PIK3R1  | 4.1E-02 | 2.7  | phosphoinositide-3-kinase regulatory subunit 1         |
| hsa-miR-29c-3p | 1.1E-02 | -3.1 | TargetScan Human                                     | High (predicted)                         | RAB30   | 4.3E-03 | 2.0  | RAB30, member RAS oncogene family                      |
| hsa-miR-29c-3p | 1.1E-02 | -3.1 | TargetScan Human                                     | High (predicted)                         | RGS1    | 6.3E-04 | 19.4 | regulator of G protein signaling 1                     |
| hsa-miR-29c-3p | 1.1E-02 | -3.1 | TargetScan Human                                     | High (predicted)                         | TMEM236 | 1.4E-02 | 4.0  | transmembrane protein 236                              |
| hsa-miR-29c-3p | 1.1E-02 | -3.1 | Ingenuity Expert Findings,TargetScan Human           | Experimentally Observed,High (predicted) | TNFAIP3 | 8.7E-03 | 4.5  | TNF alpha induced protein 3                            |
| hsa-miR-29c-3p | 1.1E-02 | -3.1 | TargetScan Human                                     | High (predicted)                         | TNFRSF9 | 6.8E-03 | 2.3  | TNF receptor superfamily member 9                      |
| hsa-miR-29c-3p | 1.1E-02 | -3.1 | TargetScan Human                                     | High (predicted)                         | ZBTB37  | 1.4E-02 | 2.4  | zinc finger and BTB domain containing 37               |
| hsa-miR-30c-5p | 4.3E-02 | -1.9 | TarBase                                              | Experimentally Observed                  | ANPEP   | 7.3E-03 | 4.5  | alanyl aminopeptidase, membrane                        |
| hsa-miR-30c-5p | 4.3E-02 | -1.9 | TargetScan Human                                     | High (predicted)                         | CCL19   | 1.8E-02 | 16.1 | C-C motif chemokine ligand 19                          |
| hsa-miR-30c-5p | 4.3E-02 | -1.9 | TargetScan Human                                     | High (predicted)                         | CFHR3   | 4.0E-02 | 3.0  | complement factor H related 3                          |
| hsa-miR-30c-5p | 4.3E-02 | -1.9 | TargetScan Human                                     | High (predicted)                         | FAM133A | 4.8E-03 | 4.8  | family with sequence similarity 133 member A           |
| hsa-miR-30c-5p | 4.3E-02 | -1.9 | TargetScan Human                                     | High (predicted)                         | FAM49A  | 5.5E-03 | 2.1  | family with sequence similarity 49 member A            |
| hsa-miR-30c-5p | 4.3E-02 | -1.9 | TargetScan Human                                     | High (predicted)                         | GCSAM   | 8.1E-03 | 4.0  | germinal center associated signaling and motility      |
| hsa-miR-30c-5p | 4.3E-02 | -1.9 | TargetScan Human                                     | High (predicted)                         | LRRC17  | 4.0E-04 | 5.4  | leucine rich repeat containing 17                      |
| hsa-miR-30c-5p | 4.3E-02 | -1.9 | TargetScan Human                                     | High (predicted)                         | PGBD2   | 1.3E-02 | 2.1  | piggyBac transposable element derived 2                |
| hsa-miR-30c-5p | 4.3E-02 | -1.9 | TargetScan Human                                     | High (predicted)                         | PIP4K2A | 2.0E-02 | 2.8  | phosphatidylinositol-5-phosphate 4-kinase type 2 alpha |
| hsa-miR-30c-5p | 4.3E-02 | -1.9 | TargetScan Human                                     | High (predicted)                         | PRDM1   | 6.8E-05 | 26.8 | PR/SET domain 1                                        |
| hsa-miR-30c-5p | 4.3E-02 | -1.9 | TarBase,TargetScan Human                             | Experimentally Observed,High (predicted) | RAB27B  | 4.6E-03 | 3.0  | RAB27B, member RAS oncogene family                     |
| hsa-miR-30c-5p | 4.3E-02 | -1.9 | TargetScan Human                                     | High (predicted)                         | RAB38   | 2.5E-02 | 3.1  | RAB38, member RAS oncogene family                      |
| hsa-miR-30c-5p | 4.3E-02 | -1.9 | TargetScan Human                                     | High (predicted)                         | RHEBL1  | 9.1E-03 | 2.4  | Ras homolog enriched in brain like 1                   |
| hsa-miR-30c-5p | 4.3E-02 | -1.9 | Ingenuity Expert Findings,TargetScan Human           | Experimentally Observed,High (predicted) | RUNX2   | 4.4E-04 | 6.0  | runt related transcription factor 2                    |
| hsa-miR-30c-5p | 4.3E-02 | -1.9 | TargetScan Human                                     | High (predicted)                         | SCN9A   | 2.2E-02 | 2.7  | sodium voltage-gated channel alpha subunit 9           |
| hsa-miR-30c-5p | 4.3E-02 | -1.9 | TargetScan Human                                     | High (predicted)                         | SOCS1   | 2.0E-03 | 3.9  | suppressor of cytokine signaling 1                     |

|                |         |      |                  |                  |                          |         |      |                                                                              |
|----------------|---------|------|------------------|------------------|--------------------------|---------|------|------------------------------------------------------------------------------|
| hsa-miR-30c-5p | 4.3E-02 | -1.9 | TargetScan Human | High (predicted) | STIM2                    | 3.6E-02 | 2.0  | stromal interaction molecule 2                                               |
| hsa-miR-30c-5p | 4.3E-02 | -1.9 | TargetScan Human | High (predicted) | TNFSF13B                 | 5.5E-03 | 5.4  | TNF superfamily member 13b                                                   |
| hsa-miR-324-5p | 2.0E-02 | -2.9 | TargetScan Human | High (predicted) | C10orf105                | 1.5E-02 | 4.2  | chromosome 10 open reading frame 105                                         |
| hsa-miR-324-5p | 2.0E-02 | -2.9 | TargetScan Human | High (predicted) | CD84                     | 1.1E-04 | 11.1 | CD84 molecule                                                                |
| hsa-miR-324-5p | 2.0E-02 | -2.9 | TargetScan Human | High (predicted) | CRTAM                    | 3.2E-05 | 27.8 | cytotoxic and regulatory T-cell molecule                                     |
| hsa-miR-324-5p | 2.0E-02 | -2.9 | TargetScan Human | High (predicted) | CTLA4                    | 3.8E-03 | 10.7 | cytotoxic T-lymphocyte associated protein 4                                  |
| hsa-miR-324-5p | 2.0E-02 | -2.9 | TargetScan Human | High (predicted) | FAM19A2                  | 2.9E-02 | 2.2  | family with sequence similarity 19 member A2, C-C motif chemokine like       |
| hsa-miR-324-5p | 2.0E-02 | -2.9 | TargetScan Human | High (predicted) | KIAA0513                 | 1.3E-02 | 2.0  | KIAA0513                                                                     |
| hsa-miR-324-5p | 2.0E-02 | -2.9 | TargetScan Human | High (predicted) | P2RY13                   | 3.4E-02 | 3.6  | purinergic receptor P2Y13                                                    |
| hsa-miR-324-5p | 2.0E-02 | -2.9 | TargetScan Human | High (predicted) | RAB27B                   | 4.6E-03 | 3.0  | RAB27B, member RAS oncogene family                                           |
| hsa-miR-324-5p | 2.0E-02 | -2.9 | TargetScan Human | High (predicted) | REEP4                    | 1.1E-02 | 2.2  | receptor accessory protein 4                                                 |
| hsa-miR-324-5p | 2.0E-02 | -2.9 | TargetScan Human | High (predicted) | S1PR4                    | 1.8E-04 | 7.1  | sphingosine-1-phosphate receptor 4                                           |
| hsa-miR-324-5p | 2.0E-02 | -2.9 | TargetScan Human | High (predicted) | THEMIS2                  | 1.5E-02 | 4.0  | thymocyte selection associated family member 2                               |
| hsa-miR-328-3p | 3.0E-02 | -2.1 | TargetScan Human | High (predicted) | APBB1IP                  | 5.8E-04 | 6.2  | amyloid beta precursor protein binding family B member 1 interacting protein |
| hsa-miR-328-3p | 3.0E-02 | -2.1 | TargetScan Human | High (predicted) | C16orf89                 | 1.1E-02 | 5.4  | chromosome 16 open reading frame 89                                          |
| hsa-miR-328-3p | 3.0E-02 | -2.1 | TargetScan Human | High (predicted) | FRAT1                    | 4.4E-02 | 2.2  | FRAT1, WNT signaling pathway regulator                                       |
| hsa-miR-328-3p | 3.0E-02 | -2.1 | TargetScan Human | High (predicted) | HKDC1                    | 5.3E-03 | 3.3  | hexokinase domain containing 1                                               |
| hsa-miR-328-3p | 3.0E-02 | -2.1 | TargetScan Human | High (predicted) | KY                       | 4.6E-02 | 3.3  | kyphoscoliosis peptidase                                                     |
| hsa-miR-328-3p | 3.0E-02 | -2.1 | TargetScan Human | High (predicted) | LOC100996763/NOTCH2NL    | 1.8E-02 | 2.7  | notch 2 N-terminal like                                                      |
| hsa-miR-328-3p | 3.0E-02 | -2.1 | TargetScan Human | High (predicted) | PRF1                     | 1.5E-04 | 6.1  | perforin 1                                                                   |
| hsa-miR-328-3p | 3.0E-02 | -2.1 | TargetScan Human | High (predicted) | PSTPIP2                  | 8.7E-03 | 4.5  | proline-serine-threonine phosphatase interacting protein 2                   |
| hsa-miR-328-3p | 3.0E-02 | -2.1 | TargetScan Human | High (predicted) | RASL11B                  | 9.4E-03 | 6.0  | RAS like family 11 member B                                                  |
| hsa-miR-33a-3p | 1.9E-02 | -2.2 | TargetScan Human | High (predicted) | ENKUR                    | 4.9E-02 | 2.6  | enkurin, TRPC channel interacting protein                                    |
| hsa-miR-335-5p | 2.1E-02 | -2.2 | TargetScan Human | High (predicted) | ADAMDEC1                 | 4.9E-02 | 2.7  | ADAM like decysin 1                                                          |
| hsa-miR-335-5p | 2.1E-02 | -2.2 | TargetScan Human | High (predicted) | ALOX5AP                  | 3.0E-02 | 4.6  | arachidonate 5-lipoxygenase activating protein                               |
| hsa-miR-335-5p | 2.1E-02 | -2.2 | TargetScan Human | High (predicted) | NBPF10 (includes others) | 9.4E-04 | 2.2  | NBPF member 20                                                               |
| hsa-miR-335-5p | 2.1E-02 | -2.2 | TargetScan Human | High (predicted) | PTPN22                   | 7.4E-05 | 16.7 | protein tyrosine phosphatase, non-receptor type 22                           |

|                 |         |      |                  |                  |          |         |      |                                                                        |
|-----------------|---------|------|------------------|------------------|----------|---------|------|------------------------------------------------------------------------|
| hsa-miR-335-5p  | 2.1E-02 | -2.2 | TargetScan Human | High (predicted) | UCMA     | 2.0E-02 | 4.2  | upper zone of growth plate and cartilage matrix associated             |
| hsa-miR-345-5p  | 1.4E-02 | -2.1 | TargetScan Human | High (predicted) | MAP3K7CL | 3.5E-02 | 4.8  | MAP3K7 C-terminal like                                                 |
| hsa-miR-345-5p  | 1.4E-02 | -2.1 | TargetScan Human | High (predicted) | RGS1     | 6.3E-04 | 19.4 | regulator of G protein signaling 1                                     |
| hsa-miR-345-5p  | 1.4E-02 | -2.1 | TargetScan Human | High (predicted) | SAPCD1   | 1.5E-02 | 2.6  | suppressor APC domain containing 1                                     |
| hsa-miR-345-5p  | 1.4E-02 | -2.1 | TargetScan Human | High (predicted) | TGM1     | 1.8E-02 | 2.8  | transglutaminase 1                                                     |
| hsa-miR-345-5p  | 1.4E-02 | -2.1 | TargetScan Human | High (predicted) | UBE2L6   | 4.9E-02 | 2.1  | ubiquitin conjugating enzyme E2 L6                                     |
| hsa-miR-361-5p  | 3.1E-02 | -2.9 | TargetScan Human | High (predicted) | ERI2     | 3.6E-02 | 2.1  | ERI1 exoribonuclease family member 2                                   |
| hsa-miR-361-5p  | 3.1E-02 | -2.9 | TargetScan Human | High (predicted) | OGN      | 1.2E-02 | 7.0  | osteoglycin                                                            |
| hsa-miR-361-5p  | 3.1E-02 | -2.9 | TargetScan Human | High (predicted) | RAB27B   | 4.6E-03 | 3.0  | RAB27B, member RAS oncogene family                                     |
| hsa-miR-361-5p  | 3.1E-02 | -2.9 | TargetScan Human | High (predicted) | RAB30    | 4.3E-03 | 2.0  | RAB30, member RAS oncogene family                                      |
| hsa-miR-361-5p  | 3.1E-02 | -2.9 | TargetScan Human | High (predicted) | RMI2     | 2.3E-02 | 3.6  | RecQ mediated genome instability 2                                     |
| hsa-miR-365a-3p | 2.1E-03 | -2.7 | TargetScan Human | High (predicted) | ARRDC3   | 1.1E-02 | 3.0  | arrestin domain containing 3                                           |
| hsa-miR-365a-3p | 2.1E-03 | -2.7 | TargetScan Human | High (predicted) | DOK2     | 1.4E-02 | 5.4  | docking protein 2                                                      |
| hsa-miR-365a-3p | 2.1E-03 | -2.7 | TargetScan Human | High (predicted) | E2F2     | 2.7E-02 | 4.3  | E2F transcription factor 2                                             |
| hsa-miR-365a-3p | 2.1E-03 | -2.7 | TargetScan Human | High (predicted) | HELLS    | 2.3E-02 | 3.3  | helicase, lymphoid-specific                                            |
| hsa-miR-365a-3p | 2.1E-03 | -2.7 | TargetScan Human | High (predicted) | ITGAD    | 3.9E-03 | 13.9 | integrin subunit alpha D                                               |
| hsa-miR-365a-3p | 2.1E-03 | -2.7 | TargetScan Human | High (predicted) | MCOLN2   | 7.1E-06 | 24.1 | mucolipin 2                                                            |
| hsa-miR-365a-3p | 2.1E-03 | -2.7 | TargetScan Human | High (predicted) | NABP1    | 2.5E-02 | 3.6  | nucleic acid binding protein 1                                         |
| hsa-miR-365a-3p | 2.1E-03 | -2.7 | TargetScan Human | High (predicted) | RHEBL1   | 9.1E-03 | 2.4  | Ras homolog enriched in brain like 1                                   |
| hsa-miR-376a-3p | 2.6E-03 | -2.6 | TargetScan Human | High (predicted) | CASP8    | 3.3E-04 | 6.2  | caspase 8                                                              |
| hsa-miR-376a-3p | 2.6E-03 | -2.6 | TargetScan Human | High (predicted) | CATSPER2 | 4.0E-02 | 2.1  | cation channel sperm associated 2                                      |
| hsa-miR-376a-3p | 2.6E-03 | -2.6 | TargetScan Human | High (predicted) | GIMAP2   | 3.2E-02 | 2.8  | GTPase, IMAP family member 2                                           |
| hsa-miR-376a-3p | 2.6E-03 | -2.6 | TargetScan Human | High (predicted) | IL7      | 2.2E-03 | 6.2  | interleukin 7                                                          |
| hsa-miR-376a-3p | 2.6E-03 | -2.6 | TargetScan Human | High (predicted) | LILRA2   | 3.9E-02 | 3.1  | leukocyte immunoglobulin like receptor A2                              |
| hsa-miR-376a-3p | 2.6E-03 | -2.6 | TargetScan Human | High (predicted) | RGS1     | 6.3E-04 | 19.4 | regulator of G protein signaling 1                                     |
| hsa-miR-376c-3p | 2.0E-02 | -2.0 | TargetScan Human | High (predicted) | PARP4    | 2.1E-02 | 2.0  | poly(ADP-ribose) polymerase family member 4                            |
| hsa-miR-376c-3p | 2.0E-02 | -2.0 | TargetScan Human | High (predicted) | THEMIS   | 6.9E-06 | 32.9 | thymocyte selection associated                                         |
| hsa-miR-376c-3p | 2.0E-02 | -2.0 | TargetScan Human | High (predicted) | TMEM154  | 3.1E-02 | 2.2  | transmembrane protein 154                                              |
| hsa-miR-422a    | 9.6E-03 | -2.6 | TargetScan Human | High (predicted) | ARHGAP15 | 6.5E-03 | 2.6  | Rho GTPase activating protein 15                                       |
| hsa-miR-422a    | 9.6E-03 | -2.6 | TargetScan Human | High (predicted) | CCR7     | 1.8E-03 | 14.7 | C-C motif chemokine receptor 7                                         |
| hsa-miR-422a    | 9.6E-03 | -2.6 | TargetScan Human | High (predicted) | CD226    | 1.5E-03 | 6.5  | CD226 molecule                                                         |
| hsa-miR-422a    | 9.6E-03 | -2.6 | TargetScan Human | High (predicted) | DHX58    | 1.9E-02 | 2.2  | DEXH-box helicase 58                                                   |
| hsa-miR-422a    | 9.6E-03 | -2.6 | TargetScan Human | High (predicted) | NUAK2    | 4.8E-02 | 2.1  | NUAK family kinase 2                                                   |
| hsa-miR-422a    | 9.6E-03 | -2.6 | TargetScan Human | High (predicted) | PIK3CG   | 1.1E-03 | 5.4  | phosphatidylinositol-4,5-bisphosphate 3-kinase catalytic subunit gamma |

|                 |         |      |                  |                  |           |         |      |                                                                                         |
|-----------------|---------|------|------------------|------------------|-----------|---------|------|-----------------------------------------------------------------------------------------|
| hsa-miR-378a-5p | 2.8E-03 | -3.1 | TargetScan Human | High (predicted) | CCNG2     | 3.8E-02 | 2.9  | cyclin G2                                                                               |
| hsa-miR-378a-5p | 2.8E-03 | -3.1 | TargetScan Human | High (predicted) | CD33      | 2.4E-02 | 3.8  | CD33 molecule                                                                           |
| hsa-miR-378a-5p | 2.8E-03 | -3.1 | TargetScan Human | High (predicted) | FRZB      | 1.6E-03 | 5.9  | frizzled-related protein                                                                |
| hsa-miR-378a-5p | 2.8E-03 | -3.1 | TargetScan Human | High (predicted) | LDLRAD2   | 7.0E-03 | 6.6  | low density lipoprotein receptor class A domain containing 2                            |
| hsa-miR-379-5p  | 1.3E-02 | -2.4 | TargetScan Human | High (predicted) | CXCL11    | 2.1E-02 | 14.7 | C-X-C motif chemokine ligand 11                                                         |
| hsa-miR-379-5p  | 1.3E-02 | -2.4 | TargetScan Human | High (predicted) | HLA-E     | 1.6E-02 | 2.1  | major histocompatibility complex, class I, E                                            |
| hsa-miR-379-5p  | 1.3E-02 | -2.4 | TargetScan Human | High (predicted) | ICOS      | 6.7E-03 | 5.0  | inducible T-cell costimulator                                                           |
| hsa-miR-379-5p  | 1.3E-02 | -2.4 | TargetScan Human | High (predicted) | IL18RAP   | 1.3E-02 | 6.0  | interleukin 18 receptor accessory protein                                               |
| hsa-miR-379-5p  | 1.3E-02 | -2.4 | TargetScan Human | High (predicted) | LINC01588 | 8.1E-04 | 7.0  | long intergenic non-protein coding RNA 1588                                             |
| hsa-miR-379-5p  | 1.3E-02 | -2.4 | TargetScan Human | High (predicted) | OGN       | 1.2E-02 | 7.0  | osteoglycin                                                                             |
| hsa-miR-379-5p  | 1.3E-02 | -2.4 | TargetScan Human | High (predicted) | RAB30     | 4.3E-03 | 2.0  | RAB30, member RAS oncogene family                                                       |
| hsa-miR-379-5p  | 1.3E-02 | -2.4 | TargetScan Human | High (predicted) | SIT1      | 1.6E-04 | 13.2 | signaling threshold regulating transmembrane adaptor 1                                  |
| hsa-miR-379-5p  | 1.3E-02 | -2.4 | TargetScan Human | High (predicted) | SPEF2     | 3.4E-03 | 5.0  | sperm flagellar 2                                                                       |
| hsa-miR-409-3p  | 4.2E-02 | -1.8 | TargetScan Human | High (predicted) | CCL28     | 3.5E-03 | 4.5  | C-C motif chemokine ligand 28                                                           |
| hsa-miR-409-3p  | 4.2E-02 | -1.8 | TargetScan Human | High (predicted) | TNFSF14   | 6.0E-03 | 8.9  | TNF superfamily member 14                                                               |
| hsa-miR-411-5p  | 1.5E-02 | -2.2 | TargetScan Human | High (predicted) | METTL7A   | 2.3E-02 | 2.9  | methyltransferase like 7A                                                               |
| hsa-miR-423-5p  | 2.2E-02 | -2.2 | TargetScan Human | High (predicted) | ANPEP     | 7.3E-03 | 4.5  | alanyl aminopeptidase, membrane                                                         |
| hsa-miR-423-5p  | 2.2E-02 | -2.2 | TargetScan Human | High (predicted) | ARHGAP4   | 8.1E-03 | 2.7  | Rho GTPase activating protein 4                                                         |
| hsa-miR-423-5p  | 2.2E-02 | -2.2 | TargetScan Human | High (predicted) | BMF       | 6.4E-03 | 3.1  | Bcl2 modifying factor                                                                   |
| hsa-miR-423-5p  | 2.2E-02 | -2.2 | TargetScan Human | High (predicted) | C10orf105 | 1.5E-02 | 4.2  | chromosome 10 open reading frame 105                                                    |
| hsa-miR-423-5p  | 2.2E-02 | -2.2 | TargetScan Human | High (predicted) | CD72      | 7.2E-03 | 7.3  | CD72 molecule                                                                           |
| hsa-miR-423-5p  | 2.2E-02 | -2.2 | TargetScan Human | High (predicted) | CD8A      | 1.6E-05 | 25.0 | CD8a molecule                                                                           |
| hsa-miR-423-5p  | 2.2E-02 | -2.2 | TargetScan Human | High (predicted) | CXCL16    | 3.6E-02 | 3.0  | C-X-C motif chemokine ligand 16                                                         |
| hsa-miR-423-5p  | 2.2E-02 | -2.2 | TargetScan Human | High (predicted) | KLHDC7B   | 5.5E-03 | 8.2  | kelch domain containing 7B                                                              |
| hsa-miR-423-5p  | 2.2E-02 | -2.2 | TargetScan Human | High (predicted) | METTL27   | 4.6E-02 | 5.7  | methyltransferase like 27                                                               |
| hsa-miR-423-5p  | 2.2E-02 | -2.2 | TargetScan Human | High (predicted) | MYCL      | 1.1E-02 | 6.2  | MYCL proto-oncogene, bHLH transcription factor                                          |
| hsa-miR-423-5p  | 2.2E-02 | -2.2 | TargetScan Human | High (predicted) | NFAM1     | 2.6E-02 | 4.3  | NFAT activating protein with ITAM motif 1                                               |
| hsa-miR-423-5p  | 2.2E-02 | -2.2 | TargetScan Human | High (predicted) | NKG7      | 6.1E-06 | 12.4 | natural killer cell granule protein 7                                                   |
| hsa-miR-423-5p  | 2.2E-02 | -2.2 | TargetScan Human | High (predicted) | PTK2B     | 3.1E-03 | 3.4  | protein tyrosine kinase 2 beta                                                          |
| hsa-miR-423-5p  | 2.2E-02 | -2.2 | TargetScan Human | High (predicted) | RAC2      | 1.0E-03 | 4.1  | ras-related C3 botulinum toxin substrate 2 (rho family, small GTP binding protein Rac2) |
| hsa-miR-423-5p  | 2.2E-02 | -2.2 | TargetScan Human | High (predicted) | RGS1      | 6.3E-04 | 19.4 | regulator of G protein signaling 1                                                      |

|                |         |      |                  |                  |                             |         |      |                                                       |
|----------------|---------|------|------------------|------------------|-----------------------------|---------|------|-------------------------------------------------------|
| hsa-miR-423-5p | 2.2E-02 | -2.2 | TargetScan Human | High (predicted) | RIMBP3<br>(includes others) | 1.3E-03 | 5.7  | RIMS binding protein 3                                |
| hsa-miR-423-5p | 2.2E-02 | -2.2 | TargetScan Human | High (predicted) | SELL                        | 6.5E-03 | 8.1  | selectin L                                            |
| hsa-miR-423-5p | 2.2E-02 | -2.2 | TargetScan Human | High (predicted) | SRCIN1                      | 3.4E-03 | 5.0  | SRC kinase signaling inhibitor 1                      |
| hsa-miR-423-5p | 2.2E-02 | -2.2 | TargetScan Human | High (predicted) | THBS3                       | 4.8E-02 | 2.2  | thrombospondin 3                                      |
| hsa-miR-423-5p | 2.2E-02 | -2.2 | TargetScan Human | High (predicted) | THY1                        | 2.8E-02 | 6.8  | Thy-1 cell surface antigen                            |
| hsa-miR-423-5p | 2.2E-02 | -2.2 | TargetScan Human | High (predicted) | TIFAB                       | 1.2E-03 | 16.9 | TIFA inhibitor                                        |
| hsa-miR-423-5p | 2.2E-02 | -2.2 | TargetScan Human | High (predicted) | TMED8                       | 1.5E-02 | 2.3  | transmembrane p24 trafficking protein family member 8 |
| hsa-miR-423-5p | 2.2E-02 | -2.2 | TargetScan Human | High (predicted) | TRABD2A                     | 2.6E-03 | 2.8  | TraB domain containing 2A                             |
| hsa-miR-423-5p | 2.2E-02 | -2.2 | TargetScan Human | High (predicted) | TRIM11                      | 5.4E-03 | 2.3  | tripartite motif containing 11                        |
| hsa-miR-451a   | 1.7E-02 | -3.7 | TargetScan Human | High (predicted) | BATF                        | 1.0E-03 | 13.3 | basic leucine zipper ATF-like transcription factor    |
| hsa-miR-451a   | 1.7E-02 | -3.7 | TargetScan Human | High (predicted) | CXCL16                      | 3.6E-02 | 3.0  | C-X-C motif chemokine ligand 16                       |
| hsa-miR-451a   | 1.7E-02 | -3.7 | TargetScan Human | High (predicted) | CXorf21                     | 4.5E-03 | 5.0  | chromosome X open reading frame 21                    |
| hsa-miR-451a   | 1.7E-02 | -3.7 | TargetScan Human | High (predicted) | HELLS                       | 2.3E-02 | 3.3  | helicase, lymphoid-specific                           |
| hsa-miR-455-3p | 1.5E-02 | -3.3 | TargetScan Human | High (predicted) | FAM105A                     | 2.1E-03 | 5.5  | family with sequence similarity 105 member A          |
| hsa-miR-455-3p | 1.5E-02 | -3.3 | TargetScan Human | High (predicted) | PITX1                       | 4.7E-02 | 3.5  | paired like homeodomain 1                             |
| hsa-miR-455-3p | 1.5E-02 | -3.3 | TargetScan Human | High (predicted) | RGS10                       | 1.8E-02 | 3.4  | regulator of G protein signaling 10                   |
| hsa-miR-455-3p | 1.5E-02 | -3.3 | TargetScan Human | High (predicted) | STK17B                      | 3.0E-02 | 3.0  | serine/threonine kinase 17b                           |
| hsa-miR-455-3p | 1.5E-02 | -3.3 | TargetScan Human | High (predicted) | UBE2L6                      | 4.9E-02 | 2.1  | ubiquitin conjugating enzyme E2 L6                    |
| hsa-miR-455-3p | 1.5E-02 | -3.3 | TargetScan Human | High (predicted) | XCL1                        | 4.4E-04 | 20.0 | X-C motif chemokine ligand 1                          |
| hsa-miR-455-5p | 1.2E-02 | -3.0 | TargetScan Human | High (predicted) | CCSAP                       | 1.4E-02 | 2.5  | centriole, cilia and spindle associated protein       |
| hsa-miR-455-5p | 1.2E-02 | -3.0 | TargetScan Human | High (predicted) | CD200R1                     | 2.0E-02 | 2.6  | CD200 receptor 1                                      |
| hsa-miR-455-5p | 1.2E-02 | -3.0 | TargetScan Human | High (predicted) | FCAR                        | 1.6E-02 | 3.0  | Fc fragment of IgA receptor                           |
| hsa-miR-455-5p | 1.2E-02 | -3.0 | TargetScan Human | High (predicted) | MS4A7                       | 3.2E-02 | 2.8  | membrane spanning 4-domains A7                        |
| hsa-miR-455-5p | 1.2E-02 | -3.0 | TargetScan Human | High (predicted) | NCK2                        | 3.5E-03 | 3.0  | NCK adaptor protein 2                                 |
| hsa-miR-455-5p | 1.2E-02 | -3.0 | TargetScan Human | High (predicted) | TSPAN5                      | 4.6E-03 | 3.5  | tetraspanin 5                                         |
| hsa-miR-486-5p | 4.6E-02 | -2.0 | TargetScan Human | High (predicted) | CD247                       | 3.2E-05 | 17.9 | CD247 molecule                                        |
| hsa-miR-486-5p | 4.6E-02 | -2.0 | TargetScan Human | High (predicted) | LRRC25                      | 3.8E-02 | 3.3  | leucine rich repeat containing 25                     |
| hsa-miR-486-5p | 4.6E-02 | -2.0 | TargetScan Human | High (predicted) | PTGDR                       | 3.0E-03 | 5.2  | prostaglandin D2 receptor                             |
| hsa-miR-494-3p | 8.2E-03 | -3.5 | TargetScan Human | High (predicted) | ADAM28                      | 5.4E-03 | 4.1  | ADAM metallopeptidase domain 28                       |
| hsa-miR-494-3p | 8.2E-03 | -3.5 | TargetScan Human | High (predicted) | ANXA2R                      | 1.6E-02 | 2.2  | annexin A2 receptor                                   |
| hsa-miR-494-3p | 8.2E-03 | -3.5 | TargetScan Human | High (predicted) | KLRC4                       | 3.3E-06 | 17.8 | killer cell lectin like receptor C4                   |

|                 |         |      |                            |                         |                   |         |      |                                                           |
|-----------------|---------|------|----------------------------|-------------------------|-------------------|---------|------|-----------------------------------------------------------|
| hsa-miR-494-3p  | 8.2E-03 | -3.5 | TargetScan Human           | High (predicted)        | MNDA              | 9.7E-03 | 5.0  | myeloid cell nuclear differentiation antigen              |
| hsa-miR-494-3p  | 8.2E-03 | -3.5 | TargetScan Human           | High (predicted)        | SLAMF1            | 2.9E-02 | 4.9  | signaling lymphocytic activation molecule family member 1 |
| hsa-miR-494-3p  | 8.2E-03 | -3.5 | TargetScan Human           | High (predicted)        | UBE2L6            | 4.9E-02 | 2.1  | ubiquitin conjugating enzyme E2 L6                        |
| hsa-miR-494-3p  | 8.2E-03 | -3.5 | TargetScan Human           | High (predicted)        | ZBTB37            | 1.4E-02 | 2.4  | zinc finger and BTB domain containing 37                  |
| hsa-miR-499a-5p | 6.2E-03 | -3.8 | TargetScan Human           | High (predicted)        | CXCL11            | 2.1E-02 | 14.7 | C-X-C motif chemokine ligand 11                           |
| hsa-miR-499a-5p | 6.2E-03 | -3.8 | TargetScan Human           | High (predicted)        | ENKUR             | 4.9E-02 | 2.6  | enkurin, TRPC channel interacting protein                 |
| hsa-miR-499a-5p | 6.2E-03 | -3.8 | TargetScan Human           | High (predicted)        | SCRG1             | 4.5E-02 | 3.3  | stimulator of chondrogenesis 1                            |
| hsa-miR-499a-5p | 6.2E-03 | -3.8 | TargetScan Human           | High (predicted)        | VAV3              | 6.1E-03 | 2.6  | vav guanine nucleotide exchange factor 3                  |
| hsa-miR-532-5p  | 3.6E-02 | -1.9 | TargetScan Human           | High (predicted)        | MS4A14            | 4.7E-02 | 2.9  | membrane spanning 4-domains A14                           |
| hsa-miR-532-5p  | 3.6E-02 | -1.9 | TargetScan Human           | High (predicted)        | NCF2              | 2.2E-02 | 3.6  | neutrophil cytosolic factor 2                             |
| hsa-miR-532-5p  | 3.6E-02 | -1.9 | TargetScan Human,miRecords | Experimentally Observed | RUNX3             | 1.5E-05 | 16.8 | runt related transcription factor 3                       |
| hsa-miR-532-5p  | 3.6E-02 | -1.9 | TargetScan Human           | High (predicted)        | TFEC              | 4.1E-02 | 4.4  | transcription factor EC                                   |
| hsa-miR-532-5p  | 3.6E-02 | -1.9 | TargetScan Human           | High (predicted)        | TTC14             | 3.3E-04 | 2.2  | tetratricopeptide repeat domain 14                        |
| hsa-miR-532-5p  | 3.6E-02 | -1.9 | TargetScan Human           | High (predicted)        | UTS2B             | 3.0E-02 | 2.5  | urotensin 2B                                              |
| hsa-miR-532-5p  | 3.6E-02 | -1.9 | TargetScan Human           | High (predicted)        | ZBTB37            | 1.4E-02 | 2.4  | zinc finger and BTB domain containing 37                  |
| hsa-miR-642a-5p | 7.8E-03 | -2.5 | TargetScan Human           | High (predicted)        | ARHGAP25          | 4.8E-03 | 2.8  | Rho GTPase activating protein 25                          |
| hsa-miR-642a-5p | 7.8E-03 | -2.5 | TargetScan Human           | High (predicted)        | FIBIN             | 6.4E-03 | 4.8  | fin bud initiation factor homolog (zebrafish)             |
| hsa-miR-642a-5p | 7.8E-03 | -2.5 | TargetScan Human           | High (predicted)        | GCSAM             | 8.1E-03 | 4.0  | germinal center associated signaling and motility         |
| hsa-miR-642a-5p | 7.8E-03 | -2.5 | TargetScan Human           | High (predicted)        | LTB               | 1.4E-02 | 8.6  | lymphotoxin beta                                          |
| hsa-miR-28-5p   | 2.9E-02 | -2.2 | TargetScan Human           | High (predicted)        | CCL28             | 3.5E-03 | 4.5  | C-C motif chemokine ligand 28                             |
| hsa-miR-28-5p   | 2.9E-02 | -2.2 | TargetScan Human           | High (predicted)        | EOMES             | 3.8E-06 | 27.5 | eomesodermin                                              |
| hsa-miR-28-5p   | 2.9E-02 | -2.2 | TargetScan Human           | High (predicted)        | N4BP2L1           | 3.7E-02 | 2.1  | NEDD4 binding protein 2 like 1                            |
| hsa-miR-28-5p   | 2.9E-02 | -2.2 | TargetScan Human           | High (predicted)        | SCRG1             | 4.5E-02 | 3.3  | stimulator of chondrogenesis 1                            |
| hsa-miR-28-5p   | 2.9E-02 | -2.2 | TargetScan Human           | High (predicted)        | SNX20             | 1.5E-03 | 4.3  | sorting nexin 20                                          |
| hsa-miR-744-5p  | 3.1E-02 | -2.1 | TargetScan Human           | High (predicted)        | B3GAT1            | 8.3E-03 | 6.5  | beta-1,3-glucuronyltransferase 1                          |
| hsa-miR-744-5p  | 3.1E-02 | -2.1 | TargetScan Human           | High (predicted)        | BCL11B            | 1.5E-04 | 13.7 | B-cell CLL/lymphoma 11B                                   |
| hsa-miR-744-5p  | 3.1E-02 | -2.1 | TargetScan Human           | High (predicted)        | BLK               | 8.1E-04 | 12.3 | BLK proto-oncogene, Src family tyrosine kinase            |
| hsa-miR-744-5p  | 3.1E-02 | -2.1 | TargetScan Human           | High (predicted)        | CD37              | 3.1E-04 | 9.6  | CD37 molecule                                             |
| hsa-miR-744-5p  | 3.1E-02 | -2.1 | TargetScan Human           | High (predicted)        | CORO7/CORO7-PAM16 | 3.3E-02 | 2.0  | coronin 7                                                 |
| hsa-miR-744-5p  | 3.1E-02 | -2.1 | TargetScan Human           | High (predicted)        | GFRA2             | 2.3E-03 | 3.4  | GDNF family receptor alpha 2                              |
| hsa-miR-744-5p  | 3.1E-02 | -2.1 | TargetScan Human           | High (predicted)        | HAAO              | 1.1E-02 | 3.9  | 3-hydroxyanthranilate 3,4-dioxygenase                     |
| hsa-miR-744-5p  | 3.1E-02 | -2.1 | TargetScan Human           | High (predicted)        | HDAC10            | 5.9E-03 | 2.9  | histone deacetylase 10                                    |

|                |         |      |                                                      |                                          |         |         |      |                                                   |
|----------------|---------|------|------------------------------------------------------|------------------------------------------|---------|---------|------|---------------------------------------------------|
| hsa-miR-744-5p | 3.1E-02 | -2.1 | TargetScan Human                                     | High (predicted)                         | KIF21B  | 1.2E-02 | 2.7  | kinesin family member 21B                         |
| hsa-miR-744-5p | 3.1E-02 | -2.1 | TargetScan Human                                     | High (predicted)                         | MMP25   | 1.6E-03 | 6.1  | matrix metalloproteinase 25                       |
| hsa-miR-744-5p | 3.1E-02 | -2.1 | TargetScan Human                                     | High (predicted)                         | MYO1G   | 5.5E-03 | 7.7  | myosin IG                                         |
| hsa-miR-744-5p | 3.1E-02 | -2.1 | TargetScan Human                                     | High (predicted)                         | OSBPL7  | 3.5E-03 | 2.3  | oxysterol binding protein like 7                  |
| hsa-miR-744-5p | 3.1E-02 | -2.1 | TargetScan Human                                     | High (predicted)                         | PCNX2   | 5.7E-03 | 4.8  | pecanex homolog 2 (Drosophila)                    |
| hsa-miR-744-5p | 3.1E-02 | -2.1 | TargetScan Human                                     | High (predicted)                         | PLD4    | 3.9E-03 | 2.9  | phospholipase D family member 4                   |
| hsa-miR-744-5p | 3.1E-02 | -2.1 | TargetScan Human                                     | High (predicted)                         | SFMBT2  | 3.1E-02 | 2.0  | Scm-like with four mbt domains 2                  |
| hsa-miR-744-5p | 3.1E-02 | -2.1 | TargetScan Human                                     | High (predicted)                         | SRCIN1  | 3.4E-03 | 5.0  | SRC kinase signaling inhibitor 1                  |
| hsa-miR-744-5p | 3.1E-02 | -2.1 | TargetScan Human                                     | High (predicted)                         | TCF7    | 1.7E-02 | 3.0  | transcription factor 7 (T-cell specific, HMG-box) |
| hsa-miR-744-5p | 3.1E-02 | -2.1 | TargetScan Human                                     | High (predicted)                         | THY1    | 2.8E-02 | 6.8  | Thy-1 cell surface antigen                        |
| hsa-miR-9-3p   | 3.9E-03 | -2.5 | TargetScan Human                                     | High (predicted)                         | IL4     | 2.9E-02 | 2.3  | interleukin 4                                     |
| hsa-miR-9-3p   | 3.9E-03 | -2.5 | TargetScan Human                                     | High (predicted)                         | MDK     | 4.1E-02 | 2.4  | midkine (neurite growth-promoting factor 2)       |
| hsa-miR-9-3p   | 3.9E-03 | -2.5 | TargetScan Human                                     | High (predicted)                         | RGS10   | 1.8E-02 | 3.4  | regulator of G protein signaling 10               |
| hsa-miR-9-3p   | 3.9E-03 | -2.5 | TargetScan Human                                     | High (predicted)                         | USP51   | 1.9E-02 | 3.0  | ubiquitin specific peptidase 51                   |
| hsa-miR-9-3p   | 3.9E-03 | -2.5 | TargetScan Human                                     | High (predicted)                         | ZNF214  | 1.2E-02 | 3.1  | zinc finger protein 214                           |
| hsa-miR-9-5p   | 3.5E-03 | -2.9 | TargetScan Human                                     | High (predicted)                         | CLDN14  | 5.3E-03 | 4.0  | claudin 14                                        |
| hsa-miR-9-5p   | 3.5E-03 | -2.9 | TargetScan Human                                     | High (predicted)                         | CXCL11  | 2.1E-02 | 14.7 | C-X-C motif chemokine ligand 11                   |
| hsa-miR-9-5p   | 3.5E-03 | -2.9 | TargetScan Human                                     | High (predicted)                         | EMB     | 4.6E-04 | 6.6  | embigin                                           |
| hsa-miR-9-5p   | 3.5E-03 | -2.9 | TargetScan Human                                     | High (predicted)                         | FOXP2   | 6.3E-03 | 2.4  | forkhead box N2                                   |
| hsa-miR-9-5p   | 3.5E-03 | -2.9 | TargetScan Human                                     | High (predicted)                         | FOXP2   | 1.4E-02 | 3.4  | forkhead box P2                                   |
| hsa-miR-9-5p   | 3.5E-03 | -2.9 | TargetScan Human                                     | High (predicted)                         | GCSAM   | 8.1E-03 | 4.0  | germinal center associated signaling and motility |
| hsa-miR-9-5p   | 3.5E-03 | -2.9 | Ingenuity Expert Findings,TargetScan Human,miRecords | Experimentally Observed,High (predicted) | PRDM1   | 6.8E-05 | 26.8 | PR/SET domain 1                                   |
| hsa-miR-9-5p   | 3.5E-03 | -2.9 | TargetScan Human                                     | High (predicted)                         | RANBP17 | 2.4E-02 | 3.4  | RAN binding protein 17                            |
| hsa-miR-9-5p   | 3.5E-03 | -2.9 | TargetScan Human                                     | High (predicted)                         | VAV3    | 6.1E-03 | 2.6  | vav guanine nucleotide exchange factor 3          |
| hsa-miR-25-3p  | 4.5E-02 | -2.0 | TargetScan Human                                     | High (predicted)                         | ARRDC3  | 1.1E-02 | 3.0  | arrestin domain containing 3                      |
| hsa-miR-25-3p  | 4.5E-02 | -2.0 | TargetScan Human                                     | High (predicted)                         | ASPN    | 5.6E-03 | 5.0  | asporin                                           |
| hsa-miR-25-3p  | 4.5E-02 | -2.0 | Ingenuity Expert Findings,TargetScan Human,miRecords | Experimentally Observed                  | BCL2L11 | 3.3E-02 | 2.4  | BCL2 like 11                                      |
| hsa-miR-25-3p  | 4.5E-02 | -2.0 | TargetScan Human                                     | High (predicted)                         | BTLA    | 2.4E-03 | 8.6  | B and T lymphocyte associated                     |
| hsa-miR-25-3p  | 4.5E-02 | -2.0 | TargetScan Human                                     | High (predicted)                         | CD69    | 1.3E-05 | 20.0 | CD69 molecule                                     |
| hsa-miR-25-3p  | 4.5E-02 | -2.0 | TargetScan Human                                     | High (predicted)                         | FOXP2   | 6.3E-03 | 2.4  | forkhead box N2                                   |

|               |         |      |                           |                         |        |         |      |                                                             |
|---------------|---------|------|---------------------------|-------------------------|--------|---------|------|-------------------------------------------------------------|
| hsa-miR-25-3p | 4.5E-02 | -2.0 | TargetScan Human          | High (predicted)        | IFIT2  | 8.5E-03 | 3.2  | interferon induced protein with tetratricopeptide repeats 2 |
| hsa-miR-25-3p | 4.5E-02 | -2.0 | Ingenuity Expert Findings | Experimentally Observed | IKZF1  | 1.5E-05 | 17.4 | IKAROS family zinc finger 1                                 |
| hsa-miR-25-3p | 4.5E-02 | -2.0 | TargetScan Human          | High (predicted)        | KLRF1  | 1.6E-02 | 2.1  | killer cell lectin like receptor F1                         |
| hsa-miR-25-3p | 4.5E-02 | -2.0 | TargetScan Human          | High (predicted)        | MCOLN2 | 7.1E-06 | 24.1 | mucolipin 2                                                 |
| hsa-miR-25-3p | 4.5E-02 | -2.0 | TargetScan Human          | High (predicted)        | SCRG1  | 4.5E-02 | 3.3  | stimulator of chondrogenesis 1                              |
| hsa-miR-25-3p | 4.5E-02 | -2.0 | TargetScan Human          | High (predicted)        | TAGAP  | 2.7E-04 | 17.9 | T-cell activation RhoGTPase activating protein              |
| hsa-miR-25-3p | 4.5E-02 | -2.0 | TargetScan Human          | High (predicted)        | ZNF287 | 3.5E-02 | 3.3  | zinc finger protein 287                                     |
| hsa-miR-95-3p | 4.0E-02 | -2.1 | TargetScan Human          | High (predicted)        | KMO    | 2.3E-02 | 3.0  | kynurenine 3-monooxygenase                                  |
| hsa-miR-95-3p | 4.0E-02 | -2.1 | TargetScan Human          | High (predicted)        | PLVAP  | 4.0E-02 | 3.6  | plasmalemma vesicle associated protein                      |
