# Supplementary material for: miRNAs may play a major role in the control of gene expression in key pathobiological processes in Chagas disease cardiomyopathy
Source: PubMed Central journal article supplement (PMC7787679; doi:10.1371/journal.pntd.0008889), 2020-12-22
Supplement: pntd.0008889.s010.pdf [file pntd.0008889.s010.pdf]

**S10 table.** DEM-DEG interaction in each pathobiological function or process in CCC myocardium.

| <b>DEM-DEG interaction classification</b> |                     |                         |                   |               |                     |                         |
|-------------------------------------------|---------------------|-------------------------|-------------------|---------------|---------------------|-------------------------|
| <b>Mitochondrial genes</b>                |                     |                         |                   |               |                     |                         |
| <b>DEM ID</b>                             | <b>Expr p-value</b> | <b>Expr Fold Change</b> | <b>Confidence</b> | <b>DEG ID</b> | <b>Expr p-value</b> | <b>Expr Fold Change</b> |
| hsa-miR-101-3p                            | 4.17E-02            | -2.891                  | High (predicted)  | DDIT4         | 6.61E-03            | 4.020                   |
| hsa-miR-103a-3p                           | 2.61E-02            | -2.121                  | High (predicted)  | SH3BP5        | 3.81E-02            | 2.158                   |
|                                           |                     |                         | Experimentally    |               |                     |                         |
| hsa-miR-125b-5p                           | 4.58E-02            | -2.252                  | Observed          | CDKN2A        | 4.77E-03            | 4.656                   |
| hsa-miR-127-3p                            | 4.01E-02            | -1.909                  | High (predicted)  | XRCC3         | 1.55E-02            | 2.016                   |
|                                           |                     |                         | Experimentally    |               |                     |                         |
| hsa-miR-106b-5p                           | 3.04E-02            | -2.348                  | Observed          | BCL2L11       | 3.29E-02            | 2.359                   |
| hsa-miR-193a-5p                           | 4.68E-02            | -1.699                  | High (predicted)  | BCL2L11       | 3.29E-02            | 2.359                   |
| hsa-miR-22-3p                             | 7.27E-03            | -4.686                  | High (predicted)  | DDIT4         | 6.61E-03            | 4.020                   |
|                                           |                     |                         | Experimentally    |               |                     |                         |
| hsa-miR-221-3p                            | 6.50E-03            | -4.286                  | Observed          | BCL2L11       | 3.29E-02            | 2.359                   |
|                                           |                     |                         | Experimentally    |               |                     |                         |
| hsa-miR-221-3p                            | 6.50E-03            | -4.286                  | Observed          | DDIT4         | 6.61E-03            | 4.020                   |
| hsa-miR-24-2-5p                           | 2.27E-02            | -2.073                  | High (predicted)  | PIF1          | 8.20E-03            | 2.975                   |
| hsa-miR-24-3p                             | 3.88E-02            | -1.832                  | High (predicted)  | BCL2L11       | 3.29E-02            | 2.359                   |
|                                           |                     |                         | Experimentally    |               |                     |                         |
| hsa-miR-24-3p                             | 3.88E-02            | -1.832                  | Observed          | CDKN2A        | 4.77E-03            | 4.656                   |
| hsa-miR-29c-3p                            | 1.12E-02            | -3.142                  | High (predicted)  | CASP8         | 3.27E-04            | 6.203                   |
| hsa-miR-376a-3p                           | 2.56E-03            | -2.627                  | High (predicted)  | CASP8         | 3.27E-04            | 6.203                   |
|                                           |                     |                         | Experimentally    |               |                     |                         |
| hsa-miR-25-3p                             | 4.50E-02            | -2.008                  | Observed          | BCL2L11       | 3.29E-02            | 2.359                   |
| <b>Arrythmia</b>                          |                     |                         |                   |               |                     |                         |
| <b>DEM ID</b>                             | <b>Expr p-value</b> | <b>Expr Fold Change</b> | <b>Confidence</b> | <b>DEG ID</b> | <b>Expr p-value</b> | <b>Expr Fold Change</b> |
| hsa-miR-145-5p                            |                     | 6 2.04E-03              | High (predicted)  | KCNA4         | 1.59E-02            | 3.751                   |
| hsa-miR-19b-1-5p                          |                     | 7 1.60E-02              | High (predicted)  | P2RY12        | 1.88E-03            | 5.073                   |
|                                           |                     |                         | Experimentally    |               |                     |                         |
| hsa-miR-212-3p                            |                     | 3 1.92E-02              | Observed          | MMP9          | 3.63E-02            | 7.262                   |
| hsa-miR-27b-3p                            |                     | 11 6.08E-03             | High (predicted)  | KCNA4         | 1.59E-02            | 3.751                   |
| hsa-miR-30c-5p                            |                     | 18 4.34E-02             | High (predicted)  | SCN9A         | 2.16E-02            | 2.735                   |
| hsa-miR-422a                              |                     | 6 9.63E-03              | High (predicted)  | PIK3CG        | 1.09E-03            | 5.372                   |

## Nrf2 induced genes and oxidative stress

| DEM ID          | Expr p-value | Expr Fold Change | Confidence                               | DEG ID   | Expr p-value | Expr Fold Change |
|-----------------|--------------|------------------|------------------------------------------|----------|--------------|------------------|
| hsa-miR-99a-5p  | 1.43E-02     | -2.885           | High (predicted)                         | VNN1     | 3.60E-02     | 4.331            |
| hsa-miR-212-3p  | 1.92E-02     | -2.587           | Experimentally Observed                  | MMP9     | 3.63E-02     | 7.262            |
| hsa-miR-155-5p  | 6.53E-05     | 3.781            | Experimentally Observed                  | MET      | 3.40E-03     | -2.488           |
| hsa-miR-193a-5p | 4.68E-02     | -1.699           | High (predicted)                         | C1orf186 | 5.38E-03     | 5.864            |
| hsa-miR-221-3p  | 6.50E-03     | -4.286           | High (predicted)                         | HNMT     | 1.89E-03     | 2.539            |
| hsa-miR-221-3p  | 6.50E-03     | -4.286           | Experimentally Observed.High (predicted) | PIK3R1   | 4.08E-02     | 2.670            |
| hsa-miR-302d-3p | 2.65E-02     | -2.399           | Experimentally Observed                  | STK4     | 9.12E-04     | 2.480            |
| hsa-miR-296-5p  | 4.12E-02     | -2.217           | High (predicted)                         | TRPM2    | 2.25E-03     | 3.771            |
| hsa-miR-29c-3p  | 1.12E-02     | -3.142           | Experimentally Observed                  | PIK3R1   | 4.08E-02     | 2.670            |
| hsa-miR-532-5p  | 3.58E-02     | -1.943           | High (predicted)                         | NCF2     | 2.16E-02     | 3.550            |

## Fibrosis

| DEM ID          | Expr p-value | Expr Fold Change | Confidence                               | DEG ID | Expr p-value | Expr Fold Change |
|-----------------|--------------|------------------|------------------------------------------|--------|--------------|------------------|
| hsa-miR-212-3p  | 1.92E-02     | -2.587           | Experimentally Observed                  | MMP9   | 3.63E-02     | 7.262            |
| hsa-miR-302d-3p | 2.65E-02     | -2.399           | Experimentally Observed                  | STK4   | 9.12E-04     | 2.480            |
| hsa-miR-125b-5p | 4.58E-02     | -2.252           | Experimentally Observed                  | CDKN2A | 4.77E-03     | 4.656            |
| hsa-miR-24-3p   | 3.88E-02     | -1.832           | Experimentally Observed                  | CDKN2A | 4.77E-03     | 4.656            |
| hsa-miR-1-3p    | 4.96E-03     | -2.715           | Experimentally Observed.High (predicted) | IGF1   | 1.09E-02     | 2.716            |
| hsa-miR-103a-3p | 2.61E-02     | -2.121           | High (predicted)                         | P2RY12 | 1.88E-03     | 5.073            |
| hsa-miR-103a-3p | 2.61E-02     | -2.121           | High (predicted)                         | TGFBR2 | 4.78E-02     | 3.280            |
| hsa-miR-125b-5p | 4.58E-02     | -2.252           | Experimentally Observed.High (predicted) | CCR5   | 7.62E-04     | 13.487           |

|                  |          |        |                                    |         |          |        |
|------------------|----------|--------|------------------------------------|---------|----------|--------|
| hsa-miR-125b-5p  | 4.58E-02 | -2.252 | High (predicted)<br>Experimentally | TNFAIP3 | 8.71E-03 | 4.491  |
| hsa-miR-133a-3p  | 1.45E-02 | -2.375 | Observed                           | RUNX2   | 4.37E-04 | 5.975  |
| hsa-miR-143-3p   | 9.54E-03 | -3.585 | High (predicted)                   | SELL    | 6.50E-03 | 8.128  |
| hsa-miR-143-3p   | 9.54E-03 | -3.585 | High (predicted)<br>Experimentally | SFRP4   | 1.69E-02 | 8.336  |
| hsa-miR-15a-5p   | 1.90E-02 | -2.166 | Observed<br>Experimentally         | FLT3    | 1.02E-02 | 5.912  |
| hsa-miR-15a-5p   | 1.90E-02 | -2.166 | Observed<br>Experimentally         | IGF1    | 1.09E-02 | 2.716  |
| hsa-miR-15a-5p   | 1.90E-02 | -2.166 | Observed.High<br>(predicted)       | KCNN4   | 3.41E-02 | 3.789  |
| hsa-miR-15a-5p   | 1.90E-02 | -2.166 | High (predicted)                   | SLIT2   | 1.59E-03 | 2.813  |
| hsa-miR-106b-5p  | 3.04E-02 | -2.348 | High (predicted)<br>Experimentally | CTSK    | 9.64E-03 | 2.968  |
| hsa-miR-106b-5p  | 3.04E-02 | -2.348 | Observed.High<br>(predicted)       | TGFBR2  | 4.78E-02 | 3.280  |
| hsa-miR-185-5p   | 2.67E-02 | -2.574 | High (predicted)                   | CD40LG  | 5.81E-05 | 37.872 |
| hsa-miR-185-5p   | 2.67E-02 | -2.574 | High (predicted)                   | CTSK    | 9.64E-03 | 2.968  |
| hsa-miR-185-5p   | 2.67E-02 | -2.574 | High (predicted)<br>Experimentally | CXCL9   | 3.94E-04 | 64.052 |
| hsa-miR-193a-5p  | 4.68E-02 | -1.699 | Observed                           | IL2RG   | 1.92E-05 | 14.873 |
| hsa-miR-19b-1-5p | 1.60E-02 | -2.461 | High (predicted)<br>Experimentally | P2RY12  | 1.88E-03 | 5.073  |
| hsa-miR-203a-3p  | 4.17E-03 | -3.385 | Observed                           | RUNX2   | 4.37E-04 | 5.975  |
| hsa-miR-22-3p    | 7.27E-03 | -4.686 | High (predicted)                   | CSF1R   | 3.28E-03 | 4.699  |
| hsa-miR-22-3p    | 7.27E-03 | -4.686 | High (predicted)                   | NLRP3   | 1.43E-02 | 4.021  |
| hsa-miR-22-3p    | 7.27E-03 | -4.686 | High (predicted)                   | PRKCB   | 4.05E-04 | 10.044 |
| hsa-miR-24-3p    | 3.88E-02 | -1.832 | High (predicted)                   | FASLG   | 1.52E-05 | 17.708 |
| hsa-miR-24-3p    | 3.88E-02 | -1.832 | High (predicted)<br>Experimentally | IFNG    | 6.86E-03 | 5.864  |
| hsa-miR-26a-5p   | 2.95E-02 | -1.913 | Observed                           | TGFBR2  | 4.78E-02 | 3.280  |
| hsa-miR-27b-3p   | 6.08E-03 | -4.055 | High (predicted)<br>Experimentally | GOLM1   | 1.77E-02 | 2.101  |
| hsa-miR-27b-3p   | 6.08E-03 | -4.055 | Observed                           | IGF1    | 1.09E-02 | 2.716  |
| hsa-miR-302d-3p  | 2.65E-02 | -2.399 | High (predicted)                   | TGFBR2  | 4.78E-02 | 3.280  |
| hsa-miR-296-5p   | 4.12E-02 | -2.217 | High (predicted)                   | KCNN4   | 3.41E-02 | 3.789  |

|                 |          |        |                                          |         |          |       |
|-----------------|----------|--------|------------------------------------------|---------|----------|-------|
| hsa-miR-29c-3p  | 1.12E-02 | -3.142 | Experimentally Observed.High (predicted) | COL1A2  | 2.30E-02 | 2.879 |
| hsa-miR-29c-3p  | 1.12E-02 | -3.142 | Experimentally Observed.High (predicted) | COL3A1  | 9.35E-03 | 3.543 |
| hsa-miR-29c-3p  | 1.12E-02 | -3.142 | Experimentally Observed.High (predicted) | TNFAIP3 | 8.71E-03 | 4.491 |
| hsa-miR-30c-5p  | 4.34E-02 | -1.909 | Experimentally Observed.High (predicted) | RUNX2   | 4.37E-04 | 5.975 |
| hsa-miR-30c-5p  | 4.34E-02 | -1.909 | High (predicted)                         | SOCS1   | 1.97E-03 | 3.929 |
| hsa-miR-328-3p  | 3.01E-02 | -2.110 | High (predicted)                         | PRF1    | 1.53E-04 | 6.099 |
| hsa-miR-376a-3p | 2.56E-03 | -2.627 | High (predicted)                         | IL7     | 2.24E-03 | 6.228 |
| hsa-miR-409-3p  | 4.21E-02 | -1.773 | High (predicted)                         | TNFSF14 | 6.00E-03 | 8.943 |
| hsa-miR-423-5p  | 2.15E-02 | -2.171 | High (predicted)                         | SELL    | 6.50E-03 | 8.128 |
| hsa-miR-423-5p  | 2.15E-02 | -2.171 | High (predicted)                         | THY1    | 2.81E-02 | 6.811 |
| hsa-miR-499a-5p | 6.18E-03 | -3.810 | High (predicted)                         | VAV3    | 6.05E-03 | 2.641 |
| hsa-miR-744-5p  | 3.05E-02 | -2.097 | High (predicted)                         | THY1    | 2.81E-02 | 6.811 |
| hsa-miR-9-3p    | 3.90E-03 | -2.488 | High (predicted)                         | IL4     | 2.90E-02 | 2.336 |
| hsa-miR-9-5p    | 3.53E-03 | -2.877 | High (predicted)                         | VAV3    | 6.05E-03 | 2.641 |

### Extracellular matrix

| DEM ID          | Expr p-value | Expr Fold Change | Confidence                               | DEG ID | Expr p-value | Expr Fold Change |
|-----------------|--------------|------------------|------------------------------------------|--------|--------------|------------------|
| hsa-miR-212-3p  | 1.92E-02     | -2.587           | Experimentally Observed                  | MMP9   | 3.63E-02     | 7.262            |
| hsa-miR-125b-5p | 4.58E-02     | -2.252           | Experimentally Observed                  | CDKN2A | 4.77E-03     | 4.656            |
| hsa-miR-24-3p   | 3.88E-02     | -1.832           | Experimentally Observed                  | CDKN2A | 4.77E-03     | 4.656            |
| hsa-miR-1-3p    | 4.96E-03     | -2.715           | Experimentally Observed.High (predicted) | IGF1   | 1.09E-02     | 2.716            |
| hsa-miR-15a-5p  | 1.90E-02     | -2.166           | Experimentally Observed                  | IGF1   | 1.09E-02     | 2.716            |
| hsa-miR-106b-5p | 3.04E-02     | -2.348           | High (predicted)                         | CTSK   | 9.64E-03     | 2.968            |
| hsa-miR-185-5p  | 2.67E-02     | -2.574           | High (predicted)                         | CTSK   | 9.64E-03     | 2.968            |

|                 |          |        |                                                |         |          |        |
|-----------------|----------|--------|------------------------------------------------|---------|----------|--------|
| hsa-miR-22-3p   | 7.27E-03 | -4.686 | High (predicted)                               | CSF1R   | 3.28E-03 | 4.699  |
| hsa-miR-24-3p   | 3.88E-02 | -1.832 | High (predicted)                               | IFNG    | 6.86E-03 | 5.864  |
| hsa-miR-27b-3p  | 6.08E-03 | -4.055 | Experimentally<br>Observed                     | IGF1    | 1.09E-02 | 2.716  |
| hsa-miR-29c-3p  | 1.12E-02 | -3.142 | Experimentally<br>Observed.High<br>(predicted) | COL3A1  | 9.35E-03 | 3.543  |
| hsa-miR-376a-3p | 2.56E-03 | -2.627 | High (predicted)                               | IL7     | 2.24E-03 | 6.228  |
| hsa-miR-423-5p  | 2.15E-02 | -2.171 | High (predicted)                               | THY1    | 2.81E-02 | 6.811  |
| hsa-miR-744-5p  | 3.05E-02 | -2.097 | High (predicted)                               | THY1    | 2.81E-02 | 6.811  |
| hsa-miR-9-3p    | 3.90E-03 | -2.488 | High (predicted)                               | IL4     | 2.90E-02 | 2.336  |
| hsa-miR-155-5p  | 6.53E-05 | 3.781  | Experimentally<br>Observed                     | MET     | 3.40E-03 | -2.488 |
| hsa-miR-221-3p  | 6.50E-03 | -4.286 | Experimentally<br>Observed.High<br>(predicted) | PIK3R1  | 4.08E-02 | 2.670  |
| hsa-miR-29c-3p  | 1.12E-02 | -3.142 | Experimentally<br>Observed                     | PIK3R1  | 4.08E-02 | 2.670  |
| hsa-miR-106b-5p | 3.04E-02 | -2.348 | Experimentally<br>Observed                     | BCL2L11 | 3.29E-02 | 2.359  |
| hsa-miR-193a-5p | 4.68E-02 | -1.699 | High (predicted)                               | BCL2L11 | 3.29E-02 | 2.359  |
| hsa-miR-221-3p  | 6.50E-03 | -4.286 | Experimentally<br>Observed                     | BCL2L11 | 3.29E-02 | 2.359  |
| hsa-miR-24-3p   | 3.88E-02 | -1.832 | High (predicted)                               | BCL2L11 | 3.29E-02 | 2.359  |
| hsa-miR-29c-3p  | 1.12E-02 | -3.142 | High (predicted)                               | CASP8   | 3.27E-04 | 6.203  |
| hsa-miR-376a-3p | 2.56E-03 | -2.627 | High (predicted)                               | CASP8   | 3.27E-04 | 6.203  |
| hsa-miR-25-3p   | 4.50E-02 | -2.008 | Experimentally<br>Observed                     | BCL2L11 | 3.29E-02 | 2.359  |
| hsa-miR-1-3p    | 4.96E-03 | -2.715 | Experimentally<br>Observed                     | ANPEP   | 7.34E-03 | 4.510  |
| hsa-miR-127-3p  | 4.01E-02 | -1.909 | High (predicted)                               | SMPD3   | 2.70E-04 | 19.071 |
| hsa-miR-106b-5p | 3.04E-02 | -2.348 | High (predicted)                               | CCNG2   | 3.80E-02 | 2.907  |
| hsa-miR-224-5p  | 1.81E-02 | -3.246 | High (predicted)                               | PARVG   | 3.85E-03 | 5.101  |
| hsa-miR-30c-5p  | 4.34E-02 | -1.909 | Experimentally<br>Observed                     | ANPEP   | 7.34E-03 | 4.510  |
| hsa-miR-378a-5p | 2.80E-03 | -3.147 | High (predicted)                               | CCNG2   | 3.80E-02 | 2.907  |
| hsa-miR-423-5p  | 2.15E-02 | -2.171 | High (predicted)                               | ANPEP   | 7.34E-03 | 4.510  |

## Hypertrophy

| DEM ID          | Expr p-value | Expr Fold Change | Confidence                               | DEG ID  | Expr p-value | Expr Fold Change |
|-----------------|--------------|------------------|------------------------------------------|---------|--------------|------------------|
| hsa-miR-212-3p  | 1.92E-02     | -2.587           | Experimentally Observed                  | MMP9    | 3.63E-02     | 7.262            |
| hsa-miR-1-3p    | 4.96E-03     | -2.715           | Experimentally Observed.High (predicted) | IGF1    | 1.09E-02     | 2.716            |
| hsa-miR-15a-5p  | 1.90E-02     | -2.166           | Experimentally Observed                  | IGF1    | 1.09E-02     | 2.716            |
| hsa-miR-27b-3p  | 6.08E-03     | -4.055           | Experimentally Observed                  | IGF1    | 1.09E-02     | 2.716            |
| hsa-miR-376a-3p | 2.56E-03     | -2.627           | High (predicted)                         | IL7     | 2.24E-03     | 6.228            |
| hsa-miR-9-3p    | 3.90E-03     | -2.488           | High (predicted)                         | IL4     | 2.90E-02     | 2.336            |
| hsa-miR-221-3p  | 6.50E-03     | -4.286           | Experimentally Observed.High (predicted) | PIK3R1  | 4.08E-02     | 2.670            |
| hsa-miR-29c-3p  | 1.12E-02     | -3.142           | Experimentally Observed                  | PIK3R1  | 4.08E-02     | 2.670            |
| hsa-miR-103a-3p | 2.61E-02     | -2.121           | High (predicted)                         | TGFBR2  | 4.78E-02     | 3.280            |
| hsa-miR-125b-5p | 4.58E-02     | -2.252           | High (predicted)                         | TNFAIP3 | 8.71E-03     | 4.491            |
| hsa-miR-133a-3p | 1.45E-02     | -2.375           | Experimentally Observed                  | RUNX2   | 4.37E-04     | 5.975            |
| hsa-miR-15a-5p  | 1.90E-02     | -2.166           | High (predicted)                         | SLIT2   | 1.59E-03     | 2.813            |
| hsa-miR-106b-5p | 3.04E-02     | -2.348           | Experimentally Observed.High (predicted) | TGFBR2  | 4.78E-02     | 3.280            |
| hsa-miR-203a-3p | 4.17E-03     | -3.385           | Experimentally Observed                  | RUNX2   | 4.37E-04     | 5.975            |
| hsa-miR-22-3p   | 7.27E-03     | -4.686           | High (predicted)                         | PRKCB   | 4.05E-04     | 10.044           |
| hsa-miR-24-3p   | 3.88E-02     | -1.832           | High (predicted)                         | FASLG   | 1.52E-05     | 17.708           |
| hsa-miR-26a-5p  | 2.95E-02     | -1.913           | Experimentally Observed                  | TGFBR2  | 4.78E-02     | 3.280            |
| hsa-miR-302d-3p | 2.65E-02     | -2.399           | High (predicted)                         | TGFBR2  | 4.78E-02     | 3.280            |
| hsa-miR-29c-3p  | 1.12E-02     | -3.142           | Experimentally Observed.High (predicted) | TNFAIP3 | 8.71E-03     | 4.491            |
| hsa-miR-30c-5p  | 4.34E-02     | -1.909           | Experimentally Observed.High (predicted) | RUNX2   | 4.37E-04     | 5.975            |

|                 |          |        |                  |        |          |        |
|-----------------|----------|--------|------------------|--------|----------|--------|
| hsa-miR-499a-5p | 6.18E-03 | -3.810 | High (predicted) | VAV3   | 6.05E-03 | 2.641  |
| hsa-miR-9-5p    | 3.53E-03 | -2.877 | High (predicted) | VAV3   | 6.05E-03 | 2.641  |
| hsa-miR-1-3p    | 4.96E-03 | -2.715 | High (predicted) | NFATC2 | 1.62E-02 | 3.036  |
| hsa-miR-143-3p  | 9.54E-03 | -3.585 | High (predicted) | IL18   | 1.27E-02 | 4.807  |
|                 |          |        | Experimentally   |        |          |        |
| hsa-miR-155-5p  | 6.53E-05 | 3.781  | Observed         | RHEB   | 2.65E-02 | -2.088 |
|                 |          |        | Experimentally   |        |          |        |
| hsa-miR-106b-5p | 3.04E-02 | -2.348 | Observed         | E2F2   | 2.72E-02 | 4.283  |
| hsa-miR-23b-3p  | 1.01E-02 | -3.178 | High (predicted) | IL18   | 1.27E-02 | 4.807  |
|                 |          |        | Experimentally   |        |          |        |
| hsa-miR-24-3p   | 3.88E-02 | -1.832 | Observed         | E2F2   | 2.72E-02 | 4.283  |
| hsa-miR-296-5p  | 4.12E-02 | -2.217 | High (predicted) | E2F2   | 2.72E-02 | 4.283  |
| hsa-miR-365a-3p | 2.14E-03 | -2.687 | High (predicted) | E2F2   | 2.72E-02 | 4.283  |
| hsa-miR-422a    | 9.63E-03 | -2.624 | High (predicted) | PIK3CG | 1.09E-03 | 5.372  |

### Contraction of heart and of cardiac muscle and contractility of heart

| DEM ID          | Expr p-value | Expr Fold Change | Confidence       | DEG ID | Expr p-value | Expr Fold Change |
|-----------------|--------------|------------------|------------------|--------|--------------|------------------|
|                 |              |                  | Experimentally   |        |              |                  |
| hsa-miR-212-3p  | 1.92E-02     | -2.587           | Observed         | MMP9   | 3.63E-02     | 7.262            |
| hsa-miR-22-3p   | 7.27E-03     | -4.686           | High (predicted) | PRKCB  | 4.05E-04     | 10.044           |
| hsa-miR-24-3p   | 3.88E-02     | -1.832           | High (predicted) | FASLG  | 1.52E-05     | 17.708           |
| hsa-miR-499a-5p | 6.18E-03     | -3.810           | High (predicted) | VAV3   | 6.05E-03     | 2.641            |
| hsa-miR-9-5p    | 3.53E-03     | -2.877           | High (predicted) | VAV3   | 6.05E-03     | 2.641            |
| hsa-miR-143-3p  | 9.54E-03     | -3.585           | High (predicted) | IL18   | 1.27E-02     | 4.807            |
| hsa-miR-23b-3p  | 1.01E-02     | -3.178           | High (predicted) | IL18   | 1.27E-02     | 4.807            |
| hsa-miR-422a    | 9.63E-03     | -2.624           | High (predicted) | PIK3CG | 1.09E-03     | 5.372            |
| hsa-miR-24-3p   | 3.88E-02     | -1.832           | High (predicted) | IFNG   | 6.86E-03     | 5.864            |
|                 |              |                  | Experimentally   |        |              |                  |
| hsa-miR-155-5p  | 6.53E-05     | 3.781            | Observed         | MET    | 3.40E-03     | -2.488           |
| hsa-miR-296-5p  | 4.12E-02     | -2.217           | High (predicted) | TRPM2  | 2.25E-03     | 3.771            |

### Inflammation

| DEM ID          | Expr p-value | Expr Fold Change | Confidence       | DEG ID | Expr p-value | Expr Fold Change |
|-----------------|--------------|------------------|------------------|--------|--------------|------------------|
|                 |              |                  | Experimentally   |        |              |                  |
| hsa-miR-212-3p  | 1.92E-02     | -2.587           | Observed         | MMP9   | 3.63E-02     | 7.262            |
| hsa-miR-22-3p   | 7.27E-03     | -4.686           | High (predicted) | PRKCB  | 4.05E-04     | 10.044           |
| hsa-miR-24-3p   | 3.88E-02     | -1.832           | High (predicted) | FASLG  | 1.52E-05     | 17.708           |
| hsa-miR-499a-5p | 6.18E-03     | -3.810           | High (predicted) | VAV3   | 6.05E-03     | 2.641            |

|                 |          |        |                              |         |          |       |
|-----------------|----------|--------|------------------------------|---------|----------|-------|
| hsa-miR-9-5p    | 3.53E-03 | -2.877 | High (predicted)             | VAV3    | 6.05E-03 | 2.641 |
| hsa-miR-143-3p  | 9.54E-03 | -3.585 | High (predicted)             | IL18    | 1.27E-02 | 4.807 |
| hsa-miR-23b-3p  | 1.01E-02 | -3.178 | High (predicted)             | IL18    | 1.27E-02 | 4.807 |
| hsa-miR-422a    | 9.63E-03 | -2.624 | High (predicted)             | PIK3CG  | 1.09E-03 | 5.372 |
| hsa-miR-24-3p   | 3.88E-02 | -1.832 | High (predicted)             | IFNG    | 6.86E-03 | 5.864 |
| hsa-miR-296-5p  | 4.12E-02 | -2.217 | High (predicted)             | TRPM2   | 2.25E-03 | 3.771 |
|                 |          |        | Experimentally Observed.High |         |          |       |
| hsa-miR-1-3p    | 4.96E-03 | -2.715 | (predicted)                  | IGF1    | 1.09E-02 | 2.716 |
|                 |          |        | Experimentally Observed      | IGF1    | 1.09E-02 | 2.716 |
| hsa-miR-15a-5p  | 1.90E-02 | -2.166 | Experimentally Observed      | IGF1    | 1.09E-02 | 2.716 |
| hsa-miR-27b-3p  | 6.08E-03 | -4.055 | High (predicted)             | IGF1    | 1.09E-02 | 2.716 |
| hsa-miR-376a-3p | 2.56E-03 | -2.627 | High (predicted)             | IL7     | 2.24E-03 | 6.228 |
| hsa-miR-9-3p    | 3.90E-03 | -2.488 | High (predicted)             | IL4     | 2.90E-02 | 2.336 |
|                 |          |        | Experimentally Observed.High |         |          |       |
| hsa-miR-221-3p  | 6.50E-03 | -4.286 | (predicted)                  | PIK3R1  | 4.08E-02 | 2.670 |
|                 |          |        | Experimentally Observed      | PIK3R1  | 4.08E-02 | 2.670 |
| hsa-miR-29c-3p  | 1.12E-02 | -3.142 | High (predicted)             | TGFBR2  | 4.78E-02 | 3.280 |
| hsa-miR-103a-3p | 2.61E-02 | -2.121 | High (predicted)             | TNFAIP3 | 8.71E-03 | 4.491 |
| hsa-miR-125b-5p | 4.58E-02 | -2.252 | High (predicted)             | SLIT2   | 1.59E-03 | 2.813 |
| hsa-miR-15a-5p  | 1.90E-02 | -2.166 | High (predicted)             |         |          |       |
|                 |          |        | Experimentally Observed.High |         |          |       |
| hsa-miR-106b-5p | 3.04E-02 | -2.348 | (predicted)                  | TGFBR2  | 4.78E-02 | 3.280 |
|                 |          |        | Experimentally Observed      | TGFBR2  | 4.78E-02 | 3.280 |
| hsa-miR-26a-5p  | 2.95E-02 | -1.913 | High (predicted)             | TGFBR2  | 4.78E-02 | 3.280 |
| hsa-miR-302d-3p | 2.65E-02 | -2.399 | Experimentally Observed.High |         |          |       |
|                 |          |        | (predicted)                  | TNFAIP3 | 8.71E-03 | 4.491 |
| hsa-miR-29c-3p  | 1.12E-02 | -3.142 | High (predicted)             | NFATC2  | 1.62E-02 | 3.036 |
| hsa-miR-1-3p    | 4.96E-03 | -2.715 | Experimentally Observed      | E2F2    | 2.72E-02 | 4.283 |
| hsa-miR-106b-5p | 3.04E-02 | -2.348 | Experimentally Observed      | E2F2    | 2.72E-02 | 4.283 |
| hsa-miR-24-3p   | 3.88E-02 | -1.832 | High (predicted)             | E2F2    | 2.72E-02 | 4.283 |
| hsa-miR-296-5p  | 4.12E-02 | -2.217 | High (predicted)             | E2F2    | 2.72E-02 | 4.283 |
| hsa-miR-365a-3p | 2.14E-03 | -2.687 | High (predicted)             | E2F2    | 2.72E-02 | 4.283 |

|                  |          |        |                                          |         |          |        |
|------------------|----------|--------|------------------------------------------|---------|----------|--------|
| hsa-miR-125b-5p  | 4.58E-02 | -2.252 | Experimentally Observed                  | CDKN2A  | 4.77E-03 | 4.656  |
| hsa-miR-24-3p    | 3.88E-02 | -1.832 | Experimentally Observed                  | CDKN2A  | 4.77E-03 | 4.656  |
| hsa-miR-22-3p    | 7.27E-03 | -4.686 | High (predicted)                         | CSF1R   | 3.28E-03 | 4.699  |
| hsa-miR-29c-3p   | 1.12E-02 | -3.142 | Experimentally Observed.High (predicted) | COL3A1  | 9.35E-03 | 3.543  |
| hsa-miR-106b-5p  | 3.04E-02 | -2.348 | Experimentally Observed                  | BCL2L11 | 3.29E-02 | 2.359  |
| hsa-miR-193a-5p  | 4.68E-02 | -1.699 | High (predicted)                         | BCL2L11 | 3.29E-02 | 2.359  |
| hsa-miR-221-3p   | 6.50E-03 | -4.286 | Experimentally Observed                  | BCL2L11 | 3.29E-02 | 2.359  |
| hsa-miR-24-3p    | 3.88E-02 | -1.832 | High (predicted)                         | BCL2L11 | 3.29E-02 | 2.359  |
| hsa-miR-29c-3p   | 1.12E-02 | -3.142 | High (predicted)                         | CASP8   | 3.27E-04 | 6.203  |
| hsa-miR-376a-3p  | 2.56E-03 | -2.627 | High (predicted)                         | CASP8   | 3.27E-04 | 6.203  |
| hsa-miR-25-3p    | 4.50E-02 | -2.008 | Experimentally Observed                  | BCL2L11 | 3.29E-02 | 2.359  |
| hsa-miR-103a-3p  | 2.61E-02 | -2.121 | High (predicted)                         | P2RY12  | 1.88E-03 | 5.073  |
| hsa-miR-125b-5p  | 4.58E-02 | -2.252 | Experimentally Observed.High (predicted) | CCR5    | 7.62E-04 | 13.487 |
| hsa-miR-143-3p   | 9.54E-03 | -3.585 | High (predicted)                         | SELL    | 6.50E-03 | 8.128  |
| hsa-miR-15a-5p   | 1.90E-02 | -2.166 | Experimentally Observed                  | FLT3    | 1.02E-02 | 5.912  |
| hsa-miR-15a-5p   | 1.90E-02 | -2.166 | Experimentally Observed.High (predicted) | KCNN4   | 3.41E-02 | 3.789  |
| hsa-miR-185-5p   | 2.67E-02 | -2.574 | High (predicted)                         | CD40LG  | 5.81E-05 | 37.872 |
| hsa-miR-185-5p   | 2.67E-02 | -2.574 | High (predicted)                         | CXCL9   | 3.94E-04 | 64.052 |
| hsa-miR-193a-5p  | 4.68E-02 | -1.699 | Experimentally Observed                  | IL2RG   | 1.92E-05 | 14.873 |
| hsa-miR-19b-1-5p | 1.60E-02 | -2.461 | High (predicted)                         | P2RY12  | 1.88E-03 | 5.073  |
| hsa-miR-22-3p    | 7.27E-03 | -4.686 | High (predicted)                         | NLRP3   | 1.43E-02 | 4.021  |
| hsa-miR-296-5p   | 4.12E-02 | -2.217 | High (predicted)                         | KCNN4   | 3.41E-02 | 3.789  |
| hsa-miR-29c-3p   | 1.12E-02 | -3.142 | Experimentally Observed.High (predicted) | COL1A2  | 2.30E-02 | 2.879  |
| hsa-miR-30c-5p   | 4.34E-02 | -1.909 | High (predicted)                         | SOCS1   | 1.97E-03 | 3.929  |

|                 |          |        |                  |           |          |        |
|-----------------|----------|--------|------------------|-----------|----------|--------|
| hsa-miR-328-3p  | 3.01E-02 | -2.110 | High (predicted) | PRF1      | 1.53E-04 | 6.099  |
| hsa-miR-409-3p  | 4.21E-02 | -1.773 | High (predicted) | TNFSF14   | 6.00E-03 | 8.943  |
| hsa-miR-423-5p  | 2.15E-02 | -2.171 | High (predicted) | SELL      | 6.50E-03 | 8.128  |
| hsa-miR-99a-5p  | 1.43E-02 | -2.885 | High (predicted) | VNN1      | 3.60E-02 | 4.331  |
| hsa-miR-221-3p  | 6.50E-03 | -4.286 | High (predicted) | HNMT      | 1.89E-03 | 2.539  |
| hsa-miR-101-3p  | 4.17E-02 | -2.891 | High (predicted) | DDIT4     | 6.61E-03 | 4.020  |
| hsa-miR-22-3p   | 7.27E-03 | -4.686 | High (predicted) | DDIT4     | 6.61E-03 | 4.020  |
|                 |          |        | Experimentally   |           |          |        |
| hsa-miR-221-3p  | 6.50E-03 | -4.286 | Observed         | DDIT4     | 6.61E-03 | 4.020  |
|                 |          |        | Experimentally   |           |          |        |
| hsa-miR-1-3p    | 4.96E-03 | -2.715 | Observed         | NOTCH2    | 2.41E-02 | 2.302  |
| hsa-miR-1-3p    | 4.96E-03 | -2.715 | High (predicted) | TNFAIP8L2 | 2.55E-02 | 4.121  |
|                 |          |        | Experimentally   |           |          |        |
| hsa-miR-1-3p    | 4.96E-03 | -2.715 | Observed         | UNC93B1   | 1.33E-02 | 2.316  |
| hsa-miR-99a-5p  | 1.43E-02 | -2.885 | High (predicted) | SPN       | 2.00E-02 | 2.393  |
| hsa-miR-101-3p  | 4.17E-02 | -2.891 | High (predicted) | ASPN      | 5.56E-03 | 5.012  |
| hsa-miR-101-3p  | 4.17E-02 | -2.891 | High (predicted) | COTL1     | 1.84E-02 | 3.905  |
|                 |          |        | Experimentally   |           |          |        |
| hsa-miR-101-3p  | 4.17E-02 | -2.891 | Observed         | ICOS      | 6.66E-03 | 5.007  |
| hsa-miR-103a-3p | 2.61E-02 | -2.121 | High (predicted) | BTLA      | 2.37E-03 | 8.616  |
|                 |          |        | Experimentally   |           |          |        |
| hsa-miR-103a-3p | 2.61E-02 | -2.121 | Observed         | ICOS      | 6.66E-03 | 5.007  |
| hsa-miR-103a-3p | 2.61E-02 | -2.121 | High (predicted) | KLRB1     | 5.82E-04 | 17.677 |
| hsa-miR-1233-3p | 7.57E-03 | -2.523 | High (predicted) | BMF       | 6.39E-03 | 3.138  |
| hsa-miR-1233-3p | 7.57E-03 | -2.523 | High (predicted) | CCL14     | 2.45E-02 | 4.110  |
| hsa-miR-1233-3p | 7.57E-03 | -2.523 | High (predicted) | CCL28     | 3.46E-03 | 4.514  |
| hsa-miR-1233-3p | 7.57E-03 | -2.523 | High (predicted) | CLEC4D    | 2.08E-03 | 7.891  |
| hsa-miR-1233-3p | 7.57E-03 | -2.523 | High (predicted) | SH2D1A    | 5.71E-05 | 11.640 |
| hsa-miR-1233-3p | 7.57E-03 | -2.523 | High (predicted) | UBE2L6    | 4.94E-02 | 2.116  |
|                 |          |        | Experimentally   |           |          |        |
|                 |          |        | Observed.High    |           |          |        |
| hsa-miR-125b-5p | 4.58E-02 | -2.252 | (predicted)      | BMF       | 6.39E-03 | 3.138  |
| hsa-miR-125b-5p | 4.58E-02 | -2.252 | High (predicted) | CD69      | 1.27E-05 | 20.025 |
| hsa-miR-125b-5p | 4.58E-02 | -2.252 | High (predicted) | GCNT1     | 4.48E-03 | 3.983  |
| hsa-miR-125b-5p | 4.58E-02 | -2.252 | High (predicted) | IRF4      | 3.49E-03 | 5.957  |
| hsa-miR-125b-5p | 4.58E-02 | -2.252 | High (predicted) | PRDM1     | 6.82E-05 | 26.789 |
| hsa-miR-125b-5p | 4.58E-02 | -2.252 | High (predicted) | PSTPIP2   | 8.71E-03 | 4.463  |
| hsa-miR-125b-5p | 4.58E-02 | -2.252 | High (predicted) | SEMA4D    | 3.00E-03 | 8.821  |
| hsa-miR-127-3p  | 4.01E-02 | -1.909 | High (predicted) | HLA-DOA   | 5.44E-03 | 5.601  |

|                  |          |        |                  |          |          |        |
|------------------|----------|--------|------------------|----------|----------|--------|
| hsa-miR-127-3p   | 4.01E-02 | -1.909 | Experimentally   |          |          |        |
| hsa-miR-127-3p   | 4.01E-02 | -1.909 | Observed         | PRDM1    | 6.82E-05 | 26.789 |
| hsa-miR-133a-3p  | 1.45E-02 | -2.375 | High (predicted) | SDC1     | 1.32E-02 | 3.663  |
| hsa-miR-143-3p   | 9.54E-03 | -3.585 | High (predicted) | CXCL11   | 2.07E-02 | 14.705 |
| hsa-miR-145-3p   | 3.93E-03 | -2.508 | High (predicted) | HLA-DOA  | 5.44E-03 | 5.601  |
| hsa-miR-148a-3p  | 4.41E-02 | -2.648 | High (predicted) | GFI1     | 3.78E-06 | 40.106 |
| hsa-miR-148a-3p  | 4.41E-02 | -2.648 | High (predicted) | CCL14    | 2.45E-02 | 4.110  |
| hsa-miR-148a-3p  | 4.41E-02 | -2.648 | High (predicted) | CEBPE    | 4.33E-03 | 3.871  |
| hsa-miR-148a-3p  | 4.41E-02 | -2.648 | High (predicted) | HLA-A    | 5.37E-03 | 2.185  |
| hsa-miR-148a-3p  | 4.41E-02 | -2.648 | High (predicted) | MAFB     | 2.66E-02 | 3.069  |
| hsa-miR-151a-3p  | 2.50E-02 | -4.893 | High (predicted) | BTLA     | 2.37E-03 | 8.616  |
| hsa-miR-151a-3p  | 2.50E-02 | -4.893 | High (predicted) | CD48     | 4.49E-05 | 25.693 |
| hsa-miR-151a-5p  | 7.94E-03 | -2.319 | High (predicted) | FANCA    | 1.44E-03 | 4.996  |
| hsa-miR-151a-5p  | 7.94E-03 | -2.319 | High (predicted) | GNLY     | 5.12E-03 | 6.940  |
| hsa-miR-15a-5p   | 1.90E-02 | -2.166 | High (predicted) | BTLA     | 2.37E-03 | 8.616  |
|                  |          |        | Experimentally   |          |          |        |
| hsa-miR-15a-5p   | 1.90E-02 | -2.166 | Observed         | NOTCH2   | 2.41E-02 | 2.302  |
| hsa-miR-15a-5p   | 1.90E-02 | -2.166 | High (predicted) | TNFSF13B | 5.53E-03 | 5.399  |
|                  |          |        | Experimentally   |          |          |        |
| hsa-miR-15a-5p   | 1.90E-02 | -2.166 | Observed         | WIPF1    | 4.75E-03 | 2.815  |
| hsa-miR-106b-5p  | 3.04E-02 | -2.348 | High (predicted) | CD69     | 1.27E-05 | 20.025 |
| hsa-miR-106b-5p  | 3.04E-02 | -2.348 | High (predicted) | PDCD1LG2 | 3.30E-02 | 2.707  |
| hsa-miR-106b-5p  | 3.04E-02 | -2.348 | High (predicted) | STK17B   | 2.96E-02 | 3.004  |
| hsa-miR-185-5p   | 2.67E-02 | -2.574 | High (predicted) | AIM2     | 2.70E-04 | 34.077 |
| hsa-miR-185-5p   | 2.67E-02 | -2.574 | High (predicted) | BTLA     | 2.37E-03 | 8.616  |
| hsa-miR-185-5p   | 2.67E-02 | -2.574 | High (predicted) | CD84     | 1.14E-04 | 11.117 |
| hsa-miR-185-5p   | 2.67E-02 | -2.574 | High (predicted) | CXCL16   | 3.62E-02 | 3.047  |
| hsa-miR-185-5p   | 2.67E-02 | -2.574 | High (predicted) | SAMD9L   | 2.88E-02 | 2.984  |
| hsa-miR-185-5p   | 2.67E-02 | -2.574 | High (predicted) | TNFSF13  | 2.93E-02 | 2.186  |
| hsa-miR-192-5p   | 3.00E-02 | -1.896 | High (predicted) | CD48     | 4.49E-05 | 25.693 |
| hsa-miR-193a-5p  | 4.68E-02 | -1.699 | High (predicted) | CD27     | 6.67E-05 | 14.856 |
| hsa-miR-193a-5p  | 4.68E-02 | -1.699 | High (predicted) | CSF2RA   | 2.14E-05 | 6.063  |
| hsa-miR-19b-1-5p | 1.60E-02 | -2.461 | High (predicted) | CSF2RA   | 2.14E-05 | 6.063  |
| hsa-miR-19b-1-5p | 1.60E-02 | -2.461 | High (predicted) | CYTIP    | 3.82E-05 | 12.099 |
| hsa-miR-19b-1-5p | 1.60E-02 | -2.461 | High (predicted) | GPR174   | 5.37E-03 | 4.586  |
| hsa-miR-20a-3p   | 1.49E-02 | -2.092 | High (predicted) | ALOX5AP  | 2.96E-02 | 4.646  |
| hsa-miR-20a-3p   | 1.49E-02 | -2.092 | High (predicted) | BATF     | 1.04E-03 | 13.327 |
| hsa-miR-20a-3p   | 1.49E-02 | -2.092 | High (predicted) | CCL4     | 6.28E-06 | 20.663 |
| hsa-miR-20a-3p   | 1.49E-02 | -2.092 | High (predicted) | TRAF1    | 7.95E-04 | 5.095  |

|                 |          |        |                  |          |          |        |
|-----------------|----------|--------|------------------|----------|----------|--------|
| hsa-miR-22-3p   | 7.27E-03 | -4.686 | High (predicted) | GPR132   | 7.40E-03 | 3.341  |
| hsa-miR-22-3p   | 7.27E-03 | -4.686 | High (predicted) | TLR8     | 6.97E-03 | 7.087  |
| hsa-miR-22-5p   | 3.81E-03 | -2.591 | High (predicted) | RGS1     | 6.34E-04 | 19.413 |
|                 |          |        | Experimentally   |          |          |        |
| hsa-miR-221-3p  | 6.50E-03 | -4.286 | Observed         | BMF      | 6.39E-03 | 3.138  |
| hsa-miR-221-3p  | 6.50E-03 | -4.286 | High (predicted) | CXCL11   | 2.07E-02 | 14.705 |
| hsa-miR-221-3p  | 6.50E-03 | -4.286 | High (predicted) | MS4A1    | 1.19E-02 | 5.117  |
| hsa-miR-23b-3p  | 1.01E-02 | -3.178 | High (predicted) | MRC1     | 1.63E-02 | 4.006  |
| hsa-miR-23b-3p  | 1.01E-02 | -3.178 | High (predicted) | SCG5     | 3.55E-02 | 2.851  |
| hsa-miR-24-3p   | 3.88E-02 | -1.832 | High (predicted) | CXCR2    | 3.05E-02 | 2.404  |
| hsa-miR-24-3p   | 3.88E-02 | -1.832 | High (predicted) | PIM2     | 1.18E-03 | 7.447  |
| hsa-miR-24-3p   | 3.88E-02 | -1.832 | High (predicted) | SPN      | 2.00E-02 | 2.393  |
| hsa-miR-27b-3p  | 6.08E-03 | -4.055 | High (predicted) | MS4A7    | 3.15E-02 | 2.802  |
| hsa-miR-302d-3p | 2.65E-02 | -2.399 | High (predicted) | PDCD1LG2 | 3.30E-02 | 2.707  |
| hsa-miR-296-5p  | 4.12E-02 | -2.217 | High (predicted) | BMF      | 6.39E-03 | 3.138  |
| hsa-miR-296-5p  | 4.12E-02 | -2.217 | High (predicted) | CCL28    | 3.46E-03 | 4.514  |
| hsa-miR-296-5p  | 4.12E-02 | -2.217 | High (predicted) | CD300LF  | 5.57E-03 | 4.946  |
| hsa-miR-296-5p  | 4.12E-02 | -2.217 | High (predicted) | CD6      | 9.05E-06 | 40.352 |
| hsa-miR-296-5p  | 4.12E-02 | -2.217 | High (predicted) | CD8A     | 1.55E-05 | 25.013 |
| hsa-miR-296-5p  | 4.12E-02 | -2.217 | High (predicted) | CXCL10   | 1.71E-02 | 12.848 |
| hsa-miR-296-5p  | 4.12E-02 | -2.217 | High (predicted) | TNFSF13  | 2.93E-02 | 2.186  |
| hsa-miR-29c-3p  | 1.12E-02 | -3.142 | High (predicted) | BMF      | 6.39E-03 | 3.138  |
| hsa-miR-29c-3p  | 1.12E-02 | -3.142 | High (predicted) | COL4A4   | 3.91E-02 | 2.390  |
| hsa-miR-29c-3p  | 1.12E-02 | -3.142 | High (predicted) | ICOS     | 6.66E-03 | 5.007  |
| hsa-miR-29c-3p  | 1.12E-02 | -3.142 | High (predicted) | RGS1     | 6.34E-04 | 19.413 |
| hsa-miR-29c-3p  | 1.12E-02 | -3.142 | High (predicted) | TNFRSF9  | 6.78E-03 | 2.343  |
| hsa-miR-30c-5p  | 4.34E-02 | -1.909 | High (predicted) | CCL19    | 1.76E-02 | 16.140 |
| hsa-miR-30c-5p  | 4.34E-02 | -1.909 | High (predicted) | PRDM1    | 6.82E-05 | 26.789 |
| hsa-miR-30c-5p  | 4.34E-02 | -1.909 | High (predicted) | SCN9A    | 2.16E-02 | 2.735  |
| hsa-miR-30c-5p  | 4.34E-02 | -1.909 | High (predicted) | STIM2    | 3.64E-02 | 2.026  |
| hsa-miR-30c-5p  | 4.34E-02 | -1.909 | High (predicted) | TNFSF13B | 5.53E-03 | 5.399  |
| hsa-miR-324-5p  | 2.03E-02 | -2.855 | High (predicted) | CD84     | 1.14E-04 | 11.117 |
| hsa-miR-324-5p  | 2.03E-02 | -2.855 | High (predicted) | CTLA4    | 3.83E-03 | 10.680 |
| hsa-miR-324-5p  | 2.03E-02 | -2.855 | High (predicted) | P2RY13   | 3.36E-02 | 3.597  |
| hsa-miR-324-5p  | 2.03E-02 | -2.855 | High (predicted) | S1PR4    | 1.78E-04 | 7.144  |
| hsa-miR-328-3p  | 3.01E-02 | -2.110 | High (predicted) | PSTPIP2  | 8.71E-03 | 4.463  |
| hsa-miR-335-5p  | 2.05E-02 | -2.221 | High (predicted) | ALOX5AP  | 2.96E-02 | 4.646  |
| hsa-miR-335-5p  | 2.05E-02 | -2.221 | High (predicted) | PTPN22   | 7.35E-05 | 16.747 |
| hsa-miR-345-5p  | 1.38E-02 | -2.108 | High (predicted) | RGS1     | 6.34E-04 | 19.413 |

|                 |          |        |                  |         |          |        |
|-----------------|----------|--------|------------------|---------|----------|--------|
| hsa-miR-345-5p  | 1.38E-02 | -2.108 | High (predicted) | UBE2L6  | 4.94E-02 | 2.116  |
| hsa-miR-376a-3p | 2.56E-03 | -2.627 | High (predicted) | LILRA2  | 3.91E-02 | 3.122  |
| hsa-miR-376a-3p | 2.56E-03 | -2.627 | High (predicted) | RGS1    | 6.34E-04 | 19.413 |
| hsa-miR-376c-3p | 1.95E-02 | -1.990 | High (predicted) | PARP4   | 2.14E-02 | 2.002  |
| hsa-miR-422a    | 9.63E-03 | -2.624 | High (predicted) | CCR7    | 1.76E-03 | 14.696 |
| hsa-miR-378a-5p | 2.80E-03 | -3.147 | High (predicted) | FRZB    | 1.62E-03 | 5.883  |
| hsa-miR-379-5p  | 1.27E-02 | -2.367 | High (predicted) | CXCL11  | 2.07E-02 | 14.705 |
| hsa-miR-379-5p  | 1.27E-02 | -2.367 | High (predicted) | HLA-E   | 1.56E-02 | 2.118  |
| hsa-miR-379-5p  | 1.27E-02 | -2.367 | High (predicted) | ICOS    | 6.66E-03 | 5.007  |
| hsa-miR-379-5p  | 1.27E-02 | -2.367 | High (predicted) | IL18RAP | 1.28E-02 | 5.958  |
| hsa-miR-379-5p  | 1.27E-02 | -2.367 | High (predicted) | SIT1    | 1.59E-04 | 13.192 |
| hsa-miR-409-3p  | 4.21E-02 | -1.773 | High (predicted) | CCL28   | 3.46E-03 | 4.514  |
| hsa-miR-423-5p  | 2.15E-02 | -2.171 | High (predicted) | BMF     | 6.39E-03 | 3.138  |
| hsa-miR-423-5p  | 2.15E-02 | -2.171 | High (predicted) | CD72    | 7.17E-03 | 7.274  |
| hsa-miR-423-5p  | 2.15E-02 | -2.171 | High (predicted) | CD8A    | 1.55E-05 | 25.013 |
| hsa-miR-423-5p  | 2.15E-02 | -2.171 | High (predicted) | CXCL16  | 3.62E-02 | 3.047  |
| hsa-miR-423-5p  | 2.15E-02 | -2.171 | High (predicted) | PTK2B   | 3.13E-03 | 3.355  |
| hsa-miR-423-5p  | 2.15E-02 | -2.171 | High (predicted) | RAC2    | 1.02E-03 | 4.144  |
| hsa-miR-423-5p  | 2.15E-02 | -2.171 | High (predicted) | RGS1    | 6.34E-04 | 19.413 |
| hsa-miR-423-5p  | 2.15E-02 | -2.171 | High (predicted) | SRCIN1  | 3.40E-03 | 5.005  |
| hsa-miR-451a    | 1.69E-02 | -3.669 | High (predicted) | BATF    | 1.04E-03 | 13.327 |
| hsa-miR-451a    | 1.69E-02 | -3.669 | High (predicted) | CXCL16  | 3.62E-02 | 3.047  |
| hsa-miR-455-3p  | 1.49E-02 | -3.286 | High (predicted) | STK17B  | 2.96E-02 | 3.004  |
| hsa-miR-455-3p  | 1.49E-02 | -3.286 | High (predicted) | UBE2L6  | 4.94E-02 | 2.116  |
| hsa-miR-455-3p  | 1.49E-02 | -3.286 | High (predicted) | XCL1    | 4.38E-04 | 19.986 |
| hsa-miR-455-5p  | 1.18E-02 | -2.969 | High (predicted) | CD200R1 | 2.04E-02 | 2.552  |
| hsa-miR-455-5p  | 1.18E-02 | -2.969 | High (predicted) | FCAR    | 1.64E-02 | 2.964  |
| hsa-miR-455-5p  | 1.18E-02 | -2.969 | High (predicted) | MS4A7   | 3.15E-02 | 2.802  |
| hsa-miR-486-5p  | 4.58E-02 | -1.997 | High (predicted) | CD247   | 3.23E-05 | 17.934 |
| hsa-miR-486-5p  | 4.58E-02 | -1.997 | High (predicted) | PTGDR   | 3.00E-03 | 5.175  |
| hsa-miR-494-3p  | 8.19E-03 | -3.473 | High (predicted) | SLAMF1  | 2.85E-02 | 4.949  |
| hsa-miR-494-3p  | 8.19E-03 | -3.473 | High (predicted) | UBE2L6  | 4.94E-02 | 2.116  |
| hsa-miR-499a-5p | 6.18E-03 | -3.810 | High (predicted) | CXCL11  | 2.07E-02 | 14.705 |
|                 |          |        | Experimentally   |         |          |        |
| hsa-miR-532-5p  | 3.58E-02 | -1.943 | Observed         | RUNX3   | 1.48E-05 | 16.778 |
| hsa-miR-642a-5p | 7.76E-03 | -2.482 | High (predicted) | LTB     | 1.35E-02 | 8.556  |
| hsa-miR-28-5p   | 2.88E-02 | -2.216 | High (predicted) | CCL28   | 3.46E-03 | 4.514  |
| hsa-miR-28-5p   | 2.88E-02 | -2.216 | High (predicted) | EOMES   | 3.78E-06 | 27.454 |
| hsa-miR-744-5p  | 3.05E-02 | -2.097 | High (predicted) | BCL11B  | 1.45E-04 | 13.713 |

|                |          |        |                              |        |          |        |
|----------------|----------|--------|------------------------------|--------|----------|--------|
| hsa-miR-744-5p | 3.05E-02 | -2.097 | High (predicted)             | BLK    | 8.11E-04 | 12.334 |
| hsa-miR-744-5p | 3.05E-02 | -2.097 | High (predicted)             | CD37   | 3.12E-04 | 9.603  |
| hsa-miR-744-5p | 3.05E-02 | -2.097 | High (predicted)             | MMP25  | 1.56E-03 | 6.090  |
| hsa-miR-744-5p | 3.05E-02 | -2.097 | High (predicted)             | SRCIN1 | 3.40E-03 | 5.005  |
| hsa-miR-744-5p | 3.05E-02 | -2.097 | High (predicted)             | TCF7   | 1.70E-02 | 2.991  |
| hsa-miR-9-3p   | 3.90E-03 | -2.488 | High (predicted)             | MDK    | 4.11E-02 | 2.352  |
| hsa-miR-9-5p   | 3.53E-03 | -2.877 | High (predicted)             | CXCL11 | 2.07E-02 | 14.705 |
|                |          |        | Experimentally Observed.High |        |          |        |
| hsa-miR-9-5p   | 3.53E-03 | -2.877 | (predicted)                  | PRDM1  | 6.82E-05 | 26.789 |
| hsa-miR-25-3p  | 4.50E-02 | -2.008 | High (predicted)             | ASPN   | 5.56E-03 | 5.012  |
| hsa-miR-25-3p  | 4.50E-02 | -2.008 | High (predicted)             | BTLA   | 2.37E-03 | 8.616  |
| hsa-miR-25-3p  | 4.50E-02 | -2.008 | High (predicted)             | CD69   | 1.27E-05 | 20.025 |
|                |          |        | Experimentally Observed      |        |          |        |
| hsa-miR-25-3p  | 4.50E-02 | -2.008 | Observed                     | IKZF1  | 1.50E-05 | 17.415 |
| hsa-miR-25-3p  | 4.50E-02 | -2.008 | High (predicted)             | TAGAP  | 2.66E-04 | 17.919 |
| hsa-miR-95-3p  | 3.98E-02 | -2.056 | High (predicted)             | KMO    | 2.30E-02 | 3.037  |
|                |          |        | Experimentally Observed      |        |          |        |
| hsa-miR-155-5p | 6.53E-05 | 3.781  | Observed                     | MET    | 3.40E-03 | -2.488 |

### IFNG induced genes and Th1 response

| DEM ID          | Expr p-value | Expr Fold Change | Confidence                   | DEG ID | Expr p-value | Expr Fold Change |
|-----------------|--------------|------------------|------------------------------|--------|--------------|------------------|
| hsa-miR-24-3p   | 3.88E-02     | -1.832           | High (predicted)             | FASLG  | 1.52E-05     | 17.708           |
| hsa-miR-143-3p  | 9.54E-03     | -3.585           | High (predicted)             | IL18   | 1.27E-02     | 4.807            |
| hsa-miR-23b-3p  | 1.01E-02     | -3.178           | High (predicted)             | IL18   | 1.27E-02     | 4.807            |
| hsa-miR-422a    | 9.63E-03     | -2.624           | High (predicted)             | PIK3CG | 1.09E-03     | 5.372            |
| hsa-miR-24-3p   | 3.88E-02     | -1.832           | High (predicted)             | IFNG   | 6.86E-03     | 5.864            |
| hsa-miR-9-3p    | 3.90E-03     | -2.488           | High (predicted)             | IL4    | 2.90E-02     | 2.336            |
|                 |              |                  | Experimentally Observed.High |        |              |                  |
| hsa-miR-221-3p  | 6.50E-03     | -4.286           | (predicted)                  | PIK3R1 | 4.08E-02     | 2.670            |
|                 |              |                  | Experimentally Observed      |        |              |                  |
| hsa-miR-29c-3p  | 1.12E-02     | -3.142           | Observed                     | PIK3R1 | 4.08E-02     | 2.670            |
| hsa-miR-1-3p    | 4.96E-03     | -2.715           | High (predicted)             | NFATC2 | 1.62E-02     | 3.036            |
|                 |              |                  | Experimentally Observed      |        |              |                  |
| hsa-miR-125b-5p | 4.58E-02     | -2.252           | Observed                     | CDKN2A | 4.77E-03     | 4.656            |
|                 |              |                  | Experimentally Observed      |        |              |                  |
| hsa-miR-24-3p   | 3.88E-02     | -1.832           | Observed                     | CDKN2A | 4.77E-03     | 4.656            |

|                 |          |        |                                                |         |          |        |
|-----------------|----------|--------|------------------------------------------------|---------|----------|--------|
| hsa-miR-125b-5p | 4.58E-02 | -2.252 | Experimentally<br>Observed.High<br>(predicted) | CCR5    | 7.62E-04 | 13.487 |
| hsa-miR-143-3p  | 9.54E-03 | -3.585 | High (predicted)                               | SELL    | 6.50E-03 | 8.128  |
| hsa-miR-185-5p  | 2.67E-02 | -2.574 | High (predicted)                               | CD40LG  | 5.81E-05 | 37.872 |
| hsa-miR-185-5p  | 2.67E-02 | -2.574 | High (predicted)                               | CXCL9   | 3.94E-04 | 64.052 |
| hsa-miR-193a-5p | 4.68E-02 | -1.699 | Experimentally<br>Observed                     | IL2RG   | 1.92E-05 | 14.873 |
| hsa-miR-30c-5p  | 4.34E-02 | -1.909 | High (predicted)                               | SOCS1   | 1.97E-03 | 3.929  |
| hsa-miR-409-3p  | 4.21E-02 | -1.773 | High (predicted)                               | TNFSF14 | 6.00E-03 | 8.943  |
| hsa-miR-423-5p  | 2.15E-02 | -2.171 | High (predicted)                               | SELL    | 6.50E-03 | 8.128  |
| hsa-miR-1-3p    | 4.96E-03 | -2.715 | Experimentally<br>Observed                     | NOTCH2  | 2.41E-02 | 2.302  |
| hsa-miR-101-3p  | 4.17E-02 | -2.891 | Experimentally<br>Observed                     | ICOS    | 6.66E-03 | 5.007  |
| hsa-miR-103a-3p | 2.61E-02 | -2.121 | High (predicted)                               | BTLA    | 2.37E-03 | 8.616  |
| hsa-miR-103a-3p | 2.61E-02 | -2.121 | Experimentally<br>Observed                     | ICOS    | 6.66E-03 | 5.007  |
| hsa-miR-1233-3p | 7.57E-03 | -2.523 | High (predicted)                               | CLEC4D  | 2.08E-03 | 7.891  |
| hsa-miR-1233-3p | 7.57E-03 | -2.523 | High (predicted)                               | SH2D1A  | 5.71E-05 | 11.640 |
| hsa-miR-1233-3p | 7.57E-03 | -2.523 | High (predicted)                               | UBE2L6  | 4.94E-02 | 2.116  |
| hsa-miR-125b-5p | 4.58E-02 | -2.252 | High (predicted)                               | GCNT1   | 4.48E-03 | 3.983  |
| hsa-miR-125b-5p | 4.58E-02 | -2.252 | High (predicted)                               | IRF4    | 3.49E-03 | 5.957  |
| hsa-miR-127-3p  | 4.01E-02 | -1.909 | High (predicted)                               | HLA-DOA | 5.44E-03 | 5.601  |
| hsa-miR-133a-3p | 1.45E-02 | -2.375 | High (predicted)                               | CXCL11  | 2.07E-02 | 14.705 |
| hsa-miR-143-3p  | 9.54E-03 | -3.585 | High (predicted)                               | HLA-DOA | 5.44E-03 | 5.601  |
| hsa-miR-148a-3p | 4.41E-02 | -2.648 | High (predicted)                               | HLA-A   | 5.37E-03 | 2.185  |
| hsa-miR-148a-3p | 4.41E-02 | -2.648 | High (predicted)                               | MAFB    | 2.66E-02 | 3.069  |
| hsa-miR-151a-3p | 2.50E-02 | -4.893 | High (predicted)                               | BTLA    | 2.37E-03 | 8.616  |
| hsa-miR-15a-5p  | 1.90E-02 | -2.166 | High (predicted)                               | BTLA    | 2.37E-03 | 8.616  |
| hsa-miR-15a-5p  | 1.90E-02 | -2.166 | Experimentally<br>Observed                     | NOTCH2  | 2.41E-02 | 2.302  |
| hsa-miR-185-5p  | 2.67E-02 | -2.574 | High (predicted)                               | BTLA    | 2.37E-03 | 8.616  |
| hsa-miR-20a-3p  | 1.49E-02 | -2.092 | High (predicted)                               | CCL4    | 6.28E-06 | 20.663 |
| hsa-miR-20a-3p  | 1.49E-02 | -2.092 | High (predicted)                               | TRAF1   | 7.95E-04 | 5.095  |
| hsa-miR-22-5p   | 3.81E-03 | -2.591 | High (predicted)                               | RGS1    | 6.34E-04 | 19.413 |
| hsa-miR-221-3p  | 6.50E-03 | -4.286 | High (predicted)                               | CXCL11  | 2.07E-02 | 14.705 |
| hsa-miR-23b-3p  | 1.01E-02 | -3.178 | High (predicted)                               | MRC1    | 1.63E-02 | 4.006  |
| hsa-miR-24-3p   | 3.88E-02 | -1.832 | High (predicted)                               | CXCR2   | 3.05E-02 | 2.404  |

|                 |          |        |                  |         |          |        |
|-----------------|----------|--------|------------------|---------|----------|--------|
| hsa-miR-296-5p  | 4.12E-02 | -2.217 | High (predicted) | CXCL10  | 1.71E-02 | 12.848 |
| hsa-miR-29c-3p  | 1.12E-02 | -3.142 | High (predicted) | ICOS    | 6.66E-03 | 5.007  |
| hsa-miR-29c-3p  | 1.12E-02 | -3.142 | High (predicted) | RGS1    | 6.34E-04 | 19.413 |
| hsa-miR-324-5p  | 2.03E-02 | -2.855 | High (predicted) | CTLA4   | 3.83E-03 | 10.680 |
| hsa-miR-324-5p  | 2.03E-02 | -2.855 | High (predicted) | S1PR4   | 1.78E-04 | 7.144  |
| hsa-miR-335-5p  | 2.05E-02 | -2.221 | High (predicted) | PTPN22  | 7.35E-05 | 16.747 |
| hsa-miR-345-5p  | 1.38E-02 | -2.108 | High (predicted) | RGS1    | 6.34E-04 | 19.413 |
| hsa-miR-345-5p  | 1.38E-02 | -2.108 | High (predicted) | UBE2L6  | 4.94E-02 | 2.116  |
| hsa-miR-376a-3p | 2.56E-03 | -2.627 | High (predicted) | RGS1    | 6.34E-04 | 19.413 |
| hsa-miR-379-5p  | 1.27E-02 | -2.367 | High (predicted) | CXCL11  | 2.07E-02 | 14.705 |
| hsa-miR-379-5p  | 1.27E-02 | -2.367 | High (predicted) | HLA-E   | 1.56E-02 | 2.118  |
| hsa-miR-379-5p  | 1.27E-02 | -2.367 | High (predicted) | ICOS    | 6.66E-03 | 5.007  |
| hsa-miR-379-5p  | 1.27E-02 | -2.367 | High (predicted) | SIT1    | 1.59E-04 | 13.192 |
| hsa-miR-423-5p  | 2.15E-02 | -2.171 | High (predicted) | RGS1    | 6.34E-04 | 19.413 |
| hsa-miR-455-3p  | 1.49E-02 | -3.286 | High (predicted) | UBE2L6  | 4.94E-02 | 2.116  |
| hsa-miR-486-5p  | 4.58E-02 | -1.997 | High (predicted) | CD247   | 3.23E-05 | 17.934 |
| hsa-miR-494-3p  | 8.19E-03 | -3.473 | High (predicted) | UBE2L6  | 4.94E-02 | 2.116  |
| hsa-miR-499a-5p | 6.18E-03 | -3.810 | High (predicted) | CXCL11  | 2.07E-02 | 14.705 |
| hsa-miR-9-5p    | 3.53E-03 | -2.877 | High (predicted) | CXCL11  | 2.07E-02 | 14.705 |
| hsa-miR-25-3p   | 4.50E-02 | -2.008 | High (predicted) | BTLA    | 2.37E-03 | 8.616  |
| hsa-miR-106b-5p | 3.04E-02 | -2.348 | High (predicted) | CCNG2   | 3.80E-02 | 2.907  |
| hsa-miR-378a-5p | 2.80E-03 | -3.147 | High (predicted) | CCNG2   | 3.80E-02 | 2.907  |
| hsa-miR-27b-3p  | 6.08E-03 | -4.055 | High (predicted) | GOLM1   | 1.77E-02 | 2.101  |
| hsa-miR-1-3p    | 4.96E-03 | -2.715 | High (predicted) | SAMSN1  | 9.63E-03 | 7.424  |
| hsa-miR-133a-3p | 1.45E-02 | -2.375 | High (predicted) | CRTAM   | 3.17E-05 | 27.814 |
| hsa-miR-145-3p  | 3.93E-03 | -2.508 | High (predicted) | CD226   | 1.47E-03 | 6.472  |
|                 |          |        | Experimentally   |         |          |        |
| hsa-miR-145-5p  | 2.04E-03 | -3.042 | Observed         | PARP8   | 9.04E-05 | 4.981  |
| hsa-miR-15a-5p  | 1.90E-02 | -2.166 | High (predicted) | CNOT6L  | 3.85E-02 | 2.125  |
| hsa-miR-193a-5p | 4.68E-02 | -1.699 | High (predicted) | KLRD1   | 5.02E-05 | 16.503 |
| hsa-miR-23b-3p  | 1.01E-02 | -3.178 | High (predicted) | FUT4    | 4.21E-03 | 2.243  |
| hsa-miR-24-2-5p | 2.27E-02 | -2.073 | High (predicted) | UBA7    | 8.60E-03 | 2.356  |
| hsa-miR-27b-3p  | 6.08E-03 | -4.055 | High (predicted) | STYK1   | 1.55E-05 | 14.721 |
| hsa-miR-29c-3p  | 1.12E-02 | -3.142 | High (predicted) | COL5A1  | 2.13E-02 | 2.232  |
| hsa-miR-29c-3p  | 1.12E-02 | -3.142 | High (predicted) | NAV1    | 3.06E-02 | 2.271  |
| hsa-miR-324-5p  | 2.03E-02 | -2.855 | High (predicted) | CRTAM   | 3.17E-05 | 27.814 |
| hsa-miR-422a    | 9.63E-03 | -2.624 | High (predicted) | CD226   | 1.47E-03 | 6.472  |
| hsa-miR-455-3p  | 1.49E-02 | -3.286 | High (predicted) | FAM105A | 2.11E-03 | 5.505  |
| hsa-miR-744-5p  | 3.05E-02 | -2.097 | High (predicted) | PLD4    | 3.94E-03 | 2.853  |

|               |          |        |                  |       |          |       |
|---------------|----------|--------|------------------|-------|----------|-------|
| hsa-miR-25-3p | 4.50E-02 | -2.008 | High (predicted) | IFIT2 | 8.54E-03 | 3.203 |
|---------------|----------|--------|------------------|-------|----------|-------|

---

Left. experimental fold change and P value of each DEM; right. experimental fold change and P value of each DEG
