# Supplementary material for: miRNAs may play a major role in the control of gene expression in key pathobiological processes in Chagas disease cardiomyopathy
Source: PubMed Central journal article supplement (PMC7787679; doi:10.1371/journal.pntd.0008889), 2020-12-22
Supplement: pntd.0008889.s011.pdf [file pntd.0008889.s011.pdf]

**S11 table.** Five DEMs that control a large number of DEGS and processes in CCC myocardium.

| <b>DEM ID</b>   | <b># DEG TARGETS</b> | <b># PROCESS</b> | <b>DEG TARGETS</b>                                                                                                                                               | <b>PROCESSES</b>                                                                                                                     |
|-----------------|----------------------|------------------|------------------------------------------------------------------------------------------------------------------------------------------------------------------|--------------------------------------------------------------------------------------------------------------------------------------|
| hsa-miR-125b-5p | 23                   | 6                | ATP10D BIN2 GMIP GPR160<br>KLHL6 NPL PTPN18 RHEBL1<br>SLA2 C1orf38 TIFAB ZNF624<br>ZSWIM5 BMF CD69 PRDM1<br>PSTPIP2 SEMA4D GCNT1 IRF4<br>CDKN2A CCR5 TNFAIP3     | Inflammation,<br>Th1 response,<br>fibrosis,<br>extracellular matrix,<br>hypertrophy,<br>mitochondria,                                |
| hsa-miR-15a-5p  | 23                   | 5                | FCRL2 GPR171 HLA-DQB2 HLA-<br>F ISLR LAMP3 C2orf43 LY9<br>MTMR11 MYB RAB30 SYNRG<br>TFCP2L1 TRANK1 CNOT6L<br>TNFSF13B WIPF1 BTLA NOTCH2<br>IGF1 FLT3 SLIT2 KCNN4 | Inflammation,<br>Th1 response,<br>fibrosis,<br>extracellular matrix,<br>hypertrophy,                                                 |
| hsa-miR-296-5p  | 22                   | 6                | C10orf105 CLDN3 DERL3 ESPNL<br>GDF10 KRTCAP3 MARVELD1<br>NFAM1 NUAKE2 RAB37 SNX20<br>TBC1D10C BMF CCL28 CD300LF<br>CD6 CD8A TNFSF13 CXCL10<br>E2F2 KCNN4 TRPM2   | Inflammation,<br>Th1 response,<br>fibrosis,<br>hypertrophy,<br>oxidative stress,<br>contraction and contractility of<br>heart muscle |
| hsa-miR-29c-3p  | 21                   | 8                | ARRDC3 C1orf96 COL5A2<br>N4BP2L1 NAP1L3 NPAS3 RAB30<br>TMEM236 ZBTB37 COL5A1<br>NAV1 BMF COL4A4 TNFRSF9                                                          | Inflammation,<br>Th1 response,<br>fibrosis,<br>extracellular matrix,<br>hypertrophy,                                                 |

|                 |    |   |                                                                                                                                              |                                                                                           |
|-----------------|----|---|----------------------------------------------------------------------------------------------------------------------------------------------|-------------------------------------------------------------------------------------------|
|                 |    |   | ICOS RGS1 COL1A2 TNFAIP3<br>PIK3R1 CASP8                                                                                                     | oxydative stress,<br>mitochondria,<br>Arrythmia                                           |
| hsa-miR-103a-3p | 20 | 6 | DOK3 C20orf103 NPL RAB30<br>C5orf25 SLAMF6 TIFAB TRIM14<br>TRIM66 ZNF226 ZNF831 AIM2<br>CD84 CXCL16 SAMD9L TNFSF13<br>BTLA CTSK CD40LG CXCL9 | Inflammation,<br>Th1 response,<br>fibrosis,<br>hypertrophy,<br>mitochondria,<br>Arrythmia |

---
