# Supplementary material for: miRNAs may play a major role in the control of gene expression in key pathobiological processes in Chagas disease cardiomyopathy
Source: PLoS Negl Trop Dis. 2020 Dec 22;14(12):e0008889. doi: 10.1371/journal.pntd.0008889 (PMC7787679; doi:10.1371/journal.pntd.0008889)
Supplement: S4 Table — (PDF) [file pntd.0008889.s004.pdf]

**S4 table.** Number of DEGs shared between several pathobiological functions or processes in CCC myocardium.

|                             | IFNG/<br>Th1 response | Fibrosis | Extra<br>cellular matrix | Hypertrophy | Contraction/<br>contractibility | Nrf2 and<br>oxidative stress | Mitochondria | Arrhythmia |
|-----------------------------|-----------------------|----------|--------------------------|-------------|---------------------------------|------------------------------|--------------|------------|
| Inflammation                | 104                   | 64       | 26                       | 34          | 20                              | 16                           | 14           | 13         |
| IFNG/Th1 response           |                       | 32       | 13                       | 18          | 8                               | 3                            | 7            | 5          |
| Fibrosis                    |                       |          | 16                       | 27          | 13                              | 4                            | 2            | 9          |
| Extracellular matrix        |                       |          |                          | 11          | 6                               | 5                            | 3            | 4          |
| Hypertrophy                 |                       |          |                          |             | 17                              | 4                            | 2            | 9          |
| Contraction/contractibility |                       |          |                          |             |                                 | 5                            | 1            | 11         |
| Nrf2 and oxidative stress   |                       |          |                          |             |                                 |                              | 2            | 2          |
| Mitochondria                |                       |          |                          |             |                                 |                              |              | 1          |
